# Supplementary material for: The Oral Health of a Group of 19th Century South Australian Settlers in Relation to Their General Health and Compared With That of Contemporaneous Samples
Source: Preprints.org preprint supplement (doi:10.20944/preprints202302.0167.v1), 2023-02-09
Supplement: Supplementary file 1 [file Supplementary_Data_S1_Gurr. 2022_RAW DATA_Statistical Analysis_EXCEL_.xlsx]

## Sheet: INTRA_INTER OPERATORS RAW DATA
Rater	Rating	Method	Measurement	ID	Skeletal age	Skeletal age range	Dental age range	Sex	Surface	Sample type	UR_Central_Incisor 11/51	UR_Lateral_Incisor 12/52	UR_Canine 13/53	UR_First_molar 54	UR_First_Premolar 14	UR_Second_molar_55	UR_Second_Premolar 15	UR_First Molar 16	UR_Second_Molar_17	UR_Third_Molar 18	UL_Central_Incisor 21/61	UL_Lateral_incisor 22/62	UL_Canine 23/63	UL_First_molar__64	UL_First_Premolar 24	UL_Second_molar_65	UL_Second_Premolar 25	UL_First_Molar_26	UL_Second_Molar_27	UL_Third_Molar_28	LL_Central_Incisor 31/71	LL_Lateral Incisor 32/72	LL_Canine 33/73	LL_First_molar_74	LL_First_Premolar 34	LL_Second_molar_75	LL_Second_Premolar 35	LL_First_Molar_36	LL_Second_Molar_37	LL_Third_Molar_38	lr_Central_Incisor 41/81	lr_Lateral_Incisor 42/82	lr_Canine 43/83	lr_First_molar_84	lr_First_Premolar 44	lr_Second_molar_85	lr_Second_Premolar 45	lr_First_Molar__46	lr_Second_Molar_47
AG	1	Macro	Inventory	SMB 73	35	35 to 45	< 23.5	M	labial/buccal	whole skull	2	2	2		4		3	2	3	3	2	2	2		3		2	3	3	2	2	2	2		2		2	3	3	4	2	2	2		2		2	3	3
AG	1	Macro	Tooth Wear	SMB 73	35	35 to 45	< 23.5	M	occlusal	whole skull	4	4	4		N/A		N/A	2	N/A	N/A	4	4	4		N/A		4	N/A	N/A	2	4	3	3		3		3	N/A	N/A	N/A	4	4	4		2		3	N/A	N/A
AG	1	Macro	Dental Trauma	SMB 73	35	35 to 45	< 23.5	M	labial/buccal	whole skull	0	1	0		N/A		N/A	0	N/A	N/A	3	0	0		N/A		0	N/A	N/A	0	0	0	0		0		0	N/A	N/A	N/A	0	3	0		0		0	N/A	N/A
AG	1	Macro	Dental Trauma	SMB 73	35	35 to 45	< 23.5	M	lingual	whole skull	0	0	0		N/A		N/A	0	N/A	N/A	3	0	0		N/A		0	N/A	N/A	0	0	0	0		0		0	N/A	N/A	N/A	0	3	0		0		0	N/A	N/A
AG	1	Macro	Occlusion	SMB 73	35	35 to 45	< 23.5	M	occlusal	whole skull
AG	1	Macro	Overbite	SMB 73	35	35 to 45	< 23.5	M	labial/buccal	whole skull	1	1	1								2	1	0
AG	1	Macro	Overjet	SMB 73	35	35 to 45	< 23.5	M	labial/buccal	whole skull	4	2	2								4	4	3
AG	1	Macro	Caries - present on tooth	SMB 73	35	35 to 45	< 23.5	M	All	whole skull	0	1	1		N/A		N/A	1	N/A	N/A	1	1	0		N/A		1	N/A	N/A	1	1	1	1		1		1	N/A	N/A	N/A	1	1	1		0		1	N/A	N/A
AG	1	Macro	Caries- location 1	SMB 73	35	35 to 45	< 23.5	M	mesial	whole skull	0	1	1		N/A		N/A	1	N/A	N/A	2	1	0		N/A		1	N/A	N/A	1	1	1	1		1		1	N/A	N/A	N/A	1	2	1		0		1	N/A	N/A
AG	1	Macro	Caries- location 2	SMB 73	35	35 to 45	< 23.5	M	distal	whole skull	0	1	2		N/A		N/A	1	N/A	N/A	1	1	0		N/A		1	N/A	N/A	1	1	1	1		2		1	N/A	N/A	N/A	1	1	1		0		2	N/A	N/A
AG	1	Macro	Caries- location 3	SMB 73	35	35 to 45	< 23.5	M	occlusal	whole skull	0	2	2		N/A		N/A	1	N/A	N/A	2	2	0		N/A		1	N/A	N/A	1	2	2	2		1		2	N/A	N/A	N/A	2	2	2		0		1	N/A	N/A
AG	1	Macro	Caries- location 4	SMB 73	35	35 to 45	< 23.5	M	labial/buccal	whole skull	0	2	2		N/A		N/A	1	N/A	N/A	2	2	0		N/A		1	N/A	N/A	2	2	2	2		2		1	N/A	N/A	N/A	2	2	2		0		2	N/A	N/A
AG	1	Macro	Caries- location 5	SMB 73	35	35 to 45	< 23.5	M	lingual	whole skull	0	2	2		N/A		N/A	1	N/A	N/A	2	2	0		N/A		1	N/A	N/A	1	2	2	2		2		1	N/A	N/A	N/A	2	2	2		0		2	N/A	N/A
AG	1	Macro	Caries _ CEJ 1	SMB 73	35	35 to 45	< 23.5	M	labial/buccal	whole skull	0	1	1		N/A		N/A	1	N/A	N/A	1	1	1		N/A		1	N/A	N/A	1	2	1	1		2		1	N/A	N/A	N/A	2	2	2		0		2	N/A	N/A
AG	1	Macro	Caries _ CEJ 2	SMB 73	35	35 to 45	< 23.5	M	labial/buccal	whole skull	0	2	1		N/A		N/A	1	N/A	N/A	2	2	2		N/A		2	N/A	N/A	2	1	1	1		1		1	N/A	N/A	N/A	1	2	1		0		1	N/A	N/A
AG	1	Macro	Caries _ CEJ 3	SMB 73	35	35 to 45	< 23.5	M	labial/buccal	whole skull	0	1	1		N/A		N/A	1	N/A	N/A	2	1	2		N/A		1	N/A	N/A	1	2	1	2		1		1	N/A	N/A	N/A	1	1	1		0		1	N/A	N/A
AG	1	Macro	Caries - Radiolucency	SMB 73	35	35 to 45	< 23.5	M	labial/buccal	whole skull
AG	1	Macro	Alveolar status	SMB 73	35	35 to 45	< 23.5	M	labial/buccal	whole skull					4		0	0	0	0					2		0	0	0	0					3		2	0	0	0					4		3	0	0
AG	1	Macro	Periodontal disease	SMB 73	35	35 to 45	< 23.5	M	labial/buccal	whole skull	3	4	3		N/A		N/A	6	N/A	N/A	3	4	5		N/A		3	N/A	N/A	4	7	6	4		6		6	N/A	N/A	N/A	5	4	3		5		7	N/A	N/A
AG	1	Macro	Periodontal disease	SMB 73	35	35 to 45	< 23.5	M	lingual	whole skull	0	0	2		N/A		N/A	9	N/A	N/A	2	2	3		N/A		4	N/A	N/A	6	7	6	5		6		6	N/A	N/A	N/A	6	5	3		6		6	N/A	N/A
AG	1	Macro	Enamel hypoplastic defect - present	SMB 73	35	35 to 45	< 23.5	M	labial/buccal	whole skull	1	1	1		N/A		N/A	1	N/A	N/A	1	1	1		N/A		1	N/A	N/A	0	1	1	1		1		0	N/A	N/A	N/A	1	1	1		1		0	N/A	N/A
AG	1	Macro	Enamel hypoplastic defect - present	SMB 73	35	35 to 45	< 23.5	M	lingual	whole skull	1	0	1		N/A		N/A	1	N/A	N/A	0	0	1		N/A		0	N/A	N/A	0	1	1	1		0		0	N/A	N/A	N/A	1	1	1		1		0	N/A	N/A
AG	1	Macro	Enamel hypoplastic defect - type -linear	SMB 73	35	35 to 45	< 23.5	M	labial/buccal	whole skull	1	2	1		N/A		N/A	2	N/A	N/A	1	2	1		N/A		1	N/A	N/A	0	1	1	1		2		0	N/A	N/A	N/A	1	2	2		2		0	N/A	N/A
AG	1	Macro	Enamel hypoplastic defect - type -linear	SMB 73	35	35 to 45	< 23.5	M	lingual	whole skull	2	0	2		N/A		N/A	2	N/A	N/A	0	0	2		N/A		0	N/A	N/A	0	1	1	2		0		0	N/A	N/A	N/A	1	1	2		0		0	N/A	N/A
AG	1	Macro	Enamel hypoplastic defects-number of lines	SMB 73	35	35 to 45	< 23.5	M	labial/buccal	whole skull	2	0	1		N/A		N/A	0	N/A	N/A	2	0	1		N/A		1	N/A	N/A	0	1	1	2		0		0	N/A	N/A	N/A	1	0	0		0		0	N/A	N/A
AG	1	Macro	Enamel hypoplastic defects-number of lines	SMB 73	35	35 to 45	< 23.5	M	lingual	whole skull	0	0	0		N/A		N/A	0	N/A	N/A	0	0	0		N/A		0	N/A	N/A	0	2	1	0		0		0	N/A	N/A	N/A	2	1	0		0		0	N/A	N/A
AG	1	Macro	Enamel hypoplastic defect - type - pits	SMB 73	35	35 to 45	< 23.5	M	labial/buccal	whole skull	1	1	1		N/A		N/A	1	N/A	N/A	1	1	1		N/A		1	N/A	N/A	0	1	1	1		1		0	N/A	N/A	N/A	1	1	1		1		0	N/A	N/A
AG	1	Macro	Enamel hypoplastic defect - type - pits	SMB 73	35	35 to 45	< 23.5	M	lingual	whole skull	1	0	1		N/A		N/A	1	N/A	N/A	0	0	1		N/A		0	N/A	N/A	0	2	2	1		0		0	N/A	N/A	N/A	2	2	1		0		0	N/A	N/A
AG	1	Macro	Enamel hypoplastic defects-number of pits	SMB 73	35	35 to 45	< 23.5	M	labial/buccal	whole skull	2	2	2		N/A		N/A	2	N/A	N/A	2	2	2		N/A		1	N/A	N/A	0	2	2	2		2		0	N/A	N/A	N/A	2	2	2		2		0	N/A	N/A
AG	1	Macro	Enamel hypoplastic defects-number of pits	SMB 73	35	35 to 45	< 23.5	M	lingual	whole skull	2	0	2		N/A		N/A	2	N/A	N/A	0	0	2		N/A		0	N/A	N/A	0	0	0	2		0		0	N/A	N/A	N/A	0	0	2		0		0	N/A	N/A
AG	1	Macro	Enamel hypoplastic defect - measurement 1 (mm)	SMB 73	35	35 to 45	< 23.5	M	labial/buccal	whole skull	3	5	3		N/A		N/A	1	N/A	N/A	3.5	6.5	5		N/A		1	N/A	N/A	0	2.5	3	4		4		0	N/A	N/A	N/A	3	5	4.5		4		0	N/A	N/A
AG	1	Macro	Enamel hypoplastic defect - measurement 1 (mm)	SMB 73	35	35 to 45	< 23.5	M	lingual	whole skull	0	0	4		N/A		N/A	1	N/A	N/A	0	0	2		N/A		0	N/A	N/A	0	2.5	2.5	6		0		0	N/A	N/A	N/A	2	3	5		0		0	N/A	N/A
AG	1	Macro	Enamel hypoplastic defect - measurement 2 (mm)	SMB 73	35	35 to 45	< 23.5	M	labial/buccal	whole skull	4	0	0		N/A		N/A	0	N/A	N/A	5	0	4		N/A		5	N/A	N/A	0	4	5	5		0		0	N/A	N/A	N/A	5	0	0		0		0	N/A	N/A
AG	1	Macro	Enamel hypoplastic defect - measurement 2 (mm)	SMB 73	35	35 to 45	< 23.5	M	lingual	whole skull	0	0	4		N/A		N/A	0	N/A	N/A	0	0	0		N/A		0	N/A	N/A	0	4	4	0		0		0	N/A	N/A	N/A	4	0	0		0		0	N/A	N/A
AG	1	Macro	Enamel hypoplastic defect - measurement 3 (mm)	SMB 73	35	35 to 45	< 23.5	M	labial/buccal	whole skull	6	0	0		N/A		N/A	0	N/A	N/A	5	0	0		N/A		0	N/A	N/A	0	0	0	5		0		0	N/A	N/A	N/A	0	0	0		0		0	N/A	N/A
AG	1	Macro	Enamel hypoplastic defect - measurement 3 (mm)	SMB 73	35	35 to 45	< 23.5	M	lingual	whole skull	0	0	0		N/A		N/A	0	N/A	N/A	0	0	0		N/A		0	N/A	N/A	0	0	0	0		0		0	N/A	N/A	N/A	0	0	0		0		0	N/A	N/A
AG	1	Macro	Enamel hypoplastic defect - measurement 4 (mm)	SMB 73	35	36 to 45	< 23.5	M	labial/buccal	whole skull	0	0	0		N/A		N/A	0	N/A	N/A	0	0	0		N/A		0	N/A	N/A	0	0	0	0		0		0	N/A	N/A	N/A	0	0	0		0		0	N/A	N/A
AG	1	Macro	Enamel hypoplastic defect - measurement 4 (mm)	SMB 73	35	37 to 45	< 23.5	M	lingual	whole skull	0	0	0		N/A		N/A	0	N/A	N/A	0	0	0		N/A		0	N/A	N/A	0	0	0	0		0		0	N/A	N/A	N/A	0	0	0		0		0	N/A	N/A
AG	1	Macro	IGD - present	SMB 73	35	35 to 45	< 23.5	M	internal	whole skull
AG	1	Radiographic	Inventory	SMB 73	35	35 to 45	< 23.5	M	labial/buccal	whole skull	2	2	2		3		3	2	3	3	2	2	2		3		2	3	3	2	2	2	2		2		2	3	3	3	2	2	2		2		2	3	3
AG	1	Radiographic	Tooth Wear	SMB 73	35	35 to 45	< 23.5	M	occlusal	whole skull	5	5	5		0		0	4	0	0	5	5	5		0		4	0	0	4	5	5	5		5		5	0	0	0	5	5	5		4		4	0	0
AG	1	Radiographic	Dental Trauma	SMB 73	35	35 to 45	< 23.5	M	labial/buccal	whole skull	0	0	0		N/A		N/A	N/A	3	N/A	3	0	0		N/A		0	N/A	N/A	0	0	0	0		0		0	N/A	N/A	N/A	0	3	0		0		0	N/A	N/A
AG	1	Radiographic	Dental Trauma	SMB 73	35	35 to 45	< 23.5	M	lingual	whole skull
AG	1	Radiographic	Occlusion	SMB 73	35	35 to 45	< 23.5	M	Occlusal	whole skull
AG	1	Radiographic	Overbite	SMB 73	35	35 to 45	< 23.5	M	occlusal	whole skull
AG	1	Radiographic	Overjet	SMB 73	35	35 to 45	< 23.5	M	occlusal	whole skull
AG	1	Radiographic	Caries - present on tooth	SMB 73	35	35 to 45	< 23.5	M	All	whole skull	1	1	1		N/A		N/A	N/A	1	N/A	0	1	0		N/A		1	N/A	N/A	1	1	1	1		0		1	N/A	N/A	N/A	1	1	0		0		0	N/A	N/A
AG	1	Radiographic	Caries- location 1	SMB 73	35	35 to 45	< 23.5	M	mesial	whole skull	2	1	1		N/A		N/A	N/A	1	N/A	0	1	0		N/A		1	N/A	N/A	1	1	2	1		0		0	N/A	N/A	N/A	2	1	0		0		0	N/A	N/A
AG	1	Radiographic	Caries- location 2	SMB 73	35	35 to 45	< 23.5	M	distal	whole skull	1	2	2		N/A		N/A	N/A	2	N/A	0	2	0		N/A		2	N/A	N/A	2	2	1	2		0		1	N/A	N/A	N/A	1	1	1		0		2	N/A	N/A
AG	1	Radiographic	Caries- location 3	SMB 73	35	35 to 45	< 23.5	M	occlusal	whole skull
AG	1	Radiographic	Caries- location 4	SMB 73	35	35 to 45	< 23.5	M	labial/buccal	whole skull
AG	1	Radiographic	Caries- location 5	SMB 73	35	35 to 45	< 23.5	M	lingual	whole skull
AG	1	Radiographic	Caries _ CEJ 1	SMB 73	35	35 to 45	< 23.5	M	labial/buccal	whole skull	2	2	2		N/A		N/A	N/A	2	N/A	0	2	0		N/A		2	N/A	N/A	2	2	2	2		0		0	N/A	N/A	N/A	2	2	0		0		0	N/A	N/A
AG	1	Radiographic	Caries _ CEJ 2	SMB 73	35	35 to 45	< 23.5	M	labial/buccal	whole skull	1	1	2		N/A		N/A	N/A	2	N/A	0	1	0		N/A		2	N/A	N/A	1	1	1	1		0		0	N/A	N/A	N/A	1	1	0		0		0	N/A	N/A
AG	1	Radiographic	Caries _ CEJ 3	SMB 73	35	35 to 45	< 23.5	M	labial/buccal	whole skull	2	2	1		N/A		N/A	N/A	1	N/A	0	2	0		N/A		1	N/A	N/A	2	2	2	2		0		2	N/A	N/A	N/A	2	2	0		0		0	N/A	N/A
AG	1	Radiographic	Caries - Radiolucency	SMB 73	35	35 to 45	< 23.5	M	labial/buccal	whole skull	3	3	3		N/A		N/A	N/A	2	N/A	0	3	0		N/A		3	N/A	N/A	3	3	3	3		0		0	N/A	N/A	N/A	3	3	0		0		0	N/A	N/A
AG	1	Radiographic	Alveolar status	SMB 73	35	35 to 45	< 23.5	M	labial/buccal	whole skull
AG	1	Radiographic	Periodontal disease	SMB 73	35	35 to 45	< 23.5	M	labial/buccal	whole skull
AG	1	Radiographic	Periodontal disease	SMB 73	35	35 to 45	< 23.5	M	lingual	whole skull
AG	1	Radiographic	Enamel hypoplastic defect - present	SMB 73	35	35 to 45	< 23.5	M	labial/buccal	whole skull
AG	1	Radiographic	Enamel hypoplastic defect - present	SMB 73	35	35 to 45	< 23.5	M	lingual	whole skull
AG	1	Radiographic	Enamel hypoplastic defect - type -linear	SMB 73	35	35 to 45	< 23.5	M	labial/buccal	whole skull
AG	1	Radiographic	Enamel hypoplastic defect - type -linear	SMB 73	35	35 to 45	< 23.5	M	lingual	whole skull
AG	1	Radiographic	Enamel hypoplastic defects-number of lines	SMB 73	35	35 to 45	< 23.5	M	labial/buccal	whole skull
AG	1	Radiographic	Enamel hypoplastic defects-number of lines	SMB 73	35	35 to 45	< 23.5	M	lingual	whole skull
AG	1	Radiographic	Enamel hypoplastic defect - type - pits	SMB 73	35	35 to 45	< 23.5	M	labial/buccal	whole skull
AG	1	Radiographic	Enamel hypoplastic defect - type - pits	SMB 73	35	35 to 45	< 23.5	M	lingual	whole skull
AG	1	Radiographic	Enamel hypoplastic defects-number of pits	SMB 73	35	35 to 45	< 23.5	M	labial/buccal	whole skull
AG	1	Radiographic	Enamel hypoplastic defects-number of pits	SMB 73	35	35 to 45	< 23.5	M	lingual	whole skull
AG	1	Radiographic	Enamel hypoplastic defect - measurement 1 (mm)	SMB 73	35	35 to 45	< 23.5	M	labial/buccal	whole skull
AG	1	Radiographic	Enamel hypoplastic defect - measurement 1 (mm)	SMB 73	35	35 to 45	< 23.5	M	lingual	whole skull
AG	1	Radiographic	Enamel hypoplastic defect - measurement 2 (mm)	SMB 73	35	35 to 45	< 23.5	M	labial/buccal	whole skull
AG	1	Radiographic	Enamel hypoplastic defect - measurement 2 (mm)	SMB 73	35	35 to 45	< 23.5	M	lingual	whole skull
AG	1	Radiographic	Enamel hypoplastic defect - measurement 3 (mm)	SMB 73	35	35 to 45	< 23.5	M	labial/buccal	whole skull
AG	1	Radiographic	Enamel hypoplastic defect - measurement 3 (mm)	SMB 73	35	35 to 45	< 23.5	M	lingual	whole skull
AG	1	Radiographic	Enamel hypoplastic defect - measurement 4 (mm)	SMB 73	35	35 to 45	< 23.5	M	labial/buccal	whole skull
AG	1	Radiographic	Enamel hypoplastic defect - measurement 4 (mm)	SMB 73	35	35 to 45	< 23.5	M	lingual	whole skull
AG	1	Radiographic	IGD - present	SMB 73	35	35 to 45	< 23.5	M	internal	whole skull
AG	1	L.v micro-CT	Inventory	SMB 73	35	35 to 45	< 23.5	M	labial/buccal	whole skull	2	2	2		4		3	2	3	3	2	2	2		3		5	3	3	2	2	2	2		2		2	3	3	3	2	2	2		2		2	3	3
AG	1	L.v micro-CT	Tooth Wear	SMB 73	35	35 to 45	< 23.5	M	occlusal	whole skull	4	4	4		0		0	3	0	0	4	4	4		0			0	0	2	5	5	5		3		4	0	0	0	5	5	5		4		3	0	0
AG	1	L.v micro-CT	Dental Trauma	SMB 73	35	35 to 45	< 23.5	M	labial/buccal	whole skull	0	0	0		N/A		N/A	0	N/A	N/A	2	0	0		N/A		3	0	0	N/A	0	0	0		0		0	N/A	N/A	N/A	0	3	0		0		0	N/A	N/A
AG	1	L.v micro-CT	Dental Trauma	SMB 73	35	35 to 45	< 23.5	M	lingual	whole skull	0	0	0		N/A		N/A	0	N/A	N/A	2	0	0		N/A		3	0	0	N/A	0	0	0		0		0	N/A	N/A	N/A	0	3	0		0		0	N/A	N/A
AG	1	L.v micro-CT	Occlusion	SMB 73	35	35 to 45	< 23.5	M	occlusal	whole skull
AG	1	L.v micro-CT	Overbite	SMB 73	35	35 to 45	< 23.5	M	occlusal	whole skull	1.5	1.7	1.5								2	1.5	1.53
AG	1	L.v micro-CT	Overjet	SMB 73	35	35 to 45	< 23.5	M	occlusal	whole skull	1.45	1.87	3.38								1.77	2	1.68
AG	1	L.v micro-CT	Caries - present on tooth	SMB 73	35	35 to 45	< 23.5	M	All	whole skull	0	1	1		N/A		N/A	1	N/A	N/A	0	1	1		N/A		0	N/A	N/A	0	1	1	1		1		1	N/A	N/A	N/A	1	1	1		0		1	N/A	N/A
AG	1	L.v micro-CT	Caries- location 1	SMB 73	35	35 to 45	< 23.5	M	mesial	whole skull	0	1	1		N/A		N/A	1	N/A	N/A	0	1	1		N/A		0	N/A	N/A	0	1	1	1		1		2	N/A	N/A	N/A	1	2	2		0		2	N/A	N/A
AG	1	L.v micro-CT	Caries- location 2	SMB 73	35	35 to 45	< 23.5	M	distal	whole skull	0	2	1		N/A		N/A	2	N/A	N/A	0	1	2		N/A		0	N/A	N/A	0	1	1	2		2		1	N/A	N/A	N/A	1	1	2		0		2	N/A	N/A
AG	1	L.v micro-CT	Caries- location 3	SMB 73	35	35 to 45	< 23.5	M	occlusal	whole skull	0	2	2		N/A		N/A	2	N/A	N/A	0	2	2		N/A		0	N/A	N/A	0	2	2	2		2		2	N/A	N/A	N/A	2	2	2		0		1	N/A	N/A
AG	1	L.v micro-CT	Caries- location 4	SMB 73	35	35 to 45	< 23.5	M	labial/buccal	whole skull	0	2	2		N/A		N/A	2	N/A	N/A	0	2	2		N/A		0	N/A	N/A	0	2	2	2		2		2	N/A	N/A	N/A	2	2	1		0		1	N/A	N/A
AG	1	L.v micro-CT	Caries- location 5	SMB 73	35	35 to 45	< 23.5	M	lingual	whole skull	0	2	2		N/A		N/A	2	N/A	N/A	0	2	2		N/A		0	N/A	N/A	0	2	2	2		2		2	N/A	N/A	N/A	2	2	2		0		2	N/A	N/A
AG	1	L.v micro-CT	Caries _ CEJ 1	SMB 73	35	35 to 45	< 23.5	M	labial/buccal	whole skull	0	2	2		N/A		N/A	2	N/A	N/A	0	2	2		N/A		0	N/A	N/A	0	2	1	2		2		2	N/A	N/A	N/A	2	2	2		0		1	N/A	N/A
AG	1	L.v micro-CT	Caries _ CEJ 2	SMB 73	35	35 to 45	< 23.5	M	labial/buccal	whole skull	0	1	1		N/A		N/A	1	N/A	N/A	0	1	1		N/A		0	N/A	N/A	0	1	1	1		1		1	N/A	N/A	N/A	1	1	1		0		1	N/A	N/A
AG	1	L.v micro-CT	Caries _ CEJ 3	SMB 73	35	35 to 45	< 23.5	M	labial/buccal	whole skull	0	2	2		N/A		N/A	2	N/A	N/A	0	2	2		N/A		0	N/A	N/A	0	2	2	2		2		2	N/A	N/A	N/A	2	2	2		0		2	N/A	N/A
AG	1	L.v micro-CT	Caries - Radiolucency	SMB 73	35	35 to 45	< 23.5	M	labial/buccal	whole skull	0	2	1		N/A		N/A	2	N/A	N/A	0	2	2		N/A		0	N/A	N/A	0	2	2	2		2		2	N/A	N/A	N/A	3	2	1		0		1	N/A	N/A
AG	1	L.v micro-CT	Alveolar status	SMB 73	35	35 to 45	< 23.5	M	labial/buccal	whole skull					0		0	3	0	0					0		3	0	0	3					4		4	0	0	0					4		4	0	0
AG	1	L.v micro-CT	Periodontal disease	SMB 73	35	35 to 45	< 23.5	M	labial/buccal	whole skull	3.24	5.73	3.4		N/A		N/A	6.12	N/A	N/A	3.95	5.16	4.69		N/A		4.32	N/A	N/A	4.95	4.86	5.41	4.37		4.75		3.86	N/A	N/A	N/A	5.1	3.52	3.22		4.86		4.38	N/A	N/A
AG	1	L.v micro-CT	Periodontal disease	SMB 73	35	35 to 45	< 23.5	M	lingual	whole skull	3.08	2.72	3.68		N/A		N/A	7.3	N/A	N/A	3.28	2.18	3.58		N/A		3.96	N/A	N/A	6.57	6.09	5.53	3.88		4.48		4.82	N/A	N/A	N/A	6	4.6	2.76		5.61		5.05	N/A	N/A
AG	1	L.v micro-CT	Enamel hypoplastic defect - present	SMB 73	35	35 to 45	< 23.5	M	labial/buccal	whole skull	1	1	1		N/A		N/A	1	N/A	N/A	1	1	1		N/A		1	N/A	N/A	1	1	1	1		1		0	N/A	N/A	N/A	1	1	1		1		1	N/A	N/A
AG	1	L.v micro-CT	Enamel hypoplastic defect - present	SMB 73	35	35 to 45	< 23.5	M	lingual	whole skull	1	0	1		N/A		N/A	0	N/A	N/A	0	1	1		N/A		0	N/A	N/A	0	1	1	1		0		0	N/A	N/A	N/A	1	0	1		0		0	N/A	N/A
AG	1	L.v micro-CT	Enamel hypoplastic defect - type -linear	SMB 73	35	35 to 45	< 23.5	M	labial/buccal	whole skull	1	1	1		N/A		N/A	1	N/A	N/A	1	1	1		N/A		2	N/A	N/A	1	1	1	1		2		0	N/A	N/A	N/A	1	2	2		1		1	N/A	N/A
AG	1	L.v micro-CT	Enamel hypoplastic defect - type -linear	SMB 73	35	35 to 45	< 23.5	M	lingual	whole skull	2	0	2		N/A		N/A	0	N/A	N/A	0	2	2		N/A		0	N/A	N/A	1	1	1	2		0		0	N/A	N/A	N/A	1	0	2		0		0	N/A	N/A
AG	1	L.v micro-CT	Enamel hypoplastic defects-number of lines	SMB 73	35	35 to 45	< 23.5	M	labial/buccal	whole skull	2	1	1		N/A		N/A	2	N/A	N/A	1	1	3		N/A		0	N/A	N/A	1	2	2	1		0		0	N/A	N/A	N/A	1	0	0		1		1	N/A	N/A
AG	1	L.v micro-CT	Enamel hypoplastic defects-number of lines	SMB 73	35	35 to 45	< 23.5	M	lingual	whole skull	0	0	0		N/A		N/A	0	N/A	N/A	0	0	0		N/A		0	N/A	N/A	1	2	2	0		0		0	N/A	N/A	N/A	2	0	0		0		0	N/A	N/A
AG	1	L.v micro-CT	Enamel hypoplastic defect - type - pits	SMB 73	35	35 to 45	< 23.5	M	labial/buccal	whole skull	1	2	1		N/A		N/A	1	N/A	N/A	2	1	1		N/A		1	N/A	N/A	1	1	1	1		1		0	N/A	N/A	N/A	1	1	1		1		2	N/A	N/A
AG	1	L.v micro-CT	Enamel hypoplastic defect - type - pits	SMB 73	35	35 to 45	< 23.5	M	lingual	whole skull	1	0	1		N/A		N/A	0	N/A	N/A	0	1	1		N/A		0	N/A	N/A	2	2	2	1		0		0	N/A	N/A	N/A	0	0	1		0		0	N/A	N/A
AG	1	L.v micro-CT	Enamel hypoplastic defects-number of pits	SMB 73	35	35 to 45	< 23.5	M	labial/buccal	whole skull	1	0	2		N/A		N/A	2	N/A	N/A	0	1	2		N/A		1	N/A	N/A	1	1	2	2		1		0	N/A	N/A	N/A	2	2	2		2		0	N/A	N/A
AG	1	L.v micro-CT	Enamel hypoplastic defects-number of pits	SMB 73	35	35 to 45	< 23.5	M	lingual	whole skull	1	0	0		N/A		N/A	0	N/A	N/A	0	2	2		N/A		0	N/A	N/A	0	0	0	2		0		0	N/A	N/A	N/A	0	0	2		0		0	N/A	N/A
AG	1	L.v micro-CT	Enamel hypoplastic defect - measurement 1 (mm)	SMB 73	35	35 to 45	< 23.5	M	labial/buccal	whole skull	3.04	1.9	0.88		N/A		N/A	1.08	N/A	N/A	3.45	5.41	1.65		N/A		4.97	N/A	N/A	1.89	2.35	2.89	3.74		3		0	N/A	N/A	N/A	2.11	3.06	2.66		1.72		2.5	N/A	N/A
AG	1	L.v micro-CT	Enamel hypoplastic defect - measurement 1 (mm)	SMB 73	35	35 to 45	< 23.5	M	lingual	whole skull	2.11	0	4.1		N/A		N/A	0	N/A	N/A	0	2.02	1.93		N/A		0	N/A	N/A	1.63	1.69	2.81	3.35		0		0	N/A	N/A	N/A	2.7	0	2.52		0		0	N/A	N/A
AG	1	L.v micro-CT	Enamel hypoplastic defect - measurement 2 (mm)	SMB 73	35	35 to 45	< 23.5	M	labial/buccal	whole skull	4.15	0	2.36		N/A		N/A	2.46	N/A	N/A	0	3.25	1.72		N/A		0	N/A	N/A	1.89	4.11	4.74	3.74		3.79		0	N/A	N/A	N/A	3.66	4.78	0		2.55		0	N/A	N/A
AG	1	L.v micro-CT	Enamel hypoplastic defect - measurement 2 (mm)	SMB 73	35	35 to 45	< 23.5	M	lingual	whole skull	0	0	0		N/A		N/A	0	N/A	N/A	0	0	0		N/A		0	N/A	N/A	0	3.44	4.6	0		0		0	N/A	N/A	N/A	3.23	0	0		0		0	N/A	N/A
AG	1	L.v micro-CT	Enamel hypoplastic defect - measurement 3 (mm)	SMB 73	35	35 to 45	< 23.5	M	labial/buccal	whole skull	5.9	0	0		N/A		N/A	2.54	N/A	N/A	0	0	2.98		N/A		0	N/A	N/A	0	4.55	4.74	0		0		0	N/A	N/A	N/A	0	0	0		0		0	N/A	N/A
AG	1	L.v micro-CT	Enamel hypoplastic defect - measurement 3 (mm)	SMB 73	35	35 to 45	< 23.5	M	lingual	whole skull	0	0	0		N/A		N/A	0	N/A	N/A	0	0	0		N/A		0	N/A	N/A	0	0	0	0		0		0	N/A	N/A	N/A	0	0	0		0		0	N/A	N/A
AG	1	L.v micro-CT	Enamel hypoplastic defect - measurement 4 (mm)	SMB 73	35	35 to 45	< 23.5	M	labial/buccal	whole skull	0	0	0		N/A		N/A	0	N/A	N/A	0	0	4.6		N/A		0	N/A	N/A	0	0	0	0		0		0	N/A	N/A	N/A	0	0	0		0		0	N/A	N/A
AG	1	L.v micro-CT	Enamel hypoplastic defect - measurement 4 (mm)	SMB 73	35	35 to 45	< 23.5	M	lingual	whole skull	0	0	0		N/A		N/A	0	N/A	N/A	0	0	0		N/A		0	N/A	N/A	0	0	0	0		0		0	N/A	N/A	N/A	0	0	0		0		0	N/A	N/A
AG	1	L.v micro-CT	IGD - present	SMB 73	35	35 to 45	< 23.5	M	internal	whole skull	0	0	1		N/A		N/A	0	N/A	N/A	0	0	0		N/A		0	N/A	N/A	0	1	1	1		0		0	N/A	N/A	N/A	1	1	1		0		0	N/A	N/A
AG	1	S.v micro-CT	Inventory	SMB 73	35	35 to 45		M	labial/buccal	Individual tooth samples
AG	1	S.v micro-CT	Tooth Wear	SMB 73	35	35 to 45		M	occlusal	Individual tooth samples	4	5	N/A		N/A		N/A	3	N/A	N/A	N/A	N/A	4		N/A		3	N/A	N/A	2	N/A	N/A	N/A		N/A		N/A	N/A	N/A	N/A	N/A	N/A	N/A		N/A		N/A	N/A	N/A
AG	1	S.v micro-CT	Dental Trauma	SMB 73	35	35 to 45		M	labial/buccal	Individual tooth samples	1	1	N/A		N/A		N/A	0	N/A	N/A	N/A	N/A	3		N/A		1	N/A	N/A	0	N/A	N/A	N/A		N/A		N/A	N/A	N/A	N/A	N/A	N/A	N/A		N/A		N/A	N/A	N/A
AG	1	S.v micro-CT	Dental Trauma	SMB 73	35	35 to 45		M	lingual	Individual tooth samples	1	1	N/A		N/A		N/A	0	N/A	N/A	N/A	N/A	0		N/A		0	N/A	N/A	0	N/A	N/A	N/A		N/A		N/A	N/A	N/A	N/A	N/A	N/A	N/A		N/A		N/A	N/A	N/A
AG	1	S.v micro-CT	Occlusion	SMB 73	35	35 to 45		M	occlusal	Individual tooth samples
AG	1	S.v micro-CT	Overbite	SMB 73	35	35 to 45		M	occlusal	Individual tooth samples
AG	1	S.v micro-CT	Overjet	SMB 73	35	35 to 45		M	occlusal	Individual tooth samples
AG	1	S.v micro-CT	Caries - present on tooth	SMB 73	35	35 to 45		M	All	Individual tooth samples	0	1						1					0				1			1
AG	1	S.v micro-CT	Caries- location 1	SMB 73	35	35 to 45		M	mesial	Individual tooth samples	0	1						1					0				1			1
AG	1	S.v micro-CT	Caries- location 2	SMB 73	35	35 to 45		M	distal	Individual tooth samples	0	2						2					0				1			2
AG	1	S.v micro-CT	Caries- location 3	SMB 73	35	35 to 45		M	occlusal	Individual tooth samples	0	2						1					0				2			2
AG	1	S.v micro-CT	Caries- location 4	SMB 73	35	35 to 45		M	labial/buccal	Individual tooth samples	0	2						1					0				2			2
AG	1	S.v micro-CT	Caries- location 5	SMB 73	35	35 to 45		M	lingual	Individual tooth samples	0	2						2					0				2			2
AG	1	S.v micro-CT	Caries _ CEJ 1	SMB 73	35	35 to 45		M	labial/buccal	Individual tooth samples	0	2						2					2				0			0
AG	1	S.v micro-CT	Caries _ CEJ 2	SMB 73	35	35 to 45		M	labial/buccal	Individual tooth samples	0	1						1					1				0			0
AG	1	S.v micro-CT	Caries _ CEJ 3	SMB 73	35	35 to 45		M	labial/buccal	Individual tooth samples	0	2						2					2				0			0
AG	1	S.v micro-CT	Caries - Radiolucency	SMB 73	35	35 to 45		M	labial/buccal	Individual tooth samples	0	2						2					2				0			0
AG	1	S.v micro-CT	Alveolar status	SMB 73	35	35 to 45		M	labial/buccal	Individual tooth samples
AG	1	S.v micro-CT	Periodontal disease	SMB 73	35	35 to 45		M	labial/buccal	Individual tooth samples
AG	1	S.v micro-CT	Periodontal disease	SMB 73	35	35 to 45		M	labial/buccal	Individual tooth samples
AG	1	S.v micro-CT	Enamel hypoplastic defect - present	SMB 73	35	35 to 45		M	labial/buccal	Individual tooth samples	1	1						1					1				1			1
AG	1	S.v micro-CT	Enamel hypoplastic defect - present	SMB 73	35	35 to 45		M	lingual	Individual tooth samples	1	1						1					1				0			1
AG	1	S.v micro-CT	Enamel hypoplastic defect - type -linear	SMB 73	35	35 to 45		M	labial/buccal	Individual tooth samples	1	1						2					1				1			1
AG	1	S.v micro-CT	Enamel hypoplastic defect - type -linear	SMB 73	35	35 to 45		M	lingual	Individual tooth samples	2	2						2					2				0			1
AG	1	S.v micro-CT	Enamel hypoplastic defects-number of lines	SMB 73	35	35 to 45		M	labial/buccal	Individual tooth samples	2	3						0					3				2			1
AG	1	S.v micro-CT	Enamel hypoplastic defects-number of lines	SMB 73	35	35 to 45		M	lingual	Individual tooth samples	0	0						0					0				0			1
AG	1	S.v micro-CT	Enamel hypoplastic defect - type - pits	SMB 73	35	35 to 45		M	labial/buccal	Individual tooth samples	1	2						1					1				1			2
AG	1	S.v micro-CT	Enamel hypoplastic defect - type - pits	SMB 73	35	35 to 45		M	lingual	Individual tooth samples	1	1						1					1				0			2
AG	1	S.v micro-CT	Enamel hypoplastic defects-number of pits	SMB 73	35	35 to 45		M	labial/buccal	Individual tooth samples	2	0						2					2				2			0
AG	1	S.v micro-CT	Enamel hypoplastic defects-number of pits	SMB 73	35	35 to 45		M	lingual	Individual tooth samples	2	0						2					2				0			0
AG	1	S.v micro-CT	Enamel hypoplastic defect - measurement 1 (mm)	SMB 73	35	35 to 45		M	labial/buccal	Individual tooth samples	2.71	1.26						1.79					1.68				1.11			2.08
AG	1	S.v micro-CT	Enamel hypoplastic defect - measurement 1 (mm)	SMB 73	35	35 to 45		M	lingual	Individual tooth samples	2.7	2.03						1.12					2.98				0			1.53
AG	1	S.v micro-CT	Enamel hypoplastic defect - measurement 2 (mm)	SMB 73	35	35 to 45		M	labial/buccal	Individual tooth samples	3.86	3.25						0					2.6				1.92			0
AG	1	S.v micro-CT	Enamel hypoplastic defect - measurement 2 (mm)	SMB 73	35	35 to 45		M	lingual	Individual tooth samples	0	0						0					0				0			0
AG	1	S.v micro-CT	Enamel hypoplastic defect - measurement 3 (mm)	SMB 73	35	35 to 45		M	labial/buccal	Individual tooth samples	5.62	5.27						0					4.63				3.62			0
AG	1	S.v micro-CT	Enamel hypoplastic defect - measurement 3 (mm)	SMB 73	35	35 to 45		M	lingual	Individual tooth samples	0	0						0					0				0			0
AG	1	S.v micro-CT	Enamel hypoplastic defect - measurement 4 (mm)	SMB 73	35	35 to 45		M	labial/buccal	Individual tooth samples	0	0						0					3.56				0			0
AG	1	S.v micro-CT	Enamel hypoplastic defect - measurement 4 (mm)	SMB 73	35	35 to 45		M	lingual	Individual tooth samples	0	0						0					0				0			0
AG	1	S.v micro-CT	IGD - present	SMB 73	35	35 to 45		M	internal	Individual tooth samples	1	1						1					1				0			1
AG	2	Macro	Inventory	SMB 73	35	35 to 45	< 23.5	M	labial/buccal	whole skull	2	2	2		4		3	2	3	3	2	2	2		3		2	3	3	2	2	2	2		2		2	3	3	4	2	2	2		2		2	3	3
AG	2	Macro	Tooth Wear	SMB 73	35	35 to 45	< 23.5	M	occlusal	whole skull	4	4	3		N/A		N/A	2	N/A	N/A	4	4	4		N/A		4	N/A	N/A	2	4	4	5		2		4	N/A	N/A	N/A	4	4	3		3		4	N/A	N/A
AG	2	Macro	Dental Trauma	SMB 73	35	35 to 45	< 23.5	M	labial/buccal	whole skull	1	1	1		N/A		N/A	0	N/A	N/A	3	0	0		N/A		0	N/A	N/A	0	0	3	0		0		0	N/A	N/A	N/A	0	0	0		0		0	N/A	N/A
AG	2	Macro	Dental Trauma	SMB 73	35	35 to 45	< 23.5	M	lingual	whole skull	1	0	1		N/A		N/A	0	N/A	N/A	3	0	0		N/A		0	N/A	N/A	0	0	3	0		0		0	N/A	N/A	N/A	0	0	0		0		0	N/A	N/A
AG	2	Macro	Occlusion	SMB 73	35	35 to 45	< 23.5	M	occlusal	whole skull
AG	2	Macro	Overbite	SMB 73	35	35 to 45	< 23.5	M	labial/buccal	whole skull	2	1	1								2	1	0
AG	2	Macro	Overjet	SMB 73	35	35 to 45	< 23.5	M	labial/buccal	whole skull	2	2	1								3	2	0.5
AG	2	Macro	Caries - present on tooth	SMB 73	35	35 to 45	< 23.5	M	All	whole skull	0	1	1		N/A		N/A	1	N/A	N/A	1	1	1		N/A		1	N/A	N/A	1	1	1	1		1		1	N/A	N/A	N/A	1	1	1		0		1	N/A	N/A
AG	2	Macro	Caries- location 1	SMB 73	35	35 to 45	< 23.5	M	mesial	whole skull	0	1	1		N/A		N/A	1	N/A	N/A	2	1	1		N/A		1	N/A	N/A	1	1	1	1		2		2	N/A	N/A	N/A	1	2	1		0		2	N/A	N/A
AG	2	Macro	Caries- location 2	SMB 73	35	35 to 45	< 23.5	M	distal	whole skull	0	1	2		N/A		N/A	1	N/A	N/A	1	1	1		N/A		1	N/A	N/A	1	1	1	1		2		2	N/A	N/A	N/A	1	1	1		0		2	N/A	N/A
AG	2	Macro	Caries- location 3	SMB 73	35	35 to 45	< 23.5	M	occlusal	whole skull	0	2	2		N/A		N/A	1	N/A	N/A	2	2	2		N/A		2	N/A	N/A	1	2	2	2		1		1	N/A	N/A	N/A	2	2	2		0		1	N/A	N/A
AG	2	Macro	Caries- location 4	SMB 73	35	35 to 45	< 23.5	M	labial/buccal	whole skull	0	2	2		N/A		N/A	2	N/A	N/A	2	1	0		N/A		2	N/A	N/A	2	2	1	1		1		2	N/A	N/A	N/A	2	2	2		0		2	N/A	N/A
AG	2	Macro	Caries- location 5	SMB 73	35	35 to 45	< 23.5	M	lingual	whole skull	0	2	2		N/A		N/A	1	N/A	N/A	2	2	0		N/A		1	N/A	N/A	2	2	2	2		2		1	N/A	N/A	N/A	2	2	2		0		2	N/A	N/A
AG	2	Macro	Caries _ CEJ 1	SMB 73	35	35 to 45	< 23.5	M	labial/buccal	whole skull	0	2	1		N/A		N/A	2	N/A	N/A	2	1	2		N/A		1	N/A	N/A	1	2	1	2		2		2	N/A	N/A	N/A	2	2	2		0		1	N/A	N/A
AG	2	Macro	Caries _ CEJ 2	SMB 73	35	35 to 45	< 23.5	M	labial/buccal	whole skull	0	1	2		N/A		N/A	1	N/A	N/A	2	1	2		N/A		1	N/A	N/A	2	1	1	1		1		1	N/A	N/A	N/A	1	1	1		0		2	N/A	N/A
AG	2	Macro	Caries _ CEJ 3	SMB 73	35	35 to 45	< 23.5	M	labial/buccal	whole skull	0	2	2		N/A		N/A	1	N/A	N/A	2	2	1		N/A		2	N/A	N/A	1	2	2	2		2		2	N/A	N/A	N/A	2	2	2		0		2	N/A	N/A
AG	2	Macro	Caries - Radiolucency	SMB 73	35	35 to 45	< 23.5	M	labial/buccal	whole skull
AG	2	Macro	Alveolar status	SMB 73	35	35 to 45	< 23.5	M	labial/buccal	whole skull					0		2	2	2	0					2		0	0	0	0					3		2	0	0	0					3		3	0	0
AG	2	Macro	Periodontal disease	SMB 73	35	35 to 45	< 23.5	M	labial/buccal	whole skull	3	4	3		N/A		N/A	6	N/A	N/A	3	4	5		N/A		3	N/A	4	N/A	5	6	5		4		3	N/A	N/A	N/A	6	3	3		4		10	N/A	N/A
AG	2	Macro	Periodontal disease	SMB 73	35	35 to 45	< 23.5	M	lingual	whole skull	2	2	2		N/A		N/A	9	N/A	N/A	2	2	3		N/A		4	N/A	4	N/A	6	6	5		5		4	N/A	N/A	N/A	6	4	3		6		6	N/A	N/A
AG	2	Macro	Enamel hypoplastic defect - present	SMB 73	35	35 to 45	< 23.5	M	labial/buccal	whole skull	1	1	1		N/A		N/A	1	N/A	N/A	1	0	1		N/A		1	N/A	N/A	0	1	1	1		0		0	N/A	N/A	N/A	1	1	1		1		0	N/A	N/A
AG	2	Macro	Enamel hypoplastic defect - present	SMB 73	35	35 to 45	< 23.5	M	lingual	whole skull	0	0	1		N/A		N/A	1	N/A	N/A	0	0	1		N/A		0	N/A	N/A	1	1	1	0		0		0	N/A	N/A	N/A	1	1	0		0		0	N/A	N/A
AG	2	Macro	Enamel hypoplastic defect - type -linear	SMB 73	35	35 to 45	< 23.5	M	labial/buccal	whole skull	1	1	1		N/A		N/A	2	N/A	N/A	1	0	1		N/A		2	N/A	N/A	0	1	1	1		0		0	N/A	N/A	N/A	1	1	1		2		0	N/A	N/A
AG	2	Macro	Enamel hypoplastic defect - type -linear	SMB 73	35	35 to 45	< 23.5	M	lingual	whole skull	0	0	2		N/A		N/A	2	N/A	N/A	0	0	0		N/A		0	N/A	N/A	2	1	1	0		0		0	N/A	N/A	N/A	1	1	0		0		0	N/A	N/A
AG	2	Macro	Enamel hypoplastic defects-number of lines	SMB 73	35	35 to 45	< 23.5	M	labial/buccal	whole skull	2	1	1		N/A		N/A	0	N/A	N/A	2	0	1		N/A		0	N/A	N/A	0	1	1	1		0		0	N/A	N/A	N/A	1	1	1		0		0	N/A	N/A
AG	2	Macro	Enamel hypoplastic defects-number of lines	SMB 73	35	35 to 45	< 23.5	M	lingual	whole skull	0	0	0		N/A		N/A	0	N/A	N/A	0	0	0		N/A		0	N/A	N/A	0	2	2	0		0		0	N/A	N/A	N/A	2	2	0		0		0	N/A	N/A
AG	2	Macro	Enamel hypoplastic defect - type - pits	SMB 73	35	35 to 45	< 23.5	M	labial/buccal	whole skull	1	2	1		N/A		N/A	1	N/A	N/A	1	0	1		N/A		1	N/A	N/A	0	1	1	1		0		0	N/A	N/A	N/A	1	1	1		1		0	N/A	N/A
AG	2	Macro	Enamel hypoplastic defect - type - pits	SMB 73	35	35 to 45	< 23.5	M	lingual	whole skull	0	0	1		N/A		N/A	1	N/A	N/A	0	0	0		N/A		0	N/A	N/A	1	2	2	0		0		0	N/A	N/A	N/A	2	2	0		0		0	N/A	N/A
AG	2	Macro	Enamel hypoplastic defects-number of pits	SMB 73	35	35 to 45	< 23.5	M	labial/buccal	whole skull	2	0	2		N/A		N/A	1	N/A	N/A	2	0	2		N/A		1	N/A	N/A	0	2	2	2		0		0	N/A	N/A	N/A	2	2	2		2		0	N/A	N/A
AG	2	Macro	Enamel hypoplastic defects-number of pits	SMB 73	35	35 to 45	< 23.5	M	lingual	whole skull	0	0	2		N/A		N/A	2	N/A	N/A	0	0	2		N/A		0	N/A	N/A	2	0	0	0		0		0	N/A	N/A	N/A	0	0	2		0		0	N/A	N/A
AG	2	Macro	Enamel hypoplastic defect - measurement 1 (mm)	SMB 73	35	35 to 45	< 23.5	M	labial/buccal	whole skull	3	3	4		N/A		N/A	1	N/A	N/A	3.5	0	4		N/A		5	N/A	N/A	0	3	3	4		0		0	N/A	N/A	N/A	3	3	3		2		0	N/A	N/A
AG	2	Macro	Enamel hypoplastic defect - measurement 1 (mm)	SMB 73	35	35 to 45	< 23.5	M	lingual	whole skull	0	0	3		N/A		N/A	1	N/A	N/A	0	0	2		N/A		0	N/A	N/A	3	1	2	0		0		0	N/A	N/A	N/A	1	1	0		0		0	N/A	N/A
AG	2	Macro	Enamel hypoplastic defect - measurement 2 (mm)	SMB 73	35	35 to 45	< 23.5	M	labial/buccal	whole skull	4	0	3		N/A		N/A	0	N/A	N/A	5	0	4		N/A		0	N/A	N/A	0	5	4	5		0		0	N/A	N/A	N/A	4	4	3		0		0	N/A	N/A
AG	2	Macro	Enamel hypoplastic defect - measurement 2 (mm)	SMB 73	35	35 to 45	< 23.5	M	lingual	whole skull	0	0	4		N/A		N/A	0	N/A	N/A	0	0	0		N/A		0	N/A	N/A	0	3	4	0		0		0	N/A	N/A	N/A	3	2	0		0		0	N/A	N/A
AG	2	Macro	Enamel hypoplastic defect - measurement 3 (mm)	SMB 73	35	35 to 45	< 23.5	M	labial/buccal	whole skull	6	0	0		N/A		N/A	0	N/A	N/A	6	0	0		N/A		0	N/A	N/A	0	0	0	0		0		0	N/A	N/A	N/A	0	0	0		0		0	N/A	N/A
AG	2	Macro	Enamel hypoplastic defect - measurement 3 (mm)	SMB 73	35	35 to 45	< 23.5	M	lingual	whole skull	0	0	0		N/A		N/A	0	N/A	N/A	0	0	0		N/A		0	N/A	N/A	0	0	0	0		0		0	N/A	N/A	N/A	0	0	0		0		0	N/A	N/A
AG	2	Macro	Enamel hypoplastic defect - measurement 4 (mm)	SMB 73	35	36 to 45	< 23.5	M	labial/buccal	whole skull	0	0	0		N/A		N/A	0	N/A	N/A	0	0	0		N/A		0	N/A	N/A	0	0	0	0		0		0	N/A	N/A	N/A	0	0	0		0		0	N/A	N/A
AG	2	Macro	Enamel hypoplastic defect - measurement 4 (mm)	SMB 73	35	37 to 45	< 23.5	M	lingual	whole skull	0	0	0		N/A		N/A	0	N/A	N/A	0	0	0		N/A		0	N/A	N/A	0	0	0	0		0		0	N/A	N/A	N/A	0	0	0		0		0	N/A	N/A
AG	2	Macro	IGD - present	SMB 73	35	35 to 45	< 23.5	M	internal	whole skull
AG	2	Radiographic	Inventory	SMB 73	35	35 to 45	< 23.5	M	labial/buccal	whole skull	2	2	2		3		3	2	3	3	2	2	2		3		2	3	3	2	2	2	2		2		2	3	3	3	2	2	2		2		2	3	3
AG	2	Radiographic	Tooth Wear	SMB 73	35	35 to 45	< 23.5	M	occlusal	whole skull	4	4	4		N/A		N/A	4		N/A	4	4	4		N/A		4	N/A	N/A	4	4	4	4		4		4	N/A	N/A	N/A	4	4	4		4		4	N/A	N/A
AG	2	Radiographic	Dental Trauma	SMB 73	35	35 to 45	< 23.5	M	labial/buccal	whole skull	0	0	0		N/A		N/A	N/A	3*	N/A	3*	0	0		N/A		0	N/A	N/A	0	0	0	0		0		0	N/A	N/A	N/A	0	3*	0		0		0	N/A	N/A
AG	2	Radiographic	Dental Trauma	SMB 73	35	35 to 45	< 23.5	M	lingual	whole skull
AG	2	Radiographic	Occlusion	SMB 73	35	35 to 45	< 23.5	M	Occlusal	whole skull
AG	2	Radiographic	Overbite	SMB 73	35	35 to 45	< 23.5	M	occlusal	whole skull
AG	2	Radiographic	Overjet	SMB 73	35	35 to 45	< 23.5	M	occlusal	whole skull
AG	2	Radiographic	Caries - present on tooth	SMB 73	35	35 to 45	< 23.5	M	All	whole skull	0	1	1		N/A		N/A	1	N/A	N/A	0	1	0		N/A		0	N/A	N/A	1	1	1	1		0		1	N/A	N/A	N/A	1	1	0		0		0	N/A	N/A
AG	2	Radiographic	Caries- location 1	SMB 73	35	35 to 45	< 23.5	M	mesial	whole skull	0	1	1		N/A		N/A	2	N/A	N/A	0	1	0		N/A		0	N/A	N/A	1	1	2	1		0		2	N/A	N/A	N/A	1	2	0		0		0	N/A	N/A
AG	2	Radiographic	Caries- location 2	SMB 73	35	35 to 45	< 23.5	M	distal	whole skull	1	1	2		N/A		N/A	1	N/A	N/A	0	1	0		N/A		0	N/A	N/A	1	2	1	2		0		2	N/A	N/A	N/A	2	1	0		0		0	N/A	N/A
AG	2	Radiographic	Caries- location 3	SMB 73	35	35 to 45	< 23.5	M	occlusal	whole skull
AG	2	Radiographic	Caries- location 4	SMB 73	35	35 to 45	< 23.5	M	labial/buccal	whole skull
AG	2	Radiographic	Caries- location 5	SMB 73	35	35 to 45	< 23.5	M	lingual	whole skull
AG	2	Radiographic	Caries _ CEJ 1	SMB 73	35	35 to 45	< 23.5	M	labial/buccal	whole skull	0	2	2		N/A		N/A	2	N/A	N/A	0	2	0		N/A		0	N/A	N/A	2	2	2	2		0		2	N/A	N/A	N/A	2	2	0		0		0	N/A	N/A
AG	2	Radiographic	Caries _ CEJ 2	SMB 73	35	35 to 45	< 23.5	M	labial/buccal	whole skull	0	1	2		N/A		N/A	2	N/A	N/A	0	1	0		N/A		0	N/A	N/A	2	1	1	1		0		1	N/A	N/A	N/A	1	1	0		0		0	N/A	N/A
AG	2	Radiographic	Caries _ CEJ 3	SMB 73	35	35 to 45	< 23.5	M	labial/buccal	whole skull	0	2	1		N/A		N/A	1	N/A	N/A	0	2	0		N/A		1	N/A	N/A	2	2	2	2		0		2	N/A	N/A	N/A	2	2	0		0		0	N/A	N/A
AG	2	Radiographic	Caries - Radiolucency	SMB 73	35	35 to 45	< 23.5	M	labial/buccal	whole skull	0	2	3		N/A		N/A	4	N/A	N/A	0	2	0		N/A		0	N/A	N/A	1	2	2	2		0		2	N/A	N/A	N/A	2	2	0		0		0	N/A	N/A
AG	2	Radiographic	Alveolar status	SMB 73	35	35 to 45	< 23.5	M	labial/buccal	whole skull
AG	2	Radiographic	Periodontal disease	SMB 73	35	35 to 45	< 23.5	M	labial/buccal	whole skull
AG	2	Radiographic	Periodontal disease	SMB 73	35	35 to 45	< 23.5	M	lingual	whole skull
AG	2	Radiographic	Enamel hypoplastic defect - present	SMB 73	35	35 to 45	< 23.5	M	labial/buccal	whole skull
AG	2	Radiographic	Enamel hypoplastic defect - present	SMB 73	35	35 to 45	< 23.5	M	lingual	whole skull
AG	2	Radiographic	Enamel hypoplastic defect - type -linear	SMB 73	35	35 to 45	< 23.5	M	labial/buccal	whole skull
AG	2	Radiographic	Enamel hypoplastic defect - type -linear	SMB 73	35	35 to 45	< 23.5	M	lingual	whole skull
AG	2	Radiographic	Enamel hypoplastic defects-number of lines	SMB 73	35	35 to 45	< 23.5	M	labial/buccal	whole skull
AG	2	Radiographic	Enamel hypoplastic defects-number of lines	SMB 73	35	35 to 45	< 23.5	M	lingual	whole skull
AG	2	Radiographic	Enamel hypoplastic defect - type - pits	SMB 73	35	35 to 45	< 23.5	M	labial/buccal	whole skull
AG	2	Radiographic	Enamel hypoplastic defect - type - pits	SMB 73	35	35 to 45	< 23.5	M	lingual	whole skull
AG	2	Radiographic	Enamel hypoplastic defects-number of pits	SMB 73	35	35 to 45	< 23.5	M	labial/buccal	whole skull
AG	2	Radiographic	Enamel hypoplastic defects-number of pits	SMB 73	35	35 to 45	< 23.5	M	lingual	whole skull
AG	2	Radiographic	Enamel hypoplastic defect - measurement 1 (mm)	SMB 73	35	35 to 45	< 23.5	M	labial/buccal	whole skull
AG	2	Radiographic	Enamel hypoplastic defect - measurement 1 (mm)	SMB 73	35	35 to 45	< 23.5	M	lingual	whole skull
AG	2	Radiographic	Enamel hypoplastic defect - measurement 2 (mm)	SMB 73	35	35 to 45	< 23.5	M	labial/buccal	whole skull
AG	2	Radiographic	Enamel hypoplastic defect - measurement 2 (mm)	SMB 73	35	35 to 45	< 23.5	M	lingual	whole skull
AG	2	Radiographic	Enamel hypoplastic defect - measurement 3 (mm)	SMB 73	35	35 to 45	< 23.5	M	labial/buccal	whole skull
AG	2	Radiographic	Enamel hypoplastic defect - measurement 3 (mm)	SMB 73	35	35 to 45	< 23.5	M	lingual	whole skull
AG	2	Radiographic	Enamel hypoplastic defect - measurement 4 (mm)	SMB 73	35	35 to 45	< 23.5	M	labial/buccal	whole skull
AG	2	Radiographic	Enamel hypoplastic defect - measurement 4 (mm)	SMB 73	35	35 to 45	< 23.5	M	lingual	whole skull
AG	2	Radiographic	IGD - present	SMB 73	35	35 to 45	< 23.5	M	internal	whole skull
AG	2	L.v micro-CT	Inventory	SMB 73	35	35 to 45	< 23.5	M	labial/buccal	whole skull	2	2	2		4		3	2	3	3	2	2	2		3		5	3	3	2	2	2	2		2		2	3	3	3	2	2	2		2		2	3	3
AG	2	L.v micro-CT	Tooth Wear	SMB 73	35	35 to 45	< 23.5	M	occlusal	whole skull	4	4	4		0		0	3	0	0	4	4	4		0		0	0	0	2	5	5	5		3		4	0	0	0	5	5	5		4		3	0	0
AG	2	L.v micro-CT	Dental Trauma	SMB 73	35	35 to 45	< 23.5	M	labial/buccal	whole skull	0	0	0		N/A		N/A	0	N/A	N/A	2	0	0		N/A		0	0	0	N/A	0	0	0		0		0	N/A	N/A	N/A	0	3	0		0		0	N/A	N/A
AG	2	L.v micro-CT	Dental Trauma	SMB 73	35	35 to 45	< 23.5	M	lingual	whole skull	0	0	0		N/A		N/A	0	N/A	N/A	2	0	0		N/A		3	0	0	N/A	0	0	0		0		0	N/A	N/A	N/A	0	3	0		0		0	N/A	N/A
AG	2	L.v micro-CT	Occlusion	SMB 73	35	35 to 45	< 23.5	M	occlusal	whole skull
AG	2	L.v micro-CT	Overbite	SMB 73	35	35 to 45	< 23.5	M	occlusal	whole skull	1.47	1.68	1.37								1.7	1.86	1.7
AG	2	L.v micro-CT	Overjet	SMB 73	35	35 to 45	< 23.5	M	occlusal	whole skull	1.17	2	3.5								1.82	2.1	1.45
AG	2	L.v micro-CT	Caries - present on tooth	SMB 73	35	35 to 45	< 23.5	M	All	whole skull	0	1	1		N/A		N/A	1	N/A	N/A	0	1	1		N/A		1	N/A	N/A	1	1	1	1		1		1	N/A	N/A	N/A	1	1	1		0		1	N/A	N/A
AG	2	L.v micro-CT	Caries- location 1	SMB 73	35	35 to 45	< 23.5	M	mesial	whole skull	0	1	1		N/A		N/A	1	N/A	N/A	0	1	1		N/A		1	N/A	N/A	1	1	1	1		1		2	N/A	N/A	N/A	1	2	2		0		2	N/A	N/A
AG	2	L.v micro-CT	Caries- location 2	SMB 73	35	35 to 45	< 23.5	M	distal	whole skull	0	2	2		N/A		N/A	1	N/A	N/A	0	1	2		N/A		2	N/A	N/A	1	1	1	2		2		1	N/A	N/A	N/A	1	1	2		0		2	N/A	N/A
AG	2	L.v micro-CT	Caries- location 3	SMB 73	35	35 to 45	< 23.5	M	occlusal	whole skull	0	2	2		N/A		N/A	2	N/A	N/A	0	2	2		N/A		2	N/A	N/A	2	2	2	2		2		2	N/A	N/A	N/A	2	2	2		0		1	N/A	N/A
AG	2	L.v micro-CT	Caries- location 4	SMB 73	35	35 to 45	< 23.5	M	labial/buccal	whole skull	0	2	2		N/A		N/A	2	N/A	N/A	0	2	2		N/A		0	N/A	N/A	0	2	2	2		2		2	N/A	N/A	N/A	2	2	1		0		1	N/A	N/A
AG	2	L.v micro-CT	Caries- location 5	SMB 73	35	35 to 45	< 23.5	M	lingual	whole skull	0	2	2		N/A		N/A	2	N/A	N/A	0	2	2		N/A		2	N/A	N/A	0	2	2	2		2		2	N/A	N/A	N/A	2	2	2		0		2	N/A	N/A
AG	2	L.v micro-CT	Caries _ CEJ 1	SMB 73	35	35 to 45	< 23.5	M	labial/buccal	whole skull	0	2	2		N/A		N/A	2	N/A	N/A	0	2	2		N/A		2	N/A	N/A	2	2	1	2		2		2	N/A	N/A	N/A	2	2	2		0		1	N/A	N/A
AG	2	L.v micro-CT	Caries _ CEJ 2	SMB 73	35	35 to 45	< 23.5	M	labial/buccal	whole skull	0	1	1		N/A		N/A	1	N/A	N/A	0	1	1		N/A		1	N/A	N/A	2	1	1	1		1		1	N/A	N/A	N/A	1	1	1		0		1	N/A	N/A
AG	2	L.v micro-CT	Caries _ CEJ 3	SMB 73	35	35 to 45	< 23.5	M	labial/buccal	whole skull	0	2	2		N/A		N/A	1	N/A	N/A	0	2	2		N/A		2	N/A	N/A	1	2	2	2		2		2	N/A	N/A	N/A	2	2	2		0		2	N/A	N/A
AG	2	L.v micro-CT	Caries - Radiolucency	SMB 73	35	35 to 45	< 23.5	M	labial/buccal	whole skull	0	2	1		N/A		N/A	2	N/A	N/A	0	2	2		N/A		2	N/A	N/A	3	2	*,4	2		2		2	N/A	N/A	N/A	3	2	1		0		1	N/A	N/A
AG	2	L.v micro-CT	Alveolar status	SMB 73	35	35 to 45	< 23.5	M	labial/buccal	whole skull					0		0	3	0	0					0		3	0	0	3					4		4	0	0	0					4		4	0	0
AG	2	L.v micro-CT	Periodontal disease	SMB 73	35	35 to 45	< 23.5	M	labial/buccal	whole skull	4.36	4.89	3.65		N/A		N/A	5.65	N/A	N/A	4.53	5.07	4.47		N/A		3.84	N/A	N/A	5.31	4.71	5.25	4.69		4.57		3.62	N/A	N/A	N/A	5.54	3.33	2.91		4.57		4.49	N/A	N/A
AG	2	L.v micro-CT	Periodontal disease	SMB 73	35	35 to 45	< 23.5	M	lingual	whole skull	2.8	2.6	3.42		N/A		N/A	7.36	N/A	N/A	3.19	2.04	3.13		N/A		3.91	N/A	N/A	6.21	6.8	6.06	3.69		4.62		4.88	N/A	N/A	N/A	6.19	4.78	2.46		5.77		5	N/A	N/A
AG	2	L.v micro-CT	Enamel hypoplastic defect - present	SMB 73	35	35 to 45	< 23.5	M	labial/buccal	whole skull	1	1	1		N/A		N/A	1	N/A	N/A	1	1	1		N/A		1	N/A	N/A	1	1	1	1		1		0	N/A	N/A	N/A	1	1	1		1		1	N/A	N/A
AG	2	L.v micro-CT	Enamel hypoplastic defect - present	SMB 73	35	35 to 45	< 23.5	M	lingual	whole skull	1	0	1		N/A		N/A	0	N/A	N/A	0	1	1		N/A		0	N/A	N/A	1	1	1	1		0		0	N/A	N/A	N/A	1	0	1		0		0	N/A	N/A
AG	2	L.v micro-CT	Enamel hypoplastic defect - type -linear	SMB 73	35	35 to 45	< 23.5	M	labial/buccal	whole skull	1	1	1		N/A		N/A	1	N/A	N/A	1	1	1		N/A		1	N/A	N/A	1	1	1	1		2		0	N/A	N/A	N/A	1	2	2		1		1	N/A	N/A
AG	2	L.v micro-CT	Enamel hypoplastic defect - type -linear	SMB 73	35	35 to 45	< 23.5	M	lingual	whole skull	2	0	2		N/A		N/A	0	N/A	N/A	0	2	2		N/A		0	N/A	N/A	1	1	1	2		0		0	N/A	N/A	N/A	1	0	2		0		0	N/A	N/A
AG	2	L.v micro-CT	Enamel hypoplastic defects-number of lines	SMB 73	35	35 to 45	< 23.5	M	labial/buccal	whole skull	2	1	1		N/A		N/A	2	N/A	N/A	1	1	3		N/A		1	N/A	N/A	1	2	2	1		0		0	N/A	N/A	N/A	1	0	0		1		1	N/A	N/A
AG	2	L.v micro-CT	Enamel hypoplastic defects-number of lines	SMB 73	35	35 to 45	< 23.5	M	lingual	whole skull	0	0	0		N/A		N/A	0	N/A	N/A	0	0	0		N/A		0	N/A	N/A	1	2	2	0		0		0	N/A	N/A	N/A	2	0	0		0		0	N/A	N/A
AG	2	L.v micro-CT	Enamel hypoplastic defect - type - pits	SMB 73	35	35 to 45	< 23.5	M	labial/buccal	whole skull	1	2	1		N/A		N/A	1	N/A	N/A	2	2	1		N/A		1	N/A	N/A	2	1	1	1		1		0	N/A	N/A	N/A	1	1	1		1		2	N/A	N/A
AG	2	L.v micro-CT	Enamel hypoplastic defect - type - pits	SMB 73	35	35 to 45	< 23.5	M	lingual	whole skull	1	0	1		N/A		N/A	0	N/A	N/A	0	1	1		N/A		0	N/A	N/A	2	2	2	1		0		0	N/A	N/A	N/A	2	0	1		0		0	N/A	N/A
AG	2	L.v micro-CT	Enamel hypoplastic defects-number of pits	SMB 73	35	35 to 45	< 23.5	M	labial/buccal	whole skull	1	0	2		N/A		N/A	1	N/A	N/A	0	0	2		N/A		2	N/A	N/A	0	1	2	2		1		0	N/A	N/A	N/A	2	2	2		2		0	N/A	N/A
AG	2	L.v micro-CT	Enamel hypoplastic defects-number of pits	SMB 73	35	35 to 45	< 23.5	M	lingual	whole skull	1	0	1		N/A		N/A	0	N/A	N/A	0	2	2		N/A		0	N/A	N/A	0	0	0	2		0		0	N/A	N/A	N/A	0	0	2		0		0	N/A	N/A
AG	2	L.v micro-CT	Enamel hypoplastic defect - measurement 1 (mm)	SMB 73	35	35 to 45	< 23.5	M	labial/buccal	whole skull	3.38	2.39	1.02		N/A		N/A	1.1	N/A	N/A	3.87	4.91	1.6		N/A		1.39	N/A	N/A	2.03	2.36	2.85	3.38		3.09		0	N/A	N/A	N/A	2.4	3.08	3.42		1.9		2.02	N/A	N/A
AG	2	L.v micro-CT	Enamel hypoplastic defect - measurement 1 (mm)	SMB 73	35	35 to 45	< 23.5	M	lingual	whole skull	2.59	0	4.3		N/A		N/A	0	N/A	N/A	0	2.2	2.62		N/A		0	N/A	N/A	1.7	1.83	2.5	3.36		0		0	N/A	N/A	N/A	2.25	0	2.52		0		0	N/A	N/A
AG	2	L.v micro-CT	Enamel hypoplastic defect - measurement 2 (mm)	SMB 73	35	35 to 45	< 23.5	M	labial/buccal	whole skull	4.11	0	2.36		N/A		N/A	2.22	N/A	N/A	0	0	1.9		N/A		3.79	N/A	N/A	0	4.29	4.79	3.89		3.83		0	N/A	N/A	N/A	3.7	4.48	0		2.55		0	N/A	N/A
AG	2	L.v micro-CT	Enamel hypoplastic defect - measurement 2 (mm)	SMB 73	35	35 to 45	< 23.5	M	lingual	whole skull	0	0	0		N/A		N/A	0	N/A	N/A	0	0	0		N/A		0	N/A	N/A	0	3.24	4.28	0		0		0	N/A	N/A	N/A	4.31	0	0		0		0	N/A	N/A
AG	2	L.v micro-CT	Enamel hypoplastic defect - measurement 3 (mm)	SMB 73	35	35 to 45	< 23.5	M	labial/buccal	whole skull	5.37	0	4.65		N/A		N/A	2.8	N/A	N/A	0	0	2.87		N/A		0	N/A	N/A	0	4.46	4.79	0		0		0	N/A	N/A	N/A	0	0	0		0		0	N/A	N/A
AG	2	L.v micro-CT	Enamel hypoplastic defect - measurement 3 (mm)	SMB 73	35	35 to 45	< 23.5	M	lingual	whole skull	0	0	0		N/A		N/A	0	N/A	N/A	0	0	0		N/A		0	N/A	N/A	0	0	0	0		0		0	N/A	N/A	N/A	0	0	0		0		0	N/A	N/A
AG	2	L.v micro-CT	Enamel hypoplastic defect - measurement 4 (mm)	SMB 73	35	35 to 45	< 23.5	M	labial/buccal	whole skull	0	0	0		N/A		N/A	0	N/A	N/A	0	0	4.44		N/A		0	N/A	N/A	0	0	0	0		0		0	N/A	N/A	N/A	0	0	0		0		0	N/A	N/A
AG	2	L.v micro-CT	Enamel hypoplastic defect - measurement 4 (mm)	SMB 73	35	35 to 45	< 23.5	M	lingual	whole skull	0	0	0		N/A		N/A	0	N/A	N/A	0	0	0		N/A		0	N/A	N/A	0	0	0	0		0		0	N/A	N/A	N/A	0	0	0		0		0	N/A	N/A
AG	2	L.v micro-CT	IGD - present	SMB 73	35	35 to 45	< 23.5	M	internal	whole skull	0	0	1		N/A		N/A	0	N/A	N/A	0	0	0		N/A		0	N/A	N/A	0	1	1	1		0		0	N/A	N/A	N/A	1	1	1		0		0	N/A	N/A
AG	2	S.v micro-CT	Inventory	SMB 73	35	35 to 45		M	labial/buccal	Individual tooth samples
AG	2	S.v micro-CT	Tooth Wear	SMB 73	35	35 to 45		M	occlusal	Individual tooth samples	4	5						3					4				3			2
AG	2	S.v micro-CT	Dental Trauma	SMB 73	35	35 to 45		M	labial/buccal	Individual tooth samples	1	1						0					3				1			0
AG	2	S.v micro-CT	Dental Trauma	SMB 73	35	35 to 45		M	lingual	Individual tooth samples	1	1						0					0				0			0
AG	2	S.v micro-CT	Occlusion	SMB 73	35	35 to 45		M	occlusal	Individual tooth samples
AG	2	S.v micro-CT	Overbite	SMB 73	35	35 to 45		M	occlusal	Individual tooth samples
AG	2	S.v micro-CT	Overjet	SMB 73	35	35 to 45		M	occlusal	Individual tooth samples
AG	2	S.v micro-CT	Caries - present on tooth	SMB 73	35	35 to 45		M	All	Individual tooth samples	0	1						1					0				1			1
AG	2	S.v micro-CT	Caries- location 1	SMB 73	35	35 to 45		M	mesial	Individual tooth samples	0	1	N/A		N/A		N/A	1	N/A	N/A	N/A	N/A	0		N/A		1	N/A	N/A	1	N/A	N/A	N/A		N/A		N/A	N/A	N/A	N/A	N/A	N/A	N/A		N/A		N/A	N/A	N/A
AG	2	S.v micro-CT	Caries- location 2	SMB 73	35	35 to 45		M	distal	Individual tooth samples	0	2	N/A		N/A		N/A	2	N/A	N/A	N/A	N/A	0		N/A		1	N/A	N/A	2	N/A	N/A	N/A		N/A		N/A	N/A	N/A	N/A	N/A	N/A	N/A		N/A		N/A	N/A	N/A
AG	2	S.v micro-CT	Caries- location 3	SMB 73	35	35 to 45		M	occlusal	Individual tooth samples	0	2	N/A		N/A		N/A	1	N/A	N/A	N/A	N/A	0		N/A		2	N/A	N/A	2	N/A	N/A	N/A		N/A		N/A	N/A	N/A	N/A	N/A	N/A	N/A		N/A		N/A	N/A	N/A
AG	2	S.v micro-CT	Caries- location 4	SMB 73	35	35 to 45		M	labial/buccal	Individual tooth samples	0	2	N/A		N/A		N/A	2	N/A	N/A	N/A	N/A	0		N/A		2	N/A	N/A	2	N/A	N/A	N/A		N/A		N/A	N/A	N/A	N/A	N/A	N/A	N/A		N/A		N/A	N/A	N/A
AG	2	S.v micro-CT	Caries- location 5	SMB 73	35	35 to 45		M	lingual	Individual tooth samples	0	2	N/A		N/A		N/A	1	N/A	N/A	N/A	N/A	0		N/A		2	N/A	N/A	2	N/A	N/A	N/A		N/A		N/A	N/A	N/A	N/A	N/A	N/A	N/A		N/A		N/A	N/A	N/A
AG	2	S.v micro-CT	Caries _ CEJ 1	SMB 73	35	35 to 45		M	labial/buccal	Individual tooth samples	0	2						2					2				2			2
AG	2	S.v micro-CT	Caries _ CEJ 2	SMB 73	35	35 to 45		M	labial/buccal	Individual tooth samples	0	1						1					1				1			2
AG	2	S.v micro-CT	Caries _ CEJ 3	SMB 73	35	35 to 45		M	labial/buccal	Individual tooth samples	0	2						1					2				2			1
AG	2	S.v micro-CT	Caries - Radiolucency	SMB 73	35	35 to 45		M	labial/buccal	Individual tooth samples	0	2						2					2				2			3
AG	2	S.v micro-CT	Alveolar status	SMB 73	35	35 to 45		M	labial/buccal	Individual tooth samples
AG	2	S.v micro-CT	Periodontal disease	SMB 73	35	35 to 45		M	labial/buccal	Individual tooth samples
AG	2	S.v micro-CT	Periodontal disease	SMB 73	35	35 to 45		M	labial/buccal	Individual tooth samples
AG	2	S.v micro-CT	Enamel hypoplastic defect - present	SMB 73	35	35 to 45		M	labial/buccal	Individual tooth samples	1	1						1					1				1			1
AG	2	S.v micro-CT	Enamel hypoplastic defect - present	SMB 73	35	35 to 45		M	lingual	Individual tooth samples	1	1						1					1				0			1
AG	2	S.v micro-CT	Enamel hypoplastic defect - type -linear	SMB 73	35	35 to 45		M	labial/buccal	Individual tooth samples	1	1						2					1				1			1
AG	2	S.v micro-CT	Enamel hypoplastic defect - type -linear	SMB 73	35	35 to 45		M	lingual	Individual tooth samples	2	2						2					2				0			1
AG	2	S.v micro-CT	Enamel hypoplastic defects-number of lines	SMB 73	35	35 to 45		M	labial/buccal	Individual tooth samples	2	1						0					3				2			1
AG	2	S.v micro-CT	Enamel hypoplastic defects-number of lines	SMB 73	35	35 to 45		M	lingual	Individual tooth samples	0	0						0					0				0			1
AG	2	S.v micro-CT	Enamel hypoplastic defect - type - pits	SMB 73	35	35 to 45		M	labial/buccal	Individual tooth samples	1	2						1					1				1			2
AG	2	S.v micro-CT	Enamel hypoplastic defect - type - pits	SMB 73	35	35 to 45		M	lingual	Individual tooth samples	1	1						1					1				0			2
AG	2	S.v micro-CT	Enamel hypoplastic defects-number of pits	SMB 73	35	35 to 45		M	labial/buccal	Individual tooth samples	2	0						2					2				2			0
AG	2	S.v micro-CT	Enamel hypoplastic defects-number of pits	SMB 73	35	35 to 45		M	lingual	Individual tooth samples	2	2						2					2				0			0
AG	2	S.v micro-CT	Enamel hypoplastic defect - measurement 1 (mm)	SMB 73	35	35 to 45		M	labial/buccal	Individual tooth samples	2.68	3.42						1.39					1.76				1.37			2.08
AG	2	S.v micro-CT	Enamel hypoplastic defect - measurement 1 (mm)	SMB 73	35	35 to 45		M	lingual	Individual tooth samples	2.56	1.91						1.33					2.76				0			1.53
AG	2	S.v micro-CT	Enamel hypoplastic defect - measurement 2 (mm)	SMB 73	35	35 to 45		M	labial/buccal	Individual tooth samples	3.78	0						0					1.76				2			0
AG	2	S.v micro-CT	Enamel hypoplastic defect - measurement 2 (mm)	SMB 73	35	35 to 45		M	lingual	Individual tooth samples	0	0						0					0				0			0
AG	2	S.v micro-CT	Enamel hypoplastic defect - measurement 3 (mm)	SMB 73	35	35 to 45		M	labial/buccal	Individual tooth samples	5.2	0						0					3.14				3.93			0
AG	2	S.v micro-CT	Enamel hypoplastic defect - measurement 3 (mm)	SMB 73	35	35 to 45		M	lingual	Individual tooth samples	0	0						0					0				0			0
AG	2	S.v micro-CT	Enamel hypoplastic defect - measurement 4 (mm)	SMB 73	35	35 to 45		M	labial/buccal	Individual tooth samples	0	0						0					4.75				0			0
AG	2	S.v micro-CT	Enamel hypoplastic defect - measurement 4 (mm)	SMB 73	35	35 to 45		M	lingual	Individual tooth samples	0	0						0					0				0			0
AG	2	S.v micro-CT	IGD - present	SMB 73	35	35 to 45		M	internal	Individual tooth samples	1	1						1					1				0			1
MM	1	Macro	Inventory	SMB 73	35	35 to 45	< 23.5	M	labial/buccal	whole skull	2	2	2		4		3	2	3	3	2	2	2		3		2	3	3	2	2	2	2		2		2	3	3	3	2	2	2		2		2	3	3
MM	1	Macro	Tooth Wear	SMB 73	35	35 to 45	< 23.5	M	occlusal	whole skull	4	4	4		0		0	2	0	0	4	3	4		0		3	0	0	1	4	4	4		2		3	0	0	0	3	3	3		2		2	0	0
MM	1	Macro	Dental Trauma	SMB 73	35	35 to 45	< 23.5	M	labial/buccal	whole skull	0	0	0		N/A		N/A	0	N/A	N/A	2	0	0		N/A		0	N/A	N/A	0	0	0	0		0		0	N/A	N/A	N/A	0	3	0		0		0	N/A	N/A
MM	1	Macro	Dental Trauma	SMB 73	35	35 to 45	< 23.5	M	lingual	whole skull	0	0	0		N/A		N/A	0	N/A	N/A	1	0	0		N/A		0	N/A	N/A	0	0	0	0		0		0	N/A	N/A	N/A	0	3	0		0		0	N/A	N/A
MM	1	Macro	Occlusion	SMB 73	35	35 to 45	< 23.5	M	occlusal	whole skull
MM	1	Macro	Overbite	SMB 73	35	35 to 45	< 23.5	M	labial/buccal	whole skull	2	1	2								2	1	0
MM	1	Macro	Overjet	SMB 73	35	35 to 45	< 23.5	M	labial/buccal	whole skull	6	5	5								3	2	0
MM	1	Macro	Caries - present on tooth	SMB 73	35	35 to 45	< 23.5	M	All	whole skull	0	1	1		N/A		N/A	1	N/A	N/A	1	1	0		N/A		0	N/A	N/A	1	1	1	1		1		1	N/A	N/A	N/A	1	1	0		0		1	N/A	N/A
MM	1	Macro	Caries- location 1	SMB 73	35	35 to 45	< 23.5	M	mesial	whole skull	0	2	1		N/A		N/A	1	N/A	N/A	2	1	0		N/A		0	N/A	N/A	2	1	2	1		2		1	N/A	N/A	N/A	1	2	0		0		2	N/A	N/A
MM	1	Macro	Caries- location 2	SMB 73	35	35 to 45	< 23.5	M	distal	whole skull	0	1	2		N/A		N/A	2	N/A	N/A	1	1	0		N/A		0	N/A	N/A	2	2	1	2		2		2	N/A	N/A	N/A	2	1	0		0		2	N/A	N/A
MM	1	Macro	Caries- location 3	SMB 73	35	35 to 45	< 23.5	M	occlusal	whole skull	0	2	2		N/A		N/A	1	N/A	N/A	2	2	0		N/A		0	N/A	N/A	1	2	2	2		2		2	N/A	N/A	N/A	2	2	0		0		1	N/A	N/A
MM	1	Macro	Caries- location 4	SMB 73	35	35 to 45	< 23.5	M	labial/buccal	whole skull	0	2	2		N/A		N/A	2	N/A	N/A	2	2	0		N/A		0	N/A	N/A	2	2	2	2		1		2	N/A	N/A	N/A	2	2	0		0		2	N/A	N/A
MM	1	Macro	Caries- location 5	SMB 73	35	35 to 45	< 23.5	M	lingual	whole skull	0	2	2		N/A		N/A	2	N/A	N/A	2	2	0		N/A		0	N/A	N/A	2	2	2	2		2		2	N/A	N/A	N/A	2	2	0		0		2	N/A	N/A
MM	1	Macro	Caries _ CEJ 1	SMB 73	35	35 to 45	< 23.5	M	labial/buccal	whole skull	0	1	2		N/A		N/A	1	N/A	N/A	2	2	0		N/A		0	N/A	N/A	1	2	2	2		2		1	N/A	N/A	N/A	2	2	0		0		1	N/A	N/A
MM	1	Macro	Caries _ CEJ 2	SMB 73	35	35 to 45	< 23.5	M	labial/buccal	whole skull	0	2	2		N/A		N/A	2	N/A	N/A	2	2	0		N/A		0	N/A	N/A	2	2	2	2		2		2	N/A	N/A	N/A	2	2	0		0		2	N/A	N/A
MM	1	Macro	Caries _ CEJ 3	SMB 73	35	35 to 45	< 23.5	M	labial/buccal	whole skull	0	1	1		N/A		N/A	1	N/A	N/A	2	1	2		N/A		1	N/A	N/A	1	1	1	2		1		1	N/A	N/A	N/A	1	1	1		0		1	N/A	N/A
MM	1	Macro	Caries - Radiolucency	SMB 73	35	35 to 45	< 23.5	M	labial/buccal	whole skull
MM	1	Macro	Alveolar status	SMB 73	35	35 to 45	< 23.5	M	labial/buccal	whole skull					0		0	2	0	0					0		3	0	0	3					3		3	0	0	0					2		0	0	0
MM	1	Macro	Periodontal disease	SMB 73	35	35 to 45	< 23.5	M	labial/buccal	whole skull	3	4	3		N/A		N/A	6	N/A	N/A	3	4	5		N/A		3	N/A	N/A	4	7	5	4		6		7	N/A	N/A	N/A	5	4	3		5		6	N/A	N/A
MM	1	Macro	Periodontal disease	SMB 73	35	35 to 45	< 23.5	M	lingual	whole skull	2	2	2		N/A		N/A	9	N/A	N/A	2	2	3		N/A		4	N/A	N/A	6	6	6	5		5		6	N/A	N/A	N/A	6	5	3		6		6	N/A	N/A
MM	1	Macro	Enamel hypoplastic defect - present	SMB 73	35	35 to 45	< 23.5	M	labial/buccal	whole skull	1	1	1		N/A		N/A	1	N/A	N/A	1	0	1		N/A		1	N/A	N/A	N/A	1	1	1		0		0	N/A	N/A	N/A	1	0	1		0		0	N/A	N/A
MM	1	Macro	Enamel hypoplastic defect - present	SMB 73	35	35 to 45	< 23.5	M	lingual	whole skull	0	0	0		N/A		N/A	0	N/A	N/A	0	0	0		N/A		0	N/A	N/A	N/A	0	0	0		0		0	N/A	N/A	N/A	0	0	0		0		0	N/A	N/A
MM	1	Macro	Enamel hypoplastic defect - type -linear	SMB 73	35	35 to 45	< 23.5	M	labial/buccal	whole skull	1	1	1		N/A		N/A	2	N/A	N/A	1	0	2		N/A		1	N/A	N/A	N/A	1	1	1		0		0	N/A	N/A	N/A	1	0	2		0		0	N/A	N/A
MM	1	Macro	Enamel hypoplastic defect - type -linear	SMB 73	35	35 to 45	< 23.5	M	lingual	whole skull	0	0	0		N/A		N/A	0	N/A	N/A	0	0	0		N/A		0	N/A	N/A	N/A	0	0	0		0		0	N/A	N/A	N/A	0	0	0		0		0	N/A	N/A
MM	1	Macro	Enamel hypoplastic defects-number of lines	SMB 73	35	35 to 45	< 23.5	M	labial/buccal	whole skull	2	1	1		N/A		N/A	0	N/A	N/A	1	0	0		N/A		1	N/A	N/A	2	2	2	2		0		0	N/A	N/A	N/A	2	0	0		0		0	N/A	N/A
MM	1	Macro	Enamel hypoplastic defects-number of lines	SMB 73	35	35 to 45	< 23.5	M	lingual	whole skull	0	0	0		N/A		N/A	0	N/A	N/A	0	0	0		N/A		0	N/A	N/A	0	0	0	0		0		0	N/A	N/A	N/A	0	0	0		0		0	N/A	N/A
MM	1	Macro	Enamel hypoplastic defect - type - pits	SMB 73	35	35 to 45	< 23.5	M	labial/buccal	whole skull	1	2	1		N/A		N/A	1	N/A	N/A	2	0	1		N/A		2	N/A	N/A	2	2	1	0		0		0	N/A	N/A	N/A	1	0	2		0		0	N/A	N/A
MM	1	Macro	Enamel hypoplastic defect - type - pits	SMB 73	35	35 to 45	< 23.5	M	lingual	whole skull	0	0	0		N/A		N/A	0	N/A	N/A	0	0	1		N/A		0	N/A	N/A	0	0	0	0		0		0	N/A	N/A	N/A	0	0	0		0		0	N/A	N/A
MM	1	Macro	Enamel hypoplastic defects-number of pits	SMB 73	35	35 to 45	< 23.5	M	labial/buccal	whole skull	2	0	2		N/A		N/A	2	N/A	N/A	0	0	2		N/A		0	N/A	N/A	0	0	2	0		0		0	N/A	N/A	N/A	0	0	2		0		0	N/A	N/A
MM	1	Macro	Enamel hypoplastic defects-number of pits	SMB 73	35	35 to 45	< 23.5	M	lingual	whole skull	0	0	0		N/A		N/A	0	N/A	N/A	0	0	0		N/A		0	N/A	N/A	0	0	0	0		0		0	N/A	N/A	N/A	0	0	0		0		0	N/A	N/A
MM	1	Macro	Enamel hypoplastic defect - measurement 1 (mm)	SMB 73	35	35 to 45	< 23.5	M	labial/buccal	whole skull	3	0	1		N/A		N/A	1	N/A	N/A	4	0	2		N/A		2	N/A	N/A	N/A	2	3	3		0		0	N/A	N/A	N/A	2	0	3		0		0	N/A	N/A
MM	1	Macro	Enamel hypoplastic defect - measurement 1 (mm)	SMB 73	35	35 to 45	< 23.5	M	lingual	whole skull	0	0	0		N/A		N/A	0	N/A	N/A	0	0	0		N/A		0	N/A	N/A	N/A	0	0	0		0		0	N/A	N/A	N/A	0	0	0		0		0	N/A	N/A
MM	1	Macro	Enamel hypoplastic defect - measurement 2 (mm)	SMB 73	35	35 to 45	< 23.5	M	labial/buccal	whole skull	5	0	3		N/A		N/A	0	N/A	N/A	0	0	0		N/A		0	N/A	N/A	N/A	5	6	3		0		0	N/A	N/A	N/A	5	0	0		0		0	N/A	N/A
MM	1	Macro	Enamel hypoplastic defect - measurement 2 (mm)	SMB 73	35	35 to 45	< 23.5	M	lingual	whole skull	0	0	0		N/A		N/A	0	N/A	N/A	0	0	0		N/A		0	N/A	N/A	N/A	0	0	0		0		0	N/A	N/A	N/A	0	0	0		0		0	N/A	N/A
MM	1	Macro	Enamel hypoplastic defect - measurement 3 (mm)	SMB 73	35	35 to 45	< 23.5	M	labial/buccal	whole skull	5	0	0		N/A		N/A	0	N/A	N/A	5	0	0		N/A		0	N/A	N/A	N/A	0	0	7		0		0	N/A	N/A	N/A	0	0	0		0		0	N/A	N/A
MM	1	Macro	Enamel hypoplastic defect - measurement 3 (mm)	SMB 73	35	35 to 45	< 23.5	M	lingual	whole skull	0	0	0		N/A		N/A	0	N/A	N/A	0	0	0		N/A		0	N/A	N/A	N/A	0	0	0		0		0	N/A	N/A	N/A	0	0	0		0		0	N/A	N/A
MM	1	Macro	Enamel hypoplastic defect - measurement 4 (mm)	SMB 73	35	36 to 45	< 23.5	M	labial/buccal	whole skull	0	0	0		N/A		N/A	0	N/A	N/A	0	0	0		N/A		0	N/A	N/A	N/A	0	0	0		0		0	N/A	N/A	N/A	0	0	0		0		0	N/A	N/A
MM	1	Macro	Enamel hypoplastic defect - measurement 4 (mm)	SMB 73	35	37 to 45	< 23.5	M	lingual	whole skull	0	0	0		N/A		N/A	0	N/A	N/A	0	0	0		N/A		0	N/A	N/A	N/A	0	0	0		0		0	N/A	N/A	N/A	0	0	0		0		0	N/A	N/A
MM	1	Macro	IGD - present	SMB 73	35	35 to 45	< 23.5	M	internal	whole skull
JW	1	Radiographic	Inventory	SMB 73	35	35 to 45	< 23.5	M	labial/buccal	whole skull	2	2	2		3		3	2	3	3	2	2	2		3		2	3	3	2	2	2	2		2		2	3	3	3	2	2	2		2		2	3	3
JW	1	Radiographic	Tooth Wear	SMB 73	35	35 to 45	< 23.5	M	occlusal	whole skull	4	4	3		N/A		N/A	3	N/A	N/A	4	4	4		N/A		4	N/A	N/A	2	4	4	4		3		3	N/A	N/A	N/A	4	4	3		4		4	N/A	N/A
JW	1	Radiographic	Dental Trauma	SMB 73	35	35 to 45	< 23.5	M	labial/buccal	whole skull	0	0	0		N/A		N/A	0	0	N/A	2	0	0		N/A		0	N/A	N/A	0	0	0	0		0		0	N/A	N/A	N/A	0	2 (F)	0		0		0	N/A	N/A
JW	1	Radiographic	Dental Trauma	SMB 73	35	35 to 45	< 23.5	M	lingual	whole skull
JW	1	Radiographic	Occlusion	SMB 73	35	35 to 45	< 23.5	M	Occlusal	whole skull
JW	1	Radiographic	Overbite	SMB 73	35	35 to 45	< 23.5	M	occlusal	whole skull
JW	1	Radiographic	Overjet	SMB 73	35	35 to 45	< 23.5	M	occlusal	whole skull
DH	1	Radiographic	Caries - present on tooth	SMB 73	35	35 to 45	< 23.5	M	All	whole skull	0	0	0		N/A		N/A	1	1	N/A	0	0	0		N/A		0	N/A	N/A	1	0	1	1		0		0	N/A	N/A	N/A	0	0	0		0		0	N/A	N/A
DH	1	Radiographic	Caries- location 1	SMB 73	35	35 to 45	< 23.5	M	mesial	whole skull	0	0	0		N/A		N/A	2	1	N/A	0	0	0		N/A		0	N/A	N/A	2	0	2	1		0		0	N/A	N/A	N/A	0	0	0		0		0	N/A	N/A
DH	1	Radiographic	Caries- location 2	SMB 73	35	35 to 45	< 23.5	M	distal	whole skull	0	0	0		N/A		N/A	1	2	N/A	0	0	0		N/A		0	N/A	N/A	2	0	2	2		0		0	N/A	N/A	N/A	0	0	0		0		0	N/A	N/A
DH	1	Radiographic	Caries- location 3	SMB 73	35	35 to 45	< 23.5	M	occlusal	whole skull
DH	1	Radiographic	Caries- location 4	SMB 73	35	35 to 45	< 23.5	M	labial/buccal	whole skull
DH	1	Radiographic	Caries- location 5	SMB 73	35	35 to 45	< 23.5	M	lingual	whole skull
DH	1	Radiographic	Caries _ CEJ 1	SMB 73	35	35 to 45	< 23.5	M	labial/buccal	whole skull	0	0	0		N/A		N/A	2	1	N/A	0	0	0		N/A		0	N/A	N/A	1	0	2	2		0		0	N/A	N/A	N/A	0	0	0		0		0	N/A	N/A
DH	1	Radiographic	Caries _ CEJ 2	SMB 73	35	35 to 45	< 23.5	M	labial/buccal	whole skull	0	0	0		N/A		N/A	2	2	N/A	0	0	0		N/A		0	N/A	N/A	2	0	1	1		1		0	N/A	N/A	N/A	0	0	0		0		0	N/A	N/A
DH	1	Radiographic	Caries _ CEJ 3	SMB 73	35	35 to 45	< 23.5	M	labial/buccal	whole skull	0	0	0		N/A		N/A	1	2	N/A	0	0	0		N/A		0	N/A	N/A	2	0	2	2		0		0	N/A	N/A	N/A	0	0	0		0		0	N/A	N/A
DH	1	Radiographic	Caries - Radiolucency	SMB 73	35	35 to 45	< 23.5	M	labial/buccal	whole skull	0	0	0		N/A		N/A	4	4	N/A	0	0	0		N/A		0	N/A	N/A	3	0	3	3		0		0	N/A	N/A	N/A	0	0	0		0		0	N/A	N/A
JW	1	Radiographic	Alveolar status	SMB 73	35	35 to 45	< 23.5	M	labial/buccal	whole skull
JW	1	Radiographic	Periodontal disease	SMB 73	35	35 to 45	< 23.5	M	labial/buccal	whole skull
JW	1	Radiographic	Periodontal disease	SMB 73	35	35 to 45	< 23.5	M	lingual	whole skull
JW	1	Radiographic	Enamel hypoplastic defect - present	SMB 73	35	35 to 45	< 23.5	M	labial/buccal	whole skull
JW	1	Radiographic	Enamel hypoplastic defect - present	SMB 73	35	35 to 45	< 23.5	M	lingual	whole skull
JW	1	Radiographic	Enamel hypoplastic defect - type -linear	SMB 73	35	35 to 45	< 23.5	M	labial/buccal	whole skull
JW	1	Radiographic	Enamel hypoplastic defect - type -linear	SMB 73	35	35 to 45	< 23.5	M	lingual	whole skull
JW	1	Radiographic	Enamel hypoplastic defects-number of lines	SMB 73	35	35 to 45	< 23.5	M	labial/buccal	whole skull
JW	1	Radiographic	Enamel hypoplastic defects-number of lines	SMB 73	35	35 to 45	< 23.5	M	lingual	whole skull
JW	1	Radiographic	Enamel hypoplastic defect - type - pits	SMB 73	35	35 to 45	< 23.5	M	labial/buccal	whole skull
JW	1	Radiographic	Enamel hypoplastic defect - type - pits	SMB 73	35	35 to 45	< 23.5	M	lingual	whole skull
JW	1	Radiographic	Enamel hypoplastic defects-number of pits	SMB 73	35	35 to 45	< 23.5	M	labial/buccal	whole skull
JW	1	Radiographic	Enamel hypoplastic defects-number of pits	SMB 73	35	35 to 45	< 23.5	M	lingual	whole skull
JW	1	Radiographic	Enamel hypoplastic defect - measurement 1 (mm)	SMB 73	35	35 to 45	< 23.5	M	labial/buccal	whole skull
JW	1	Radiographic	Enamel hypoplastic defect - measurement 1 (mm)	SMB 73	35	35 to 45	< 23.5	M	lingual	whole skull
JW	1	Radiographic	Enamel hypoplastic defect - measurement 2 (mm)	SMB 73	35	35 to 45	< 23.5	M	labial/buccal	whole skull
JW	1	Radiographic	Enamel hypoplastic defect - measurement 2 (mm)	SMB 73	35	35 to 45	< 23.5	M	lingual	whole skull
JW	1	Radiographic	Enamel hypoplastic defect - measurement 3 (mm)	SMB 73	35	35 to 45	< 23.5	M	labial/buccal	whole skull
JW	1	Radiographic	Enamel hypoplastic defect - measurement 3 (mm)	SMB 73	35	35 to 45	< 23.5	M	lingual	whole skull
JW	1	Radiographic	Enamel hypoplastic defect - measurement 4 (mm)	SMB 73	35	35 to 45	< 23.5	M	labial/buccal	whole skull
JW	1	Radiographic	Enamel hypoplastic defect - measurement 4 (mm)	SMB 73	35	35 to 45	< 23.5	M	lingual	whole skull
JW	1	Radiographic	IGD - present	SMB 73	35	35 to 45	< 23.5	M	internal	whole skull
MM	1	L.v micro-CT	Inventory	SMB 73	35	35 to 45	< 23.5	M	labial/buccal	whole skull	2	2	2		2		3	2	3	3	2	2	2		3		3	2	3	3	2	2	2		2		2	4	N/A	N/A	2	2	2		2		2	3	N/A
MM	1	L.v micro-CT	Tooth Wear	SMB 73	35	35 to 45	< 23.5	M	occlusal	whole skull	4	4	2		0		0	0	0	0	4	4	0		0		0	0	0	0	3	3	3		2		1	0	0	0	3	3	2		1		1	0	0
MM	1	L.v micro-CT	Dental Trauma	SMB 73	35	35 to 45	< 23.5	M	labial/buccal	whole skull	0	0	0		N/A		N/A	0	0	N/A	2	0	0		N/A		0	N/A	N/A	N/A	0	0	0		0		0	N/A	N/A	N/A	0	3	0		0		0	N/A	N/A
MM	1	L.v micro-CT	Dental Trauma	SMB 73	35	35 to 45	< 23.5	M	lingual	whole skull	0	0	0		N/A		N/A	0	0	N/A	0	0	0		N/A		0	N/A	N/A	N/A	0	0	0		0		0	N/A	N/A	N/A	0	3	0		0		0	N/A	N/A
MM	1	L.v micro-CT	Occlusion	SMB 73	35	35 to 45	< 23.5	M	occlusal	whole skull
MM	1	L.v micro-CT	Overbite	SMB 73	35	35 to 45	< 23.5	M	occlusal	whole skull	1.52	N/A	1.71								0.51	0.72	0.59
MM	1	L.v micro-CT	Overjet	SMB 73	35	35 to 45	< 23.5	M	occlusal	whole skull	N/A	1.31	2.59								1.46	1.94	0.59
MM	1	L.v micro-CT	Caries - present on tooth	SMB 73	35	35 to 45	< 23.5	M	All	whole skull	0	1	0		N/A		0	1	N/A	1	0	0	0		N/A		N/A	N/A	N/A	N/A	1	0	0		0		0	N/A	N/A	N/A	1	1	1		1		1	N/A	N/A
MM	1	L.v micro-CT	Caries- location 1	SMB 73	35	35 to 45	< 23.5	M	mesial	whole skull	0	2	0		N/A		0	1	N/A	1	0	0	0		N/A		N/A	N/A	N/A	N/A	1	0	0		0		0	N/A	N/A	N/A	1	2	1		2		2	N/A	N/A
MM	1	L.v micro-CT	Caries- location 2	SMB 73	35	35 to 45	< 23.5	M	distal	whole skull	0	1	0		N/A		0	2	N/A	2	0	0	0		N/A		N/A	N/A	N/A	N/A	1	0	0		0		0	N/A	N/A	N/A	1	1	2		0		2	N/A	N/A
MM	1	L.v micro-CT	Caries- location 3	SMB 73	35	35 to 45	< 23.5	M	occlusal	whole skull	0	2	2		N/A		N/A	2	N/A	N/A	0	2	2		N/A		0	N/A	N/A	0	2	2	2		2		2	N/A	N/A	N/A	2	2	2		0		1	N/A	N/A
MM	1	L.v micro-CT	Caries- location 4	SMB 73	35	35 to 45	< 23.5	M	labial/buccal	whole skull	0	2	2		N/A		N/A	2	N/A	N/A	0	2	2		N/A		0	N/A	N/A	0	2	2	2		2		2	N/A	N/A	N/A	2	2	1		0		1	N/A	N/A
MM	1	L.v micro-CT	Caries- location 5	SMB 73	35	35 to 45	< 23.5	M	lingual	whole skull	0	2	2		N/A		N/A	2	N/A	N/A	0	2	2		N/A		0	N/A	N/A	0	2	2	2		2		2	N/A	N/A	N/A	2	2	2		0		2	N/A	N/A
MM	1	L.v micro-CT	Caries _ CEJ 1	SMB 73	35	35 to 45	< 23.5	M	labial/buccal	whole skull	0	2	0		N/A		0	2	N/A	1	0	0	0		N/A		N/A	N/A	N/A	N/A	2	0	0		0		0	N/A	N/A	N/A	2	2	2		2		2	N/A	N/A
MM	1	L.v micro-CT	Caries _ CEJ 2	SMB 73	35	35 to 45	< 23.5	M	labial/buccal	whole skull	0	1	0		N/A		0	1	N/A	N/A	0	0	0		N/A		N/A	N/A	N/A	N/A	1	0	0		0		0	N/A	N/A	N/A	1	1	1		1		1	N/A	N/A
MM	1	L.v micro-CT	Caries _ CEJ 3	SMB 73	35	35 to 45	< 23.5	M	labial/buccal	whole skull	0	2	0		N/A		0	2	N/A	2	0	0	2		N/A		N/A	N/A	N/A	N/A	2	0	0		0		0	N/A	N/A	N/A	2	2	2		2		2	N/A	N/A
MM	1	L.v micro-CT	Caries - Radiolucency	SMB 73	35	35 to 45	< 23.5	M	labial/buccal	whole skull	0	3	0		N/A		0	3	N/A	2	0	0	0		N/A		N/A	N/A			3	0	0		0		0	N/A	N/A	N/A	4	3	3		0		0	N/A	N/A
MM	1	L.v micro-CT	Alveolar status	SMB 73	35	35 to 45	< 23.5	M	labial/buccal	whole skull					0		0	0	0	0					0		3	N/A	0	3					3		3	0	0	0					2		0	0	0
MM	1	L.v micro-CT	Periodontal disease	SMB 73	35	35 to 45	< 23.5	M	labial/buccal	whole skull	3.98	5.56	3.28		N/A		N/A	4.93	N/A	N/A	4.5	3.96	4.17		N/A		4.35	N/A	N/A	5.69	5.01	5.56	4.04		4.54		3.95	N/A	N/A	N/A	4.96	3.23	3.22		4.73		4.54	N/A	N/A
MM	1	L.v micro-CT	Periodontal disease	SMB 73	35	35 to 45	< 23.5	M	lingual	whole skull	2.99	2.57	2.95		N/A		N/A	10.04	N/A	N/A	2.27	2.26	2.09		N/A		4.01	N/A	N/A	5.83	6.5	5.18	4.25		4.84		4.34	N/A	N/A	N/A	5.82	4.59	2.63		6.08		5.08	N/A	N/A
MM	1	L.v micro-CT	Enamel hypoplastic defect - present	SMB 73	35	35 to 45	< 23.5	M	labial/buccal	whole skull	1	1	1		N/A		N/A	1	N/A	N/A	1	0	1		N/A		0	N/A	N/A	0	1	1	1		1		0	N/A	N/A	N/A	1	1	1		1		0	N/A	N/A
MM	1	L.v micro-CT	Enamel hypoplastic defect - present	SMB 73	35	35 to 45	< 23.5	M	lingual	whole skull	0	0	0		N/A		N/A	0	N/A	N/A	0	0	1		N/A		0	N/A	N/A	0	0	0	0		0		0	N/A	N/A	N/A	0	0	0		0		0	N/A	N/A
MM	1	L.v micro-CT	Enamel hypoplastic defect - type -linear	SMB 73	35	35 to 45	< 23.5	M	labial/buccal	whole skull	1	1	1		N/A		N/A	1	N/A	N/A	1	0	1		N/A		0	N/A	N/A	0	1	1	2		2		0	N/A	N/A	N/A	1	1	2		2		0	N/A	N/A
MM	1	L.v micro-CT	Enamel hypoplastic defect - type -linear	SMB 73	35	35 to 45	< 23.5	M	lingual	whole skull	0	0	0		N/A		N/A	0	N/A	N/A	0	0	2		N/A		0	N/A	N/A	0	0	0	0		0		0	N/A	N/A	N/A	0	0	0		0		0	N/A	N/A
MM	1	L.v micro-CT	Enamel hypoplastic defects-number of lines	SMB 73	35	35 to 45	< 23.5	M	labial/buccal	whole skull	1	1	1		N/A		N/A	1	N/A	N/A	1	0	1		N/A		0	N/A	N/A	0	1	1	0		0		0	N/A	N/A	N/A	1	1	0		0		0	N/A	N/A
MM	1	L.v micro-CT	Enamel hypoplastic defects-number of lines	SMB 73	35	35 to 45	< 23.5	M	lingual	whole skull	0	0	0		N/A		N/A	0	N/A	N/A	0	0	0		N/A		0	N/A	N/A	0	0	0	0		0		0	N/A	N/A	N/A	0	0	0		0		0	N/A	N/A
MM	1	L.v micro-CT	Enamel hypoplastic defect - type - pits	SMB 73	35	35 to 45	< 23.5	M	labial/buccal	whole skull	2	2	1		N/A		N/A	1	N/A	N/A	2	0	1		N/A		0	N/A	N/A	0	2	2	1		1		0	N/A	N/A	N/A	2	1	1		1		0	N/A	N/A
MM	1	L.v micro-CT	Enamel hypoplastic defect - type - pits	SMB 73	35	35 to 45	< 23.5	M	lingual	whole skull	0	0	0		N/A		N/A	0	N/A	N/A	0	0	1		N/A		0	N/A	N/A	0	0	0	0		0		0	N/A	N/A	N/A	0	0	0		0		0	N/A	N/A
MM	1	L.v micro-CT	Enamel hypoplastic defects-number of pits	SMB 73	35	35 to 45	< 23.5	M	labial/buccal	whole skull	0	0	2		N/A		N/A	1	N/A	N/A	0	0	2		N/A		0	N/A	N/A	0	0	0	2		2		0	N/A	N/A	N/A	0	2	2		2		0	N/A	N/A
MM	1	L.v micro-CT	Enamel hypoplastic defects-number of pits	SMB 73	35	35 to 45	< 23.5	M	lingual	whole skull	0	0	0		N/A		N/A	0	N/A	N/A	0	0	2		N/A		0	N/A	N/A	0	0	0	0		0		0	N/A	N/A	N/A	0	0	0		0		0	N/A	N/A
MM	1	L.v micro-CT	Enamel hypoplastic defect - measurement 1 (mm)	SMB 73	35	35 to 45	< 23.5	M	labial/buccal	whole skull	3.46	2.59	0.75		N/A		N/A	1.91	N/A	N/A	4.2	0	2.2		N/A		0	N/A	N/A	0	2.46	2.96	3.61		2.6		0	N/A	N/A	N/A	2.11	2.51	3.13		1.83		0	N/A	N/A
MM	1	L.v micro-CT	Enamel hypoplastic defect - measurement 1 (mm)	SMB 73	35	35 to 45	< 23.5	M	lingual	whole skull	0	0	0		N/A		N/A	0	N/A	N/A	0	0	3.21		N/A		0	N/A	N/A	0	0	0	0		0		0	N/A	N/A	N/A	0	0	0		0		0	N/A	N/A
MM	1	L.v micro-CT	Enamel hypoplastic defect - measurement 2 (mm)	SMB 73	35	35 to 45	< 23.5	M	labial/buccal	whole skull	0	0	2.66		N/A		N/A	1.91	N/A	N/A	0	0	4.75		N/A		0	N/A	N/A	0	0	0	0		0		0	N/A	N/A	N/A	0	2.89	0		0		0	N/A	N/A
MM	1	L.v micro-CT	Enamel hypoplastic defect - measurement 2 (mm)	SMB 73	35	35 to 45	< 23.5	M	lingual	whole skull	0	0	0		N/A		N/A	0	N/A	N/A	0	0	0		N/A		0	N/A	N/A	0	0	0	0		0		0	N/A	N/A	N/A	0	0	0		0		0	N/A	N/A
MM	1	L.v micro-CT	Enamel hypoplastic defect - measurement 3 (mm)	SMB 73	35	35 to 45	< 23.5	M	labial/buccal	whole skull	0	0	0		N/A		N/A	0	N/A	N/A	0	0	0		N/A		0	N/A	N/A	0	0	0	0		0		0	N/A	N/A	N/A	0	0	0		0		0	N/A	N/A
MM	1	L.v micro-CT	Enamel hypoplastic defect - measurement 3 (mm)	SMB 73	35	35 to 45	< 23.5	M	lingual	whole skull	0	0	0		N/A		N/A	0	N/A	N/A	0	0	0		N/A		0	N/A	N/A	0	0	0	0		0		0	N/A	N/A	N/A	0	0	0		0		0	N/A	N/A
MM	1	L.v micro-CT	Enamel hypoplastic defect - measurement 4 (mm)	SMB 73	35	35 to 45	< 23.5	M	labial/buccal	whole skull	0	0	0		N/A		N/A	0	N/A	N/A	0	0	0		N/A		0	N/A	N/A	0	0	0	0		0		0	N/A	N/A	N/A	0	0	0		0		0	N/A	N/A
MM	1	L.v micro-CT	Enamel hypoplastic defect - measurement 4 (mm)	SMB 73	35	35 to 45	< 23.5	M	lingual	whole skull	0	0	0		N/A		N/A	0	N/A	N/A	0	0	0		N/A		0	N/A	N/A	0	0	0	0		0		0	N/A	N/A	N/A	0	0	0		0		0	N/A	N/A
MM	1	L.v micro-CT	IGD - present	SMB 73	35	35 to 45	< 23.5	M	internal	whole skull	0	0	0		N/A		N/A	0	N/A	N/A	0	0	0		N/A		0	N/A	N/A	N/A	1	1	1		0		0	N/A	N/A	N/A	1	1	1		0		0	N/A	N/A
MM	1	S.v micro-CT	Inventory	SMB 73	35	35 to 45		M	labial/buccal	Individual tooth samples
MM	1	S.v micro-CT	Tooth Wear	SMB 73	35	35 to 45		M	occlusal	Individual tooth samples	5	5						3					4				3			1
MM	1	S.v micro-CT	Dental Trauma	SMB 73	35	35 to 45		M	labial/buccal	Individual tooth samples	1	0						3					0				0			0
MM	1	S.v micro-CT	Dental Trauma	SMB 73	35	35 to 45		M	lingual	Individual tooth samples	1	0						3					0				0			0
MM	1	S.v micro-CT	Occlusion	SMB 73	35	35 to 45		M	occlusal	Individual tooth samples
MM	1	S.v micro-CT	Overbite	SMB 73	35	35 to 45		M	occlusal	Individual tooth samples
MM	1	S.v micro-CT	Overjet	SMB 73	35	35 to 45		M	occlusal	Individual tooth samples
MM	1	S.v micro-CT	Caries - present on tooth	SMB 73	35	35 to 45		M	All	Individual tooth samples	0	0						2					0				1			1
MM	1	S.v micro-CT	Caries- location 1	SMB 73	35	35 to 45		M	mesial	Individual tooth samples	0	0						1					0				0			1
MM	1	S.v micro-CT	Caries- location 2	SMB 73	35	35 to 45		M	distal	Individual tooth samples	0	0						2					0				0			2
MM	1	S.v micro-CT	Caries- location 3	SMB 73	35	35 to 45		M	occlusal	Individual tooth samples	0	0						2					0				0			2
MM	1	S.v micro-CT	Caries- location 4	SMB 73	35	35 to 45		M	labial/buccal	Individual tooth samples	0	0						2					0				2			2
MM	1	S.v micro-CT	Caries- location 5	SMB 73	35	35 to 45		M	lingual	Individual tooth samples	0	2						2					0				0			2
MM	1	S.v micro-CT	Caries _ CEJ 1	SMB 73	35	35 to 45		M	labial/buccal	Individual tooth samples	0	2						2		1			0				N/A			N/A
MM	1	S.v micro-CT	Caries _ CEJ 2	SMB 73	35	35 to 45		M	labial/buccal	Individual tooth samples	0	1						1		N/A			0				N/A			N/A
MM	1	S.v micro-CT	Caries _ CEJ 3	SMB 73	35	35 to 45		M	labial/buccal	Individual tooth samples	0	1						2		2			2				N/A			N/A
MM	1	S.v micro-CT	Caries - Radiolucency	SMB 73	35	35 to 45		M	labial/buccal	Individual tooth samples	0	3						3					0				N/A			N/A
MM	1	S.v micro-CT	Alveolar status	SMB 73	35	35 to 45		M	labial/buccal	Individual tooth samples
MM	1	S.v micro-CT	Periodontal disease	SMB 73	35	35 to 45		M	labial/buccal	Individual tooth samples
MM	1	S.v micro-CT	Periodontal disease	SMB 73	35	35 to 45		M	labial/buccal	Individual tooth samples
MM	1	S.v micro-CT	Enamel hypoplastic defect - present	SMB 73	35	35 to 45		M	labial/buccal	Individual tooth samples	1	1						1					1				1			1
MM	1	S.v micro-CT	Enamel hypoplastic defect - present	SMB 73	35	35 to 45		M	lingual	Individual tooth samples	1	1						1					1				1			0
MM	1	S.v micro-CT	Enamel hypoplastic defect - type -linear	SMB 73	35	35 to 45		M	labial/buccal	Individual tooth samples	1	1						2					1				1			1
MM	1	S.v micro-CT	Enamel hypoplastic defect - type -linear	SMB 73	35	35 to 45		M	lingual	Individual tooth samples	2	2						2					2				2			0
MM	1	S.v micro-CT	Enamel hypoplastic defects-number of lines	SMB 73	35	35 to 45		M	labial/buccal	Individual tooth samples	2	1						0					2				2			0
MM	1	S.v micro-CT	Enamel hypoplastic defects-number of lines	SMB 73	35	35 to 45		M	lingual	Individual tooth samples	0	0						0					0				0			0
MM	1	S.v micro-CT	Enamel hypoplastic defect - type - pits	SMB 73	35	35 to 45		M	labial/buccal	Individual tooth samples	1	2						1					1				1			0
MM	1	S.v micro-CT	Enamel hypoplastic defect - type - pits	SMB 73	35	35 to 45		M	lingual	Individual tooth samples	1	1						1					1				0			0
MM	1	S.v micro-CT	Enamel hypoplastic defects-number of pits	SMB 73	35	35 to 45		M	labial/buccal	Individual tooth samples	2	0						2					2				0			0
MM	1	S.v micro-CT	Enamel hypoplastic defects-number of pits	SMB 73	35	35 to 45		M	lingual	Individual tooth samples	2	2						2					0				0			0
MM	1	S.v micro-CT	Enamel hypoplastic defect - measurement 1 (mm)	SMB 73	35	35 to 45		M	labial/buccal	Individual tooth samples	2.4	1.25						1.8					1.55				1.1			2.08
MM	1	S.v micro-CT	Enamel hypoplastic defect - measurement 1 (mm)	SMB 73	35	35 to 45		M	lingual	Individual tooth samples	2.7	2						1					3				0			1.53
MM	1	S.v micro-CT	Enamel hypoplastic defect - measurement 2 (mm)	SMB 73	35	35 to 45		M	labial/buccal	Individual tooth samples	3.68	3.28						0					2.6				1.88			0
MM	1	S.v micro-CT	Enamel hypoplastic defect - measurement 2 (mm)	SMB 73	35	35 to 45		M	lingual	Individual tooth samples	0	0						0					0				0			0
MM	1	S.v micro-CT	Enamel hypoplastic defect - measurement 3 (mm)	SMB 73	35	35 to 45		M	labial/buccal	Individual tooth samples	5.53	5.2						0					3.48				3.58			0
MM	1	S.v micro-CT	Enamel hypoplastic defect - measurement 3 (mm)	SMB 73	35	35 to 45		M	lingual	Individual tooth samples	0	0						0					0				0			0
MM	1	S.v micro-CT	Enamel hypoplastic defect - measurement 4 (mm)	SMB 73	35	35 to 45		M	labial/buccal	Individual tooth samples	0	0						0					4.6				0			0
MM	1	S.v micro-CT	Enamel hypoplastic defect - measurement 4 (mm)	SMB 73	35	35 to 45		M	lingual	Individual tooth samples	0	0						0					0				0			0
MM	1	S.v micro-CT	IGD - present	SMB 73	35	35 to 45		M	internal	Individual tooth samples	1	0						1					0				0			1
AG	1	Macro	Inventory	SMB 66B	30	30 to 40	< 23.5	F	labial/buccal	whole skull	4	2	3		2		2	4	2	4	2	2	2		4		4	3	2	4	2	2	2		2		2	3	3	3	2	2	2		2		3	3	3
AG	1	Macro	Tooth Wear	SMB 66B	30	30 to 40	< 23.5	F	occlusal	whole skull	N/A	2	N/A		3		2	N/A	2	N/A	4	2	3		N/A		N/A	N/A	4	N/A	4	3	3		2		N/A	N/A	N/A	N/A	4	3	3		2		N/A	N/A	N/A
AG	1	Macro	Dental Trauma	SMB 66B	30	30 to 40	< 23.5	F	labial/buccal	whole skull	N/A	0	N/A		0		0	N/A	3	N/A	0	0	1		N/A		N/A	N/A	0	N/A	0	1	1		1		0	0	N/A	N/A	0	0	1		1		0	N/A	N/A
AG	1	Macro	Dental Trauma	SMB 66B	30	30 to 40	< 23.5	F	lingual	whole skull	N/A	0	N/A		0		0	N/A	0	N/A	0	0	0		N/A		N/A	N/A	0	N/A	0	1	1		0		0	0	N/A	N/A	0	1	1		1		0	N/A	N/A
AG	1	Macro	Occlusion	SMB 66B	30	30 to 40	< 23.5	F	occlusal	whole skull
AG	1	Macro	Overbite	SMB 66B	30	30 to 40	< 23.5	F	labial/buccal	whole skull	N/A	3	N/A								2	1	1
AG	1	Macro	Overjet	SMB 66B	30	30 to 40	< 23.5	F	labial/buccal	whole skull	N/A	5	N/A								3	3	1
AG	1	Macro	Caries - present on tooth	SMB 66B	30	30 to 40	< 23.5	F	All	whole skull	N/A	1	N/A		1		1	N/A	1	N/A	1	0	1		N/A		N/A	N/A	1	N/A	1	1	1		1		N/A	N/A	N/A	N/A	1	1	1		1		0	N/A	N/A
AG	1	Macro	Caries- location 1	SMB 66B	30	30 to 40	< 23.5	F	mesial	whole skull	N/A	1	N/A		1		1	N/A	1	N/A	1	0	1		N/A		N/A	N/A	1	N/A	2	2	1		2		N/A	N/A	N/A	N/A	2	2	1		1		0	N/A	N/A
AG	1	Macro	Caries- location 2	SMB 66B	30	30 to 40	< 23.5	F	distal	whole skull	N/A	2	N/A		1		2	N/A	2	N/A	1	0	1		N/A		N/A	N/A	1	N/A	1	2	2		1		N/A	N/A	N/A	N/A	2	1	2		1		0	N/A	N/A
AG	1	Macro	Caries- location 3	SMB 66B	30	30 to 40	< 23.5	F	occlusal	whole skull	N/A	2	N/A		2		2	N/A	1	N/A	2	0	2		N/A		N/A	N/A	1	N/A	2	2	2		2		N/A	N/A	N/A	N/A	2	2	2		2		0	N/A	N/A
AG	1	Macro	Caries- location 4	SMB 66B	30	30 to 40	< 23.5	F	labial/buccal	whole skull	N/A	2	N/A		2		1	N/A	2	N/A	2	0	2		N/A		N/A	N/A	2	N/A	2	1	2		2		N/A	N/A	N/A	N/A	1	2	1		2		0	N/A	N/A
AG	1	Macro	Caries- location 5	SMB 66B	30	30 to 40	< 23.5	F	lingual	whole skull	N/A	1	N/A		2		2	N/A	2	N/A	2	0	2		N/A		N/A	N/A	2	N/A	2	2	2		2		N/A	N/A	N/A	N/A	2	2	2		2		0	N/A	N/A
AG	1	Macro	Caries _ CEJ 1	SMB 66B	30	30 to 40	< 23.5	F	labial/buccal	whole skull	N/A	1	N/A		1		1	N/A	1	N/A	1	0	1		N/A		N/A	N/A	1	N/A	1	2	2		2		N/A	N/A	N/A	N/A	1	1	2		1		0	N/A	N/A
AG	1	Macro	Caries _ CEJ 2	SMB 66B	30	30 to 40	< 23.5	F	labial/buccal	whole skull	N/A	1	N/A		2		2	N/A	2	N/A	2	0	2		N/A		N/A	N/A	2	N/A	1	1	1		1		N/A	N/A	N/A	N/A	2	2	1		1		0	N/A	N/A
AG	1	Macro	Caries _ CEJ 3	SMB 66B	30	30 to 40	< 23.5	F	labial/buccal	whole skull	N/A	1	N/A		1		1	N/A	1	N/A	2	0	2		N/A		N/A	N/A	2	N/A	2	1	2		2		N/A	N/A	N/A	N/A	2	1	1		1		0	N/A	N/A
AG	1	Macro	Caries - Radiolucency	SMB 66B	30	30 to 40	< 23.5	F	labial/buccal	whole skull
AG	1	Macro	Alveolar status	SMB 66B	30	30 to 40	< 23.5	F	labial/buccal	whole skull					2		2	0	2	0					0		0	0	0	0					3		0	0	0	0					4		4	2	0
AG	1	Macro	Periodontal disease	SMB 66B	30	30 to 40	< 23.5	F	labial/buccal	whole skull	N/A	3	N/A		5		4	N/A	N/A	N/A	2	2	4		N/A		N/A	N/A	5	N/A	4	3	7		6		N/A	N/A	N/A	N/A	6	5	8		5		6	N/A	N/A
AG	1	Macro	Periodontal disease	SMB 66B	30	30 to 40	< 23.5	F	lingual	whole skull	N/A	4	N/A		4		4	N/A	8	N/A	3	2	2		N/A		N/A	N/A	7	N/A	6	4	5		3		N/A	N/A	N/A	N/A	6	5	6		3		4	N/A	N/A
AG	1	Macro	Enamel hypoplastic defect - present	SMB 66B	30	30 to 40	< 23.5	F	labial/buccal	whole skull	N/A	0	N/A		0		0	N/A	0	N/A	1	0	1		N/A		N/A	N/A	0	N/A	0	0	0		0		N/A	N/A	N/A	N/A	0	0	0		0		0	N/A	N/A
AG	1	Macro	Enamel hypoplastic defect - present	SMB 66B	30	30 to 40	< 23.5	F	lingual	whole skull	N/A	0	N/A		1		0	N/A	1	N/A	0	0	1		N/A		N/A	N/A	1	N/A	0	0	0		1		N/A	N/A	N/A	N/A	0	0	0		1		1	N/A	N/A
AG	1	Macro	Enamel hypoplastic defect - type -linear	SMB 66B	30	30 to 40	< 23.5	F	labial/buccal	whole skull	N/A	0	N/A		0		0	N/A	0	N/A	2	0	0		N/A		N/A	N/A	0	N/A	0	0	0		0		N/A	N/A	N/A	N/A	0	0	0		0		0	N/A	N/A
AG	1	Macro	Enamel hypoplastic defect - type -linear	SMB 66B	30	30 to 40	< 23.5	F	lingual	whole skull	N/A	0	N/A		2		0	N/A	2	N/A	0	0	2		N/A		N/A	N/A	2	N/A	0	0	0		2		N/A	N/A	N/A	N/A	0	0	0		2		2	N/A	N/A
AG	1	Macro	Enamel hypoplastic defects-number of lines	SMB 66B	30	30 to 40	< 23.5	F	labial/buccal	whole skull	N/A	0	N/A		0		0	N/A	0	N/A	0	0	0		N/A		N/A	N/A	0	N/A	0	0	0		0		N/A	N/A	N/A	N/A	0	0	0		0		0	N/A	N/A
AG	1	Macro	Enamel hypoplastic defects-number of lines	SMB 66B	30	30 to 40	< 23.5	F	lingual	whole skull	N/A	0	N/A		0		0	N/A	0	N/A	0	0	0		N/A		N/A	N/A	0	N/A	0	0	0		0		N/A	N/A	N/A	N/A	0	0	0		0		0	N/A	N/A
AG	1	Macro	Enamel hypoplastic defect - type - pits	SMB 66B	30	30 to 40	< 23.5	F	labial/buccal	whole skull	N/A	0	N/A		0		0	N/A	0	N/A	1	0	0		N/A		N/A	N/A	0	N/A	0	0	0		0		N/A	N/A	N/A	N/A	0	0	0		0		0	N/A	N/A
AG	1	Macro	Enamel hypoplastic defect - type - pits	SMB 66B	30	30 to 40	< 23.5	F	lingual	whole skull	N/A	0	N/A		0		1	N/A	1	N/A	0	0	1		N/A		N/A	N/A	1	N/A	0	0	0		1		N/A	N/A	N/A	N/A	0	0	0		1		1	N/A	N/A
AG	1	Macro	Enamel hypoplastic defects-number of pits	SMB 66B	30	30 to 40	< 23.5	F	labial/buccal	whole skull	N/A	0	N/A		0		0	N/A	0	N/A	2	0	0		N/A		N/A	N/A	0	N/A	0	0	0		0		N/A	N/A	N/A	N/A	0	0	0		0		0	N/A	N/A
AG	1	Macro	Enamel hypoplastic defects-number of pits	SMB 66B	30	30 to 40	< 23.5	F	lingual	whole skull	N/A	0	N/A		2		0	N/A	2	N/A	0	0	2		N/A		N/A	N/A	2	N/A	0	0	0		1		N/A	N/A	N/A	N/A	0	0	0		2		2	N/A	N/A
AG	1	Macro	Enamel hypoplastic defect - measurement 1 (mm)	SMB 66B	30	30 to 40	< 23.5	F	labial/buccal	whole skull	N/A	0	N/A		3		0	N/A	0	N/A	5	0	0		N/A		N/A	N/A	0	N/A	0	0	0		0		N/A	N/A	N/A	N/A	0	0	0		0		0	N/A	N/A
AG	1	Macro	Enamel hypoplastic defect - measurement 1 (mm)	SMB 66B	30	30 to 40	< 23.5	F	lingual	whole skull	N/A	0	N/A		0		0	N/A	2	N/A	0	0	2		N/A		N/A	N/A	2	N/A	0	0	0		4.5		N/A	N/A	N/A	N/A	0	0	0		3		3	N/A	N/A
AG	1	Macro	Enamel hypoplastic defect - measurement 2 (mm)	SMB 66B	30	30 to 40	< 23.5	F	labial/buccal	whole skull	N/A	0	N/A		0		0	N/A	0	N/A	0	0	0		N/A		N/A	N/A	0	N/A	0	0	0		0		N/A	N/A	N/A	N/A	0	0	0		0		0	N/A	N/A
AG	1	Macro	Enamel hypoplastic defect - measurement 2 (mm)	SMB 66B	30	30 to 40	< 23.5	F	lingual	whole skull	N/A	0	N/A		0		0	N/A	0	N/A	0	0	0		N/A		N/A	N/A	0	N/A	0	0	0		0		N/A	N/A	N/A	N/A	0	0	0		0		0	N/A	N/A
AG	1	Macro	Enamel hypoplastic defect - measurement 3 (mm)	SMB 66B	30	30 to 40	< 23.5	F	labial/buccal	whole skull	N/A	0	N/A		0		0	N/A	0	N/A	0	0	0		N/A		N/A	N/A	0	N/A	0	0	0		0		N/A	N/A	N/A	N/A	0	0	0		0		0	N/A	N/A
AG	1	Macro	Enamel hypoplastic defect - measurement 3 (mm)	SMB 66B	30	30 to 40	< 23.5	F	lingual	whole skull	N/A	0	N/A		0		0	N/A	0	N/A	0	0	0		N/A		N/A	N/A	0	N/A	0	0	0		0		N/A	N/A	N/A	N/A	0	0	0		0		0	N/A	N/A
AG	1	Macro	Enamel hypoplastic defect - measurement 4 (mm)	SMB 66B	30	30 to 40	< 23.5	F	labial/buccal	whole skull	N/A	0	N/A		0		0	N/A	0	N/A	0	0	0		N/A		N/A	N/A	0	N/A	0	0	0		0		N/A	N/A	N/A	N/A	0	0	0		0		0	N/A	N/A
AG	1	Macro	Enamel hypoplastic defect - measurement 4 (mm)	SMB 66B	30	30 to 40	< 23.5	F	lingual	whole skull	N/A	0	N/A		0		0	N/A	0	N/A	0	0	0		N/A		N/A	N/A	0	N/A	0	0	0		0		N/A	N/A	N/A	N/A	0	0	0		0		0	N/A	N/A
AG	1	Macro	IGD - present	SMB 66B	30	30 to 40	< 23.5	F	internal	whole skull
AG	1	Radiographic	Inventory	SMB 66B	30	30 to 40	< 23.5	F	labial/buccal	whole skull	4	2	4		2		2	3	2	4	2	2	2		3		4	3	2	3	2	2	2		2		4	3	3	3	2	2	2		2		3	3	3
AG	1	Radiographic	Tooth Wear	SMB 66B	30	30 to 40	< 23.5	F	occlusal	whole skull	0	3	0		2		2	0	3	0	3	3	3		0		0	0	3	0	5	5	5		4		0	0	0	0	5	5	5		4		4	0	0
AG	1	Radiographic	Dental Trauma	SMB 66B	30	30 to 40	< 23.5	F	labial/buccal	whole skull	N/A	0	N/A		0		0	N/A	3*	N/A	0	0	0		N/A		N/A	N/A	0	N/A	0	0	0		0		N/A	N/A	N/A	N/A	2	0	0		0		0	N/A	N/A
AG	1	Radiographic	Dental Trauma	SMB 66B	30	30 to 40	< 23.5	F	lingual	whole skull
AG	1	Radiographic	Occlusion	SMB 66B	30	30 to 40	< 23.5	F	Occlusal	whole skull
AG	1	Radiographic	Overbite	SMB 66B	30	30 to 40	< 23.5	F	occlusal	whole skull
AG	1	Radiographic	Overjet	SMB 66B	30	30 to 40	< 23.5	F	occlusal	whole skull
AG	1	Radiographic	Caries - present on tooth	SMB 66B	30	30 to 40	< 23.5	F	All	whole skull	N/A	1	N/A		1		0	N/A	1	N/A	1	0	1		N/A		N/A	N/A	1	N/A	1	0	1		0		0	N/A	N/A	N/A	0	0	0		0		0	N/A	N/A
AG	1	Radiographic	Caries- location 1	SMB 66B	30	30 to 40	< 23.5	F	mesial	whole skull	N/A	1	N/A		1		0	N/A	2	N/A	1	0	1		N/A		N/A	N/A	1	N/A	2	0	1		0		N/A	N/A	N/A	N/A	0	0	0		0		N/A	N/A	N/A
AG	1	Radiographic	Caries- location 2	SMB 66B	30	30 to 40	< 23.5	F	distal	whole skull	N/A	2	N/A		2		0	N/A	2	N/A	2	0	2		N/A		N/A	N/A	1	N/A	1	0	2		0		N/A	N/A	N/A	N/A	2	1	2		1		N/A	N/A	N/A
AG	1	Radiographic	Caries- location 3	SMB 66B	30	30 to 40	< 23.5	F	occlusal	whole skull
AG	1	Radiographic	Caries- location 4	SMB 66B	30	30 to 40	< 23.5	F	labial/buccal	whole skull
AG	1	Radiographic	Caries- location 5	SMB 66B	30	30 to 40	< 23.5	F	lingual	whole skull
AG	1	Radiographic	Caries _ CEJ 1	SMB 66B	30	30 to 40	< 23.5	F	labial/buccal	whole skull	N/A	1	N/A		1		0	N/A	1	N/A	1	0	1		N/A		N/A	N/A	1	N/A	1	0	1		0		N/A	N/A	N/A	N/A	0	0	0		0		0	N/A	N/A
AG	1	Radiographic	Caries _ CEJ 2	SMB 66B	30	30 to 40	< 23.5	F	labial/buccal	whole skull	N/A	2	N/A		2		0	N/A	2	N/A	2	0	2		N/A		N/A	N/A	1	N/A	2	0	2		0		N/A	N/A	N/A	N/A	0	0	0		0		0	N/A	N/A
AG	1	Radiographic	Caries _ CEJ 3	SMB 66B	30	30 to 40	< 23.5	F	labial/buccal	whole skull	N/A	2	N/A		2		0	N/A	2	N/A	2	0	2		N/A		N/A	N/A	1	N/A	2	0	2		0		N/A	N/A	N/A	N/A	0	0	0		0		0	N/A	N/A
AG	1	Radiographic	Caries - Radiolucency	SMB 66B	30	30 to 40	< 23.5	F	labial/buccal	whole skull	N/A	1	N/A		1		0	N/A	1	N/A	2	0	3		N/A		N/A	N/A	2	N/A	3	0	4		0		0	N/A	N/A	N/A	0	0	0		0		0	N/A	N/A
AG	1	Radiographic	Alveolar status	SMB 66B	30	30 to 40	< 23.5	F	labial/buccal	whole skull
AG	1	Radiographic	Periodontal disease	SMB 66B	30	30 to 40	< 23.5	F	labial/buccal	whole skull
AG	1	Radiographic	Periodontal disease	SMB 66B	30	30 to 40	< 23.5	F	lingual	whole skull
AG	1	Radiographic	Enamel hypoplastic defect - present	SMB 66B	30	30 to 40	< 23.5	F	labial/buccal	whole skull
AG	1	Radiographic	Enamel hypoplastic defect - present	SMB 66B	30	30 to 40	< 23.5	F	lingual	whole skull
AG	1	Radiographic	Enamel hypoplastic defect - type -linear	SMB 66B	30	30 to 40	< 23.5	F	labial/buccal	whole skull
AG	1	Radiographic	Enamel hypoplastic defect - type -linear	SMB 66B	30	30 to 40	< 23.5	F	lingual	whole skull
AG	1	Radiographic	Enamel hypoplastic defects-number of lines	SMB 66B	30	30 to 40	< 23.5	F	labial/buccal	whole skull
AG	1	Radiographic	Enamel hypoplastic defects-number of lines	SMB 66B	30	30 to 40	< 23.5	F	lingual	whole skull
AG	1	Radiographic	Enamel hypoplastic defect - type - pits	SMB 66B	30	30 to 40	< 23.5	F	labial/buccal	whole skull
AG	1	Radiographic	Enamel hypoplastic defect - type - pits	SMB 66B	30	30 to 40	< 23.5	F	lingual	whole skull
AG	1	Radiographic	Enamel hypoplastic defects-number of pits	SMB 66B	30	30 to 40	< 23.5	F	labial/buccal	whole skull
AG	1	Radiographic	Enamel hypoplastic defects-number of pits	SMB 66B	30	30 to 40	< 23.5	F	lingual	whole skull
AG	1	Radiographic	Enamel hypoplastic defect - measurement 1 (mm)	SMB 66B	30	30 to 40	< 23.5	F	labial/buccal	whole skull
AG	1	Radiographic	Enamel hypoplastic defect - measurement 1 (mm)	SMB 66B	30	30 to 40	< 23.5	F	lingual	whole skull
AG	1	Radiographic	Enamel hypoplastic defect - measurement 2 (mm)	SMB 66B	30	30 to 40	< 23.5	F	labial/buccal	whole skull
AG	1	Radiographic	Enamel hypoplastic defect - measurement 2 (mm)	SMB 66B	30	30 to 40	< 23.5	F	lingual	whole skull
AG	1	Radiographic	Enamel hypoplastic defect - measurement 3 (mm)	SMB 66B	30	30 to 40	< 23.5	F	labial/buccal	whole skull
AG	1	Radiographic	Enamel hypoplastic defect - measurement 3 (mm)	SMB 66B	30	30 to 40	< 23.5	F	lingual	whole skull
AG	1	Radiographic	Enamel hypoplastic defect - measurement 4 (mm)	SMB 66B	30	30 to 40	< 23.5	F	labial/buccal	whole skull
AG	1	Radiographic	Enamel hypoplastic defect - measurement 4 (mm)	SMB 66B	30	30 to 40	< 23.5	F	lingual	whole skull
AG	1	Radiographic	IGD - present	SMB 66B	30	30 to 40	< 23.5	F	internal	whole skull
AG	1	L.v micro-CT	Inventory	SMB 66B	30	30 to 40	< 23.5	F	labial/buccal	whole skull	1	2	3		2		2	3	2	3	2	2	2		4		4	3	2	3	2	2	2		2		4	3	3	3	2	2	2		2		2	3	3
AG	1	L.v micro-CT	Tooth Wear	SMB 66B	30	30 to 40	< 23.5	F	occlusal	whole skull	0	3	0		4		3	0	2	0	4	3	3		0		0	0	3	0	5	5	5		4		3	0	0	0	5	5	5		2		3	0	0
AG	1	L.v micro-CT	Dental Trauma	SMB 66B	30	30 to 40	< 23.5	F	labial/buccal	whole skull	N/A	0	N/A		0		0	N/A	3	N/A	0	0	1		N/A		N/A	N/A	0	N/A	0	1	1		0		N/A	N/A	N/A	N/A	0	0	1		1		0	N/A	N/A
AG	1	L.v micro-CT	Dental Trauma	SMB 66B	30	30 to 40	< 23.5	F	lingual	whole skull	N/A	0	N/A		0		0	N/A	0	N/A	0	0	0		N/A		N/A	N/A	0	N/A	0	1	0		0		N/A	N/A	N/A	N/A	0	1	1		0		0	N/A	N/A
AG	1	L.v micro-CT	Occlusion	SMB 66B	30	30 to 40	< 23.5	F	occlusal	whole skull
AG	1	L.v micro-CT	Overbite	SMB 66B	30	30 to 40	< 23.5	F	occlusal	whole skull
AG	1	L.v micro-CT	Overjet	SMB 66B	30	30 to 40	< 23.5	F	occlusal	whole skull
AG	1	L.v micro-CT	Caries - present on tooth	SMB 66B	30	30 to 40	< 23.5	F	All	whole skull	N/A	0	N/A		1		0	N/A	N/A	N/A	1	1	1		N/A		N/A	N/A	0	N/A	0	1	0		1		N/A	N/A	N/A	N/A	1	0	1		1		0	N/A	N/A
AG	1	L.v micro-CT	Caries- location 1	SMB 66B	30	30 to 40	< 23.5	F	mesial	whole skull	N/A	0	N/A		1		0	N/A	N/A	N/A	1	2	2		N/A		N/A	N/A	0	N/A	0	1	0		2		2	N/A	N/A	N/A	1	0	2		1		0	N/A	N/A
AG	1	L.v micro-CT	Caries- location 2	SMB 66B	30	30 to 40	< 23.5	F	distal	whole skull	N/A	0	N/A		2		0	N/A	N/A	N/A	2	1	1		N/A		N/A	N/A	0	N/A	0	1	0		2		N/A	N/A	N/A	N/A	2	0	1		2		0	N/A	N/A
AG	1	L.v micro-CT	Caries- location 3	SMB 66B	30	30 to 40	< 23.5	F	occlusal	whole skull	N/A	0	N/A		2		0	N/A	N/A	N/A	2	2	2		N/A		N/A	N/A	0	N/A	0	2	0		2		N/A	N/A	N/A	N/A	2	0	2		2		0	N/A	N/A
AG	1	L.v micro-CT	Caries- location 4	SMB 66B	30	30 to 40	< 23.5	F	labial/buccal	whole skull	N/A	0	N/A		2		0	N/A	N/A	N/A	2	0	2		N/A		N/A	N/A	0	N/A	0	2	0		1		N/A	N/A	N/A	N/A	2	0	2		2		0	N/A	N/A
AG	1	L.v micro-CT	Caries- location 5	SMB 66B	30	30 to 40	< 23.5	F	lingual	whole skull	N/A	0	N/A		2		0	N/A	N/A	N/A	2	2	2		N/A		N/A	N/A	0	N/A	0	2	0		2		N/A	N/A	N/A	N/A	2	0	2		2		0	N/A	N/A
AG	1	L.v micro-CT	Caries _ CEJ 1	SMB 66B	30	30 to 40	< 23.5	F	labial/buccal	whole skull	N/A	0	N/A		1		0	N/A	N/A	N/A	1	2	1		N/A		N/A	N/A	0	N/A	0	2	0		2		N/A	N/A	N/A	N/A	0	0	2		2		0	N/A	N/A
AG	1	L.v micro-CT	Caries _ CEJ 2	SMB 66B	30	30 to 40	< 23.5	F	labial/buccal	whole skull	N/A	2	N/A		2		0	N/A	N/A	N/A	2	1	2		N/A		N/A	N/A	0	N/A	0	1	0		1		N/A	N/A	N/A	N/A	0	0	1		2		0	N/A	N/A
AG	1	L.v micro-CT	Caries _ CEJ 3	SMB 66B	30	30 to 40	< 23.5	F	labial/buccal	whole skull	N/A	0	N/A		2		0	N/A	N/A	N/A	2	2	2		N/A		N/A	N/A	0	N/A	0	2	0		2		N/A	N/A	N/A	N/A	0	0	2		1		0	N/A	N/A
AG	1	L.v micro-CT	Caries - Radiolucency	SMB 66B	30	30 to 40	< 23.5	F	labial/buccal	whole skull	N/A	0	N/A		1		0	N/A	N/A	N/A	1	2	3		N/A		N/A	N/A	0	N/A	0	2	0		2		N/A	N/A	N/A	N/A	2	0	1		1		0	N/A	N/A
AG	1	L.v micro-CT	Alveolar status	SMB 66B	30	30 to 40	< 23.5	F	labial/buccal	whole skull					3		4	0	0	0					0		0	0	3	0					4		4	0	0	0					4		0	0	0
AG	1	L.v micro-CT	Periodontal disease	SMB 66B	30	30 to 40	< 23.5	F	labial/buccal	whole skull	N/A	2.8	N/A		5.23		3.82	N/A	5.64	N/A	3.67	4.1	3.23		N/A		N/A	N/A	4.48	N/A	3.88	3.83	6.46		5.12		N/A	N/A	N/A	N/A	3.97	5.06	6.49		5.75		5.2	N/A	N/A
AG	1	L.v micro-CT	Periodontal disease	SMB 66B	30	30 to 40	< 23.5	F	lingual	whole skull	N/A	2.97	N/A		3.5		4.77	N/A	5.99	N/A	2.6	2.19	2.53		N/A		N/A	N/A	3.8	N/A	5.04	4.1	3.64		4.21		N/A	N/A	N/A	N/A	4.94	4.84	4.64		3.82		3.55	N/A	N/A
AG	1	L.v micro-CT	Enamel hypoplastic defect - present	SMB 66B	30	30 to 40	< 23.5	F	labial/buccal	whole skull	N/A	0	N/A		0		0	N/A	N/A	N/A	1	1	1		N/A		N/A	N/A	0	N/A	1	1	1		1		N/A	N/A	N/A	N/A	0	0	0		1		0	N/A	N/A
AG	1	L.v micro-CT	Enamel hypoplastic defect - present	SMB 66B	30	30 to 40	< 23.5	F	lingual	whole skull	N/A	1	N/A		0		0	N/A	1	N/A	0	0	1		N/A		N/A	N/A	0	N/A	1	1	1		1		N/A	N/A	N/A	N/A	0	1	1		0		0	N/A	N/A
AG	1	L.v micro-CT	Enamel hypoplastic defect - type -linear	SMB 66B	30	30 to 40	< 23.5	F	labial/buccal	whole skull	N/A	0	N/A		0		0	N/A	N/A	N/A	2	2	2		N/A		N/A	N/A	0	N/A	1	1	2		2		N/A	N/A	N/A	N/A	0	0	0		2		0	N/A	N/A
AG	1	L.v micro-CT	Enamel hypoplastic defect - type -linear	SMB 66B	30	30 to 40	< 23.5	F	lingual	whole skull	N/A	2	N/A		0		0	N/A	2	N/A	0	0	2		N/A		N/A	N/A	0	N/A	2	2	2		2		N/A	N/A	N/A	N/A	0	2	2		2		0	N/A	N/A
AG	1	L.v micro-CT	Enamel hypoplastic defects-number of lines	SMB 66B	30	30 to 40	< 23.5	F	labial/buccal	whole skull	N/A	0	N/A		0		0	N/A	N/A	N/A	0	0	0		N/A		N/A	N/A	0	N/A	2	2	0		0		N/A	N/A	N/A	N/A	0	0	0		0		0	N/A	N/A
AG	1	L.v micro-CT	Enamel hypoplastic defects-number of lines	SMB 66B	30	30 to 40	< 23.5	F	lingual	whole skull	N/A	0	N/A		0		0	N/A	0	N/A	0	0	0		N/A		N/A	N/A	0	N/A	0	0	0		0		N/A	N/A	N/A	N/A	0	0	0		0		0	N/A	N/A
AG	1	L.v micro-CT	Enamel hypoplastic defect - type - pits	SMB 66B	30	30 to 40	< 23.5	F	labial/buccal	whole skull	N/A	0	N/A		0		0	N/A	N/A	N/A	1	1	1		N/A		N/A	N/A	0	N/A	2	2	1		1		N/A	N/A	N/A	N/A	0	0	0		1		0	N/A	N/A
AG	1	L.v micro-CT	Enamel hypoplastic defect - type - pits	SMB 66B	30	30 to 40	< 23.5	F	lingual	whole skull	N/A	1	N/A		0		0	N/A	1	N/A	0	0	1		N/A		N/A	N/A	0	N/A	1	1	1		1		N/A	N/A	N/A	N/A	0	1	1		1		0	N/A	N/A
AG	1	L.v micro-CT	Enamel hypoplastic defects-number of pits	SMB 66B	30	30 to 40	< 23.5	F	labial/buccal	whole skull	N/A	0	N/A		0		0	N/A	N/A	N/A	1	1	2		N/A		N/A	N/A	0	N/A	0	0	2		2		N/A	N/A	N/A	N/A	0	0	0		2		0	N/A	N/A
AG	1	L.v micro-CT	Enamel hypoplastic defects-number of pits	SMB 66B	30	30 to 40	< 23.5	F	lingual	whole skull	N/A	1	N/A		0		0	N/A	2	N/A	0	0	1		N/A		N/A	N/A	0	N/A	2	2	2		1		N/A	N/A	N/A	N/A	0	2	2		1		0	N/A	N/A
AG	1	L.v micro-CT	Enamel hypoplastic defect - measurement 1 (mm)	SMB 66B	30	30 to 40	< 23.5	F	labial/buccal	whole skull	N/A	0	N/A		0		0	N/A	N/A	N/A	7.62	5.86	1.3		N/A		N/A	N/A	0	N/A	2.21	2.62	1.44		2.09		N/A	N/A	N/A	N/A	0	0	1.74		1.99		0	N/A	N/A
AG	1	L.v micro-CT	Enamel hypoplastic defect - measurement 1 (mm)	SMB 66B	30	30 to 40	< 23.5	F	lingual	whole skull	N/A	2.53	N/A		0		0	N/A	0.63	N/A	0	0	2.89		N/A		N/A	N/A	0	N/A	1.83	1.97	4.27		3.89		N/A	N/A	N/A	N/A	0	4.95	2.69		3.41		0	N/A	N/A
AG	1	L.v micro-CT	Enamel hypoplastic defect - measurement 2 (mm)	SMB 66B	30	30 to 40	< 23.5	F	labial/buccal	whole skull	N/A	0	N/A		0		0	N/A	0	N/A	0	0	0		N/A		N/A	N/A	0	N/A	3.91	3.89	0		0		N/A	N/A	N/A	N/A	0	0	0		0		0	N/A	N/A
AG	1	L.v micro-CT	Enamel hypoplastic defect - measurement 2 (mm)	SMB 66B	30	30 to 40	< 23.5	F	lingual	whole skull	N/A	0	N/A		0		0	N/A	0	N/A	0	0	0		N/A		N/A	N/A	0	N/A	4.22	3.55	5.52		0		N/A	N/A	N/A	N/A	0	6.17	4.17		0		0	N/A	N/A
AG	1	L.v micro-CT	Enamel hypoplastic defect - measurement 3 (mm)	SMB 66B	30	30 to 40	< 23.5	F	labial/buccal	whole skull	N/A	0	N/A		0		0	N/A	0	N/A	0	0	0		N/A		N/A	N/A	0	N/A	0	0	0		0		N/A	N/A	N/A	N/A	0	0	0		0		0	N/A	N/A
AG	1	L.v micro-CT	Enamel hypoplastic defect - measurement 3 (mm)	SMB 66B	30	30 to 40	< 23.5	F	lingual	whole skull	N/A	0	N/A		0		0	N/A	0	N/A	0	0	0		N/A		N/A	N/A	0	N/A	5.44	5.86	0		0		N/A	N/A	N/A	N/A	0	0	6.9		0		0	N/A	N/A
AG	1	L.v micro-CT	Enamel hypoplastic defect - measurement 4 (mm)	SMB 66B	30	30 to 40	< 23.5	F	labial/buccal	whole skull	N/A	0	N/A		0		0	N/A	0	N/A	0	0	0		N/A		N/A	N/A	0	N/A	0	0	0		0		N/A	N/A	N/A	N/A	0	0	0		0		0	N/A	N/A
AG	1	L.v micro-CT	Enamel hypoplastic defect - measurement 4 (mm)	SMB 66B	30	30 to 40	< 23.5	F	lingual	whole skull	N/A	0	N/A		0		0	N/A	0	N/A	0	0	0		N/A		N/A	N/A	0	N/A	0	0	0		0		N/A	N/A	N/A	N/A	0	0	0		0		0	N/A	N/A
AG	1	L.v micro-CT	IGD - present	SMB 66B	30	30 to 40	< 23.5	F	internal	whole skull	N/A	0	N/A		0		0	N/A	0	N/A	0	0	0		N/A		N/A	N/A	0	N/A	0	0	0		0		N/A	N/A	N/A	N/A	0	0	0		0		0	N/A	N/A
AG	1	S.v micro-CT	Inventory	SMB 66B	30	30 to 40		F	labial/buccal	Individual tooth samples
AG	1	S.v micro-CT	Tooth Wear	SMB 66B	30	30 to 40		F	occlusal	Individual tooth samples		3			3		2		2				3
AG	1	S.v micro-CT	Dental Trauma	SMB 66B	30	30 to 40		F	labial/buccal	Individual tooth samples		1			3		0		3				1
AG	1	S.v micro-CT	Dental Trauma	SMB 66B	30	30 to 40		F	lingual	Individual tooth samples		2			2		0		0				0
AG	1	S.v micro-CT	Occlusion	SMB 66B	30	30 to 40		F	occlusal	Individual tooth samples
AG	1	S.v micro-CT	Overbite	SMB 66B	30	30 to 40		F	occlusal	Individual tooth samples
AG	1	S.v micro-CT	Overjet	SMB 66B	30	30 to 40		F	occlusal	Individual tooth samples
AG	1	S.v micro-CT	Caries - present on tooth	SMB 66B	30	30 to 40		F	All	Individual tooth samples		1			1		0		0				2
AG	1	S.v micro-CT	Caries- location 1	SMB 66B	30	30 to 40		F	mesial	Individual tooth samples		1			1		0		0				2
AG	1	S.v micro-CT	Caries- location 2	SMB 66B	30	30 to 40		F	distal	Individual tooth samples		2			2		0		0				1
AG	1	S.v micro-CT	Caries- location 3	SMB 66B	30	30 to 40		F	occlusal	Individual tooth samples		2			2		0		0				2
AG	1	S.v micro-CT	Caries- location 4	SMB 66B	30	30 to 40		F	labial/buccal	Individual tooth samples		2			2		0		0				2
AG	1	S.v micro-CT	Caries- location 5	SMB 66B	30	30 to 40		F	lingual	Individual tooth samples		2			2		0		0				2
AG	1	S.v micro-CT	Caries _ CEJ 1	SMB 66B	30	30 to 40		F	labial/buccal	Individual tooth samples		1			1		0		0				2
AG	1	S.v micro-CT	Caries _ CEJ 2	SMB 66B	30	30 to 40		F	labial/buccal	Individual tooth samples		2			2		0		0				1
AG	1	S.v micro-CT	Caries _ CEJ 3	SMB 66B	30	30 to 40		F	labial/buccal	Individual tooth samples		2			2		0		0				2
AG	1	S.v micro-CT	Caries - Radiolucency	SMB 66B	30	30 to 40		F	labial/buccal	Individual tooth samples		3			1		0		0				1
AG	1	S.v micro-CT	Alveolar status	SMB 66B	30	30 to 40		F	labial/buccal	Individual tooth samples
AG	1	S.v micro-CT	Periodontal disease	SMB 66B	30	30 to 40		F	labial/buccal	Individual tooth samples
AG	1	S.v micro-CT	Periodontal disease	SMB 66B	30	30 to 40		F	labial/buccal	Individual tooth samples
AG	1	S.v micro-CT	Enamel hypoplastic defect - present	SMB 66B	30	30 to 40		F	labial/buccal	Individual tooth samples		0			1		1		N/A				1
AG	1	S.v micro-CT	Enamel hypoplastic defect - present	SMB 66B	30	30 to 40		F	lingual	Individual tooth samples		1			0		0		1				1
AG	1	S.v micro-CT	Enamel hypoplastic defect - type -linear	SMB 66B	30	30 to 40		F	labial/buccal	Individual tooth samples		0			2		2		N/A				2
AG	1	S.v micro-CT	Enamel hypoplastic defect - type -linear	SMB 66B	30	30 to 40		F	lingual	Individual tooth samples		2			0		0		2				2
AG	1	S.v micro-CT	Enamel hypoplastic defects-number of lines	SMB 66B	30	30 to 40		F	labial/buccal	Individual tooth samples		0			0		0		N/A				0
AG	1	S.v micro-CT	Enamel hypoplastic defects-number of lines	SMB 66B	30	30 to 40		F	lingual	Individual tooth samples		0			0		0		0				0
AG	1	S.v micro-CT	Enamel hypoplastic defect - type - pits	SMB 66B	30	30 to 40		F	labial/buccal	Individual tooth samples		0			1		1		N/A				1
AG	1	S.v micro-CT	Enamel hypoplastic defect - type - pits	SMB 66B	30	30 to 40		F	lingual	Individual tooth samples		1			0		0		1				1
AG	1	S.v micro-CT	Enamel hypoplastic defects-number of pits	SMB 66B	30	30 to 40		F	labial/buccal	Individual tooth samples		0			1		2		N/A				2
AG	1	S.v micro-CT	Enamel hypoplastic defects-number of pits	SMB 66B	30	30 to 40		F	lingual	Individual tooth samples		1			0		0		2				2
AG	1	S.v micro-CT	Enamel hypoplastic defect - measurement 1 (mm)	SMB 66B	30	30 to 40		F	labial/buccal	Individual tooth samples		0			2.87		1.68		N/A				2.25
AG	1	S.v micro-CT	Enamel hypoplastic defect - measurement 1 (mm)	SMB 66B	30	30 to 40		F	lingual	Individual tooth samples		3.08			0		0		2.3				3.18
AG	1	S.v micro-CT	Enamel hypoplastic defect - measurement 2 (mm)	SMB 66B	30	30 to 40		F	labial/buccal	Individual tooth samples		0			0		5.02		N/A				0
AG	1	S.v micro-CT	Enamel hypoplastic defect - measurement 2 (mm)	SMB 66B	30	30 to 40		F	lingual	Individual tooth samples		0			0		0		3.83				0
AG	1	S.v micro-CT	Enamel hypoplastic defect - measurement 3 (mm)	SMB 66B	30	30 to 40		F	labial/buccal	Individual tooth samples		0			0		5.37		N/A				0
AG	1	S.v micro-CT	Enamel hypoplastic defect - measurement 3 (mm)	SMB 66B	30	30 to 40		F	lingual	Individual tooth samples		0			0		0		0				0
AG	1	S.v micro-CT	Enamel hypoplastic defect - measurement 4 (mm)	SMB 66B	30	30 to 40		F	labial/buccal	Individual tooth samples		0			0		0		N/A				0
AG	1	S.v micro-CT	Enamel hypoplastic defect - measurement 4 (mm)	SMB 66B	30	30 to 40		F	lingual	Individual tooth samples		0			0		0		0				0
AG	1	S.v micro-CT	IGD - present	SMB 66B	30	30 to 40		F	internal	Individual tooth samples		0			0		0		0				0
AG	2	Macro	Inventory	SMB 66B	30	30 to 40	< 23.5	F	labial/buccal	whole skull	4	2	3		2		2	4	2	4	2	2	2		4		4	3	2	4	2	2	2		2		4	3	3	3	2	2	2		2		2	3	3
AG	2	Macro	Tooth Wear	SMB 66B	30	30 to 40	< 23.5	F	occlusal	whole skull	N/A	3	N/A		3		2	N/A	2	N/A	5	3	3		N/A		N/A	N/A	3	N/A	4	4	4		3		N/A	N/A	N/A	N/A	4	4	4		3		3	N/A	N/A
AG	2	Macro	Dental Trauma	SMB 66B	30	30 to 40	< 23.5	F	labial/buccal	whole skull	N/A	1	N/A		0		0	N/A	3	N/A	1	1	1		N/A		N/A	N/A	0	N/A	1	1	1		1		N/A	N/A	N/A	N/A	0	0	1		1		0	N/A	N/A
AG	2	Macro	Dental Trauma	SMB 66B	30	30 to 40	< 23.5	F	lingual	whole skull	N/A	0	N/A		0		0	N/A	0	N/A	0	0	0		N/A		N/A	N/A	0	N/A	0	0	1		0		N/A	N/A	N/A	N/A	0	0	0		0		0	N/A	N/A
AG	2	Macro	Occlusion	SMB 66B	30	30 to 40	< 23.5	F	occlusal	whole skull
AG	2	Macro	Overbite	SMB 66B	30	30 to 40	< 23.5	F	labial/buccal	whole skull	N/A	2	N/A								1	2	1
AG	2	Macro	Overjet	SMB 66B	30	30 to 40	< 23.5	F	labial/buccal	whole skull	N/A	2	N/A								2	3	1
AG	2	Macro	Caries - present on tooth	SMB 66B	30	30 to 40	< 23.5	F	All	whole skull	N/A	1	N/A		1		0	N/A	1	N/A	1	1	1		N/A		N/A	N/A	1	N/A	1	0	1		1		N/A	N/A	N/A	N/A	0	1	0		0		0	N/A	N/A
AG	2	Macro	Caries- location 1	SMB 66B	30	30 to 40	< 23.5	F	mesial	whole skull	N/A	1	N/A		1		0	N/A	1	N/A	1	2	1		N/A		N/A	N/A	2	N/A	2	0	1		2		N/A	N/A	N/A	N/A	0	2	0		0		0	N/A	N/A
AG	2	Macro	Caries- location 2	SMB 66B	30	30 to 40	< 23.5	F	distal	whole skull	N/A	2	N/A		2		0	N/A	2	N/A	1	1	2		N/A		N/A	N/A	2	N/A	1	0	2		2		N/A	N/A	N/A	N/A	0	1	0		0		0	N/A	N/A
AG	2	Macro	Caries- location 3	SMB 66B	30	30 to 40	< 23.5	F	occlusal	whole skull	N/A	2	N/A		2		0	N/A	1	N/A	2	0	2		N/A		N/A	N/A	1	N/A	2	2	2		2		N/A	N/A	N/A	N/A	2	2	2		2		0	N/A	N/A
AG	2	Macro	Caries- location 4	SMB 66B	30	30 to 40	< 23.5	F	labial/buccal	whole skull	N/A	2	N/A		2		0	N/A	2	N/A	2	0	2		N/A		N/A	N/A	2	N/A	2	1	2		2		N/A	N/A	N/A	N/A	1	2	1		2		0	N/A	N/A
AG	2	Macro	Caries- location 5	SMB 66B	30	30 to 40	< 23.5	F	lingual	whole skull	N/A	1	N/A		2		0	N/A	2	N/A	2	0	2		N/A		N/A	N/A	2	N/A	2	2	2		2		N/A	N/A	N/A	N/A	2	2	2		2		0	N/A	N/A
AG	2	Macro	Caries _ CEJ 1	SMB 66B	30	30 to 40	< 23.5	F	labial/buccal	whole skull	N/A	1	N/A		1		0	N/A	1	N/A	1	2	1		N/A		N/A	N/A	1	N/A	2	0	2		2		N/A	N/A	N/A	N/A	0	2	0		0		0	N/A	N/A
AG	2	Macro	Caries _ CEJ 2	SMB 66B	30	30 to 40	< 23.5	F	labial/buccal	whole skull	N/A	2	N/A		2		0	N/A	2	N/A	2	1	2		N/A		N/A	N/A	2	N/A	1	1	1		1		N/A	N/A	N/A	N/A	0	1	0		0		0	N/A	N/A
AG	2	Macro	Caries _ CEJ 3	SMB 66B	30	30 to 40	< 23.5	F	labial/buccal	whole skull	N/A	2	N/A		2		1	N/A	2	N/A	2	2	2		N/A		N/A	N/A	2	N/A	2	0	2		2		N/A	N/A	N/A	N/A	0	2	0		0		0	N/A	N/A
AG	2	Macro	Caries - Radiolucency	SMB 66B	30	30 to 40	< 23.5	F	labial/buccal	whole skull
AG	2	Macro	Alveolar status	SMB 66B	30	30 to 40	< 23.5	F	labial/buccal	whole skull	3	3	0		0		0	2	2	2	0	0	3		0		0	0	0	4	2	0	0		0		0	0	0	0					4		4	2	0
AG	2	Macro	Periodontal disease	SMB 66B	30	30 to 40	< 23.5	F	labial/buccal	whole skull	N/A	3	N/A		5		4	N/A	N/A	N/A	2	2	4		N/A		N/A	N/A	3	N/A	4	4	5		4		N/A	N/A	N/A	N/A	3	4	5		3		3	N/A	N/A
AG	2	Macro	Periodontal disease	SMB 66B	30	30 to 40	< 23.5	F	lingual	whole skull	N/A	4	N/A		4		4	N/A	8	N/A	3	2	2		N/A		N/A	N/A	6	N/A	4	3	4		3		N/A	N/A	N/A	N/A	3	3	3		2		2	N/A	N/A
AG	2	Macro	Enamel hypoplastic defect - present	SMB 66B	30	30 to 40	< 23.5	F	labial/buccal	whole skull	N/A	0	N/A		0		0	N/A	0	N/A	1	0	0		N/A		N/A	N/A	0	N/A	0	0	0		0		N/A	N/A	N/A	N/A	0	0	0		0		0	N/A	N/A
AG	2	Macro	Enamel hypoplastic defect - present	SMB 66B	30	30 to 40	< 23.5	F	lingual	whole skull	N/A	0	N/A		1		0	N/A	1	N/A	0	0	1		N/A		N/A	N/A	1	N/A	0	0	0		1		N/A	N/A	N/A	N/A	0	0	0		1		1	N/A	N/A
AG	2	Macro	Enamel hypoplastic defect - type -linear	SMB 66B	30	30 to 40	< 23.5	F	labial/buccal	whole skull	N/A	0	N/A		0		0	N/A	0	N/A	2	0	0		N/A		N/A	N/A	0	N/A	0	0	0		0		N/A	N/A	N/A	N/A	0	0	0		0		0	N/A	N/A
AG	2	Macro	Enamel hypoplastic defect - type -linear	SMB 66B	30	30 to 40	< 23.5	F	lingual	whole skull	N/A	0	N/A		2		0	N/A	2	N/A	0	0	2		N/A		N/A	N/A	2	N/A	0	0	0		2		N/A	N/A	N/A	N/A	0	0	0		2		2	N/A	N/A
AG	2	Macro	Enamel hypoplastic defects-number of lines	SMB 66B	30	30 to 40	< 23.5	F	labial/buccal	whole skull	N/A	0	N/A		0		0	N/A	0	N/A	0	0	0		N/A		N/A	N/A	0	N/A	0	0	0		0		N/A	N/A	N/A	N/A	0	0	0		0		0	N/A	N/A
AG	2	Macro	Enamel hypoplastic defects-number of lines	SMB 66B	30	30 to 40	< 23.5	F	lingual	whole skull	N/A	0	N/A		0		0	N/A	0	N/A	0	0	0		N/A		N/A	N/A	0	N/A	0	0	0		0		N/A	N/A	N/A	N/A	0	0	0		0		0	N/A	N/A
AG	2	Macro	Enamel hypoplastic defect - type - pits	SMB 66B	30	30 to 40	< 23.5	F	labial/buccal	whole skull	N/A	0	N/A		0		0	N/A	0	N/A	1	0	0		N/A		N/A	N/A	0	N/A	0	0	0		0		N/A	N/A	N/A	N/A	0	0	0		0		0	N/A	N/A
AG	2	Macro	Enamel hypoplastic defect - type - pits	SMB 66B	30	30 to 40	< 23.5	F	lingual	whole skull	N/A	0	N/A		1		0	N/A	1	N/A	0	0	1		N/A		N/A	N/A	1	N/A	0	0	0		2		N/A	N/A	N/A	N/A	0	0	0		1		1	N/A	N/A
AG	2	Macro	Enamel hypoplastic defects-number of pits	SMB 66B	30	30 to 40	< 23.5	F	labial/buccal	whole skull	N/A	0	N/A		0		0	N/A	0	N/A	2	0	0		N/A		N/A	N/A	0	N/A	0	0	0		0		N/A	N/A	N/A	N/A	0	0	0		0		0	N/A	N/A
AG	2	Macro	Enamel hypoplastic defects-number of pits	SMB 66B	30	30 to 40	< 23.5	F	lingual	whole skull	N/A	0	N/A		2		0	N/A	2	N/A	0	0	2		N/A		N/A	N/A	2	N/A	0	0	0		1		N/A	N/A	N/A	N/A	0	0	0		2		2	N/A	N/A
AG	2	Macro	Enamel hypoplastic defect - measurement 1 (mm)	SMB 66B	30	30 to 40	< 23.5	F	labial/buccal	whole skull	N/A	0	N/A		0		0	N/A	0	N/A	5	0	0		N/A		N/A	N/A	0	N/A	0	0	0		0		N/A	N/A	N/A	N/A	0	0	0		0		0	N/A	N/A
AG	2	Macro	Enamel hypoplastic defect - measurement 1 (mm)	SMB 66B	30	30 to 40	< 23.5	F	lingual	whole skull	N/A	0	N/A		3		0	N/A	2	N/A	0	0	2		N/A		N/A	N/A	2	N/A	0	0	0		4.5		N/A	N/A	N/A	N/A	0	0	0		3		3	N/A	N/A
AG	2	Macro	Enamel hypoplastic defect - measurement 2 (mm)	SMB 66B	30	30 to 40	< 23.5	F	labial/buccal	whole skull	N/A	0	N/A		0		0	N/A	0	N/A	0	0	0		N/A		N/A	N/A	0	N/A	0	0	0		0		N/A	N/A	N/A	N/A	0	0	0		0		0	N/A	N/A
AG	2	Macro	Enamel hypoplastic defect - measurement 2 (mm)	SMB 66B	30	30 to 40	< 23.5	F	lingual	whole skull	N/A	0	N/A		0		0	N/A	0	N/A	0	0	0		N/A		N/A	N/A	0	N/A	0	0	0		0		N/A	N/A	N/A	N/A	0	0	0		0		0	N/A	N/A
AG	2	Macro	Enamel hypoplastic defect - measurement 3 (mm)	SMB 66B	30	30 to 40	< 23.5	F	labial/buccal	whole skull	N/A	0	N/A		0		0	N/A	0	N/A	0	0	0		N/A		N/A	N/A	0	N/A	0	0	0		0		N/A	N/A	N/A	N/A	0	0	0		0		0	N/A	N/A
AG	2	Macro	Enamel hypoplastic defect - measurement 3 (mm)	SMB 66B	30	30 to 40	< 23.5	F	lingual	whole skull	N/A	0	N/A		0		0	N/A	0	N/A	0	0	0		N/A		N/A	N/A	0	N/A	0	0	0		0		N/A	N/A	N/A	N/A	0	0	0		0		0	N/A	N/A
AG	2	Macro	Enamel hypoplastic defect - measurement 4 (mm)	SMB 66B	30	30 to 40	< 23.5	F	labial/buccal	whole skull	N/A	0	N/A		0		0	N/A	0	N/A	0	0	0		N/A		N/A	N/A	0	N/A	0	0	0		0		N/A	N/A	N/A	N/A	0	0	0		0		0	N/A	N/A
AG	2	Macro	Enamel hypoplastic defect - measurement 4 (mm)	SMB 66B	30	30 to 40	< 23.5	F	lingual	whole skull	N/A	0	N/A		0		0	N/A	0	N/A	0	0	0		N/A		N/A	N/A	0	N/A	0	0	0		0		N/A	N/A	N/A	N/A	0	0	0		0		0	N/A	N/A
AG	2	Macro	IGD - present	SMB 66B	30	30 to 40	< 23.5	F	internal	whole skull
AG	2	Radiographic	Inventory	SMB 66B	30	30 to 40	< 23.5	F	labial/buccal	whole skull	4	2	4		2		2	3	2	4	2	2	2		3		4	3	2	3	2	2	2		2		4	3	3	3	2	2	2		2		3	3	3
AG	2	Radiographic	Tooth Wear	SMB 66B	30	30 to 40	< 23.5	F	occlusal	whole skull	N/A	4	N/A		2		2	N/A	3	N/A	4	3	2		N/A		N/A	N/A	2	N/A	4	4	4		3		N/A	N/A	N/A	N/A	4	4	4		4		3	N/A	N/A
AG	2	Radiographic	Dental Trauma	SMB 66B	30	30 to 40	< 23.5	F	labial/buccal	whole skull	N/A	0	N/A		0		0	N/A	3*	N/A	0	0	0		N/A		N/A	N/A	0	N/A	0	0	0		0		N/A	N/A	N/A	N/A	2	0	0		0		0	N/A	N/A
AG	2	Radiographic	Dental Trauma	SMB 66B	30	30 to 40	< 23.5	F	lingual	whole skull
AG	2	Radiographic	Occlusion	SMB 66B	30	30 to 40	< 23.5	F	Occlusal	whole skull
AG	2	Radiographic	Overbite	SMB 66B	30	30 to 40	< 23.5	F	occlusal	whole skull
AG	2	Radiographic	Overjet	SMB 66B	30	30 to 40	< 23.5	F	occlusal	whole skull
AG	2	Radiographic	Caries - present on tooth	SMB 66B	30	30 to 40	< 23.5	F	All	whole skull	N/A	1	N/A		1		0	N/A	1	N/A	1	1	1		N/A		N/A	N/A	1	N/A	0	1	1		0			N/A	N/A	N/A	1	0	0		0		0	N/A	N/A
AG	2	Radiographic	Caries- location 1	SMB 66B	30	30 to 40	< 23.5	F	mesial	whole skull	N/A	1	N/A		1		0	N/A	2	N/A	1	2	1		N/A		N/A	N/A	2	N/A	0	1	1		0		N/A	N/A	N/A	N/A	2	0	0		0		N/A	N/A	N/A
AG	2	Radiographic	Caries- location 2	SMB 66B	30	30 to 40	< 23.5	F	distal	whole skull	N/A	2	N/A		2		0	N/A	2	N/A	2	1	2		N/A		N/A	N/A	2	N/A	0	2	2		0		N/A	N/A	N/A	N/A	1	0	0		0		N/A	N/A	N/A
AG	2	Radiographic	Caries- location 3	SMB 66B	30	30 to 40	< 23.5	F	occlusal	whole skull
AG	2	Radiographic	Caries- location 4	SMB 66B	30	30 to 40	< 23.5	F	labial/buccal	whole skull
AG	2	Radiographic	Caries- location 5	SMB 66B	30	30 to 40	< 23.5	F	lingual	whole skull
AG	2	Radiographic	Caries _ CEJ 1	SMB 66B	30	30 to 40	< 23.5	F	labial/buccal	whole skull	N/A	1	N/A		1		0	N/A	1	N/A	2	2	1		N/A		N/A	N/A	1	N/A	0	1	1		0		N/A	N/A	N/A	N/A	1	0	0		0		0	N/A	N/A
AG	2	Radiographic	Caries _ CEJ 2	SMB 66B	30	30 to 40	< 23.5	F	labial/buccal	whole skull	N/A	2	N/A		2		0	N/A	2	N/A	1	1	2		N/A		N/A	N/A	2	N/A	0	2	2		0		N/A	N/A	N/A	N/A	2	0	0		0		0	N/A	N/A
AG	2	Radiographic	Caries _ CEJ 3	SMB 66B	30	30 to 40	< 23.5	F	labial/buccal	whole skull	N/A	2	N/A		2		0	N/A	N/A	N/A	2	0	2		N/A		N/A	N/A	1	N/A	0	2	2		0		N/A	N/A	N/A	N/A	2	0	0		0		0	N/A	N/A
AG	2	Radiographic	Caries - Radiolucency	SMB 66B	30	30 to 40	< 23.5	F	labial/buccal	whole skull	N/A	1	N/A		1		0	N/A	1	N/A	3	3	3		N/A		N/A	N/A		N/A	0	1	3		0		N/A	N/A	N/A	N/A	3	0	0		0		0	N/A	N/A
AG	2	Radiographic	Alveolar status	SMB 66B	30	30 to 40	< 23.5	F	labial/buccal	whole skull
AG	2	Radiographic	Periodontal disease	SMB 66B	30	30 to 40	< 23.5	F	labial/buccal	whole skull
AG	2	Radiographic	Periodontal disease	SMB 66B	30	30 to 40	< 23.5	F	lingual	whole skull
AG	2	Radiographic	Enamel hypoplastic defect - present	SMB 66B	30	30 to 40	< 23.5	F	labial/buccal	whole skull
AG	2	Radiographic	Enamel hypoplastic defect - present	SMB 66B	30	30 to 40	< 23.5	F	lingual	whole skull
AG	2	Radiographic	Enamel hypoplastic defect - type -linear	SMB 66B	30	30 to 40	< 23.5	F	labial/buccal	whole skull
AG	2	Radiographic	Enamel hypoplastic defect - type -linear	SMB 66B	30	30 to 40	< 23.5	F	lingual	whole skull
AG	2	Radiographic	Enamel hypoplastic defects-number of lines	SMB 66B	30	30 to 40	< 23.5	F	labial/buccal	whole skull
AG	2	Radiographic	Enamel hypoplastic defects-number of lines	SMB 66B	30	30 to 40	< 23.5	F	lingual	whole skull
AG	2	Radiographic	Enamel hypoplastic defect - type - pits	SMB 66B	30	30 to 40	< 23.5	F	labial/buccal	whole skull
AG	2	Radiographic	Enamel hypoplastic defect - type - pits	SMB 66B	30	30 to 40	< 23.5	F	lingual	whole skull
AG	2	Radiographic	Enamel hypoplastic defects-number of pits	SMB 66B	30	30 to 40	< 23.5	F	labial/buccal	whole skull
AG	2	Radiographic	Enamel hypoplastic defects-number of pits	SMB 66B	30	30 to 40	< 23.5	F	lingual	whole skull
AG	2	Radiographic	Enamel hypoplastic defect - measurement 1 (mm)	SMB 66B	30	30 to 40	< 23.5	F	labial/buccal	whole skull
AG	2	Radiographic	Enamel hypoplastic defect - measurement 1 (mm)	SMB 66B	30	30 to 40	< 23.5	F	lingual	whole skull
AG	2	Radiographic	Enamel hypoplastic defect - measurement 2 (mm)	SMB 66B	30	30 to 40	< 23.5	F	labial/buccal	whole skull
AG	2	Radiographic	Enamel hypoplastic defect - measurement 2 (mm)	SMB 66B	30	30 to 40	< 23.5	F	lingual	whole skull
AG	2	Radiographic	Enamel hypoplastic defect - measurement 3 (mm)	SMB 66B	30	30 to 40	< 23.5	F	labial/buccal	whole skull
AG	2	Radiographic	Enamel hypoplastic defect - measurement 3 (mm)	SMB 66B	30	30 to 40	< 23.5	F	lingual	whole skull
AG	2	Radiographic	Enamel hypoplastic defect - measurement 4 (mm)	SMB 66B	30	30 to 40	< 23.5	F	labial/buccal	whole skull
AG	2	Radiographic	Enamel hypoplastic defect - measurement 4 (mm)	SMB 66B	30	30 to 40	< 23.5	F	lingual	whole skull
AG	2	Radiographic	IGD - present	SMB 66B	30	30 to 40	< 23.5	F	internal	whole skull
AG	2	L.v micro-CT	Inventory	SMB 66B	30	30 to 40	< 23.5	F	labial/buccal	whole skull	1	2	3		2		2	3	2	3	2	2	2		4		4	3	2	3	2	2	2		2		4	3	3	3	2	2	2		2		2	3	3
AG	2	L.v micro-CT	Tooth Wear	SMB 66B	30	30 to 40	< 23.5	F	occlusal	whole skull	0	3	0		4		3	0	2	0	4	3	3		0		0	0	3	0	5	5	5		4		3	0	0	0	5	5	5		2		3	0	0
AG	2	L.v micro-CT	Dental Trauma	SMB 66B	30	30 to 40	< 23.5	F	labial/buccal	whole skull	N/A	0	N/A		0		0	N/A	3	N/A	0	0	1		N/A		N/A	N/A	0	N/A	0	1	1		0		N/A	N/A	N/A	N/A	0	1	1		1		0	N/A	N/A
AG	2	L.v micro-CT	Dental Trauma	SMB 66B	30	30 to 40	< 23.5	F	lingual	whole skull	N/A	0	N/A		0		0	N/A	0	N/A	0	0	0		N/A		N/A	N/A	0	N/A	0	1	0		0		N/A	N/A	N/A	N/A	0	1	1		0		0	N/A	N/A
AG	2	L.v micro-CT	Occlusion	SMB 66B	30	30 to 40	< 23.5	F	occlusal	whole skull
AG	2	L.v micro-CT	Overbite	SMB 66B	30	30 to 40	< 23.5	F	occlusal	whole skull
AG	2	L.v micro-CT	Overjet	SMB 66B	30	30 to 40	< 23.5	F	occlusal	whole skull
AG	2	L.v micro-CT	Caries - present on tooth	SMB 66B	30	30 to 40	< 23.5	F	All	whole skull	N/A	0	N/A		1		0	N/A	N/A	N/A	1	1	1		N/A		N/A	N/A	0	N/A	0	1	0		1		N/A	N/A	N/A	N/A	1	0	1		1		0	N/A	N/A
AG	2	L.v micro-CT	Caries- location 1	SMB 66B	30	30 to 40	< 23.5	F	mesial	whole skull	N/A	0	N/A		1		0	N/A	N/A	N/A	1	2	2		N/A		N/A	N/A	0	N/A	0	1	0		2		N/A	N/A	N/A	N/A	1	0	2		1		0	N/A	N/A
AG	2	L.v micro-CT	Caries- location 2	SMB 66B	30	30 to 40	< 23.5	F	distal	whole skull	N/A	0	N/A		2		0	N/A	N/A	N/A	2	1	1		N/A		N/A	N/A	0	N/A	0	1	0		2		N/A	N/A	N/A	N/A	2	0	1		2		0	N/A	N/A
AG	2	L.v micro-CT	Caries- location 3	SMB 66B	30	30 to 40	< 23.5	F	occlusal	whole skull	N/A	0	N/A		2		0	N/A	N/A	N/A	2	2	2		N/A		N/A	N/A	0	N/A	0	2	0		2		N/A	N/A	N/A	N/A	2	0	2		2		0	N/A	N/A
AG	2	L.v micro-CT	Caries- location 4	SMB 66B	30	30 to 40	< 23.5	F	labial/buccal	whole skull	N/A	0	N/A		2		0	N/A	N/A	N/A	2	0	2		N/A		N/A	N/A	0	N/A	0	2	0		1		N/A	N/A	N/A	N/A	2	0	2		2		0	N/A	N/A
AG	2	L.v micro-CT	Caries- location 5	SMB 66B	30	30 to 40	< 23.5	F	lingual	whole skull	N/A	0	N/A		2		0	N/A	N/A	N/A	2	2	2		N/A		N/A	N/A	0	N/A	0	2	0		2		N/A	N/A	N/A	N/A	2	0	2		2		0	N/A	N/A
AG	2	L.v micro-CT	Caries _ CEJ 1	SMB 66B	30	30 to 40	< 23.5	F	labial/buccal	whole skull	N/A	0	N/A		1		0	N/A	N/A	N/A	1	2	1		N/A		N/A	N/A	0	N/A	0	2	0		2		N/A	N/A	N/A	N/A	0	0	2		2		0	N/A	N/A
AG	2	L.v micro-CT	Caries _ CEJ 2	SMB 66B	30	30 to 40	< 23.5	F	labial/buccal	whole skull	N/A	0	N/A		2		0	N/A	N/A	N/A	2	1	2		N/A		N/A	N/A	0	N/A	0	1	0		1		N/A	N/A	N/A	N/A	0	0	1		2		0	N/A	N/A
AG	2	L.v micro-CT	Caries _ CEJ 3	SMB 66B	30	30 to 40	< 23.5	F	labial/buccal	whole skull	N/A	0	N/A		2		0	N/A	N/A	N/A	2	2	2		N/A		N/A	N/A	0	N/A	0	2	0		2		N/A	N/A	N/A	N/A	0	0	2		1		0	N/A	N/A
AG	2	L.v micro-CT	Caries - Radiolucency	SMB 66B	30	30 to 40	< 23.5	F	labial/buccal	whole skull	N/A	0	N/A		1		0	N/A	N/A	N/A	1	2	3		N/A		N/A	N/A	0	N/A	0	2	0		2		N/A	N/A	N/A	N/A	2	0	1		1		0	N/A	N/A
AG	2	L.v micro-CT	Alveolar status	SMB 66B	30	30 to 40	< 23.5	F	labial/buccal	whole skull					3		4	0	0	0					0		0	0	3	0					4		4	0	0	0					4		0	0	0
AG	2	L.v micro-CT	Periodontal disease	SMB 66B	30	30 to 40	< 23.5	F	labial/buccal	whole skull	N/A	3.27	N/A		5.32		3.74	N/A	N/A	N/A	3.58	4.17	3.6		N/A		N/A	N/A	4.74	N/A	3.84	4	6.64		5.17		N/A	N/A	N/A	N/A	4.17	4.9	6.19		5.6		4.69	N/A	N/A
AG	2	L.v micro-CT	Periodontal disease	SMB 66B	30	30 to 40	< 23.5	F	lingual	whole skull	N/A	2.65	N/A		2.65		4.54	N/A	5.88	N/A	2.69	2.5	2.28		N/A		N/A	N/A	5.4	N/A	5.53	4.28	3.6		4.3		N/A	N/A	N/A	N/A	4.7	4.9	4.41		4.08		3.86	N/A	N/A
AG	2	L.v micro-CT	Enamel hypoplastic defect - present	SMB 66B	30	30 to 40	< 23.5	F	labial/buccal	whole skull	N/A	0	N/A		0		1	N/A	N/A	N/A	1	1	1		N/A		N/A	N/A	0	N/A	1	1	1		1		N/A	N/A	N/A	N/A	0	0	0		1		0	N/A	N/A
AG	2	L.v micro-CT	Enamel hypoplastic defect - present	SMB 66B	30	30 to 40	< 23.5	F	lingual	whole skull	N/A	1	N/A		0		0	N/A	1	N/A	0	0	1		N/A		N/A	N/A	0	N/A	1	1	1		1		N/A	N/A	N/A	N/A	0	1	1		1		0	N/A	N/A
AG	2	L.v micro-CT	Enamel hypoplastic defect - type -linear	SMB 66B	30	30 to 40	< 23.5	F	labial/buccal	whole skull	N/A	0	N/A		0		2	N/A	N/A	N/A	2	2	2		N/A		N/A	N/A	0	N/A	1	1	2		2		N/A	N/A	N/A	N/A	0	0	0		2		0	N/A	N/A
AG	2	L.v micro-CT	Enamel hypoplastic defect - type -linear	SMB 66B	30	30 to 40	< 23.5	F	lingual	whole skull	N/A	2	N/A		0		0	N/A	2	N/A	0	0	2		N/A		N/A	N/A	0	N/A	2	2	2		2		N/A	N/A	N/A	N/A	0	2	2		2		0	N/A	N/A
AG	2	L.v micro-CT	Enamel hypoplastic defects-number of lines	SMB 66B	30	30 to 40	< 23.5	F	labial/buccal	whole skull	N/A	0	N/A		0		0	N/A	N/A	N/A	0	0	0		N/A		N/A	N/A	0	N/A	2	2	0		0		N/A	N/A	N/A	N/A	0	0	0		0		0	N/A	N/A
AG	2	L.v micro-CT	Enamel hypoplastic defects-number of lines	SMB 66B	30	30 to 40	< 23.5	F	lingual	whole skull	N/A	0	N/A		0		0	N/A	0	N/A	0	0	0		N/A		N/A	N/A	0	N/A	0	0	0		0		N/A	N/A	N/A	N/A	0	0	0		0		0	N/A	N/A
AG	2	L.v micro-CT	Enamel hypoplastic defect - type - pits	SMB 66B	30	30 to 40	< 23.5	F	labial/buccal	whole skull	N/A	0	N/A		0		1	N/A	N/A	N/A	1	1	1		N/A		N/A	N/A	0	N/A	2	2	1		1		N/A	N/A	N/A	N/A	0	0	0		1		0	N/A	N/A
AG	2	L.v micro-CT	Enamel hypoplastic defect - type - pits	SMB 66B	30	30 to 40	< 23.5	F	lingual	whole skull	N/A	1	N/A		0		0	N/A	1	N/A	0	0	1		N/A		N/A	N/A	0	N/A	1	2	1		1		N/A	N/A	N/A	N/A	0	1	1		1		0	N/A	N/A
AG	2	L.v micro-CT	Enamel hypoplastic defects-number of pits	SMB 66B	30	30 to 40	< 23.5	F	labial/buccal	whole skull	N/A	0	N/A		0		1	N/A	N/A	N/A	1	1	2		N/A		N/A	N/A	0	N/A	0	0	2		2		N/A	N/A	N/A	N/A	0	0	0		2		0	N/A	N/A
AG	2	L.v micro-CT	Enamel hypoplastic defects-number of pits	SMB 66B	30	30 to 40	< 23.5	F	lingual	whole skull	N/A	1	N/A		0		0	N/A	1	N/A	0	0	1		N/A		N/A	N/A	0	N/A	2	2	2		1		N/A	N/A	N/A	N/A	0	2	2		1		0	N/A	N/A
AG	2	L.v micro-CT	Enamel hypoplastic defect - measurement 1 (mm)	SMB 66B	30	30 to 40	< 23.5	F	labial/buccal	whole skull	N/A	0	N/A		0		2.83	N/A	N/A	N/A	8	6.25	1.52		N/A		N/A	N/A	0	N/A	2.52	2.48	1.05		2.37		N/A	N/A	N/A	N/A	0	0	1.72		1		0	N/A	N/A
AG	2	L.v micro-CT	Enamel hypoplastic defect - measurement 1 (mm)	SMB 66B	30	30 to 40	< 23.5	F	lingual	whole skull	N/A	2.36	N/A		0		0	N/A	2.59	N/A	0	0	2.8		N/A		N/A	N/A	0	N/A	1.82	1.99	4.69		4		N/A	N/A	N/A	N/A	0	4.95	2.41		3.47		0	N/A	N/A
AG	2	L.v micro-CT	Enamel hypoplastic defect - measurement 2 (mm)	SMB 66B	30	30 to 40	< 23.5	F	labial/buccal	whole skull	N/A	0	N/A		0		0	N/A	N/A	N/A	0	0	0		N/A		N/A	N/A	0	N/A	3.65	3.73	0		0		N/A	N/A	N/A	N/A	0	0	0		0		0	N/A	N/A
AG	2	L.v micro-CT	Enamel hypoplastic defect - measurement 2 (mm)	SMB 66B	30	30 to 40	< 23.5	F	lingual	whole skull	N/A	0	N/A		0		0	N/A	0	N/A	0	0	0		N/A		N/A	N/A	0	N/A	4.3	3.51	0		0		N/A	N/A	N/A	N/A	0	6.05	3.3		0		0	N/A	N/A
AG	2	L.v micro-CT	Enamel hypoplastic defect - measurement 3 (mm)	SMB 66B	30	30 to 40	< 23.5	F	labial/buccal	whole skull	N/A	0	N/A		0		0	N/A	N/A	N/A	0	0	0		N/A		N/A	N/A	0	N/A	0	0	0		0		N/A	N/A	N/A	N/A	0	0	0		0		0	N/A	N/A
AG	2	L.v micro-CT	Enamel hypoplastic defect - measurement 3 (mm)	SMB 66B	30	30 to 40	< 23.5	F	lingual	whole skull	N/A	0	N/A		0		0	N/A	0	N/A	0	0	0		N/A		N/A	N/A	0	N/A	0	5.99	0		0		N/A	N/A	N/A	N/A	0	0	6.47		0		0	N/A	N/A
AG	2	L.v micro-CT	Enamel hypoplastic defect - measurement 4 (mm)	SMB 66B	30	30 to 40	< 23.5	F	labial/buccal	whole skull	N/A	0	N/A		0		0	N/A	N/A	N/A	0	0	0		N/A		N/A	N/A	0	N/A	0	0	0		0		N/A	N/A	N/A	N/A	0	0	0		0		0	N/A	N/A
AG	2	L.v micro-CT	Enamel hypoplastic defect - measurement 4 (mm)	SMB 66B	30	30 to 40	< 23.5	F	lingual	whole skull	N/A	0	N/A		0		0	N/A	0	N/A	0	0	0		N/A		N/A	N/A	0	N/A	0	0	0		0		N/A	N/A	N/A	N/A	0	0	0		0		0	N/A	N/A
AG	2	L.v micro-CT	IGD - present	SMB 66B	30	30 to 40	< 23.5	F	internal	whole skull	N/A	0	N/A		0		0	N/A	0	N/A	0	0	0		N/A		N/A	N/A	N/A	N/A	0	0	0		0		N/A	N/A	N/A	N/A	0	0	0		0		0	N/A	N/A
AG	2	S.v micro-CT	Inventory	SMB 66B	30	30 to 40		F	labial/buccal	Individual tooth samples
AG	2	S.v micro-CT	Tooth Wear	SMB 66B	30	30 to 40		F	occlusal	Individual tooth samples	N/A	3	N/A		3		2	N/A	2	N/A	N/A	N/A	3		N/A		N/A	N/A	N/A	N/A	N/A	N/A	N/A		N/A		N/A	N/A	N/A	N/A	N/A	N/A	N/A		N/A		N/A	N/A	N/A
AG	2	S.v micro-CT	Dental Trauma	SMB 66B	30	30 to 40		F	labial/buccal	Individual tooth samples	N/A	1	N/A		3		0	N/A	3	N/A	N/A	N/A	1		N/A
AG	2	S.v micro-CT	Dental Trauma	SMB 66B	30	30 to 40		F	lingual	Individual tooth samples	N/A	2	N/A		3		0	N/A	0	N/A	N/A	N/A	0		N/A
AG	2	S.v micro-CT	Occlusion	SMB 66B	30	30 to 40		F	occlusal	Individual tooth samples	N/A		N/A					N/A		N/A	N/A	N/A			N/A
AG	2	S.v micro-CT	Overbite	SMB 66B	30	30 to 40		F	occlusal	Individual tooth samples	N/A		N/A					N/A		N/A	N/A	N/A			N/A
AG	2	S.v micro-CT	Overjet	SMB 66B	30	30 to 40		F	occlusal	Individual tooth samples	N/A		N/A					N/A		N/A	N/A	N/A			N/A
AG	2	S.v micro-CT	Caries - present on tooth	SMB 66B	30	30 to 40		F	All	Individual tooth samples	N/A	3	N/A		1		0	N/A	0	N/A	N/A	N/A	1		N/A
AG	2	S.v micro-CT	Caries- location 1	SMB 66B	30	30 to 40		F	mesial	Individual tooth samples	N/A	1	N/A		1		0	N/A	0	N/A	N/A	N/A	2		N/A
AG	2	S.v micro-CT	Caries- location 2	SMB 66B	30	30 to 40		F	distal	Individual tooth samples	N/A	2	N/A		2		0	N/A	0	N/A	N/A	N/A	1		N/A
AG	2	S.v micro-CT	Caries- location 3	SMB 66B	30	30 to 40		F	occlusal	Individual tooth samples	N/A	2	N/A		2		0	N/A	0	N/A	N/A	N/A	2		N/A
AG	2	S.v micro-CT	Caries- location 4	SMB 66B	30	30 to 40		F	labial/buccal	Individual tooth samples	N/A	2	N/A		2		0	N/A	0	N/A	N/A	N/A	2		N/A
AG	2	S.v micro-CT	Caries- location 5	SMB 66B	30	30 to 40		F	lingual	Individual tooth samples	N/A	2	N/A		2		0	N/A	0	N/A	N/A	N/A	2		N/A
AG	2	S.v micro-CT	Caries _ CEJ 1	SMB 66B	30	30 to 40		F	labial/buccal	Individual tooth samples	N/A	1	N/A		1		0	N/A	0	N/A	N/A	N/A	2		N/A
AG	2	S.v micro-CT	Caries _ CEJ 2	SMB 66B	30	30 to 40		F	labial/buccal	Individual tooth samples	N/A	2	N/A		2		0	N/A	0	N/A	N/A	N/A	1		N/A
AG	2	S.v micro-CT	Caries _ CEJ 3	SMB 66B	30	30 to 40		F	labial/buccal	Individual tooth samples	N/A	2	N/A		2		0	N/A	0	N/A	N/A	N/A	2		N/A
AG	2	S.v micro-CT	Caries - Radiolucency	SMB 66B	30	30 to 40		F	labial/buccal	Individual tooth samples	N/A	3	N/A		1		0	N/A	0	N/A	N/A	N/A	1		N/A
AG	2	S.v micro-CT	Alveolar status	SMB 66B	30	30 to 40		F	labial/buccal	Individual tooth samples	N/A		N/A					N/A		N/A	N/A	N/A			N/A
AG	2	S.v micro-CT	Periodontal disease	SMB 66B	30	30 to 40		F	labial/buccal	Individual tooth samples	N/A		N/A					N/A		N/A	N/A	N/A			N/A
AG	2	S.v micro-CT	Periodontal disease	SMB 66B	30	30 to 40		F	labial/buccal	Individual tooth samples	N/A		N/A					N/A		N/A	N/A	N/A			N/A
AG	2	S.v micro-CT	Enamel hypoplastic defect - present	SMB 66B	30	30 to 40		F	labial/buccal	Individual tooth samples	N/A	0	N/A		1		1	N/A	N/A	N/A	N/A	N/A	1		N/A
AG	2	S.v micro-CT	Enamel hypoplastic defect - present	SMB 66B	30	30 to 40		F	lingual	Individual tooth samples	N/A	1	N/A		0		0	N/A	1	N/A	N/A	N/A	1		N/A
AG	2	S.v micro-CT	Enamel hypoplastic defect - type -linear	SMB 66B	30	30 to 40		F	labial/buccal	Individual tooth samples	N/A	0	N/A		2		2	N/A	N/A	N/A	N/A	N/A	2		N/A
AG	2	S.v micro-CT	Enamel hypoplastic defect - type -linear	SMB 66B	30	30 to 40		F	lingual	Individual tooth samples	N/A	2	N/A		0		0	N/A	2	N/A	N/A	N/A	2		N/A
AG	2	S.v micro-CT	Enamel hypoplastic defects-number of lines	SMB 66B	30	30 to 40		F	labial/buccal	Individual tooth samples	N/A	0	N/A		0		0	N/A	N/A	N/A	N/A	N/A	0		N/A
AG	2	S.v micro-CT	Enamel hypoplastic defects-number of lines	SMB 66B	30	30 to 40		F	lingual	Individual tooth samples	N/A	0	N/A		0		0	N/A	0	N/A	N/A	N/A	0		N/A
AG	2	S.v micro-CT	Enamel hypoplastic defect - type - pits	SMB 66B	30	30 to 40		F	labial/buccal	Individual tooth samples	N/A	0	N/A		1		1	N/A	N/A	N/A	N/A	N/A	1		N/A
AG	2	S.v micro-CT	Enamel hypoplastic defect - type - pits	SMB 66B	30	30 to 40		F	lingual	Individual tooth samples	N/A	1	N/A		0		0	N/A	1	N/A	N/A	N/A	1		N/A
AG	2	S.v micro-CT	Enamel hypoplastic defects-number of pits	SMB 66B	30	30 to 40		F	labial/buccal	Individual tooth samples	N/A	0	N/A		1		2	N/A	N/A	N/A	N/A	N/A	2		N/A
AG	2	S.v micro-CT	Enamel hypoplastic defects-number of pits	SMB 66B	30	30 to 40		F	lingual	Individual tooth samples	N/A	1	N/A		0		0	N/A	2	N/A	N/A	N/A	2		N/A
AG	2	S.v micro-CT	Enamel hypoplastic defect - measurement 1 (mm)	SMB 66B	30	30 to 40		F	labial/buccal	Individual tooth samples	N/A	0	N/A		2.05		1.85	N/A	N/A	N/A	N/A	N/A	1.93		N/A
AG	2	S.v micro-CT	Enamel hypoplastic defect - measurement 1 (mm)	SMB 66B	30	30 to 40		F	lingual	Individual tooth samples	N/A	2.78	N/A		0		0	N/A	2.01	N/A	N/A	N/A	4.37		N/A
AG	2	S.v micro-CT	Enamel hypoplastic defect - measurement 2 (mm)	SMB 66B	30	30 to 40		F	labial/buccal	Individual tooth samples	N/A	0	N/A		0		3.27	N/A	N/A	N/A	N/A	N/A	0		N/A
AG	2	S.v micro-CT	Enamel hypoplastic defect - measurement 2 (mm)	SMB 66B	30	30 to 40		F	lingual	Individual tooth samples	N/A	0	N/A		0		0	N/A	3.8	N/A	N/A	N/A	0		N/A
AG	2	S.v micro-CT	Enamel hypoplastic defect - measurement 3 (mm)	SMB 66B	30	30 to 40		F	labial/buccal	Individual tooth samples	N/A	0	N/A		0		4.76	N/A	N/A	N/A	N/A	N/A	0		N/A
AG	2	S.v micro-CT	Enamel hypoplastic defect - measurement 3 (mm)	SMB 66B	30	30 to 40		F	lingual	Individual tooth samples	N/A	0	N/A		0		0	N/A	0	N/A	N/A	N/A	0		N/A
AG	2	S.v micro-CT	Enamel hypoplastic defect - measurement 4 (mm)	SMB 66B	30	30 to 40		F	labial/buccal	Individual tooth samples	N/A	0	N/A		0		0	N/A	N/A	N/A	N/A	N/A	0		N/A
AG	2	S.v micro-CT	Enamel hypoplastic defect - measurement 4 (mm)	SMB 66B	30	30 to 40		F	lingual	Individual tooth samples	N/A	0	N/A		0		0	N/A	0	N/A	N/A	N/A	0		N/A
AG	2	S.v micro-CT	IGD - present	SMB 66B	30	30 to 40		F	internal	Individual tooth samples	N/A	0	N/A		0		0	N/A	0	N/A	N/A	N/A	0		N/A
MM	1	Macro	Inventory	SMB 66B	30	30 to 40	< 23.5	F	labial/buccal	whole skull	4	2	3		2		2	4	2	3	2	2	2		4		4	2	3	3	2	2	2		2		4	3	3	3	2	2	2		2		2	3	3
MM	1	Macro	Tooth Wear	SMB 66B	30	30 to 40	< 23.5	F	occlusal	whole skull	N/A	3	0		3		1	0	1	0	4	2	2		0		0	1	0	0	4	4	3		2		0	0	0	0	4	4	2		1		2	0	0
MM	1	Macro	Dental Trauma	SMB 66B	30	30 to 40	< 23.5	F	labial/buccal	whole skull	3	0	N/A		0		0	N/A	0	N/A	0	0	0		N/A		N/A	N/A	0	N/A	0	0	0		0		0	0	N/A	N/A	0	0	0		0		0	N/A	N/A
MM	1	Macro	Dental Trauma	SMB 66B	30	30 to 40	< 23.5	F	lingual	whole skull	3	0	N/A		0		0	N/A	2	N/A	0	0	0		N/A		N/A	N/A	0	N/A	0	0	0		0		0	0	N/A	N/A	0	0	0		0		0	N/A	N/A
MM	1	Macro	Occlusion	SMB 66B	30	30 to 40	< 23.5	F	occlusal	whole skull
MM	1	Macro	Overbite	SMB 66B	30	30 to 40	< 23.5	F	labial/buccal	whole skull	N/A	1	N/A								2	1	0
MM	1	Macro	Overjet	SMB 66B	30	30 to 40	< 23.5	F	labial/buccal	whole skull	N/A	5	N/A								4	3	1
MM	1	Macro	Caries - present on tooth	SMB 66B	30	30 to 40	< 23.5	F	All	whole skull	N/A	1	N/A		1		0	N/A	1	N/A	1	0	0		N/A		N/A	1	N/A	N/A	0	0	0		1		N/A	N/A	N/A	N/A	0	0	0		1		1	N/A	N/A
MM	1	Macro	Caries- location 1	SMB 66B	30	30 to 40	< 23.5	F	mesial	whole skull	N/A	1	N/A		1		0	N/A	2	N/A	1	0	1		N/A		N/A	2	N/A	N/A	0	0	0		2		N/A	N/A	N/A	N/A	0	0	0		2		1	N/A	N/A
MM	1	Macro	Caries- location 2	SMB 66B	30	30 to 40	< 23.5	F	distal	whole skull	N/A	2	N/A		2		0	N/A	2	N/A	2	0	0		N/A		N/A	3	N/A	N/A	0	0	0		2		N/A	N/A	N/A	N/A	0	0	0		2		2	N/A	N/A
MM	1	Macro	Caries- location 3	SMB 66B	30	30 to 40	< 23.5	F	occlusal	whole skull	N/A	2	N/A		2		0	N/A	1	N/A	2	0	0		N/A		N/A	1	N/A	N/A	0	0	0		2		N/A	N/A	N/A	N/A	0	0	0		1		2	N/A	N/A
MM	1	Macro	Caries- location 4	SMB 66B	30	30 to 40	< 23.5	F	labial/buccal	whole skull	N/A	2	N/A		2		0	N/A	2	N/A	2	0	0		N/A		N/A	2	2	N/A	0	0	0		1		N/A	N/A	N/A	N/A	0	0	0		2		2	N/A	N/A
MM	1	Macro	Caries- location 5	SMB 66B	30	30 to 40	< 23.5	F	lingual	whole skull	N/A	2	N/A		2		0	N/A	2	N/A	2	0	0		N/A		N/A	2	N/A	N/A	0	0	0		2		N/A	N/A	N/A	N/A	0	0	0		2		2	N/A	N/A
MM	1	Macro	Caries _ CEJ 1	SMB 66B	30	30 to 40	< 23.5	F	labial/buccal	whole skull	N/A	2	N/A		1		0	N/A	1	N/A	1	0	0		N/A		N/A	1	N/A	N/A	0	0	0		2		N/A	N/A	N/A	N/A	0	0	0		1		1	N/A	N/A
MM	1	Macro	Caries _ CEJ 2	SMB 66B	30	30 to 40	< 23.5	F	labial/buccal	whole skull	N/A	2	N/A		2		0	N/A	2	N/A	2	0	0		N/A		N/A	2	N/A	N/A	0	0	0		2		N/A	N/A	N/A	N/A	0	0	0		2		2	N/A	N/A
MM	1	Macro	Caries _ CEJ 3	SMB 66B	30	30 to 40	< 23.5	F	labial/buccal	whole skull	N/A	1	N/A		1		1	N/A	1	N/A	2	0	2		N/A		N/A	N/A	2	N/A	2	1	2		2		N/A	N/A	N/A	N/A	2	1	1		1		2	N/A	N/A
MM	1	Macro	Caries - Radiolucency	SMB 66B	30	30 to 40	< 23.5	F	labial/buccal	whole skull
MM	1	Macro	Alveolar status	SMB 66B	30	30 to 40	< 23.5	F	labial/buccal	whole skull					3		3	0	2	0					0		0	0	0	0					3		4	0	0	0					4		4	0	0
MM	1	Macro	Periodontal disease	SMB 66B	30	30 to 40	< 23.5	F	labial/buccal	whole skull	N/A	3	N/A		5		4	N/A	N/A	N/A	2	2	4		N/A		N/A	5	N/A	N/A	4	3	7		6		N/A	N/A	N/A	N/A	5	5	7		5		5	N/A	N/A
MM	1	Macro	Periodontal disease	SMB 66B	30	30 to 40	< 23.5	F	lingual	whole skull	N/A	4	N/A		4		4	N/A	8	N/A	3	2	2		N/A		N/A	7	N/A	N/A	6	4	5		3		N/A	N/A	N/A	N/A	6	6	6		4		4	N/A	N/A
MM	1	Macro	Enamel hypoplastic defect - present	SMB 66B	30	30 to 40	< 23.5	F	labial/buccal	whole skull	N/A	0	N/A		0		0	N/A	0	N/A	0	0	0		N/A		N/A	N/A	0	N/A	0	0	0		0		N/A	N/A	N/A	N/A	0	0	0		0		0	N/A	N/A
MM	1	Macro	Enamel hypoplastic defect - present	SMB 66B	30	30 to 40	< 23.5	F	lingual	whole skull	N/A	0	N/A		0		0	N/A	0	N/A	0	0	0		N/A		N/A	N/A	0	N/A	0	0	0		0		N/A	N/A	N/A	N/A	0	0	0		1		1	N/A	N/A
MM	1	Macro	Enamel hypoplastic defect - type -linear	SMB 66B	30	30 to 40	< 23.5	F	labial/buccal	whole skull	N/A	0	N/A		0		0	N/A	0	N/A	0	0	0		N/A		N/A	N/A	0	N/A	0	0	0		0		N/A	N/A	N/A	N/A	0	0	0		0		0	N/A	N/A
MM	1	Macro	Enamel hypoplastic defect - type -linear	SMB 66B	30	30 to 40	< 23.5	F	lingual	whole skull	N/A	0	N/A		0		0	N/A	0	N/A	0	0	0		N/A		N/A	N/A	0	N/A	0	0	0		0		N/A	N/A	N/A	N/A	0	0	0		0		0	N/A	N/A
MM	1	Macro	Enamel hypoplastic defects-number of lines	SMB 66B	30	30 to 40	< 23.5	F	labial/buccal	whole skull	N/A	0	N/A		0		0	N/A	0	N/A	0	0	0		N/A		N/A	N/A	0	N/A	0	0	0		0		N/A	N/A	N/A	N/A	0	0	0		0		0	N/A	N/A
MM	1	Macro	Enamel hypoplastic defects-number of lines	SMB 66B	30	30 to 40	< 23.5	F	lingual	whole skull	N/A	0	N/A		0		0	N/A	0	N/A	0	0	0		N/A		N/A	N/A	0	N/A	0	0	0		0		N/A	N/A	N/A	N/A	0	0	0		0		0	N/A	N/A
MM	1	Macro	Enamel hypoplastic defect - type - pits	SMB 66B	30	30 to 40	< 23.5	F	labial/buccal	whole skull	N/A	0	N/A		0		0	N/A	0	N/A	0	0	0		N/A		N/A	N/A	0	N/A	0	0	0		0		N/A	N/A	N/A	N/A	0	0	0		0		0	N/A	N/A
MM	1	Macro	Enamel hypoplastic defect - type - pits	SMB 66B	30	30 to 40	< 23.5	F	lingual	whole skull	N/A	0	N/A		0		0	N/A	0	N/A	0	0	0		N/A		N/A	N/A	0	N/A	0	0	0		0		N/A	N/A	N/A	N/A	0	0	0		0		0	N/A	N/A
MM	1	Macro	Enamel hypoplastic defects-number of pits	SMB 66B	30	30 to 40	< 23.5	F	labial/buccal	whole skull	N/A	0	N/A		0		0	N/A	0	N/A	0	0	0		N/A		N/A	N/A	0	N/A	0	0	0		0		N/A	N/A	N/A	N/A	0	0	0		0		0	N/A	N/A
MM	1	Macro	Enamel hypoplastic defects-number of pits	SMB 66B	30	30 to 40	< 23.5	F	lingual	whole skull	N/A	0	N/A		0		0	N/A	0	N/A	0	0	0		N/A		N/A	N/A	0	N/A	0	0	0		0		N/A	N/A	N/A	N/A	0	0	0		0		0	N/A	N/A
MM	1	Macro	Enamel hypoplastic defect - measurement 1 (mm)	SMB 66B	30	30 to 40	< 23.5	F	labial/buccal	whole skull	N/A	0	N/A		0		0	N/A	0	N/A	0	0	0		N/A		N/A	N/A	0	N/A	0	0	0		0		N/A	N/A	N/A	N/A	0	0	0		0		0	N/A	N/A
MM	1	Macro	Enamel hypoplastic defect - measurement 1 (mm)	SMB 66B	30	30 to 40	< 23.5	F	lingual	whole skull	N/A	0	N/A		0		0	N/A	0	N/A	0	0	0		N/A		N/A	N/A	0	N/A	0	0	0		0		N/A	N/A	N/A	N/A	0	0	0		0		0	N/A	N/A
MM	1	Macro	Enamel hypoplastic defect - measurement 2 (mm)	SMB 66B	30	30 to 40	< 23.5	F	labial/buccal	whole skull	N/A	0	N/A		0		0	N/A	0	N/A	0	0	0		N/A		N/A	N/A	0	N/A	0	0	0		0		N/A	N/A	N/A	N/A	0	0	0		0		0	N/A	N/A
MM	1	Macro	Enamel hypoplastic defect - measurement 2 (mm)	SMB 66B	30	30 to 40	< 23.5	F	lingual	whole skull	N/A	0	N/A		0		0	N/A	0	N/A	0	0	0		N/A		N/A	N/A	0	N/A	0	0	0		0		N/A	N/A	N/A	N/A	0	0	0		0		0	N/A	N/A
MM	1	Macro	Enamel hypoplastic defect - measurement 3 (mm)	SMB 66B	30	30 to 40	< 23.5	F	labial/buccal	whole skull	N/A	0	N/A		0		0	N/A	0	N/A	0	0	0		N/A		N/A	N/A	0	N/A	0	0	0		0		N/A	N/A	N/A	N/A	0	0	0		0		0	N/A	N/A
MM	1	Macro	Enamel hypoplastic defect - measurement 3 (mm)	SMB 66B	30	30 to 40	< 23.5	F	lingual	whole skull	N/A	0	N/A		0		0	N/A	0	N/A	0	0	0		N/A		N/A	N/A	0	N/A	0	0	0		0		N/A	N/A	N/A	N/A	0	0	0		0		0	N/A	N/A
MM	1	Macro	Enamel hypoplastic defect - measurement 4 (mm)	SMB 66B	30	30 to 40	< 23.5	F	labial/buccal	whole skull	N/A	0	N/A		0		0	N/A	0	N/A	0	0	0		N/A		N/A	N/A	0	N/A	0	0	0		0		N/A	N/A	N/A	N/A	0	0	0		0		0	N/A	N/A
MM	1	Macro	Enamel hypoplastic defect - measurement 4 (mm)	SMB 66B	30	30 to 40	< 23.5	F	lingual	whole skull	N/A	0	N/A		0		0	N/A	0	N/A	0	0	0		N/A		N/A	N/A	0	N/A	0	0	0		0		N/A	N/A	N/A	N/A	0	0	0		0		0	N/A	N/A
MM	1	Macro	IGD - present	SMB 66B	30	30 to 40	< 23.5	F	internal	whole skull
JW	1	Radiographic	Inventory	SMB 66B	30	30 to 40	< 23.5	F	labial/buccal	whole skull	4	2	4		2		2	3	2	4	2	2	2		3		4	3	2	3	2	2	2		2		4	3	3	3	2	2	2		2		3	3	3
JW	1	Radiographic	Tooth Wear	SMB 66B	30	30 to 40	< 23.5	F	occlusal	whole skull	0	3	0		2		2	0	2	0	3	2	2		0		0	0	2	0	3	3	3		2		0	0	0	0	3	3	3		2		2	0	0
JW	1	Radiographic	Dental Trauma	SMB 66B	30	30 to 40	< 23.5	F	labial/buccal	whole skull	3	0	N/A		0		0	N/A	0	N/A	0	0	0		N/A		N/A	N/A	0	N/A	0	0	0		0		N/A	N/A	N/A	N/A	0	0	0		0		0	N/A	N/A
JW	1	Radiographic	Dental Trauma	SMB 66B	30	30 to 40	< 23.5	F	lingual	whole skull
JW	1	Radiographic	Occlusion	SMB 66B	30	30 to 40	< 23.5	F	Occlusal	whole skull
JW	1	Radiographic	Overbite	SMB 66B	30	30 to 40	< 23.5	F	occlusal	whole skull
JW	1	Radiographic	Overjet	SMB 66B	30	30 to 40	< 23.5	F	occlusal	whole skull
DH	1	Radiographic	Caries - present on tooth	SMB 66B	30	30 to 40	< 23.5	F	All	whole skull	N/A	0	N/A		1		0	N/A	1	N/A	1	0	0		N/A		N/A	N/A	1	N/A	0	0	0		0		NA	N/A	N/A	N/A	0	0	0		0		0	N/A	N/A
DH	1	Radiographic	Caries- location 1	SMB 66B	30	30 to 40	< 23.5	F	mesial	whole skull	N/A	0	N/A		1		0	N/A	2	N/A	1	0	0		N/A		N/A	N/A	2	N/A	0	0	0		0		N/A	N/A	N/A	N/A	0	0	0		0		0	N/A	N/A
DH	1	Radiographic	Caries- location 2	SMB 66B	30	30 to 40	< 23.5	F	distal	whole skull	N/A	0	N/A		2		0	N/A	2	N/A	2	0	0		N/A		N/A	N/A	2	N/A	0	0	0		0		N/A	N/A	N/A	N/A	0	0	0		0		0	N/A	N/A
DH	1	Radiographic	Caries- location 3	SMB 66B	30	30 to 40	< 23.5	F	occlusal	whole skull
DH	1	Radiographic	Caries- location 4	SMB 66B	30	30 to 40	< 23.5	F	labial/buccal	whole skull
DH	1	Radiographic	Caries- location 5	SMB 66B	30	30 to 40	< 23.5	F	lingual	whole skull
DH	1	Radiographic	Caries _ CEJ 1	SMB 66B	30	30 to 40	< 23.5	F	labial/buccal	whole skull	N/A	0	N/A		1		0	N/A	1	N/A	1	0	0		N/A		N/A	N/A	1	N/A	0	0	0		0		N/A	N/A	N/A	N/A	0	0	0		0		0	N/A	N/A
DH	1	Radiographic	Caries _ CEJ 2	SMB 66B	30	30 to 40	< 23.5	F	labial/buccal	whole skull	N/A	0	N/A		2		0	N/A	2	N/A	2	0	0		N/A		N/A	N/A	2	N/A	0	0	0		0		N/A	N/A	N/A	N/A	0	0	0		0		0	N/A	N/A
DH	1	Radiographic	Caries _ CEJ 3	SMB 66B	30	30 to 40	< 23.5	F	labial/buccal	whole skull	N/A	0	N/A		2		0	N/A	2	N/A	2	0	0		N/A		N/A	N/A	2	N/A	0	0	0		0		N/A	N/A	N/A	N/A	0	0	0		0		0	N/A	N/A
DH	1	Radiographic	Caries - Radiolucency	SMB 66B	30	30 to 40	< 23.5	F	labial/buccal	whole skull	N/A	0	N/A		1		0	N/A	3	N/A	3	0	0		N/A		N/A	N/A	4	N/A	0	0	0		0		NA	N/A	N/A	N/A	0	0	0		0		0	N/A	N/A
JW	1	Radiographic	Alveolar status	SMB 66B	30	30 to 40	< 23.5	F	labial/buccal	whole skull
JW	1	Radiographic	Periodontal disease	SMB 66B	30	30 to 40	< 23.5	F	labial/buccal	whole skull
JW	1	Radiographic	Periodontal disease	SMB 66B	30	30 to 40	< 23.5	F	lingual	whole skull
JW	1	Radiographic	Enamel hypoplastic defect - present	SMB 66B	30	30 to 40	< 23.5	F	labial/buccal	whole skull
JW	1	Radiographic	Enamel hypoplastic defect - present	SMB 66B	30	30 to 40	< 23.5	F	lingual	whole skull
JW	1	Radiographic	Enamel hypoplastic defect - type -linear	SMB 66B	30	30 to 40	< 23.5	F	labial/buccal	whole skull
JW	1	Radiographic	Enamel hypoplastic defect - type -linear	SMB 66B	30	30 to 40	< 23.5	F	lingual	whole skull
JW	1	Radiographic	Enamel hypoplastic defects-number of lines	SMB 66B	30	30 to 40	< 23.5	F	labial/buccal	whole skull
JW	1	Radiographic	Enamel hypoplastic defects-number of lines	SMB 66B	30	30 to 40	< 23.5	F	lingual	whole skull
JW	1	Radiographic	Enamel hypoplastic defect - type - pits	SMB 66B	30	30 to 40	< 23.5	F	labial/buccal	whole skull
JW	1	Radiographic	Enamel hypoplastic defect - type - pits	SMB 66B	30	30 to 40	< 23.5	F	lingual	whole skull
JW	1	Radiographic	Enamel hypoplastic defects-number of pits	SMB 66B	30	30 to 40	< 23.5	F	labial/buccal	whole skull
JW	1	Radiographic	Enamel hypoplastic defects-number of pits	SMB 66B	30	30 to 40	< 23.5	F	lingual	whole skull
JW	1	Radiographic	Enamel hypoplastic defect - measurement 1 (mm)	SMB 66B	30	30 to 40	< 23.5	F	labial/buccal	whole skull
JW	1	Radiographic	Enamel hypoplastic defect - measurement 1 (mm)	SMB 66B	30	30 to 40	< 23.5	F	lingual	whole skull
JW	1	Radiographic	Enamel hypoplastic defect - measurement 2 (mm)	SMB 66B	30	30 to 40	< 23.5	F	labial/buccal	whole skull
JW	1	Radiographic	Enamel hypoplastic defect - measurement 2 (mm)	SMB 66B	30	30 to 40	< 23.5	F	lingual	whole skull
JW	1	Radiographic	Enamel hypoplastic defect - measurement 3 (mm)	SMB 66B	30	30 to 40	< 23.5	F	labial/buccal	whole skull
JW	1	Radiographic	Enamel hypoplastic defect - measurement 3 (mm)	SMB 66B	30	30 to 40	< 23.5	F	lingual	whole skull
JW	1	Radiographic	Enamel hypoplastic defect - measurement 4 (mm)	SMB 66B	30	30 to 40	< 23.5	F	labial/buccal	whole skull
JW	1	Radiographic	Enamel hypoplastic defect - measurement 4 (mm)	SMB 66B	30	30 to 40	< 23.5	F	lingual	whole skull
JW	1	Radiographic	IGD - present	SMB 66B	30	30 to 40	< 23.5	F	internal	whole skull
MM	1	L.v micro-CT	Inventory	SMB 66B	30	30 to 40	< 23.5	F	labial/buccal	whole skull	2	2	2		4		4	2	3	3	4	2	3		2		2	3	3	2	2	2	2		2		2	N/A	N/A	N/A	2	2	2		2		4	N/A	N/A
MM	1	L.v micro-CT	Tooth Wear	SMB 66B	30	30 to 40	< 23.5	F	occlusal	whole skull	0	2	0		2		1	0	0	1	2	2	2		0		0	1	0	0	3	3	2		1		0	0	0	0	3	3	2		1		1	0	0
MM	1	L.v micro-CT	Dental Trauma	SMB 66B	30	30 to 40	< 23.5	F	labial/buccal	whole skull	3	0	N/A		0		0	N/A	N/A	2	0	0	0		N/A		N/A	N/A	0	N/A	1	0	0		0		N/A	N/A	N/A	N/A	0	0	0		0		0	N/A	N/A
MM	1	L.v micro-CT	Dental Trauma	SMB 66B	30	30 to 40	< 23.5	F	lingual	whole skull	3	0	N/A		0		0	N/A	N/A	0	0	0	0		N/A		N/A	N/A	0	N/A	0	0	0		0		N/A	N/A	N/A	N/A	0	0	0		0		0	N/A	N/A
MM	1	L.v micro-CT	Occlusion	SMB 66B	30	30 to 40	< 23.5	F	occlusal	whole skull
MM	1	L.v micro-CT	Overbite	SMB 66B	30	30 to 40	< 23.5	F	occlusal	whole skull
MM	1	L.v micro-CT	Overjet	SMB 66B	30	30 to 40	< 23.5	F	occlusal	whole skull
MM	1	L.v micro-CT	Caries - present on tooth	SMB 66B	30	30 to 40	< 23.5	F	All	whole skull	1	0	0		N/A		N/A	1	N/A	N/A	N/A	0	N/A		1		0	N/A	N/A	N/A*	0	0	0		0		0	N/A	N/A	N/A	0	0	0		1		N/A	N/A	N/A
MM	1	L.v micro-CT	Caries- location 1	SMB 66B	30	30 to 40	< 23.5	F	mesial	whole skull	1	0	0		N/A		N/A	2	N/A	N/A	N/A	0	0		1		0	N/A	N/A	N/A	0	0	0		0		0	N/A	N/A	N/A	0	0	0		2		N/A	N/A	N/A
MM	1	L.v micro-CT	Caries- location 2	SMB 66B	30	30 to 40	< 23.5	F	distal	whole skull	2	0	0		N/A		N/A	2	N/A	N/A	N/A	0	0		2		0	N/A	N/A	N/A	0	0	0		0		0	N/A	N/A	N/A	2	0	1		2		N/A	N/A	N/A
MM	1	L.v micro-CT	Caries- location 3	SMB 66B	30	30 to 40	< 23.5	F	occlusal	whole skull	N/A	0	N/A		2		0	N/A	N/A	N/A	2	2	2		N/A		N/A	N/A	0	N/A	0	2	0		2		N/A	N/A	N/A	N/A	2	0	2		2		N/A	N/A	N/A
MM	1	L.v micro-CT	Caries- location 4	SMB 66B	30	30 to 40	< 23.5	F	labial/buccal	whole skull	N/A	0	N/A		2		0	N/A	N/A	N/A	2	0	2		N/A		N/A	N/A	0	N/A	0	2	0		1		N/A	N/A	N/A	N/A	2	0	2		2		N/A	N/A	N/A
MM	1	L.v micro-CT	Caries- location 5	SMB 66B	30	30 to 40	< 23.5	F	lingual	whole skull	N/A	0	N/A		2		0	N/A	N/A	N/A	2	2	2		N/A		N/A	N/A	0	N/A	0	2	0		2		N/A	N/A	N/A	N/A	2	0	2		2		N/A	N/A	N/A
MM	1	L.v micro-CT	Caries _ CEJ 1	SMB 66B	30	30 to 40	< 23.5	F	labial/buccal	whole skull	1	0	0		N/A		MN	1	N/A	N/A	N/A	0	0		1		0	N/A	N/A	N/A	0	0	0		0		0	N/A	N/A	N/A	0	0	0		2		N/A	N/A	N/A
MM	1	L.v micro-CT	Caries _ CEJ 2	SMB 66B	30	30 to 40	< 23.5	F	labial/buccal	whole skull	2	0	0		N/A		N/A	2	N/A	N/A	N/A	0	0		2		0	N/A	N/A	N/A	0	0	0		0		0	N/A	N/A	N/A	0	0	1		2		N/A	N/A	N/A
MM	1	L.v micro-CT	Caries _ CEJ 3	SMB 66B	30	30 to 40	< 23.5	F	labial/buccal	whole skull	2	0	0		N/A		N/A	2	N/A	N/A	N/A	0	2		2		0	N/A	N/A	N/A	0	0	0		0		0	N/A	N/A	N/A	0	0	0		1		N/A	N/A	N/A
MM	1	L.v micro-CT	Caries - Radiolucency	SMB 66B	30	30 to 40	< 23.5	F	labial/buccal	whole skull	1	0	0		N/A		N/A	1	N/A	N/A	N/A	0	0		1		0	N/A	N/A	N/A	0	0	0		0		0	N/A	N/A	N/A	0	0	0		3		N/A	N/A	N/A
MM	1	L.v micro-CT	Alveolar status	SMB 66B	30	30 to 40	< 23.5	F	labial/buccal	whole skull					3		3	0	0	0					0		0	0	0	0					4		0	0	0	0					4		4	0	0
MM	1	L.v micro-CT	Periodontal disease	SMB 66B	30	30 to 40	< 23.5	F	labial/buccal	whole skull	N/A	3.71	N/A		4.47		4.04	N/A	N/A	N/A	2.71	4.04	3.55		N/A		N/A	N/A	4.61	N/A	3.58	4.21	3.63		5.1		N/A	N/A	N/A	N/A	3.9	4.74	4.19		5.64		4.8	N/A	N/A
MM	1	L.v micro-CT	Periodontal disease	SMB 66B	30	30 to 40	< 23.5	F	lingual	whole skull	N/A	1.96	N/A		3.62		4.65	N/A	N/A	N/A	2.04	1.5	3.09		N/A		N/A	N/A	4.65	N/A	4.76	4.48	4.1		3.95		N/A	N/A	N/A	N/A	4.66	4.33	4.09		4.39		3.47	N/A	N/A
MM	1	L.v micro-CT	Enamel hypoplastic defect - present	SMB 66B	30	30 to 40	< 23.5	F	labial/buccal	whole skull	N/A	0	N/A		0		0	N/A	N/A	N/A	0	0	1		N/A		N/A	N/A	0	N/A	0	0	0		0		N/A	N/A	N/A	N/A	0	0	0		0		0	N/A	N/A
MM	1	L.v micro-CT	Enamel hypoplastic defect - present	SMB 66B	30	30 to 40	< 23.5	F	lingual	whole skull	N/A	0	N/A		0		0	N/A	N/A	N/A	0	0	0		N/A		N/A	N/A	0	N/A	0	0	0		0		N/A	N/A	N/A	N/A	0	0	0		0		0	N/A	N/A
MM	1	L.v micro-CT	Enamel hypoplastic defect - type -linear	SMB 66B	30	30 to 40	< 23.5	F	labial/buccal	whole skull	N/A	0	N/A		0		0	N/A	N/A	N/A	0	0	2		N/A		N/A	N/A	0	N/A	0	0	0		0		N/A	N/A	N/A	N/A	0	0	0		0		0	N/A	N/A
MM	1	L.v micro-CT	Enamel hypoplastic defect - type -linear	SMB 66B	30	30 to 40	< 23.5	F	lingual	whole skull	N/A	0	N/A		0		0	N/A	N/A	N/A	0	0	0		N/A		N/A	N/A	0	N/A	0	0	0		0		N/A	N/A	N/A	N/A	0	0	0		0		0	N/A	N/A
MM	1	L.v micro-CT	Enamel hypoplastic defects-number of lines	SMB 66B	30	30 to 40	< 23.5	F	labial/buccal	whole skull	N/A	0	N/A		0		0	N/A	N/A	N/A	0	0	0		N/A		N/A	N/A	0	N/A	0	0	0		0		N/A	N/A	N/A	N/A	0	0	0		0		0	N/A	N/A
MM	1	L.v micro-CT	Enamel hypoplastic defects-number of lines	SMB 66B	30	30 to 40	< 23.5	F	lingual	whole skull	N/A	0	N/A		0		0	N/A	N/A	N/A	0	0	0		N/A		N/A	N/A	0	N/A	0	0	0		0		N/A	N/A	N/A	N/A	0	0	0		0		0	N/A	N/A
MM	1	L.v micro-CT	Enamel hypoplastic defect - type - pits	SMB 66B	30	30 to 40	< 23.5	F	labial/buccal	whole skull	N/A	0	N/A		0		0	N/A	N/A	N/A	0	0	2		N/A		N/A	N/A	0	N/A	0	0	0		0		N/A	N/A	N/A	N/A	0	0	0		0		0	N/A	N/A
MM	1	L.v micro-CT	Enamel hypoplastic defect - type - pits	SMB 66B	30	30 to 40	< 23.5	F	lingual	whole skull	N/A	0	N/A		0		0	N/A	N/A	N/A	0	0	0		N/A		N/A	N/A	0	N/A	0	0	0		0		N/A	N/A	N/A	N/A	0	0	0		0		0	N/A	N/A
MM	1	L.v micro-CT	Enamel hypoplastic defects-number of pits	SMB 66B	30	30 to 40	< 23.5	F	labial/buccal	whole skull	N/A	0	N/A		0		0	N/A	N/A	N/A	0	0	2		N/A		N/A	N/A	0	N/A	0	0	0		0		N/A	N/A	N/A	N/A	0	0	0		0		0	N/A	N/A
MM	1	L.v micro-CT	Enamel hypoplastic defects-number of pits	SMB 66B	30	30 to 40	< 23.5	F	lingual	whole skull	N/A	0	N/A		0		0	N/A	N/A	N/A	0	0	0		N/A		N/A	N/A	0	N/A	0	0	0		0		N/A	N/A	N/A	N/A	0	0	0		0		0	N/A	N/A
MM	1	L.v micro-CT	Enamel hypoplastic defect - measurement 1 (mm)	SMB 66B	30	30 to 40	< 23.5	F	labial/buccal	whole skull	N/A	0	N/A		0		0	N/A	N/A	N/A	0	0	2.1		N/A		N/A	N/A	0	N/A	0	0	0		0		N/A	N/A	N/A	N/A	0	0	0		0		0	N/A	N/A
MM	1	L.v micro-CT	Enamel hypoplastic defect - measurement 1 (mm)	SMB 66B	30	30 to 40	< 23.5	F	lingual	whole skull	N/A	0	N/A		0		0	N/A	N/A	N/A	0	0	0		N/A		N/A	N/A	0	N/A	0	0	0		0		N/A	N/A	N/A	N/A	0	0	0		0		0	N/A	N/A
MM	1	L.v micro-CT	Enamel hypoplastic defect - measurement 2 (mm)	SMB 66B	30	30 to 40	< 23.5	F	labial/buccal	whole skull	N/A	0	N/A		0		0	N/A	N/A	N/A	0	0	0		N/A		N/A	N/A	0	N/A	0	0	0		0		N/A	N/A	N/A	N/A	0	0	0		0		0	N/A	N/A
MM	1	L.v micro-CT	Enamel hypoplastic defect - measurement 2 (mm)	SMB 66B	30	30 to 40	< 23.5	F	lingual	whole skull	N/A	0	N/A		0		0	N/A	N/A	N/A	0	0	0		N/A		N/A	N/A	0	N/A	0	0	0		0		N/A	N/A	N/A	N/A	0	0	0		0		0	N/A	N/A
MM	1	L.v micro-CT	Enamel hypoplastic defect - measurement 3 (mm)	SMB 66B	30	30 to 40	< 23.5	F	labial/buccal	whole skull	N/A	0	N/A		0		0	N/A	N/A	N/A	0	0	0		N/A		N/A	N/A	0	N/A	0	0	0		0		N/A	N/A	N/A	N/A	0	0	0		0		0	N/A	N/A
MM	1	L.v micro-CT	Enamel hypoplastic defect - measurement 3 (mm)	SMB 66B	30	30 to 40	< 23.5	F	lingual	whole skull	N/A	0	N/A		0		0	N/A	N/A	N/A	0	0	0		N/A		N/A	N/A	0	N/A	0	0	0		0		N/A	N/A	N/A	N/A	0	0	0		0		0	N/A	N/A
MM	1	L.v micro-CT	Enamel hypoplastic defect - measurement 4 (mm)	SMB 66B	30	30 to 40	< 23.5	F	labial/buccal	whole skull	N/A	0	N/A		0		0	N/A	N/A	N/A	0	0	0		N/A		N/A	N/A	0	N/A	0	0	0		0		N/A	N/A	N/A	N/A	0	0	0		0		0	N/A	N/A
MM	1	L.v micro-CT	Enamel hypoplastic defect - measurement 4 (mm)	SMB 66B	30	30 to 40	< 23.5	F	lingual	whole skull	N/A	0	N/A		0		0	N/A	N/A	N/A	0	0	0		N/A		N/A	N/A	0	N/A	0	0	0		0		N/A	N/A	N/A	N/A	0	0	0		0		0	N/A	N/A
MM	1	L.v micro-CT	IGD - present	SMB 66B	30	30 to 40	< 23.5	F	internal	whole skull	N/A	0	N/A		0		0	N/A	0	N/A	0	0	0		N/A		N/A	N/A	0	N/A	0	0	0		0		N/A	N/A	N/A	N/A	0	0	0		0		0	N/A	N/A
MM	1	S.v micro-CT	Inventory	SMB 66B	30	30 to 40		F	labial/buccal	Individual tooth samples
MM	1	S.v micro-CT	Tooth Wear	SMB 66B	30	30 to 40		F	occlusal	Individual tooth samples		3			3		0		0
MM	1	S.v micro-CT	Dental Trauma	SMB 66B	30	30 to 40		F	labial/buccal	Individual tooth samples		0			0		0		0
MM	1	S.v micro-CT	Dental Trauma	SMB 66B	30	30 to 40		F	lingual	Individual tooth samples		0			0		0		3
MM	1	S.v micro-CT	Occlusion	SMB 66B	30	30 to 40		F	occlusal	Individual tooth samples
MM	1	S.v micro-CT	Overbite	SMB 66B	30	30 to 40		F	occlusal	Individual tooth samples
MM	1	S.v micro-CT	Overjet	SMB 66B	30	30 to 40		F	occlusal	Individual tooth samples
MM	1	S.v micro-CT	Caries - present on tooth	SMB 66B	30	30 to 40		F	All	Individual tooth samples		0			3		0		0
MM	1	S.v micro-CT	Caries- location 1	SMB 66B	30	30 to 40		F	mesial	Individual tooth samples		0			1		0		0
MM	1	S.v micro-CT	Caries- location 2	SMB 66B	30	30 to 40		F	distal	Individual tooth samples		0			2		0		0
MM	1	S.v micro-CT	Caries- location 3	SMB 66B	30	30 to 40		F	occlusal	Individual tooth samples		0			2		0		0
MM	1	S.v micro-CT	Caries- location 4	SMB 66B	30	30 to 40		F	labial/buccal	Individual tooth samples		0			2		0		0
MM	1	S.v micro-CT	Caries- location 5	SMB 66B	30	30 to 40		F	lingual	Individual tooth samples		0			2		0		0
MM	1	S.v micro-CT	Caries _ CEJ 1	SMB 66B	30	30 to 40		F	labial/buccal	Individual tooth samples		0			N/A		N/A	1
MM	1	S.v micro-CT	Caries _ CEJ 2	SMB 66B	30	30 to 40		F	labial/buccal	Individual tooth samples		0			N/A		N/A	2
MM	1	S.v micro-CT	Caries _ CEJ 3	SMB 66B	30	30 to 40		F	labial/buccal	Individual tooth samples		0			N/A		N/A	2
MM	1	S.v micro-CT	Caries - Radiolucency	SMB 66B	30	30 to 40		F	labial/buccal	Individual tooth samples		0			N/A		N/A	1
MM	1	S.v micro-CT	Alveolar status	SMB 66B	30	30 to 40		F	labial/buccal	Individual tooth samples
MM	1	S.v micro-CT	Periodontal disease	SMB 66B	30	30 to 40		F	labial/buccal	Individual tooth samples
MM	1	S.v micro-CT	Periodontal disease	SMB 66B	30	30 to 40		F	labial/buccal	Individual tooth samples
MM	1	S.v micro-CT	Enamel hypoplastic defect - present	SMB 66B	30	30 to 40		F	labial/buccal	Individual tooth samples		0			1		1		N/A
MM	1	S.v micro-CT	Enamel hypoplastic defect - present	SMB 66B	30	30 to 40		F	lingual	Individual tooth samples		1			0		0		1
MM	1	S.v micro-CT	Enamel hypoplastic defect - type -linear	SMB 66B	30	30 to 40		F	labial/buccal	Individual tooth samples		0			2		2		N/A
MM	1	S.v micro-CT	Enamel hypoplastic defect - type -linear	SMB 66B	30	30 to 40		F	lingual	Individual tooth samples		2			0		0		2
MM	1	S.v micro-CT	Enamel hypoplastic defects-number of lines	SMB 66B	30	30 to 40		F	labial/buccal	Individual tooth samples		0			0		0		N/A
MM	1	S.v micro-CT	Enamel hypoplastic defects-number of lines	SMB 66B	30	30 to 40		F	lingual	Individual tooth samples		0			0		0		0
MM	1	S.v micro-CT	Enamel hypoplastic defect - type - pits	SMB 66B	30	30 to 40		F	labial/buccal	Individual tooth samples		0			1		1		N/A
MM	1	S.v micro-CT	Enamel hypoplastic defect - type - pits	SMB 66B	30	30 to 40		F	lingual	Individual tooth samples		1			0		0		1
MM	1	S.v micro-CT	Enamel hypoplastic defects-number of pits	SMB 66B	30	30 to 40		F	labial/buccal	Individual tooth samples		0			1		2		N/A
MM	1	S.v micro-CT	Enamel hypoplastic defects-number of pits	SMB 66B	30	30 to 40		F	lingual	Individual tooth samples		1			0		0		2
MM	1	S.v micro-CT	Enamel hypoplastic defect - measurement 1 (mm)	SMB 66B	30	30 to 40		F	labial/buccal	Individual tooth samples		0			2.05		1.85		N/A
MM	1	S.v micro-CT	Enamel hypoplastic defect - measurement 1 (mm)	SMB 66B	30	30 to 40		F	lingual	Individual tooth samples		2.78			0		0		2.01
MM	1	S.v micro-CT	Enamel hypoplastic defect - measurement 2 (mm)	SMB 66B	30	30 to 40		F	labial/buccal	Individual tooth samples		0			0		3.27		N/A
MM	1	S.v micro-CT	Enamel hypoplastic defect - measurement 2 (mm)	SMB 66B	30	30 to 40		F	lingual	Individual tooth samples		0			0		0		3.8
MM	1	S.v micro-CT	Enamel hypoplastic defect - measurement 3 (mm)	SMB 66B	30	30 to 40		F	labial/buccal	Individual tooth samples		0			0		4.76		N/A
MM	1	S.v micro-CT	Enamel hypoplastic defect - measurement 3 (mm)	SMB 66B	30	30 to 40		F	lingual	Individual tooth samples		0			0		0		0
MM	1	S.v micro-CT	Enamel hypoplastic defect - measurement 4 (mm)	SMB 66B	30	30 to 40		F	labial/buccal	Individual tooth samples		0			0		0		N/A
MM	1	S.v micro-CT	Enamel hypoplastic defect - measurement 4 (mm)	SMB 66B	30	30 to 40		F	lingual	Individual tooth samples		0			0		0		0
MM	1	S.v micro-CT	IGD - present	SMB 66B	30	30 to 40		F	internal	Individual tooth samples		0			0		0		0
AG	1	Macro	Inventory	SMB 52B	10	8 to 12	10.5 to 11.5	U	labial/buccal	whole skull	2	2	2		2		2	2	1	4	2	4	2		2		2	2	1	4	2	2	2		1	2		2	1	4	2	2	2		1	2		2	1
AG	1	Macro	Tooth Wear	SMB 52B	10	8 to 12	10.5 to 11.5	U	occlusal	whole skull	2	2	1		1		1	2	1	N/A	2	N/A	1		1		1	2	1	N/A	2	2	2		N/A	3		2	2	N/A	3	2	2		1	3		2	1
AG	1	Macro	Dental Trauma	SMB 52B	10	8 to 12	10.5 to 11.5	U	labial/buccal	whole skull	2	0	0		0		0	0	0	N/A	2	N/A	0		0		0	0	0	N/A	0	0	1		N/A	0		0	0	N/A	1	0	0		0	0		0	0
AG	1	Macro	Dental Trauma	SMB 52B	10	8 to 12	10.5 to 11.5	U	lingual	whole skull	2	0	0		0		0	0	0	N/A	2	N/A	0		0		0	0	0	N/A	0	0	1		N/A	0		0	0	N/A	0	0	0		0	0		3	0
AG	1	Macro	Occlusion	SMB 52B	10	8 to 12	10.5 to 11.5	U	occlusal	whole skull
AG	1	Macro	Overbite	SMB 52B	10	8 to 12	10.5 to 11.5	U	labial/buccal	whole skull	2	1	N/A								2	N/A	N/A
AG	1	Macro	Overjet	SMB 52B	10	8 to 12	10.5 to 11.5	U	labial/buccal	whole skull	1.5	1	N/A								2	N/A	N/A
AG	1	Macro	Caries - present on tooth	SMB 52B	10	8 to 12	10.5 to 11.5	U	All	whole skull	0	0	0		0		0	0	0	N/A	0	N/A	0		0		0	0	0	N/A	0	0	0		N/A	0		0	0	N/A	0	0	0		0	0		0	0
AG	1	Macro	Caries- location 1	SMB 52B	10	8 to 12	10.5 to 11.5	U	mesial	whole skull	0	0	0		0		0	0	0	N/A	0	N/A	0		0		0	0	0	N/A	0	0	0		N/A	0		0	0	N/A	0	0	0		0	0		0	0
AG	1	Macro	Caries- location 2	SMB 52B	10	8 to 12	10.5 to 11.5	U	distal	whole skull	0	0	0		0		0	0	0	N/A	0	N/A	0		0		0	0	0	N/A	0	0	0		N/A	0		0	0	N/A	0	0	0		0	0		0	0
AG	1	Macro	Caries- location 3	SMB 52B	10	8 to 12	10.5 to 11.5	U	occlusal	whole skull	0	0	0		0		0	0	0	N/A	0	N/A	0		0		0	0	0	N/A	0	0	0		N/A	0		0	0	N/A	0	0	0		0	0		0	0
AG	1	Macro	Caries- location 4	SMB 52B	10	8 to 12	10.5 to 11.5	U	labial/buccal	whole skull	0	0	0		0		0	0	0	N/A	0	N/A	0		0		0	0	0	N/A	0	0	0		N/A	0		0	0	N/A	0	0	0		0	0		0	0
AG	1	Macro	Caries- location 5	SMB 52B	10	8 to 12	10.5 to 11.5	U	lingual	whole skull	0	0	0		0		0	0	0	N/A	0	N/A	0		0		0	0	0	N/A	0	0	0		N/A	0		0	0	N/A	0	0	0		0	0		0	0
AG	1	Macro	Caries _ CEJ 1	SMB 52B	10	8 to 12	10.5 to 11.5	U	labial/buccal	whole skull	0	0	0		0		0	0	0	N/A	0	N/A	0		0		0	0	0	N/A	0	0	0		N/A	0		0	0	N/A	0	0	0		0	0		0	0
AG	1	Macro	Caries _ CEJ 2	SMB 52B	10	8 to 12	10.5 to 11.5	U	labial/buccal	whole skull	0	0	0		0		0	0	0	N/A	0	N/A	0		0		0	0	0	N/A	0	0	0		N/A	0		0	0	N/A	0	0	0		0	0		0	0
AG	1	Macro	Caries _ CEJ 3	SMB 52B	10	8 to 12	10.5 to 11.5	U	labial/buccal	whole skull	0	0	0		0		0	0	0	N/A	0	N/A	0		0		0	0	0	N/A	0	0	0		N/A	0		0	0	N/A	0	0	0		0	0		0	0
AG	1	Macro	Caries - Radiolucency	SMB 52B	10	8 to 12	10.5 to 11.5	U	labial/buccal	whole skull
AG	1	Macro	Alveolar status	SMB 52B	10	8 to 12	10.5 to 11.5	U	labial/buccal	whole skull					0		0	0	0	0					0		0	0	0	0					1	1		1	1	0					1	1		1	1
AG	1	Macro	Periodontal disease	SMB 52B	10	8 to 12	10.5 to 11.5	U	labial/buccal	whole skull	2.5	1	0		0		0	2	0	N/A	1	N/A	4		0		0	1	0	N/A	1	1	0		N/A	1		0	0	N/A	1	1	1		0	1		0	0
AG	1	Macro	Periodontal disease	SMB 52B	10	8 to 12	10.5 to 11.5	U	lingual	whole skull	1	0	0		0		0	1	0	N/A	1	N/A	0		0		0	0	0	N/A	0.5	0.5	0		N/A	1		0	0	N/A	1	1	0		0	1		0	0
AG	1	Macro	Enamel hypoplastic defect - present	SMB 52B	10	8 to 12	10.5 to 11.5	U	labial/buccal	whole skull	0	0	0		0		0	0	0	N/A	0	N/A	0		0		0	0	0	N/A	0	0	0		N/A	0		0	0	N/A	0	0	0		0	0		0	0
AG	1	Macro	Enamel hypoplastic defect - present	SMB 52B	10	8 to 12	10.5 to 11.5	U	lingual	whole skull	0	0	0		0		0	0	0	N/A	0	N/A	0		0		0	0	0	N/A	0	0	0		N/A	0		0	0	N/A	0	0	0		0	0		0	0
AG	1	Macro	Enamel hypoplastic defect - type -linear	SMB 52B	10	8 to 12	10.5 to 11.5	U	labial/buccal	whole skull	0	0	0		0		0	0	0	N/A	0	N/A	0		0		0	0	0	N/A	0	0	0		N/A	0		0	0	N/A	0	0	0		0	0		0	0
AG	1	Macro	Enamel hypoplastic defect - type -linear	SMB 52B	10	8 to 12	10.5 to 11.5	U	lingual	whole skull	0	0	0		0		0	0	0	N/A	0	N/A	0		0		0	0	0	N/A	0	0	0		N/A	0		0	0	N/A	0	0	0		0	0		0	0
AG	1	Macro	Enamel hypoplastic defects-number of lines	SMB 52B	10	8 to 12	10.5 to 11.5	U	labial/buccal	whole skull	0	0	0		0		0	0	0	N/A	0	N/A	0		0		0	0	0	N/A	0	0	0		N/A	0		0	0	N/A	0	0	0		0	0		0	0
AG	1	Macro	Enamel hypoplastic defects-number of lines	SMB 52B	10	8 to 12	10.5 to 11.5	U	lingual	whole skull	0	0	0		0		0	0	0	N/A	0	N/A	0		0		0	0	0	N/A	0	0	0		N/A	0		0	0	N/A	0	0	0		0	0		0	0
AG	1	Macro	Enamel hypoplastic defect - type - pits	SMB 52B	10	8 to 12	10.5 to 11.5	U	labial/buccal	whole skull	0	0	0		0		0	0	0	N/A	0	N/A	0		0		0	0	0	N/A	0	0	0		N/A	0		0	0	N/A	0	0	0		0	0		0	0
AG	1	Macro	Enamel hypoplastic defect - type - pits	SMB 52B	10	8 to 12	10.5 to 11.5	U	lingual	whole skull	0	0	0		0		0	0	0	N/A	0	N/A	0		0		0	0	0	N/A	0	0	0		N/A	0		0	0	N/A	0	0	0		0	0		0	0
AG	1	Macro	Enamel hypoplastic defects-number of pits	SMB 52B	10	8 to 12	10.5 to 11.5	U	labial/buccal	whole skull	0	0	0		0		0	0	0	N/A	0	N/A	0		0		0	0	0	N/A	0	0	0		N/A	0		0	0	N/A	0	0	0		0	0		0	0
AG	1	Macro	Enamel hypoplastic defects-number of pits	SMB 52B	10	8 to 12	10.5 to 11.5	U	lingual	whole skull	0	0	0		0		0	0	0	N/A	0	N/A	0		0		0	0	0	N/A	0	0	0		N/A	0		0	0	N/A	0	0	0		0	0		0	0
AG	1	Macro	Enamel hypoplastic defect - measurement 1 (mm)	SMB 52B	10	8 to 12	10.5 to 11.5	U	labial/buccal	whole skull	0	0	0		0		0	0	0	N/A	0	N/A	0		0		0	0	0	N/A	0	0	0		N/A	0		0	0	N/A	0	0	0		0	0		0	0
AG	1	Macro	Enamel hypoplastic defect - measurement 1 (mm)	SMB 52B	10	8 to 12	10.5 to 11.5	U	lingual	whole skull	0	0	0		0		0	0	0	N/A	0	N/A	0		0		0	0	0	N/A	0	0	0		N/A	0		0	0	N/A	0	0	0		0	0		0	0
AG	1	Macro	Enamel hypoplastic defect - measurement 2 (mm)	SMB 52B	10	8 to 12	10.5 to 11.5	U	labial/buccal	whole skull	0	0	0		0		0	0	0	N/A	0	N/A	0		0		0	0	0	N/A	0	0	0		N/A	0		0	0	N/A	0	0	0		0	0		0	0
AG	1	Macro	Enamel hypoplastic defect - measurement 2 (mm)	SMB 52B	10	8 to 12	10.5 to 11.5	U	lingual	whole skull	0	0	0		0		0	0	0	N/A	0	N/A	0		0		0	0	0	N/A	0	0	0		N/A	0		0	0	N/A	0	0	0		0	0		0	0
AG	1	Macro	Enamel hypoplastic defect - measurement 3 (mm)	SMB 52B	10	8 to 12	10.5 to 11.5	U	labial/buccal	whole skull	0	0	0		0		0	0	0	N/A	0	N/A	0		0		0	0	0	N/A	0	0	0		N/A	0		0	0	N/A	0	0	0		0	0		0	0
AG	1	Macro	Enamel hypoplastic defect - measurement 3 (mm)	SMB 52B	10	8 to 12	10.5 to 11.5	U	lingual	whole skull	0	0	0		0		0	0	0	N/A	0	N/A	0		0		0	0	0	N/A	0	0	0		N/A	0		0	0	N/A	0	0	0		0	0		0	0
AG	1	Macro	Enamel hypoplastic defect - measurement 4 (mm)	SMB 52B	10	8 to 12	10.5 to 11.5	U	labial/buccal	whole skull	0	0	0		0		0	0	0	N/A	0	N/A	0		0		0	0	0	N/A	0	0	0		N/A	0		0	0	N/A	0	0	0		0	0		0	0
AG	1	Macro	Enamel hypoplastic defect - measurement 4 (mm)	SMB 52B	10	8 to 12	10.5 to 11.5	U	lingual	whole skull	0	0	0		0		0	0	0	N/A	0	N/A	0		0		0	0	0	N/A	0	0	0		N/A	0		0	0	N/A	0	0	0		0	0		0	0
AG	1	Macro	IGD - present	SMB 52B	10	8 to 12	10.5 to 11.5	U	internal	whole skull
AG	1	Radiographic	Inventory	SMB 52B	10	8 to 12	10.5 to 11.5	U	labial/buccal	whole skull	2	2	2		2		2	2	1	1	2	4	2		2		2	2	1	1	2	2	2		1	2		2	2	4	2	2	2		1	2		2	2
AG	1	Radiographic	Tooth Wear	SMB 52B	10	8 to 12	10.5 to 11.5	U	occlusal	whole skull	2	2	2		2		2	2	N/A	N/A	2	N/A	2		2		2	2	N/A	N/A	2	2	2		N/A	2		2	2	N/A	2	2	2		2	2		2	2
AG	1	Radiographic	Dental Trauma	SMB 52B	10	8 to 12	10.5 to 11.5	U	labial/buccal	whole skull	3	0	0		0		0	0	0	0	2	N/A	3		0		0	0	0	N/A	3	0	0		N/A	0		0	0	N/A	0	3	0		0	0		0	0
AG	1	Radiographic	Dental Trauma	SMB 52B	10	8 to 12	10.5 to 11.5	U	lingual	whole skull
AG	1	Radiographic	Occlusion	SMB 52B	10	8 to 12	10.5 to 11.5	U	Occlusal	whole skull
AG	1	Radiographic	Overbite	SMB 52B	10	8 to 12	10.5 to 11.5	U	occlusal	whole skull
AG	1	Radiographic	Overjet	SMB 52B	10	8 to 12	10.5 to 11.5	U	occlusal	whole skull												N/A
AG	1	Radiographic	Caries - present on tooth	SMB 52B	10	8 to 12	10.5 to 11.5	U	All	whole skull	0	0	0		0		0	0	0	N/A	0	N/A	0		0		0	0	0	N/A	0	0	0		N/A	0		0	0	N/A	0	0	0		0	0		0	0
AG	1	Radiographic	Caries- location 1	SMB 52B	10	8 to 12	10.5 to 11.5	U	mesial	whole skull	0	0	0		0		0	0	0	N/A	0	N/A	0		0		0	0	0	N/A	0	0	0		N/A	0		0	0	N/A	0	0	0		0	0		0	0
AG	1	Radiographic	Caries- location 2	SMB 52B	10	8 to 12	10.5 to 11.5	U	distal	whole skull	0	0	0		0		0	0	0	N/A	0	N/A	0		0		0	0	0	N/A	0	0	0		N/A	0		0	0	N/A	0	0	0		0	0		0	0
AG	1	Radiographic	Caries- location 3	SMB 52B	10	8 to 12	10.5 to 11.5	U	occlusal	whole skull	0	0	0		0		0	0	0	N/A	0	N/A	0		0		0	0	0	N/A	0	0	0		N/A	0		0	0	N/A	0	0	0		0	0		0	0
AG	1	Radiographic	Caries- location 4	SMB 52B	10	8 to 12	10.5 to 11.5	U	labial/buccal	whole skull	0	0	0		0		0	0	0	N/A	0	N/A	0		0		0	0	0	N/A	0	0	0		N/A	0		0	0	N/A	0	0	0		0	0		0	0
AG	1	Radiographic	Caries- location 5	SMB 52B	10	8 to 12	10.5 to 11.5	U	lingual	whole skull	0	0	0		0		0	0	0	N/A	0	N/A	0		0		0	0	0	N/A	0	0	0		N/A	0		0	0	N/A	0	0	0		0	0		0	0
AG	1	Radiographic	Caries _ CEJ 1	SMB 52B	10	8 to 12	10.5 to 11.5	U	labial/buccal	whole skull	0	0	0		0		0	0	0	N/A	0	N/A	0		0		0	0	0	N/A	0	0	0		N/A	0		0	0	N/A	0	0	0		0	0		0	0
AG	1	Radiographic	Caries _ CEJ 2	SMB 52B	10	8 to 12	10.5 to 11.5	U	labial/buccal	whole skull	0	0	0		0		0	0	0	N/A	0	N/A	0		0		0	0	0	N/A	0	0	0		N/A	0		0	0	N/A	0	0	0		0	0		0	0
AG	1	Radiographic	Caries _ CEJ 3	SMB 52B	10	8 to 12	10.5 to 11.5	U	labial/buccal	whole skull	0	0	0		0		0	0	0	N/A	0	N/A	0		0		0	0	0	N/A	0	0	0		N/A	0		0	0	N/A	0	0	0		0	0		0	0
AG	1	Radiographic	Caries - Radiolucency	SMB 52B	10	8 to 12	10.5 to 11.5	U	labial/buccal	whole skull	0	0	0		0		0	0	0	N/A	0	N/A	0		0		0	0	0	N/A	0	0	0		N/A	0		0	0	N/A	0	0	0		0	0		0	0
AG	1	Radiographic	Alveolar status	SMB 52B	10	8 to 12	10.5 to 11.5	U	labial/buccal	whole skull
AG	1	Radiographic	Periodontal disease	SMB 52B	10	8 to 12	10.5 to 11.5	U	labial/buccal	whole skull
AG	1	Radiographic	Periodontal disease	SMB 52B	10	8 to 12	10.5 to 11.5	U	lingual	whole skull
AG	1	Radiographic	Enamel hypoplastic defect - present	SMB 52B	10	8 to 12	10.5 to 11.5	U	labial/buccal	whole skull
AG	1	Radiographic	Enamel hypoplastic defect - present	SMB 52B	10	8 to 12	10.5 to 11.5	U	lingual	whole skull
AG	1	Radiographic	Enamel hypoplastic defect - type -linear	SMB 52B	10	8 to 12	10.5 to 11.5	U	labial/buccal	whole skull
AG	1	Radiographic	Enamel hypoplastic defect - type -linear	SMB 52B	10	8 to 12	10.5 to 11.5	U	lingual	whole skull
AG	1	Radiographic	Enamel hypoplastic defects-number of lines	SMB 52B	10	8 to 12	10.5 to 11.5	U	labial/buccal	whole skull
AG	1	Radiographic	Enamel hypoplastic defects-number of lines	SMB 52B	10	8 to 12	10.5 to 11.5	U	lingual	whole skull
AG	1	Radiographic	Enamel hypoplastic defect - type - pits	SMB 52B	10	8 to 12	10.5 to 11.5	U	labial/buccal	whole skull
AG	1	Radiographic	Enamel hypoplastic defect - type - pits	SMB 52B	10	8 to 12	10.5 to 11.5	U	lingual	whole skull
AG	1	Radiographic	Enamel hypoplastic defects-number of pits	SMB 52B	10	8 to 12	10.5 to 11.5	U	labial/buccal	whole skull
AG	1	Radiographic	Enamel hypoplastic defects-number of pits	SMB 52B	10	8 to 12	10.5 to 11.5	U	lingual	whole skull
AG	1	Radiographic	Enamel hypoplastic defect - measurement 1 (mm)	SMB 52B	10	8 to 12	10.5 to 11.5	U	labial/buccal	whole skull
AG	1	Radiographic	Enamel hypoplastic defect - measurement 1 (mm)	SMB 52B	10	8 to 12	10.5 to 11.5	U	lingual	whole skull
AG	1	Radiographic	Enamel hypoplastic defect - measurement 2 (mm)	SMB 52B	10	8 to 12	10.5 to 11.5	U	labial/buccal	whole skull
AG	1	Radiographic	Enamel hypoplastic defect - measurement 2 (mm)	SMB 52B	10	8 to 12	10.5 to 11.5	U	lingual	whole skull
AG	1	Radiographic	Enamel hypoplastic defect - measurement 3 (mm)	SMB 52B	10	8 to 12	10.5 to 11.5	U	labial/buccal	whole skull
AG	1	Radiographic	Enamel hypoplastic defect - measurement 3 (mm)	SMB 52B	10	8 to 12	10.5 to 11.5	U	lingual	whole skull
AG	1	Radiographic	Enamel hypoplastic defect - measurement 4 (mm)	SMB 52B	10	8 to 12	10.5 to 11.5	U	labial/buccal	whole skull
AG	1	Radiographic	Enamel hypoplastic defect - measurement 4 (mm)	SMB 52B	10	8 to 12	10.5 to 11.5	U	lingual	whole skull
AG	1	Radiographic	IGD - present	SMB 52B	10	8 to 12	10.5 to 11.5	U	internal	whole skull
AG	1	L.v micro-CT	Inventory	SMB 52B	10	8 to 12	10.5 to 11.5	U	labial/buccal	whole skull	2	2	2		2		2	2	1	N/A	2	4	2		2		2	2	1	N/A	2	2	2		1	2		2	2	N/A	2	2	2		1	2		2	1
AG	1	L.v micro-CT	Tooth Wear	SMB 52B	10	8 to 12	10.5 to 11.5	U	occlusal	whole skull	2	2	2		2		2	2	1	N/A	2	0	2		2		2	2	1	N/A	3	2	2		N/A	3		2	2	N/A	3	2	2		1	4		3	1
AG	1	L.v micro-CT	Dental Trauma	SMB 52B	10	8 to 12	10.5 to 11.5	U	labial/buccal	whole skull	0	0	0		0		0	0	0	N/A	0	0	0		0		0	0	0	N/A	0	0	0		N/A	0		0	0	N/A	0	0	0		0	0		0	0
AG	1	L.v micro-CT	Dental Trauma	SMB 52B	10	8 to 12	10.5 to 11.5	U	lingual	whole skull	0	0	0		0		0	0	0	N/A	0	0	0		0		0	0	0	N/A	0	0	0		N/A	0		0	0	N/A	0	0	0		0	0		0	0
AG	1	L.v micro-CT	Occlusion	SMB 52B	10	8 to 12	10.5 to 11.5	U	occlusal	whole skull
AG	1	L.v micro-CT	Overbite	SMB 52B	10	8 to 12	10.5 to 11.5	U	occlusal	whole skull	2	1									2	N/A	N/A
AG	1	L.v micro-CT	Overjet	SMB 52B	10	8 to 12	10.5 to 11.5	U	occlusal	whole skull	3	2.93	N/A								3.01	N/A	N/A
AG	1	L.v micro-CT	Caries - present on tooth	SMB 52B	10	8 to 12	10.5 to 11.5	U	All	whole skull	0	0	0		0		0	0	0	N/A	0	N/A	0		0		0	0	0	N/A	0	0	0		N/A	0		0	0	N/A	0	0	0		0	0		0	0
AG	1	L.v micro-CT	Caries- location 1	SMB 52B	10	8 to 12	10.5 to 11.5	U	mesial	whole skull	0	0	0		0		0	0	0	N/A	0	N/A	0		0		0	0	0	N/A	0	0	0		N/A	0		0	0	N/A	0	0	0		0	0		0	0
AG	1	L.v micro-CT	Caries- location 2	SMB 52B	10	8 to 12	10.5 to 11.5	U	distal	whole skull	0	0	0		0		0	0	0	N/A	0	N/A	0		0		0	0	0	N/A	0	0	0		N/A	0		0	0	N/A	0	0	0		0	0		0	0
AG	1	L.v micro-CT	Caries- location 3	SMB 52B	10	8 to 12	10.5 to 11.5	U	occlusal	whole skull	0	0	0		0		0	0	0	N/A	0	N/A	0		0		0	0	0	N/A	0	0	0		N/A	0		0	0	N/A	0	0	0		0	0		0	0
AG	1	L.v micro-CT	Caries- location 4	SMB 52B	10	8 to 12	10.5 to 11.5	U	labial/buccal	whole skull	0	0	0		0		0	0	0	N/A	0	N/A	0		0		0	0	0	N/A	0	0	0		N/A	0		0	0	N/A	0	0	0		0	0		0	0
AG	1	L.v micro-CT	Caries- location 5	SMB 52B	10	8 to 12	10.5 to 11.5	U	lingual	whole skull	0	0	0		0		0	0	0	N/A	0	N/A	0		0		0	0	0	N/A	0	0	0		N/A	0		0	0	N/A	0	0	0		0	0		0	0
AG	1	L.v micro-CT	Caries _ CEJ 1	SMB 52B	10	8 to 12	10.5 to 11.5	U	labial/buccal	whole skull	0	0	0		0		0	0	0	N/A	0	N/A	0		0		0	0	0	N/A	0	0	0		N/A	0		0	0	N/A	0	0	0		0	0		0	0
AG	1	L.v micro-CT	Caries _ CEJ 2	SMB 52B	10	8 to 12	10.5 to 11.5	U	labial/buccal	whole skull	0	0	0		0		0	0	0	N/A	0	N/A	0		0		0	0	0	N/A	0	0	0		N/A	0		0	0	N/A	0	0	0		0	0		0	0
AG	1	L.v micro-CT	Caries _ CEJ 3	SMB 52B	10	8 to 12	10.5 to 11.5	U	labial/buccal	whole skull	0	0	0		0		0	0	0	N/A	0	N/A	0		0		0	0	0	N/A	0	0	0		N/A	0		0	0	N/A	0	0	0		0	0		0	0
AG	1	L.v micro-CT	Caries - Radiolucency	SMB 52B	10	8 to 12	10.5 to 11.5	U	labial/buccal	whole skull	0	0	0		0		0	0	0	N/A	0	N/A	0		0		0	0	0	N/A	0	0	0		N/A	0		0	0	N/A	0	0	0		0	0		0	0
AG	1	L.v micro-CT	Alveolar status	SMB 52B	10	8 to 12	10.5 to 11.5	U	labial/buccal	whole skull					0		0	1	1	N/A					0		0	1	1	N/A					0	1		1	0	N/A					0	1		1	1
AG	1	L.v micro-CT	Periodontal disease	SMB 52B	10	8 to 12	10.5 to 11.5	U	labial/buccal	whole skull	1.87	1.78	1.6		0		0	2.2	0	N/A	1.7	N/A	0		0		0	1.92	0	N/A	1.5	1.28	4.39		N/A	1.42		0	0	N/A	1.22	1.98	1.18		0	1		0	0
AG	1	L.v micro-CT	Periodontal disease	SMB 52B	10	8 to 12	10.5 to 11.5	U	lingual	whole skull	1.08	1.1	0		0		0	1.6	0	N/A	1.1	N/A	0		0		0	1.6	0	N/A	1.4	1.2	0		N/A	0		0	0	N/A	1.63	1.14	0		0	0		N/A	0
AG	1	L.v micro-CT	Enamel hypoplastic defect - present	SMB 52B	10	8 to 12	10.5 to 11.5	U	labial/buccal	whole skull	1	1	1		0		0	1	0	N/A	0	N/A	1		0		0	1	0	N/A	1	1	1		N/A	0		1	0	N/A	1	1	1		N/A	0		0	0
AG	1	L.v micro-CT	Enamel hypoplastic defect - present	SMB 52B	10	8 to 12	10.5 to 11.5	U	lingual	whole skull	0	0	0		0		0	0	0	N/A	1	N/A	0		0		0	0	0	N/A	0	0	1		N/A	0		0	0	N/A	0	0	0		N/A	0		N/A	0
AG	1	L.v micro-CT	Enamel hypoplastic defect - type -linear	SMB 52B	10	8 to 12	10.5 to 11.5	U	labial/buccal	whole skull	1	1	1		0		0	2	0	N/A	0	N/A	1		0		0	1	0	N/A	1	1	1		N/A	0		0	0	N/A	1	1	1		N/A	0		0	0
AG	1	L.v micro-CT	Enamel hypoplastic defect - type -linear	SMB 52B	10	8 to 12	10.5 to 11.5	U	lingual	whole skull	0	0	0		0		0	0	0	N/A	2	N/A	0		0		0	0	0	N/A	0	0	1		N/A	0		2	0	N/A	0	0	0		N/A	0		N/A	0
AG	1	L.v micro-CT	Enamel hypoplastic defects-number of lines	SMB 52B	10	8 to 12	10.5 to 11.5	U	labial/buccal	whole skull	1	1	2		0		0	0	0	N/A	0	N/A	1		0		0	1	0	N/A	1	1	2		N/A	0		0	0	N/A	1	2	1		N/A	0		0	0
AG	1	L.v micro-CT	Enamel hypoplastic defects-number of lines	SMB 52B	10	8 to 12	10.5 to 11.5	U	lingual	whole skull	0	0	0		0		0	0	0	N/A	0	N/A	0		0		0	0	0	N/A	0	0	0		N/A	0		0	0	N/A	0	0	0		N/A	0		N/A	0
AG	1	L.v micro-CT	Enamel hypoplastic defect - type - pits	SMB 52B	10	8 to 12	10.5 to 11.5	U	labial/buccal	whole skull	2	2	2		0		0	0	0	N/A	0	N/A	1		0		0	2	0	N/A	1	1	2		N/A	0		0	0	N/A	1	2	1		N/A	0		0	0
AG	1	L.v micro-CT	Enamel hypoplastic defect - type - pits	SMB 52B	10	8 to 12	10.5 to 11.5	U	lingual	whole skull	0	0	0		0		0	0	0	N/A	1	N/A	0		0		0	0	0	N/A	0	0	2		N/A	0		0	0	N/A	0	0	0		N/A	0		N/A	0
AG	1	L.v micro-CT	Enamel hypoplastic defects-number of pits	SMB 52B	10	8 to 12	10.5 to 11.5	U	labial/buccal	whole skull	0	0	0		0		0	1	0	N/A	0	N/A	0		0		0	0	0	N/A	0	0	0		N/A	0		0	0	N/A	1	0	0		N/A	0		0	0
AG	1	L.v micro-CT	Enamel hypoplastic defects-number of pits	SMB 52B	10	8 to 12	10.5 to 11.5	U	lingual	whole skull	0	0	0		0		0	0	0	N/A	1	N/A	0		0		0	0	0	N/A	0	0	0		N/A	0		1	0	N/A	0	0	0		N/A	0		N/A	0
AG	1	L.v micro-CT	Enamel hypoplastic defect - measurement 1 (mm)	SMB 52B	10	8 to 12	10.5 to 11.5	U	labial/buccal	whole skull	3.06	4.03	1.75		0		0	5.63	0	N/A	0	N/A	1.86		0		0	2.2	0	N/A	3.21	4.35	2.21		N/A	0		0	0	N/A	3.71	1.85	4.88		N/A	0		0	0
AG	1	L.v micro-CT	Enamel hypoplastic defect - measurement 1 (mm)	SMB 52B	10	8 to 12	10.5 to 11.5	U	lingual	whole skull	0	0	0		0		0	0	0	N/A	7.6	N/A	0		0		0	0	0	N/A	0	0	2.59		N/A	0		1.54	0	N/A	0	0	0		N/A	0		N/A	0
AG	1	L.v micro-CT	Enamel hypoplastic defect - measurement 2 (mm)	SMB 52B	10	8 to 12	10.5 to 11.5	U	labial/buccal	whole skull	0	0	4.07		0		0	0	0	N/A	0	N/A	0		0		0	0	0	N/A	0	0	4.44		N/A	0		0	0	N/A	8.4	4.17	0		N/A	0		0	0
AG	1	L.v micro-CT	Enamel hypoplastic defect - measurement 2 (mm)	SMB 52B	10	8 to 12	10.5 to 11.5	U	lingual	whole skull	0	0	0		0		0	0	0	N/A	0	N/A	0		0		0	0	0	N/A	0	0	4.7		N/A	0		0	0	N/A	0	0	0		N/A	0		N/A	0
AG	1	L.v micro-CT	Enamel hypoplastic defect - measurement 3 (mm)	SMB 52B	10	8 to 12	10.5 to 11.5	U	labial/buccal	whole skull	0	0	0		0		0	0	0	N/A	0	N/A	0		0		0	0	0	N/A	0	0	0		N/A	0		0	0	N/A	0	0	0		N/A	0		0	0
AG	1	L.v micro-CT	Enamel hypoplastic defect - measurement 3 (mm)	SMB 52B	10	8 to 12	10.5 to 11.5	U	lingual	whole skull	0	0	0		0		0	0	0	N/A	0	N/A	0		0		0	0	0	N/A	0	0	0		N/A	0		0	0	N/A	0	0	0		N/A	0		N/A	0
AG	1	L.v micro-CT	Enamel hypoplastic defect - measurement 4 (mm)	SMB 52B	10	8 to 12	10.5 to 11.5	U	labial/buccal	whole skull	0	0	0		0		0	0	0	N/A	0	N/A	0		0		0	0	0	N/A	0	0	0		N/A	0		0	0	N/A	0	0	0		N/A	0		0	0
AG	1	L.v micro-CT	Enamel hypoplastic defect - measurement 4 (mm)	SMB 52B	10	8 to 12	10.5 to 11.5	U	lingual	whole skull	0	0	0		0		0	0	0	N/A	0	N/A	0		0		0	0	0	N/A	0	0	0		N/A	0		0	0	N/A	0	0	0		N/A	0		N/A	0
AG	1	L.v micro-CT	IGD - present	SMB 52B	10	8 to 12	10.5 to 11.5	U	internal	whole skull	0	0	0		0		0	0	0	N/A	0	N/A	0		0		0	0	0	N/A	0	0	0		N/A	0		0	0	N/A	0	0	0		N/A	0		0	0
AG	1	S.v micro-CT	Inventory	SMB 52B	10	8 to 12		U	labial/buccal	Individual tooth samples
AG	1	S.v micro-CT	Tooth Wear	SMB 52B	10	8 to 12		U	occlusal	Individual tooth samples	2	1
AG	1	S.v micro-CT	Dental Trauma	SMB 52B	10	8 to 12		U	labial/buccal	Individual tooth samples	3	0
AG	1	S.v micro-CT	Dental Trauma	SMB 52B	10	8 to 12		U	lingual	Individual tooth samples	3	0
AG	1	S.v micro-CT	Occlusion	SMB 52B	10	8 to 12		U	occlusal	Individual tooth samples
AG	1	S.v micro-CT	Overbite	SMB 52B	10	8 to 12		U	occlusal	Individual tooth samples
AG	1	S.v micro-CT	Overjet	SMB 52B	10	8 to 12		U	occlusal	Individual tooth samples
AG	1	S.v micro-CT	Caries - present on tooth	SMB 52B	10	8 to 12		U	All	Individual tooth samples	0	0
AG	1	S.v micro-CT	Caries- location 1	SMB 52B	10	8 to 12		U	mesial	Individual tooth samples	0	0															1			1
AG	1	S.v micro-CT	Caries- location 2	SMB 52B	10	8 to 12		U	distal	Individual tooth samples	0	0															1			2
AG	1	S.v micro-CT	Caries- location 3	SMB 52B	10	8 to 12		U	occlusal	Individual tooth samples	0	0															2			2
AG	1	S.v micro-CT	Caries- location 4	SMB 52B	10	8 to 12		U	labial/buccal	Individual tooth samples	0	0															2			2
AG	1	S.v micro-CT	Caries- location 5	SMB 52B	10	8 to 12		U	lingual	Individual tooth samples	0	0															2			2
AG	1	S.v micro-CT	Caries _ CEJ 1	SMB 52B	10	8 to 12		U	labial/buccal	Individual tooth samples	0	0															0			0
AG	1	S.v micro-CT	Caries _ CEJ 2	SMB 52B	10	8 to 12		U	labial/buccal	Individual tooth samples	0	0															0			0
AG	1	S.v micro-CT	Caries _ CEJ 3	SMB 52B	10	8 to 12		U	labial/buccal	Individual tooth samples	0	0															0			0
AG	1	S.v micro-CT	Caries - Radiolucency	SMB 52B	10	8 to 12		U	labial/buccal	Individual tooth samples	0	0															0			0
AG	1	S.v micro-CT	Alveolar status	SMB 52B	10	8 to 12		U	labial/buccal	Individual tooth samples
AG	1	S.v micro-CT	Periodontal disease	SMB 52B	10	8 to 12		U	labial/buccal	Individual tooth samples
AG	1	S.v micro-CT	Periodontal disease	SMB 52B	10	8 to 12		U	labial/buccal	Individual tooth samples
AG	1	S.v micro-CT	Enamel hypoplastic defect - present	SMB 52B	10	8 to 12		U	labial/buccal	Individual tooth samples	1	1															1			1
AG	1	S.v micro-CT	Enamel hypoplastic defect - present	SMB 52B	10	8 to 12		U	lingual	Individual tooth samples	0	0															0			1
AG	1	S.v micro-CT	Enamel hypoplastic defect - type -linear	SMB 52B	10	8 to 12		U	labial/buccal	Individual tooth samples	1	1															1			1
AG	1	S.v micro-CT	Enamel hypoplastic defect - type -linear	SMB 52B	10	8 to 12		U	lingual	Individual tooth samples	0	0															0			1
AG	1	S.v micro-CT	Enamel hypoplastic defects-number of lines	SMB 52B	10	8 to 12		U	labial/buccal	Individual tooth samples	1	1															2			1
AG	1	S.v micro-CT	Enamel hypoplastic defects-number of lines	SMB 52B	10	8 to 12		U	lingual	Individual tooth samples	0	0															0			1
AG	1	S.v micro-CT	Enamel hypoplastic defect - type - pits	SMB 52B	10	8 to 12		U	labial/buccal	Individual tooth samples	2	2															1			2
AG	1	S.v micro-CT	Enamel hypoplastic defect - type - pits	SMB 52B	10	8 to 12		U	lingual	Individual tooth samples	0	0															0			2
AG	1	S.v micro-CT	Enamel hypoplastic defects-number of pits	SMB 52B	10	8 to 12		U	labial/buccal	Individual tooth samples	0	0															2			0
AG	1	S.v micro-CT	Enamel hypoplastic defects-number of pits	SMB 52B	10	8 to 12		U	lingual	Individual tooth samples	0	0															0			0
AG	1	S.v micro-CT	Enamel hypoplastic defect - measurement 1 (mm)	SMB 52B	10	8 to 12		U	labial/buccal	Individual tooth samples	3.45	4															1.11			2.08
AG	1	S.v micro-CT	Enamel hypoplastic defect - measurement 1 (mm)	SMB 52B	10	8 to 12		U	lingual	Individual tooth samples	0	0															0			1.53
AG	1	S.v micro-CT	Enamel hypoplastic defect - measurement 2 (mm)	SMB 52B	10	8 to 12		U	labial/buccal	Individual tooth samples	0	0															1.92			0
AG	1	S.v micro-CT	Enamel hypoplastic defect - measurement 2 (mm)	SMB 52B	10	8 to 12		U	lingual	Individual tooth samples	0	0															0			0
AG	1	S.v micro-CT	Enamel hypoplastic defect - measurement 3 (mm)	SMB 52B	10	8 to 12		U	labial/buccal	Individual tooth samples	0	0															3.62			0
AG	1	S.v micro-CT	Enamel hypoplastic defect - measurement 3 (mm)	SMB 52B	10	8 to 12		U	lingual	Individual tooth samples	0	0															0			0
AG	1	S.v micro-CT	Enamel hypoplastic defect - measurement 4 (mm)	SMB 52B	10	8 to 12		U	labial/buccal	Individual tooth samples	0	0															0			0
AG	1	S.v micro-CT	Enamel hypoplastic defect - measurement 4 (mm)	SMB 52B	10	8 to 12		U	lingual	Individual tooth samples	0	0															0			0
AG	1	S.v micro-CT	IGD - present	SMB 52B	10	8 to 12		U	internal	Individual tooth samples	0	0															0			1
AG	2	Macro	Inventory	SMB 52B	10	8 to 12	10.5 to 11.5	U	labial/buccal	whole skull	2	2	2		2		2	2	1	4	2	4	2		2		2	2	1	4	2	2	2		1	2		2	1	4	2	2	2		1	2		2	1
AG	2	Macro	Tooth Wear	SMB 52B	10	8 to 12	10.5 to 11.5	U	occlusal	whole skull	2	2	1		1		1	2	1	N/A	2	N/A	1		1		1	2	1	N/A	2	2	2		N/A	3		2	2	N/A	3	2	2		1	3		2	1
AG	2	Macro	Dental Trauma	SMB 52B	10	8 to 12	10.5 to 11.5	U	labial/buccal	whole skull	2	0	0		0		0	0	0	N/A	2	N/A	0		0		0	0	0	N/A	0	0	1		N/A	0		0	0	N/A	1	0	0		0	0		0	0
AG	2	Macro	Dental Trauma	SMB 52B	10	8 to 12	10.5 to 11.5	U	lingual	whole skull	2	0	0		0		0	0	0	N/A	2	N/A	0		0		0	0	0	N/A	0	0	1		N/A	0		0	0	N/A	0	0	0		0	0		3	0
AG	2	Macro	Occlusion	SMB 52B	10	8 to 12	10.5 to 11.5	U	occlusal	whole skull
AG	2	Macro	Overbite	SMB 52B	10	8 to 12	10.5 to 11.5	U	labial/buccal	whole skull	2	1	N/A								2	N/A	N/A
AG	2	Macro	Overjet	SMB 52B	10	8 to 12	10.5 to 11.5	U	labial/buccal	whole skull	1.5	1	N/A								1.5	N/A	N/A
AG	2	Macro	Caries - present on tooth	SMB 52B	10	8 to 12	10.5 to 11.5	U	All	whole skull	0	0	0		0		0	0	0	N/A	0	N/A	0		0		0	0	0	N/A	0	0	0		N/A	0		0	0	N/A	0	0	0		0	0		0	0
AG	2	Macro	Caries- location 1	SMB 52B	10	8 to 12	10.5 to 11.5	U	mesial	whole skull	0	0	0		0		0	0	0	N/A	0	N/A	0		0		0	0	0	N/A	0	0	0		N/A	0		0	0	N/A	0	0	0		0	0		0	0
AG	2	Macro	Caries- location 2	SMB 52B	10	8 to 12	10.5 to 11.5	U	distal	whole skull	0	0	0		0		0	0	0	N/A	0	N/A	0		0		0	0	0	N/A	0	0	0		N/A	0		0	0	N/A	0	0	0		0	0		0	0
AG	2	Macro	Caries- location 3	SMB 52B	10	8 to 12	10.5 to 11.5	U	occlusal	whole skull	0	0	0		0		0	0	0	N/A	0	N/A	0		0		0	0	0	N/A	0	0	0		N/A	0		0	0	N/A	0	0	0		0	0		0	0
AG	2	Macro	Caries- location 4	SMB 52B	10	8 to 12	10.5 to 11.5	U	labial/buccal	whole skull	0	0	0		0		0	0	0	N/A	0	N/A	0		0		0	0	0	N/A	0	0	0		N/A	0		0	0	N/A	0	0	0		0	0		0	0
AG	2	Macro	Caries- location 5	SMB 52B	10	8 to 12	10.5 to 11.5	U	lingual	whole skull	0	0	0		0		0	0	0	N/A	0	N/A	0		0		0	0	0	N/A	0	0	0		N/A	0		0	0	N/A	0	0	0		0	0		0	0
AG	2	Macro	Caries _ CEJ 1	SMB 52B	10	8 to 12	10.5 to 11.5	U	labial/buccal	whole skull	0	0	0		0		0	0	0	N/A	0	N/A	0		0		0	0	0	N/A	0	0	0		N/A	0		0	0	N/A	0	0	0		0	0		0	0
AG	2	Macro	Caries _ CEJ 2	SMB 52B	10	8 to 12	10.5 to 11.5	U	labial/buccal	whole skull	0	0	0		0		0	0	0	N/A	0	N/A	0		0		0	0	0	N/A	0	0	0		N/A	0		0	0	N/A	0	0	0		0	0		0	0
AG	2	Macro	Caries _ CEJ 3	SMB 52B	10	8 to 12	10.5 to 11.5	U	labial/buccal	whole skull	0	0	0		0		0	0	0	N/A	0	N/A	0		0		0	0	0	N/A	0	0	0		N/A	0		0	0	N/A	0	0	0		0	0		0	0
AG	2	Macro	Caries - Radiolucency	SMB 52B	10	8 to 12	10.5 to 11.5	U	labial/buccal	whole skull
AG	2	Macro	Alveolar status	SMB 52B	10	8 to 12	10.5 to 11.5	U	labial/buccal	whole skull					0		0	0	0	0					0		0	0	0	0					1	1		1	1	0					1	1		1	1
AG	2	Macro	Periodontal disease	SMB 52B	10	8 to 12	10.5 to 11.5	U	labial/buccal	whole skull	2.5	1	0		0		0	2	0	N/A	1	N/A	4		0		0	1	0	N/A	1	1	0		N/A	1		0	0	N/A	1	1	1		0	1		0	0
AG	2	Macro	Periodontal disease	SMB 52B	10	8 to 12	10.5 to 11.5	U	lingual	whole skull	1	0	0		0		0	1	0	N/A	1	N/A	0		0		0	0	0	N/A	0.5	0.5	0		N/A	1		0	0	N/A	1	1	0		0	1		0	0
AG	2	Macro	Enamel hypoplastic defect - present	SMB 52B	10	8 to 12	10.5 to 11.5	U	labial/buccal	whole skull	0	0	0		0		0	0	0	N/A	0	N/A	0		0		0	0	0	N/A	0	0	0		N/A	0		0	0	N/A	0	0	0		0	0		0	0
AG	2	Macro	Enamel hypoplastic defect - present	SMB 52B	10	8 to 12	10.5 to 11.5	U	lingual	whole skull	0	0	0		0		0	0	0	N/A	0	N/A	0		0		0	0	0	N/A	0	0	0		N/A	0		0	0	N/A	0	0	0		0	0		0	0
AG	2	Macro	Enamel hypoplastic defect - type -linear	SMB 52B	10	8 to 12	10.5 to 11.5	U	labial/buccal	whole skull	0	0	0		0		0	0	0	N/A	0	N/A	0		0		0	0	0	N/A	0	0	0		N/A	0		0	0	N/A	0	0	0		0	0		0	0
AG	2	Macro	Enamel hypoplastic defect - type -linear	SMB 52B	10	8 to 12	10.5 to 11.5	U	lingual	whole skull	0	0	0		0		0	0	0	N/A	0	N/A	0		0		0	0	0	N/A	0	0	0		N/A	0		0	0	N/A	0	0	0		0	0		0	0
AG	2	Macro	Enamel hypoplastic defects-number of lines	SMB 52B	10	8 to 12	10.5 to 11.5	U	labial/buccal	whole skull	0	0	0		0		0	0	0	N/A	0	N/A	0		0		0	0	0	N/A	0	0	0		N/A	0		0	0	N/A	0	0	0		0	0		0	0
AG	2	Macro	Enamel hypoplastic defects-number of lines	SMB 52B	10	8 to 12	10.5 to 11.5	U	lingual	whole skull	0	0	0		0		0	0	0	N/A	0	N/A	0		0		0	0	0	N/A	0	0	0		N/A	0		0	0	N/A	0	0	0		0	0		0	0
AG	2	Macro	Enamel hypoplastic defect - type - pits	SMB 52B	10	8 to 12	10.5 to 11.5	U	labial/buccal	whole skull	0	0	0		0		0	0	0	N/A	0	N/A	0		0		0	0	0	N/A	0	0	0		N/A	0		0	0	N/A	0	0	0		0	0		0	0
AG	2	Macro	Enamel hypoplastic defect - type - pits	SMB 52B	10	8 to 12	10.5 to 11.5	U	lingual	whole skull	0	0	0		0		0	0	0	N/A	0	N/A	0		0		0	0	0	N/A	0	0	0		N/A	0		0	0	N/A	0	0	0		0	0		0	0
AG	2	Macro	Enamel hypoplastic defects-number of pits	SMB 52B	10	8 to 12	10.5 to 11.5	U	labial/buccal	whole skull	0	0	0		0		0	0	0	N/A	0	N/A	0		0		0	0	0	N/A	0	0	0		N/A	0		0	0	N/A	0	0	0		0	0		0	0
AG	2	Macro	Enamel hypoplastic defects-number of pits	SMB 52B	10	8 to 12	10.5 to 11.5	U	lingual	whole skull	0	0	0		0		0	0	0	N/A	0	N/A	0		0		0	0	0	N/A	0	0	0		N/A	0		0	0	N/A	0	0	0		0	0		0	0
AG	2	Macro	Enamel hypoplastic defect - measurement 1 (mm)	SMB 52B	10	8 to 12	10.5 to 11.5	U	labial/buccal	whole skull	0	0	0		0		0	0	0	N/A	0	N/A	0		0		0	0	0	N/A	0	0	0		N/A	0		0	0	N/A	0	0	0		0	0		0	0
AG	2	Macro	Enamel hypoplastic defect - measurement 1 (mm)	SMB 52B	10	8 to 12	10.5 to 11.5	U	lingual	whole skull	0	0	0		0		0	0	0	N/A	0	N/A	0		0		0	0	0	N/A	0	0	0		N/A	0		0	0	N/A	0	0	0		0	0		0	0
AG	2	Macro	Enamel hypoplastic defect - measurement 2 (mm)	SMB 52B	10	8 to 12	10.5 to 11.5	U	labial/buccal	whole skull	0	0	0		0		0	0	0	N/A	0	N/A	0		0		0	0	0	N/A	0	0	0		N/A	0		0	0	N/A	0	0	0		0	0		0	0
AG	2	Macro	Enamel hypoplastic defect - measurement 2 (mm)	SMB 52B	10	8 to 12	10.5 to 11.5	U	lingual	whole skull	0	0	0		0		0	0	0	N/A	0	N/A	0		0		0	0	0	N/A	0	0	0		N/A	0		0	0	N/A	0	0	0		0	0		0	0
AG	2	Macro	Enamel hypoplastic defect - measurement 3 (mm)	SMB 52B	10	8 to 12	10.5 to 11.5	U	labial/buccal	whole skull	0	0	0		0		0	0	0	N/A	0	N/A	0		0		0	0	0	N/A	0	0	0		N/A	0		0	0	N/A	0	0	0		0	0		0	0
AG	2	Macro	Enamel hypoplastic defect - measurement 3 (mm)	SMB 52B	10	8 to 12	10.5 to 11.5	U	lingual	whole skull	0	0	0		0		0	0	0	N/A	0	N/A	0		0		0	0	0	N/A	0	0	0		N/A	0		0	0	N/A	0	0	0		0	0		0	0
AG	2	Macro	Enamel hypoplastic defect - measurement 4 (mm)	SMB 52B	10	8 to 12	10.5 to 11.5	U	labial/buccal	whole skull	0	0	0		0		0	0	0	N/A	0	N/A	0		0		0	0	0	N/A	0	0	0		N/A	0		0	0	N/A	0	0	0		0	0		0	0
AG	2	Macro	Enamel hypoplastic defect - measurement 4 (mm)	SMB 52B	10	8 to 12	10.5 to 11.5	U	lingual	whole skull	0	0	0		0		0	0	0	N/A	0	N/A	0		0		0	0	0	N/A	0	0	0		N/A	0		0	0	N/A	0	0	0		0	0		0	0
AG	2	Macro	IGD - present	SMB 52B	10	8 to 12	10.5 to 11.5	U	internal	whole skull
AG	2	Radiographic	Inventory	SMB 52B	10	8 to 12	10.5 to 11.5	U	labial/buccal	whole skull	2	2	2		2		2	2	1	1	2	4	2		2		1	2	1	1	2	2	2		1	2		2	2	4	2	2	2		1	2		2	2
AG	2	Radiographic	Tooth Wear	SMB 52B	10	8 to 12	10.5 to 11.5	U	occlusal	whole skull	2	2	2		2		2	2	N/A	N/A	2	N/A	2		2		2	2	N/A	N/A	2	2	2		N/A	2		2	2	N/A	2	2	2		2	2		2	2
AG	2	Radiographic	Dental Trauma	SMB 52B	10	8 to 12	10.5 to 11.5	U	labial/buccal	whole skull	3	0	0		0		0	0	0	0	2	N/A	3		0		0	0	0	N/A	3	0	0		N/A	0		0	0	N/A	0	3	0		0	0		0	0
AG	2	Radiographic	Dental Trauma	SMB 52B	10	8 to 12	10.5 to 11.5	U	lingual	whole skull
AG	2	Radiographic	Occlusion	SMB 52B	10	8 to 12	10.5 to 11.5	U	Occlusal	whole skull
AG	2	Radiographic	Overbite	SMB 52B	10	8 to 12	10.5 to 11.5	U	occlusal	whole skull
AG	2	Radiographic	Overjet	SMB 52B	10	8 to 12	10.5 to 11.5	U	occlusal	whole skull												N/A
AG	2	Radiographic	Caries - present on tooth	SMB 52B	10	8 to 12	10.5 to 11.5	U	All	whole skull	0	0	0		0		0	0	0	N/A	0	N/A	0		0		0	0	0	N/A	0	0	0		N/A	0		0	0	N/A	0	0	0		0	0		0	0
AG	2	Radiographic	Caries- location 1	SMB 52B	10	8 to 12	10.5 to 11.5	U	mesial	whole skull	0	0	0		0		0	0	0	N/A	0	N/A	0		0		0	0	0	N/A	0	0	0		N/A	0		0	0	N/A	0	0	0		0	0		0	0
AG	2	Radiographic	Caries- location 2	SMB 52B	10	8 to 12	10.5 to 11.5	U	distal	whole skull	0	0	0		0		0	0	0	N/A	0	N/A	0		0		0	0	0	N/A	0	0	0		N/A	0		0	0	N/A	0	0	0		0	0		0	0
AG	2	Radiographic	Caries- location 3	SMB 52B	10	8 to 12	10.5 to 11.5	U	occlusal	whole skull	0	0	0		0		0	0	0	N/A	0	N/A	0		0		0	0	0	N/A	0	0	0		N/A	0		0	0	N/A	0	0	0		0	0		0	0
AG	2	Radiographic	Caries- location 4	SMB 52B	10	8 to 12	10.5 to 11.5	U	labial/buccal	whole skull	0	0	0		0		0	0	0	N/A	0	N/A	0		0		0	0	0	N/A	0	0	0		N/A	0		0	0	N/A	0	0	0		0	0		0	0
AG	2	Radiographic	Caries- location 5	SMB 52B	10	8 to 12	10.5 to 11.5	U	lingual	whole skull	0	0	0		0		0	0	0	N/A	0	N/A	0		0		0	0	0	N/A	0	0	0		N/A	0		0	0	N/A	0	0	0		0	0		0	0
AG	2	Radiographic	Caries _ CEJ 1	SMB 52B	10	8 to 12	10.5 to 11.5	U	labial/buccal	whole skull	0	0	0		0		0	0	0	N/A	0	N/A	0		0		0	0	0	N/A	0	0	0		N/A	0		0	0	N/A	0	0	0		0	0		0	0
AG	2	Radiographic	Caries _ CEJ 2	SMB 52B	10	8 to 12	10.5 to 11.5	U	labial/buccal	whole skull	0	0	0		0		0	0	0	N/A	0	N/A	0		0		0	0	0	N/A	0	0	0		N/A	0		0	0	N/A	0	0	0		0	0		0	0
AG	2	Radiographic	Caries _ CEJ 3	SMB 52B	10	8 to 12	10.5 to 11.5	U	labial/buccal	whole skull	0	0	0		0		0	0	0	N/A	0	N/A	0		0		0	0	0	N/A	0	0	0		N/A	0		0	0	N/A	0	0	0		0	0		0	0
AG	2	Radiographic	Caries - Radiolucency	SMB 52B	10	8 to 12	10.5 to 11.5	U	labial/buccal	whole skull	0	0	0		0		0	0	0	N/A	0	N/A	0		0		0	0	0	N/A	0	0	0		N/A	0		0	0	N/A	0	0	0		0	0		0	0
AG	2	Radiographic	Alveolar status	SMB 52B	10	8 to 12	10.5 to 11.5	U	labial/buccal	whole skull
AG	2	Radiographic	Periodontal disease	SMB 52B	10	8 to 12	10.5 to 11.5	U	labial/buccal	whole skull
AG	2	Radiographic	Periodontal disease	SMB 52B	10	8 to 12	10.5 to 11.5	U	lingual	whole skull
AG	2	Radiographic	Enamel hypoplastic defect - present	SMB 52B	10	8 to 12	10.5 to 11.5	U	labial/buccal	whole skull
AG	2	Radiographic	Enamel hypoplastic defect - present	SMB 52B	10	8 to 12	10.5 to 11.5	U	lingual	whole skull
AG	2	Radiographic	Enamel hypoplastic defect - type -linear	SMB 52B	10	8 to 12	10.5 to 11.5	U	labial/buccal	whole skull
AG	2	Radiographic	Enamel hypoplastic defect - type -linear	SMB 52B	10	8 to 12	10.5 to 11.5	U	lingual	whole skull
AG	2	Radiographic	Enamel hypoplastic defects-number of lines	SMB 52B	10	8 to 12	10.5 to 11.5	U	labial/buccal	whole skull
AG	2	Radiographic	Enamel hypoplastic defects-number of lines	SMB 52B	10	8 to 12	10.5 to 11.5	U	lingual	whole skull
AG	2	Radiographic	Enamel hypoplastic defect - type - pits	SMB 52B	10	8 to 12	10.5 to 11.5	U	labial/buccal	whole skull
AG	2	Radiographic	Enamel hypoplastic defect - type - pits	SMB 52B	10	8 to 12	10.5 to 11.5	U	lingual	whole skull
AG	2	Radiographic	Enamel hypoplastic defects-number of pits	SMB 52B	10	8 to 12	10.5 to 11.5	U	labial/buccal	whole skull
AG	2	Radiographic	Enamel hypoplastic defects-number of pits	SMB 52B	10	8 to 12	10.5 to 11.5	U	lingual	whole skull
AG	2	Radiographic	Enamel hypoplastic defect - measurement 1 (mm)	SMB 52B	10	8 to 12	10.5 to 11.5	U	labial/buccal	whole skull
AG	2	Radiographic	Enamel hypoplastic defect - measurement 1 (mm)	SMB 52B	10	8 to 12	10.5 to 11.5	U	lingual	whole skull
AG	2	Radiographic	Enamel hypoplastic defect - measurement 2 (mm)	SMB 52B	10	8 to 12	10.5 to 11.5	U	labial/buccal	whole skull
AG	2	Radiographic	Enamel hypoplastic defect - measurement 2 (mm)	SMB 52B	10	8 to 12	10.5 to 11.5	U	lingual	whole skull
AG	2	Radiographic	Enamel hypoplastic defect - measurement 3 (mm)	SMB 52B	10	8 to 12	10.5 to 11.5	U	labial/buccal	whole skull
AG	2	Radiographic	Enamel hypoplastic defect - measurement 3 (mm)	SMB 52B	10	8 to 12	10.5 to 11.5	U	lingual	whole skull
AG	2	Radiographic	Enamel hypoplastic defect - measurement 4 (mm)	SMB 52B	10	8 to 12	10.5 to 11.5	U	labial/buccal	whole skull
AG	2	Radiographic	Enamel hypoplastic defect - measurement 4 (mm)	SMB 52B	10	8 to 12	10.5 to 11.5	U	lingual	whole skull
AG	2	Radiographic	IGD - present	SMB 52B	10	8 to 12	10.5 to 11.5	U	internal	whole skull
AG	2	L.v micro-CT	Inventory	SMB 52B	10	8 to 12	10.5 to 11.5	U	labial/buccal	whole skull	2	2	2		2		2	2	1	N/A	2	4	2		2		2	2	1	N/A	2	2	2		1	2		2	2	N/A	2	2	2		1	2		2	1
AG	2	L.v micro-CT	Tooth Wear	SMB 52B	10	8 to 12	10.5 to 11.5	U	occlusal	whole skull	2	2	2		2		2	2	1	N/A	2	N/A	2		2		2	2	1	N/A	3	2	2		N/A	3		2	2	N/A	3	2	2		1	4		3	1
AG	2	L.v micro-CT	Dental Trauma	SMB 52B	10	8 to 12	10.5 to 11.5	U	labial/buccal	whole skull	0	0	0		0		0	0	0	N/A	0	0	0		0		0	0	0	N/A	0	0	0		N/A	0		0	0	N/A	0	0	0		0	0		0	0
AG	2	L.v micro-CT	Dental Trauma	SMB 52B	10	8 to 12	10.5 to 11.5	U	lingual	whole skull	0	0	0		0		0	0	0	N/A	0	0	0		0		0	0	0	N/A	0	0	0		N/A	0		0	0	N/A	0	0	0		0	0		0	0
AG	2	L.v micro-CT	Occlusion	SMB 52B	10	8 to 12	10.5 to 11.5	U	occlusal	whole skull
AG	2	L.v micro-CT	Overbite	SMB 52B	10	8 to 12	10.5 to 11.5	U	occlusal	whole skull	2	1									2	N/A	N/A
AG	2	L.v micro-CT	Overjet	SMB 52B	10	8 to 12	10.5 to 11.5	U	occlusal	whole skull	3	2.93	N/A								3.01	N/A	N/A
AG	2	L.v micro-CT	Caries - present on tooth	SMB 52B	10	8 to 12	10.5 to 11.5	U	All	whole skull	0	0	0		0		0	0	0	N/A	0	N/A	0		0		0	0	0	N/A	0	0	0		N/A	0		0	0	N/A	0	0	0		0	0		0	0
AG	2	L.v micro-CT	Caries- location 1	SMB 52B	10	8 to 12	10.5 to 11.5	U	mesial	whole skull	0	0	0		0		0	0	0	N/A	0	N/A	0		0		0	0	0	N/A	0	0	0		N/A	0		0	0	N/A	0	0	0		0	0		0	0
AG	2	L.v micro-CT	Caries- location 2	SMB 52B	10	8 to 12	10.5 to 11.5	U	distal	whole skull	0	0	0		0		0	0	0	N/A	0	N/A	0		0		0	0	0	N/A	0	0	0		N/A	0		0	0	N/A	0	0	0		0	0		0	0
AG	2	L.v micro-CT	Caries- location 3	SMB 52B	10	8 to 12	10.5 to 11.5	U	occlusal	whole skull	0	0	0		0		0	0	0	N/A	0	N/A	0		0		0	0	0	N/A	0	0	0		N/A	0		0	0	N/A	0	0	0		0	0		0	0
AG	2	L.v micro-CT	Caries- location 4	SMB 52B	10	8 to 12	10.5 to 11.5	U	labial/buccal	whole skull	0	0	0		0		0	0	0	N/A	0	N/A	0		0		0	0	0	N/A	0	0	0		N/A	0		0	0	N/A	0	0	0		0	0		0	0
AG	2	L.v micro-CT	Caries- location 5	SMB 52B	10	8 to 12	10.5 to 11.5	U	lingual	whole skull	0	0	0		0		0	0	0	N/A	0	N/A	0		0		0	0	0	N/A	0	0	0		N/A	0		0	0	N/A	0	0	0		0	0		0	0
AG	2	L.v micro-CT	Caries _ CEJ 1	SMB 52B	10	8 to 12	10.5 to 11.5	U	labial/buccal	whole skull	0	0	0		0		0	0	0	N/A	0	N/A	0		0		0	0	0	N/A	0	0	0		N/A	0		0	0	N/A	0	0	0		0	0		0	0
AG	2	L.v micro-CT	Caries _ CEJ 2	SMB 52B	10	8 to 12	10.5 to 11.5	U	labial/buccal	whole skull	0	0	0		0		0	0	0	N/A	0	N/A	0		0		0	0	0	N/A	0	0	0		N/A	0		0	0	N/A	0	0	0		0	0		0	0
AG	2	L.v micro-CT	Caries _ CEJ 3	SMB 52B	10	8 to 12	10.5 to 11.5	U	labial/buccal	whole skull	0	0	0		0		0	0	0	N/A	0	N/A	0		0		0	0	0	N/A	0	0	0		N/A	0		0	0	N/A	0	0	0		0	0		0	0
AG	2	L.v micro-CT	Caries - Radiolucency	SMB 52B	10	8 to 12	10.5 to 11.5	U	labial/buccal	whole skull	0	0	0		0		0	0	0	N/A	0	N/A	0		0		0	0	0	N/A	0	0	0		N/A	0		0	0	N/A	0	0	0		0	0		0	0
AG	2	L.v micro-CT	Alveolar status	SMB 52B	10	8 to 12	10.5 to 11.5	U	labial/buccal	whole skull					0		0	1	1	N/A					0		0	1	1	N/A					0	1		1	0	N/A					0	1		1	1
AG	2	L.v micro-CT	Periodontal disease	SMB 52B	10	8 to 12	10.5 to 11.5	U	labial/buccal	whole skull	1.9	1.85	1.5		0		0	2	0	N/A	1.65	N/A	5.65		0		0	2	0	N/A	1.5	1.3	4.4		N/A	1.5		0	0	N/A	1	2	1.2		0	1		0	0
AG	2	L.v micro-CT	Periodontal disease	SMB 52B	10	8 to 12	10.5 to 11.5	U	lingual	whole skull	1	1	0		0		0	1.5	0	N/A	1	N/A	0		0		0	1.5	0	N/A	1.4	1	0		N/A	0		0	0	N/A	1.72	1.15	0		0	1		N/A	0
AG	2	L.v micro-CT	Enamel hypoplastic defect - present	SMB 52B	10	8 to 12	10.5 to 11.5	U	labial/buccal	whole skull	1	1	1		0		0	1	0	N/A	0	N/A	1		0		0	1	0	N/A	1	1	1		N/A	0		1	0	N/A	1	1	1		N/A	0		0	0
AG	2	L.v micro-CT	Enamel hypoplastic defect - present	SMB 52B	10	8 to 12	10.5 to 11.5	U	lingual	whole skull	0	0	0		0		0	0	0	N/A	1	N/A	0		0		0	0	0	N/A	0	0	1		N/A	0		0	0	N/A	0	0	0		N/A	0		N/A	0
AG	2	L.v micro-CT	Enamel hypoplastic defect - type -linear	SMB 52B	10	8 to 12	10.5 to 11.5	U	labial/buccal	whole skull	1	1	1		0		0	2	0	N/A	0	N/A	1		0		0	1	0	N/A	1	1	1		N/A	0		0	0	N/A	1	1	1		N/A	0		0	0
AG	2	L.v micro-CT	Enamel hypoplastic defect - type -linear	SMB 52B	10	8 to 12	10.5 to 11.5	U	lingual	whole skull	0	0	0		0		0	0	0	N/A	2	N/A	0		0		0	0	0	N/A	0	0	1		N/A	0		2	0	N/A	0	0	0		N/A	0		N/A	0
AG	2	L.v micro-CT	Enamel hypoplastic defects-number of lines	SMB 52B	10	8 to 12	10.5 to 11.5	U	labial/buccal	whole skull	1	1	2		0		0	0	0	N/A	0	N/A	1		0		0	1	0	N/A	1	1	2		N/A	0		0	0	N/A	1	2	1		N/A	0		0	0
AG	2	L.v micro-CT	Enamel hypoplastic defects-number of lines	SMB 52B	10	8 to 12	10.5 to 11.5	U	lingual	whole skull	0	0	0		0		0	0	0	N/A	0	N/A	0		0		0	0	0	N/A	0	0	0		N/A	0		0	0	N/A	0	0	0		N/A	0		N/A	0
AG	2	L.v micro-CT	Enamel hypoplastic defect - type - pits	SMB 52B	10	8 to 12	10.5 to 11.5	U	labial/buccal	whole skull	2	2	2		0		0	0	0	N/A	0	N/A	1		0		0	2	0	N/A	1	1	2		N/A	0		0	0	N/A	1	2	1		N/A	0		0	0
AG	2	L.v micro-CT	Enamel hypoplastic defect - type - pits	SMB 52B	10	8 to 12	10.5 to 11.5	U	lingual	whole skull	0	0	0		0		0	0	0	N/A	1	N/A	0		0		0	0	0	N/A	0	0	2		N/A	0		0	0	N/A	0	0	0		N/A	0		N/A	0
AG	2	L.v micro-CT	Enamel hypoplastic defects-number of pits	SMB 52B	10	8 to 12	10.5 to 11.5	U	labial/buccal	whole skull	0	0	0		0		0	1	0	N/A	0	N/A	0		0		0	0	0	N/A	0	0	0		N/A	0		0	0	N/A	1	0	0		N/A	0		0	0
AG	2	L.v micro-CT	Enamel hypoplastic defects-number of pits	SMB 52B	10	8 to 12	10.5 to 11.5	U	lingual	whole skull	0	0	0		0		0	0	0	N/A	1	N/A	0		0		0	0	0	N/A	0	0	0		N/A	0		1	0	N/A	0	0	0		N/A	0		N/A	0
AG	2	L.v micro-CT	Enamel hypoplastic defect - measurement 1 (mm)	SMB 52B	10	8 to 12	10.5 to 11.5	U	labial/buccal	whole skull	3	4	1.8		0		0	5.5	0	N/A	0	N/A	2		0		0	2	0	N/A	3.2	4.5	2		N/A	0		0	0	N/A	3.8	1.8	5		N/A	0		0	0
AG	2	L.v micro-CT	Enamel hypoplastic defect - measurement 1 (mm)	SMB 52B	10	8 to 12	10.5 to 11.5	U	lingual	whole skull	0	0	0		0		0	0	0	N/A	7.5	N/A	0		0		0	0	0	N/A	0	0	2.5		N/A	0		1.5	0	N/A	0	0	0		N/A	0		N/A	0
AG	2	L.v micro-CT	Enamel hypoplastic defect - measurement 2 (mm)	SMB 52B	10	8 to 12	10.5 to 11.5	U	labial/buccal	whole skull	0	0	4		0		0	0	0	N/A	0	N/A	0		0		0	0	0	N/A	0	0	4.5		N/A	0		0	0	N/A	8.5	4.2	0		N/A	0		0	0
AG	2	L.v micro-CT	Enamel hypoplastic defect - measurement 2 (mm)	SMB 52B	10	8 to 12	10.5 to 11.5	U	lingual	whole skull	0	0	0		0		0	0	0	N/A	0	N/A	0		0		0	0	0	N/A	0	0	4.75		N/A	0		0	0	N/A	0	0	0		N/A	0		N/A	0
AG	2	L.v micro-CT	Enamel hypoplastic defect - measurement 3 (mm)	SMB 52B	10	8 to 12	10.5 to 11.5	U	labial/buccal	whole skull	0	0	0		0		0	0	0	N/A	0	N/A	0		0		0	0	0	N/A	0	0	0		N/A	0		0	0	N/A	0	0	0		N/A	0		0	0
AG	2	L.v micro-CT	Enamel hypoplastic defect - measurement 3 (mm)	SMB 52B	10	8 to 12	10.5 to 11.5	U	lingual	whole skull	0	0	0		0		0	0	0	N/A	0	N/A	0		0		0	0	0	N/A	0	0	0		N/A	0		0	0	N/A	0	0	0		N/A	0		N/A	0
AG	2	L.v micro-CT	Enamel hypoplastic defect - measurement 4 (mm)	SMB 52B	10	8 to 12	10.5 to 11.5	U	labial/buccal	whole skull	0	0	0		0		0	0	0	N/A	0	N/A	0		0		0	0	0	N/A	0	0	0		N/A	0		0	0	N/A	0	0	0		N/A	0		0	0
AG	2	L.v micro-CT	Enamel hypoplastic defect - measurement 4 (mm)	SMB 52B	10	8 to 12	10.5 to 11.5	U	lingual	whole skull	0	0	0		0		0	0	0	N/A	0	N/A	0		0		0	0	0	N/A	0	0	0		N/A	0		0	0	N/A	0	0	0		N/A	0		N/A	0
AG	2	L.v micro-CT	IGD - present	SMB 52B	10	8 to 12	10.5 to 11.5	U	internal	whole skull	0	0	0		0		0	0	0	N/A	0	N/A	0		0		0	0	0	N/A	0	0	0		N/A	0		0	0	N/A	0	0	0		N/A	0		0	0
AG	2	S.v micro-CT	Inventory	SMB 52B	10	8 to 12		U	labial/buccal	Individual tooth samples
AG	2	S.v micro-CT	Tooth Wear	SMB 52B	10	8 to 12		U	occlusal	Individual tooth samples	2	1
AG	2	S.v micro-CT	Dental Trauma	SMB 52B	10	8 to 12		U	labial/buccal	Individual tooth samples	3	0
AG	2	S.v micro-CT	Dental Trauma	SMB 52B	10	8 to 12		U	lingual	Individual tooth samples	3	0
AG	2	S.v micro-CT	Occlusion	SMB 52B	10	8 to 12		U	occlusal	Individual tooth samples
AG	2	S.v micro-CT	Overbite	SMB 52B	10	8 to 12		U	occlusal	Individual tooth samples
AG	2	S.v micro-CT	Overjet	SMB 52B	10	8 to 12		U	occlusal	Individual tooth samples
AG	2	S.v micro-CT	Caries - present on tooth	SMB 52B	10	8 to 12		U	All	Individual tooth samples	0	0
AG	2	S.v micro-CT	Caries- location 1	SMB 52B	10	8 to 12		U	mesial	Individual tooth samples	0	0															1			1
AG	2	S.v micro-CT	Caries- location 2	SMB 52B	10	8 to 12		U	distal	Individual tooth samples	0	0															1			2
AG	2	S.v micro-CT	Caries- location 3	SMB 52B	10	8 to 12		U	occlusal	Individual tooth samples	0	0															2			2
AG	2	S.v micro-CT	Caries- location 4	SMB 52B	10	8 to 12		U	labial/buccal	Individual tooth samples	0	0															2			2
AG	2	S.v micro-CT	Caries- location 5	SMB 52B	10	8 to 12		U	lingual	Individual tooth samples	0	0															2			2
AG	2	S.v micro-CT	Caries _ CEJ 1	SMB 52B	10	8 to 12		U	labial/buccal	Individual tooth samples	0	0															0			0
AG	2	S.v micro-CT	Caries _ CEJ 2	SMB 52B	10	8 to 12		U	labial/buccal	Individual tooth samples	0	0															0			0
AG	2	S.v micro-CT	Caries _ CEJ 3	SMB 52B	10	8 to 12		U	labial/buccal	Individual tooth samples	0	0															0			0
AG	2	S.v micro-CT	Caries - Radiolucency	SMB 52B	10	8 to 12		U	labial/buccal	Individual tooth samples	0	0															0			0
AG	2	S.v micro-CT	Alveolar status	SMB 52B	10	8 to 12		U	labial/buccal	Individual tooth samples
AG	2	S.v micro-CT	Periodontal disease	SMB 52B	10	8 to 12		U	labial/buccal	Individual tooth samples
AG	2	S.v micro-CT	Periodontal disease	SMB 52B	10	8 to 12		U	labial/buccal	Individual tooth samples
AG	2	S.v micro-CT	Enamel hypoplastic defect - present	SMB 52B	10	8 to 12		U	labial/buccal	Individual tooth samples	1	1															1			1
AG	2	S.v micro-CT	Enamel hypoplastic defect - present	SMB 52B	10	8 to 12		U	lingual	Individual tooth samples	0	0															0			1
AG	2	S.v micro-CT	Enamel hypoplastic defect - type -linear	SMB 52B	10	8 to 12		U	labial/buccal	Individual tooth samples	1	1															1			1
AG	2	S.v micro-CT	Enamel hypoplastic defect - type -linear	SMB 52B	10	8 to 12		U	lingual	Individual tooth samples	0	0															0			1
AG	2	S.v micro-CT	Enamel hypoplastic defects-number of lines	SMB 52B	10	8 to 12		U	labial/buccal	Individual tooth samples	1	1															2			1
AG	2	S.v micro-CT	Enamel hypoplastic defects-number of lines	SMB 52B	10	8 to 12		U	lingual	Individual tooth samples	0	0															0			1
AG	2	S.v micro-CT	Enamel hypoplastic defect - type - pits	SMB 52B	10	8 to 12		U	labial/buccal	Individual tooth samples	2	2															1			2
AG	2	S.v micro-CT	Enamel hypoplastic defect - type - pits	SMB 52B	10	8 to 12		U	lingual	Individual tooth samples	0	0															0			2
AG	2	S.v micro-CT	Enamel hypoplastic defects-number of pits	SMB 52B	10	8 to 12		U	labial/buccal	Individual tooth samples	0	0															2			0
AG	2	S.v micro-CT	Enamel hypoplastic defects-number of pits	SMB 52B	10	8 to 12		U	lingual	Individual tooth samples	0	0															0			0
AG	2	S.v micro-CT	Enamel hypoplastic defect - measurement 1 (mm)	SMB 52B	10	8 to 12		U	labial/buccal	Individual tooth samples	3.5	4															1.11			2.08
AG	2	S.v micro-CT	Enamel hypoplastic defect - measurement 1 (mm)	SMB 52B	10	8 to 12		U	lingual	Individual tooth samples	0	0															0			1.53
AG	2	S.v micro-CT	Enamel hypoplastic defect - measurement 2 (mm)	SMB 52B	10	8 to 12		U	labial/buccal	Individual tooth samples	0	0															1.92			0
AG	2	S.v micro-CT	Enamel hypoplastic defect - measurement 2 (mm)	SMB 52B	10	8 to 12		U	lingual	Individual tooth samples	0	0															0			0
AG	2	S.v micro-CT	Enamel hypoplastic defect - measurement 3 (mm)	SMB 52B	10	8 to 12		U	labial/buccal	Individual tooth samples	0	0															3.62			0
AG	2	S.v micro-CT	Enamel hypoplastic defect - measurement 3 (mm)	SMB 52B	10	8 to 12		U	lingual	Individual tooth samples	0	0															0			0
AG	2	S.v micro-CT	Enamel hypoplastic defect - measurement 4 (mm)	SMB 52B	10	8 to 12		U	labial/buccal	Individual tooth samples	0	0															0			0
AG	2	S.v micro-CT	Enamel hypoplastic defect - measurement 4 (mm)	SMB 52B	10	8 to 12		U	lingual	Individual tooth samples	0	0															0			0
AG	2	S.v micro-CT	IGD - present	SMB 52B	10	8 to 12		U	internal	Individual tooth samples	0	0															0			1
MM	1	Macro	Inventory	SMB 52B	10	8 to 12	12.5	U	labial/buccal	whole skull	2	2	2		2		2	2	2	1	2	4	2		2		2	2	2	1	2	2	2		1	2		2	2	1	2	2	2		1	2		2	2
MM	1	Macro	Tooth Wear	SMB 52B	10	8 to 12	12.5	U	occlusal	whole skull	2	1	1		1		1	1	1	0	1	0	0		1		1	1	1	0	2	1	1		0	0		1	1	0	2	1	1		1	0		1	1
MM	1	Macro	Dental Trauma	SMB 52B	10	8 to 12	12.5	U	labial/buccal	whole skull	0	0	0		0		0	0	0	N/A	0	N/A	0		0		0	0	0	N/A	0	0	0		N/A	0		0	0	N/A	0	0	0		0	0		0	0
MM	1	Macro	Dental Trauma	SMB 52B	10	8 to 12	12.5	U	lingual	whole skull	0	0	0		0		0	0	0	N/A	0	N/A	0		0		0	0	0	N/A	0	0	0		N/A	0		0	0	N/A	0	0	0		0	0		0	0
MM	1	Macro	Occlusion	SMB 52B	10	8 to 12	12.5	U	occlusal	whole skull
MM	1	Macro	Overbite	SMB 52B	10	8 to 12	12.5	U	labial/buccal	whole skull	3	4	N/A								2	N/A	N/A
MM	1	Macro	Overjet	SMB 52B	10	8 to 12	12.5	U	labial/buccal	whole skull	5	4	N/A								4	N/A	N/A
MM	1	Macro	Caries - present on tooth	SMB 52B	10	8 to 12	12.5	U	All	whole skull	0	0	1		0		0	0	0	N/A	0	N/A	0		0		0	0	0	N/A	0	0	0		N/A	0		0	0	N/A	0	0	0		0	0		0	0
MM	1	Macro	Caries- location 1	SMB 52B	10	8 to 12	12.5	U	mesial	whole skull	0	0	2		0		0	0	0	N/A	0	N/A	0		0		0	0	0	N/A	0	0	0		N/A	0		0	0	N/A	0	0	0		0	0		0	0
MM	1	Macro	Caries- location 2	SMB 52B	10	8 to 12	12.5	U	distal	whole skull	0	0	2		0		0	0	0	N/A	0	N/A	0		0		0	0	0	N/A	0	0	0		N/A	0		0	0	N/A	0	0	0		0	0		0	0
MM	1	Macro	Caries- location 3	SMB 52B	10	8 to 12	12.5	U	occlusal	whole skull	0	0	2		0		0	0	0	N/A	0	N/A	0		0		0	0	0	N/A	0	0	0		N/A	0		0	0	N/A	0	0	0		0	0		0	0
MM	1	Macro	Caries- location 4	SMB 52B	10	8 to 12	12.5	U	labial/buccal	whole skull	0	0	1		0		0	0	0	N/A	0	N/A	0		0		0	0	0	N/A	0	0	0		N/A	0		0	0	N/A	0	0	0		0	0		0	0
MM	1	Macro	Caries- location 5	SMB 52B	10	8 to 12	12.5	U	lingual	whole skull	0	0	2		0		0	0	0	N/A	0	N/A	0		0		0	0	0	N/A	0	0	0		N/A	0		0	0	N/A	0	0	0		0	0		0	0
MM	1	Macro	Caries _ CEJ 1	SMB 52B	10	8 to 12	12.5	U	labial/buccal	whole skull	0	0	1		0		0	0	0	N/A	0	N/A	0		0		0	0	0	N/A	0	0	0		N/A	0		0	0	N/A	0	0	0		0	0		0	0
MM	1	Macro	Caries _ CEJ 2	SMB 52B	10	8 to 12	12.5	U	labial/buccal	whole skull	0	0	2		0		0	0	0	N/A	0	N/A	0		0		0	0	0	N/A	0	0	0		N/A	0		0	0	N/A	0	0	0		0	0		0	0
MM	1	Macro	Caries _ CEJ 3	SMB 52B	10	8 to 12	12.5	U	labial/buccal	whole skull	0	0	0		0		0	0	0	N/A	0	N/A	0		0		0	0	0	N/A	0	0	0		N/A	0		0	0	N/A	0	0	0		0	0		0	0
MM	1	Macro	Caries - Radiolucency	SMB 52B	10	8 to 12	12.5	U	labial/buccal	whole skull
MM	1	Macro	Alveolar status	SMB 52B	10	8 to 12	12.5	U	labial/buccal	whole skull					0		0	0	3	0					0		3	0	0	0					3	3		0	0	0					3	0		0	0
MM	1	Macro	Periodontal disease	SMB 52B	10	8 to 12	12.5	U	labial/buccal	whole skull	2	1	1		0		0	2	0	N/A	1	N/A	4		1		0	1	0	N/A	1	1	1		0	N/A		1	0	N/A	1	1	1		0	N/A		1	0
MM	1	Macro	Periodontal disease	SMB 52B	10	8 to 12	12.5	U	lingual	whole skull	2	0	0		0		0	2	0	N/A	1	N/A	0		0		0	0	0	N/A	1	1	0		0	N/A		2	1	N/A	1	1	0		0	N/A		2	N/A
MM	1	Macro	Enamel hypoplastic defect - present	SMB 52B	10	8 to 12	12.5	U	labial/buccal	whole skull	0	0	0		0		0	0	0	N/A	0	N/A	0		0		0	0	0	N/A	0	0	0		N/A	0		0	0	N/A	0	0	0		0	0		0	0
MM	1	Macro	Enamel hypoplastic defect - present	SMB 52B	10	8 to 12	12.5	U	lingual	whole skull	0	0	0		0		0	0	0	N/A	0	N/A	0		0		0	0	0	N/A	0	0	0		N/A	0		0	0	N/A	0	0	0		0	0		0	0
MM	1	Macro	Enamel hypoplastic defect - type -linear	SMB 52B	10	8 to 12	12.5	U	labial/buccal	whole skull	0	0	0		0		0	0	0	N/A	0	N/A	0		0		0	0	0	N/A	0	0	0		N/A	0		0	0	N/A	0	0	0		0	0		0	0
MM	1	Macro	Enamel hypoplastic defect - type -linear	SMB 52B	10	8 to 12	12.5	U	lingual	whole skull	0	0	0		0		0	0	0	N/A	0	N/A	0		0		0	0	0	N/A	0	0	0		N/A	0		0	0	N/A	0	0	0		0	0		0	0
MM	1	Macro	Enamel hypoplastic defects-number of lines	SMB 52B	10	8 to 12	12.5	U	labial/buccal	whole skull	0	0	0		0		0	0	0	N/A	0	N/A	0		0		0	0	0	N/A	0	0	0		N/A	0		0	0	N/A	0	0	0		0	0		0	0
MM	1	Macro	Enamel hypoplastic defects-number of lines	SMB 52B	10	8 to 12	12.5	U	lingual	whole skull	0	0	0		0		0	0	0	N/A	0	N/A	0		0		0	0	0	N/A	0	0	0		N/A	0		0	0	N/A	0	0	0		0	0		0	0
MM	1	Macro	Enamel hypoplastic defect - type - pits	SMB 52B	10	8 to 12	12.5	U	labial/buccal	whole skull	0	0	0		0		0	0	0	N/A	0	N/A	0		0		0	0	0	N/A	0	0	0		N/A	0		0	0	N/A	0	0	0		0	0		0	0
MM	1	Macro	Enamel hypoplastic defect - type - pits	SMB 52B	10	8 to 12	12.5	U	lingual	whole skull	0	0	0		0		0	0	0	N/A	0	N/A	0		0		0	0	0	N/A	0	0	0		N/A	0		0	0	N/A	0	0	0		0	0		0	0
MM	1	Macro	Enamel hypoplastic defects-number of pits	SMB 52B	10	8 to 12	12.5	U	labial/buccal	whole skull	0	0	0		0		0	0	0	N/A	0	N/A	0		0		0	0	0	N/A	0	0	0		N/A	0		0	0	N/A	0	0	0		0	0		0	0
MM	1	Macro	Enamel hypoplastic defects-number of pits	SMB 52B	10	8 to 12	12.5	U	lingual	whole skull	0	0	0		0		0	0	0	N/A	0	N/A	0		0		0	0	0	N/A	0	0	0		N/A	0		0	0	N/A	0	0	0		0	0		0	0
MM	1	Macro	Enamel hypoplastic defect - measurement 1 (mm)	SMB 52B	10	8 to 12	12.5	U	labial/buccal	whole skull	0	0	0		0		0	0	0	N/A	0	N/A	0		0		0	0	0	N/A	0	0	0		N/A	0		0	0	N/A	0	0	0		0	0		0	0
MM	1	Macro	Enamel hypoplastic defect - measurement 1 (mm)	SMB 52B	10	8 to 12	12.5	U	lingual	whole skull	0	0	0		0		0	0	0	N/A	0	N/A	0		0		0	0	0	N/A	0	0	0		N/A	0		0	0	N/A	0	0	0		0	0		0	0
MM	1	Macro	Enamel hypoplastic defect - measurement 2 (mm)	SMB 52B	10	8 to 12	12.5	U	labial/buccal	whole skull	0	0	0		0		0	0	0	N/A	0	N/A	0		0		0	0	0	N/A	0	0	0		N/A	0		0	0	N/A	0	0	0		0	0		0	0
MM	1	Macro	Enamel hypoplastic defect - measurement 2 (mm)	SMB 52B	10	8 to 12	12.5	U	lingual	whole skull	0	0	0		0		0	0	0	N/A	0	N/A	0		0		0	0	0	N/A	0	0	0		N/A	0		0	0	N/A	0	0	0		0	0		0	0
MM	1	Macro	Enamel hypoplastic defect - measurement 3 (mm)	SMB 52B	10	8 to 12	12.5	U	labial/buccal	whole skull	0	0	0		0		0	0	0	N/A	0	N/A	0		0		0	0	0	N/A	0	0	0		N/A	0		0	0	N/A	0	0	0		0	0		0	0
MM	1	Macro	Enamel hypoplastic defect - measurement 3 (mm)	SMB 52B	10	8 to 12	12.5	U	lingual	whole skull	0	0	0		0		0	0	0	N/A	0	N/A	0		0		0	0	0	N/A	0	0	0		N/A	0		0	0	N/A	0	0	0		0	0		0	0
MM	1	Macro	Enamel hypoplastic defect - measurement 4 (mm)	SMB 52B	10	8 to 12	12.5	U	labial/buccal	whole skull	0	0	0		0		0	0	0	N/A	0	N/A	0		0		0	0	0	N/A	0	0	0		N/A	0		0	0	N/A	0	0	0		0	0		0	0
MM	1	Macro	Enamel hypoplastic defect - measurement 4 (mm)	SMB 52B	10	8 to 12	12.5	U	lingual	whole skull	0	0	0		0		0	0	0	N/A	0	N/A	0		0		0	0	0	N/A	0	0	0		N/A	0		0	0	N/A	0	0	0		0	0		0	0
MM	1	Macro	IGD - present	SMB 52B	10	8 to 12	12.5	U	internal	whole skull
JW	1	Radiographic	Inventory	SMB 52B	10	8 to 12	10 to 11	U	labial/buccal	whole skull	2	2	2		2		2	2	1	1	2	4	2		2		1	2	1	1	2	2	2		1	2		2	2	4	2	2	2		1	2		2	2
JW	1	Radiographic	Tooth Wear	SMB 52B	10	8 to 12	10 to 11	U	occlusal	whole skull	2	2	1		1		1	2	N/A	N/A	2	N/A	1		1		1	2	1	N/A	2	2	1		N/A	2		2	2	N/A	3	2	1		N/A	2		2	1
JW	1	Radiographic	Dental Trauma	SMB 52B	10	8 to 12	10 to 11	U	labial/buccal	whole skull		0	0		0		0	0	0	0	2	N/A	3		0		0	0	0	N/A	3	0	0		N/A	0		0	0	N/A	0	3	0		0	0		0	0
JW	1	Radiographic	Dental Trauma	SMB 52B	10	8 to 12	10 to 11	U	lingual	whole skull
JW	1	Radiographic	Occlusion	SMB 52B	10	8 to 12	10 to 11	U	Occlusal	whole skull
JW	1	Radiographic	Overbite	SMB 52B	10	8 to 12	10 to 11	U	occlusal	whole skull
JW	1	Radiographic	Overjet	SMB 52B	10	8 to 12	10 to 11	U	occlusal	whole skull												N/A
DH	1	Radiographic	Caries - present on tooth	SMB 52B	10	8 to 12	10 to 11	U	All	whole skull	0	0	0		0		0	0	0	N/A	0	N/A	0		0		0	0	0	N/A	0	0	0		N/A	0		0	0	N/A	0	0	0		0	0		0	0
DH	1	Radiographic	Caries- location 1	SMB 52B	10	8 to 12	10 to 11	U	mesial	whole skull	0	0	0		0		0	0	0	N/A	0	N/A	0		0		0	0	0	N/A	0	0	0		N/A	0		0	0	N/A	0	0	0		0	0		0	0
DH	1	Radiographic	Caries- location 2	SMB 52B	10	8 to 12	10 to 11	U	distal	whole skull	0	0	0		0		0	0	0	N/A	0	N/A	0		0		0	0	0	N/A	0	0	0		N/A	0		0	0	N/A	0	0	0		0	0		0	0
DH	1	Radiographic	Caries- location 3	SMB 52B	10	8 to 12	10 to 11	U	occlusal	whole skull	0	0	0		0		0	0	0	N/A	0	N/A	0		0		0	0	0	N/A	0	0	0		N/A	0		0	0	N/A	0	0	0		0	0		0	0
DH	1	Radiographic	Caries- location 4	SMB 52B	10	8 to 12	10 to 11	U	labial/buccal	whole skull	0	0	0		0		0	0	0	N/A	0	N/A	0		0		0	0	0	N/A	0	0	0		N/A	0		0	0	N/A	0	0	0		0	0		0	0
DH	1	Radiographic	Caries- location 5	SMB 52B	10	8 to 12	10 to 11	U	lingual	whole skull	0	0	0		0		0	0	0	N/A	0	N/A	0		0		0	0	0	N/A	0	0	0		N/A	0		0	0	N/A	0	0	0		0	0		0	0
DH	1	Radiographic	Caries _ CEJ 1	SMB 52B	10	8 to 12	10 to 11	U	labial/buccal	whole skull	0	0	0		0		0	0	0	N/A	0	N/A	0		0		0	0	0	N/A	0	0	0		N/A	0		0	0	N/A	0	0	0		0	0		0	0
DH	1	Radiographic	Caries _ CEJ 2	SMB 52B	10	8 to 12	10 to 11	U	labial/buccal	whole skull	0	0	0		0		0	0	0	N/A	0	N/A	0		0		0	0	0	N/A	0	0	0		N/A	0		0	0	N/A	0	0	0		0	0		0	0
DH	1	Radiographic	Caries _ CEJ 3	SMB 52B	10	8 to 12	10 to 11	U	labial/buccal	whole skull	0	0	0		0		0	0	0	N/A	0	N/A	0		0		0	0	0	N/A	0	0	0		N/A	0		0	0	N/A	0	0	0		0	0		0	0
DH	1	Radiographic	Caries - Radiolucency	SMB 52B	10	8 to 12	10 to 11	U	labial/buccal	whole skull	0	0	0		0		0	0	0	N/A	0	N/A	0		0		0	0	0	N/A	0	0	0		N/A	0		0	0	N/A	0	0	0		0	0		0	0
JW	1	Radiographic	Alveolar status	SMB 52B	10	8 to 12	10 to 11	U	labial/buccal	whole skull
JW	1	Radiographic	Periodontal disease	SMB 52B	10	8 to 12	10 to 11	U	labial/buccal	whole skull
JW	1	Radiographic	Periodontal disease	SMB 52B	10	8 to 12	10 to 11	U	lingual	whole skull
JW	1	Radiographic	Enamel hypoplastic defect - present	SMB 52B	10	8 to 12	10 to 11	U	labial/buccal	whole skull
JW	1	Radiographic	Enamel hypoplastic defect - present	SMB 52B	10	8 to 12	10 to 11	U	lingual	whole skull
JW	1	Radiographic	Enamel hypoplastic defect - type -linear	SMB 52B	10	8 to 12	10 to 11	U	labial/buccal	whole skull
JW	1	Radiographic	Enamel hypoplastic defect - type -linear	SMB 52B	10	8 to 12	10 to 11	U	lingual	whole skull
JW	1	Radiographic	Enamel hypoplastic defects-number of lines	SMB 52B	10	8 to 12	10 to 11	U	labial/buccal	whole skull
JW	1	Radiographic	Enamel hypoplastic defects-number of lines	SMB 52B	10	8 to 12	10 to 11	U	lingual	whole skull
JW	1	Radiographic	Enamel hypoplastic defect - type - pits	SMB 52B	10	8 to 12	10 to 11	U	labial/buccal	whole skull
JW	1	Radiographic	Enamel hypoplastic defect - type - pits	SMB 52B	10	8 to 12	10 to 11	U	lingual	whole skull
JW	1	Radiographic	Enamel hypoplastic defects-number of pits	SMB 52B	10	8 to 12	10 to 11	U	labial/buccal	whole skull
JW	1	Radiographic	Enamel hypoplastic defects-number of pits	SMB 52B	10	8 to 12	10 to 11	U	lingual	whole skull
JW	1	Radiographic	Enamel hypoplastic defect - measurement 1 (mm)	SMB 52B	10	8 to 12	10 to 11	U	labial/buccal	whole skull
JW	1	Radiographic	Enamel hypoplastic defect - measurement 1 (mm)	SMB 52B	10	8 to 12	10 to 11	U	lingual	whole skull
JW	1	Radiographic	Enamel hypoplastic defect - measurement 2 (mm)	SMB 52B	10	8 to 12	10 to 11	U	labial/buccal	whole skull
JW	1	Radiographic	Enamel hypoplastic defect - measurement 2 (mm)	SMB 52B	10	8 to 12	10 to 11	U	lingual	whole skull
JW	1	Radiographic	Enamel hypoplastic defect - measurement 3 (mm)	SMB 52B	10	8 to 12	10 to 11	U	labial/buccal	whole skull
JW	1	Radiographic	Enamel hypoplastic defect - measurement 3 (mm)	SMB 52B	10	8 to 12	10 to 11	U	lingual	whole skull
JW	1	Radiographic	Enamel hypoplastic defect - measurement 4 (mm)	SMB 52B	10	8 to 12	10 to 11	U	labial/buccal	whole skull
JW	1	Radiographic	Enamel hypoplastic defect - measurement 4 (mm)	SMB 52B	10	8 to 12	10 to 11	U	lingual	whole skull
JW	1	Radiographic	IGD - present	SMB 52B	10	8 to 12	10 to 11	U	internal	whole skull
MM	1	L.v micro-CT	Inventory	SMB 52B	10	8 to 12	11.5 to 12.5	U	labial/buccal	whole skull	2	2	2		2		2	2	2	1	2	4	2		2		2	2	2	1	2	2	2		2	1		2	2	N/A	2	2	2		1	2		2	2
MM	1	L.v micro-CT	Tooth Wear	SMB 52B	10	8 to 12	11.5 to 12.5	U	occlusal	whole skull	1	1	1	1	1	1	1	0	1	N/A	1	N/A	1		1		1	1	1	0	2	1	1		0	0		2	1	1	2	1	1		1	0		2	1
MM	1	L.v micro-CT	Dental Trauma	SMB 52B	10	8 to 12	11.5 to 12.5	U	labial/buccal	whole skull	0	0	0		0		0	0	0	N/A	0	0	0		0		0	0	0	N/A	0	0	0		N/A	0		0	0	N/A	0	0	0		0	0		0	0
MM	1	L.v micro-CT	Dental Trauma	SMB 52B	10	8 to 12	11.5 to 12.5	U	lingual	whole skull	0	0	0		0		0	0	0	N/A	0	0	0		0		0	0	0	N/A	0	0	0		N/A	0		0	0	N/A	0	0	0		0	0		0	0
MM	1	L.v micro-CT	Occlusion	SMB 52B	10	8 to 12	11.5 to 12.5	U	occlusal	whole skull
MM	1	L.v micro-CT	Overbite	SMB 52B	10	8 to 12	11.5 to 12.5	U	occlusal	whole skull	N/A	N/A	N/A								0.77	N/A	N/A
MM	1	L.v micro-CT	Overjet	SMB 52B	10	8 to 12	11.5 to 12.5	U	occlusal	whole skull	N/A	N/A	N/A								1.1	N/A	N/A
MM	1	L.v micro-CT	Caries - present on tooth	SMB 52B	10	8 to 12	11.5 to 12.5	U	All	whole skull	0	0	0		0		0	0	0	N/A	0	N/A	0		0		0	0	0	N/A	0	0	0		N/A	0		0	0	N/A	0	0	0		0	0		0	0
MM	1	L.v micro-CT	Caries- location 1	SMB 52B	10	8 to 12	11.5 to 12.5	U	mesial	whole skull	0	0	0		0		0	0	0	N/A	0	N/A	0		0		0	0	0	N/A	0	0	0		N/A	0		0	0	N/A	0	0	0		0	0		0	0
MM	1	L.v micro-CT	Caries- location 2	SMB 52B	10	8 to 12	11.5 to 12.5	U	distal	whole skull	0	0	0		0		0	0	0	N/A	0	N/A	0		0		0	0	0	N/A	0	0	0		N/A	0		0	0	N/A	0	0	0		0	0		0	0
MM	1	L.v micro-CT	Caries- location 3	SMB 52B	10	8 to 12	11.5 to 12.5	U	occlusal	whole skull	0	0	0		0		0	0	0	N/A	0	N/A	0		0		0	0	0	N/A	0	0	0		N/A	0		0	0	N/A	0	0	0		0	0		0	0
MM	1	L.v micro-CT	Caries- location 4	SMB 52B	10	8 to 12	11.5 to 12.5	U	labial/buccal	whole skull	0	0	0		0		0	0	0	N/A	0	N/A	0		0		0	0	0	N/A	0	0	0		N/A	0		0	0	N/A	0	0	0		0	0		0	0
MM	1	L.v micro-CT	Caries- location 5	SMB 52B	10	8 to 12	11.5 to 12.5	U	lingual	whole skull	0	0	0		0		0	0	0	N/A	0	N/A	0		0		0	0	0	N/A	0	0	0		N/A	0		0	0	N/A	0	0	0		0	0		0	0
MM	1	L.v micro-CT	Caries _ CEJ 1	SMB 52B	10	8 to 12	11.5 to 12.5	U	labial/buccal	whole skull	0	0	0		0		0	0	0	N/A	0	N/A	0		0		0	0	0	N/A	0	0	0		N/A	0		0	0	N/A	0	0	0		0	0		0	0
MM	1	L.v micro-CT	Caries _ CEJ 2	SMB 52B	10	8 to 12	11.5 to 12.5	U	labial/buccal	whole skull	0	0	0		0		0	0	0	N/A	0	N/A	0		0		0	0	0	N/A	0	0	0		N/A	0		0	0	N/A	0	0	0		0	0		0	0
MM	1	L.v micro-CT	Caries _ CEJ 3	SMB 52B	10	8 to 12	11.5 to 12.5	U	labial/buccal	whole skull	0	0	0		0		0	0	0	N/A	0	N/A	0		0		0	0	0	N/A	0	0	0		N/A	0		0	0	N/A	0	0	0		0	0		0	0
MM	1	L.v micro-CT	Caries - Radiolucency	SMB 52B	10	8 to 12	11.5 to 12.5	U	labial/buccal	whole skull	0	0	0		0		0	0	0	N/A	0	N/A	0		0		0	0	0	N/A	0	0	0		N/A	0		0	0	N/A	0	0	0		0	0		0	0
MM	1	L.v micro-CT	Alveolar status	SMB 52B	10	8 to 12	11.5 to 12.5	U	labial/buccal	whole skull					0		0	3	0	0					0		3	0	0	2					3	3		0	0	0					3	0		0	0
MM	1	L.v micro-CT	Periodontal disease	SMB 52B	10	8 to 12	11.5 to 12.5	U	labial/buccal	whole skull	1.9	1.52	1.5		1.88		0	0	N/A	N/A	2.08	N/A	0		0		0	0	0	N/A	1.22	1.77	0		N/A	1.76		0	0	N/A	1.11	2.08	1.28		N/A	1.35		0	0
MM	1	L.v micro-CT	Periodontal disease	SMB 52B	10	8 to 12	11.5 to 12.5	U	lingual	whole skull	0.84	0	0		0		0	0	N/A	N/A	0.48	N/A	0		0		0	0	0	N/A	0	0	0		N/A	1.33		1.97	0	N/A	1.2	1.43	0		N/A	1.26		N/A	0
MM	1	L.v micro-CT	Enamel hypoplastic defect - present	SMB 52B	10	8 to 12	11.5 to 12.5	U	labial/buccal	whole skull	0	0	0		0		0	0	0	N/A	0	N/A	0		0		0	0	0	N/A	0	0	0		N/A	0		0	0	N/A	0	0	0		N/A	0		0	0
MM	1	L.v micro-CT	Enamel hypoplastic defect - present	SMB 52B	10	8 to 12	11.5 to 12.5	U	lingual	whole skull	0	0	0		0		0	0	0	N/A	0	N/A	0		0		0	0	0	N/A	0	0	0		N/A	0		0	0	N/A	0	0	0		N/A	0		N/A	0
MM	1	L.v micro-CT	Enamel hypoplastic defect - type -linear	SMB 52B	10	8 to 12	11.5 to 12.5	U	labial/buccal	whole skull	0	0	0		0		0	0	0	N/A	0	N/A	0		0		0	0	0	N/A	0	0	0		N/A	0		0	0	N/A	0	0	0		N/A	0		0	0
MM	1	L.v micro-CT	Enamel hypoplastic defect - type -linear	SMB 52B	10	8 to 12	11.5 to 12.5	U	lingual	whole skull	0	0	0		0		0	0	0	N/A	0	N/A	0		0		0	0	0	N/A	0	0	0		N/A	0		0	0	N/A	0	0	0		N/A	0		N/A	0
MM	1	L.v micro-CT	Enamel hypoplastic defects-number of lines	SMB 52B	10	8 to 12	11.5 to 12.5	U	labial/buccal	whole skull	0	0	0		0		0	0	0	N/A	0	N/A	0		0		0	0	0	N/A	0	0	0		N/A	0		0	0	N/A	0	0	0		N/A	0		0	0
MM	1	L.v micro-CT	Enamel hypoplastic defects-number of lines	SMB 52B	10	8 to 12	11.5 to 12.5	U	lingual	whole skull	0	0	0		0		0	0	0	N/A	0	N/A	0		0		0	0	0	N/A	0	0	0		N/A	0		0	0	N/A	0	0	0		N/A	0		N/A	0
MM	1	L.v micro-CT	Enamel hypoplastic defect - type - pits	SMB 52B	10	8 to 12	11.5 to 12.5	U	labial/buccal	whole skull	0	0	0		0		0	0	0	N/A	0	N/A	0		0		0	0	0	N/A	0	0	0		N/A	0		0	0	N/A	0	0	0		N/A	0		0	0
MM	1	L.v micro-CT	Enamel hypoplastic defect - type - pits	SMB 52B	10	8 to 12	11.5 to 12.5	U	lingual	whole skull	0	0	0		0		0	0	0	N/A	0	N/A	0		0		0	0	0	N/A	0	0	0		N/A	0		0	0	N/A	0	0	0		N/A	0		N/A	0
MM	1	L.v micro-CT	Enamel hypoplastic defects-number of pits	SMB 52B	10	8 to 12	11.5 to 12.5	U	labial/buccal	whole skull	0	0	0		0		0	0	0	N/A	0	N/A	0		0		0	0	0	N/A	0	0	0		N/A	0		0	0	N/A	0	0	0		N/A	0		0	0
MM	1	L.v micro-CT	Enamel hypoplastic defects-number of pits	SMB 52B	10	8 to 12	11.5 to 12.5	U	lingual	whole skull	0	0	0		0		0	0	0	N/A	0	N/A	0		0		0	0	0	N/A	0	0	0		N/A	0		0	0	N/A	0	0	0		N/A	0		N/A	0
MM	1	L.v micro-CT	Enamel hypoplastic defect - measurement 1 (mm)	SMB 52B	10	8 to 12	11.5 to 12.5	U	labial/buccal	whole skull	0	0	0		0		0	0	0	N/A	0	N/A	0		0		0	0	0	N/A	0	0	0		N/A	0		0	0	N/A	0	0	0		N/A	0		0	0
MM	1	L.v micro-CT	Enamel hypoplastic defect - measurement 1 (mm)	SMB 52B	10	8 to 12	11.5 to 12.5	U	lingual	whole skull	0	0	0		0		0	0	0	N/A	0	N/A	0		0		0	0	0	N/A	0	0	0		N/A	0		0	0	N/A	0	0	0		N/A	0		N/A	0
MM	1	L.v micro-CT	Enamel hypoplastic defect - measurement 2 (mm)	SMB 52B	10	8 to 12	11.5 to 12.5	U	labial/buccal	whole skull	0	0	0		0		0	0	0	N/A	0	N/A	0		0		0	0	0	N/A	0	0	0		N/A	0		0	0	N/A	0	0	0		N/A	0		0	0
MM	1	L.v micro-CT	Enamel hypoplastic defect - measurement 2 (mm)	SMB 52B	10	8 to 12	11.5 to 12.5	U	lingual	whole skull	0	0	0		0		0	0	0	N/A	0	N/A	0		0		0	0	0	N/A	0	0	0		N/A	0		0	0	N/A	0	0	0		N/A	0		N/A	0
MM	1	L.v micro-CT	Enamel hypoplastic defect - measurement 3 (mm)	SMB 52B	10	8 to 12	11.5 to 12.5	U	labial/buccal	whole skull	0	0	0		0		0	0	0	N/A	0	N/A	0		0		0	0	0	N/A	0	0	0		N/A	0		0	0	N/A	0	0	0		N/A	0		0	0
MM	1	L.v micro-CT	Enamel hypoplastic defect - measurement 3 (mm)	SMB 52B	10	8 to 12	11.5 to 12.5	U	lingual	whole skull	0	0	0		0		0	0	0	N/A	0	N/A	0		0		0	0	0	N/A	0	0	0		N/A	0		0	0	N/A	0	0	0		N/A	0		N/A	0
MM	1	L.v micro-CT	Enamel hypoplastic defect - measurement 4 (mm)	SMB 52B	10	8 to 12	11.5 to 12.5	U	labial/buccal	whole skull	0	0	0		0		0	0	0	N/A	0	N/A	0		0		0	0	0	N/A	0	0	0		N/A	0		0	0	N/A	0	0	0		N/A	0		0	0
MM	1	L.v micro-CT	Enamel hypoplastic defect - measurement 4 (mm)	SMB 52B	10	8 to 12	11.5 to 12.5	U	lingual	whole skull	0	0	0		0		0	0	0	N/A	0	N/A	0		0		0	0	0	N/A	0	0	0		N/A	0		0	0	N/A	0	0	0		N/A	0		N/A	0
MM	1	L.v micro-CT	IGD - present	SMB 52B	10	8 to 12	11.5 to 12.5	U	internal	whole skull	0	0	0		0		0	0	0	N/A	0	N/A	0		0		0	0	0	N/A	0	0	0		N/A	0		0	0	N/A	0	0	0		N/A	0		0	0
MM	1	S.v micro-CT	Inventory	SMB 52B	10	8 to 12		U	labial/buccal	Individual tooth samples
MM	1	S.v micro-CT	Tooth Wear	SMB 52B	10	8 to 12		U	occlusal	Individual tooth samples	2	0
MM	1	S.v micro-CT	Dental Trauma	SMB 52B	10	8 to 12		U	labial/buccal	Individual tooth samples	0	0
MM	1	S.v micro-CT	Dental Trauma	SMB 52B	10	8 to 12		U	lingual	Individual tooth samples	0	0
MM	1	S.v micro-CT	Occlusion	SMB 52B	10	8 to 12		U	occlusal	Individual tooth samples
MM	1	S.v micro-CT	Overbite	SMB 52B	10	8 to 12		U	occlusal	Individual tooth samples
MM	1	S.v micro-CT	Overjet	SMB 52B	10	8 to 12		U	occlusal	Individual tooth samples
MM	1	S.v micro-CT	Caries - present on tooth	SMB 52B	10	8 to 12		U	All	Individual tooth samples	0	0
MM	1	S.v micro-CT	Caries- location 1	SMB 52B	10	8 to 12		U	mesial	Individual tooth samples	0	0															1			1
MM	1	S.v micro-CT	Caries- location 2	SMB 52B	10	8 to 12		U	distal	Individual tooth samples	0	0															1			2
MM	1	S.v micro-CT	Caries- location 3	SMB 52B	10	8 to 12		U	occlusal	Individual tooth samples	0	0															2			2
MM	1	S.v micro-CT	Caries- location 4	SMB 52B	10	8 to 12		U	labial/buccal	Individual tooth samples	0	0															2			2
MM	1	S.v micro-CT	Caries- location 5	SMB 52B	10	8 to 12		U	lingual	Individual tooth samples	0	0															2			2
MM	1	S.v micro-CT	Caries _ CEJ 1	SMB 52B	10	8 to 12		U	labial/buccal	Individual tooth samples	0	0															0			0
MM	1	S.v micro-CT	Caries _ CEJ 2	SMB 52B	10	8 to 12		U	labial/buccal	Individual tooth samples	0	0															0			0
MM	1	S.v micro-CT	Caries _ CEJ 3	SMB 52B	10	8 to 12		U	labial/buccal	Individual tooth samples	0	0															0			0
MM	1	S.v micro-CT	Caries - Radiolucency	SMB 52B	10	8 to 12		U	labial/buccal	Individual tooth samples	0	0															0			0
MM	1	S.v micro-CT	Alveolar status	SMB 52B	10	8 to 12		U	labial/buccal	Individual tooth samples
MM	1	S.v micro-CT	Periodontal disease	SMB 52B	10	8 to 12		U	labial/buccal	Individual tooth samples
MM	1	S.v micro-CT	Periodontal disease	SMB 52B	10	8 to 12		U	labial/buccal	Individual tooth samples
MM	1	S.v micro-CT	Enamel hypoplastic defect - present	SMB 52B	10	8 to 12		U	labial/buccal	Individual tooth samples	0	0															1			1
MM	1	S.v micro-CT	Enamel hypoplastic defect - present	SMB 52B	10	8 to 12		U	lingual	Individual tooth samples	0	0															0			1
MM	1	S.v micro-CT	Enamel hypoplastic defect - type -linear	SMB 52B	10	8 to 12		U	labial/buccal	Individual tooth samples	0	0															1			1
MM	1	S.v micro-CT	Enamel hypoplastic defect - type -linear	SMB 52B	10	8 to 12		U	lingual	Individual tooth samples	0	0															0			1
MM	1	S.v micro-CT	Enamel hypoplastic defects-number of lines	SMB 52B	10	8 to 12		U	labial/buccal	Individual tooth samples	0	0															2			1
MM	1	S.v micro-CT	Enamel hypoplastic defects-number of lines	SMB 52B	10	8 to 12		U	lingual	Individual tooth samples	0	0															0			1
MM	1	S.v micro-CT	Enamel hypoplastic defect - type - pits	SMB 52B	10	8 to 12		U	labial/buccal	Individual tooth samples	0	0															1			2
MM	1	S.v micro-CT	Enamel hypoplastic defect - type - pits	SMB 52B	10	8 to 12		U	lingual	Individual tooth samples	0	0															0			2
MM	1	S.v micro-CT	Enamel hypoplastic defects-number of pits	SMB 52B	10	8 to 12		U	labial/buccal	Individual tooth samples	0	0															2			0
MM	1	S.v micro-CT	Enamel hypoplastic defects-number of pits	SMB 52B	10	8 to 12		U	lingual	Individual tooth samples	0	0															0			0
MM	1	S.v micro-CT	Enamel hypoplastic defect - measurement 1 (mm)	SMB 52B	10	8 to 12		U	labial/buccal	Individual tooth samples	0	0															1.11			2.08
MM	1	S.v micro-CT	Enamel hypoplastic defect - measurement 1 (mm)	SMB 52B	10	8 to 12		U	lingual	Individual tooth samples	0	0															0			1.53
MM	1	S.v micro-CT	Enamel hypoplastic defect - measurement 2 (mm)	SMB 52B	10	8 to 12		U	labial/buccal	Individual tooth samples	0	0															1.92			0
MM	1	S.v micro-CT	Enamel hypoplastic defect - measurement 2 (mm)	SMB 52B	10	8 to 12		U	lingual	Individual tooth samples	0	0															0			0
MM	1	S.v micro-CT	Enamel hypoplastic defect - measurement 3 (mm)	SMB 52B	10	8 to 12		U	labial/buccal	Individual tooth samples	0	0															3.62			0
MM	1	S.v micro-CT	Enamel hypoplastic defect - measurement 3 (mm)	SMB 52B	10	8 to 12		U	lingual	Individual tooth samples	0	0															0			0
MM	1	S.v micro-CT	Enamel hypoplastic defect - measurement 4 (mm)	SMB 52B	10	8 to 12		U	labial/buccal	Individual tooth samples	0	0															0			0
MM	1	S.v micro-CT	Enamel hypoplastic defect - measurement 4 (mm)	SMB 52B	10	8 to 12		U	lingual	Individual tooth samples	0	0															0			0
MM	1	S.v micro-CT	IGD - present	SMB 52B	10	8 to 12		U	internal	Individual tooth samples	0	0															0			1
AG	1	Macro	Inventory	SMB 4A	4	2 to 6	3.5 to 4.5	U	labial/buccal	whole skull	2	2	2	2		2		1			2	2	2	2		4		1			2	2	2	2		2		1	1		2	2	2	2		2		1	1
AG	1	Macro	Tooth Wear	SMB 4A	4	2 to 6	3.5 to 4.5	U	occlusal	whole skull	2	2	1	1		1		0			3	3	3	2		2		0			3	3	3	2		2		0	0		3	3	2	2		2		0	0
AG	1	Macro	Dental Trauma	SMB 4A	4	2 to 6	3.5 to 4.5	U	labial/buccal	whole skull	0	0	0	0		0		0			0	0	0	0		0		0			0	0	0	0		0		0	0		0	0	0	0		0		0	0
AG	1	Macro	Dental Trauma	SMB 4A	4	2 to 6	3.5 to 4.5	U	lingual	whole skull	0	0	0	0		0		0			0	0	0	0		0		0			0	0	0	0		0		0	0		0	0	0	0		0		0	0
AG	1	Macro	Occlusion	SMB 4A	4	2 to 6	3.5 to 4.5	U	occlusal	whole skull
AG	1	Macro	Overbite	SMB 4A	4	2 to 6	3.5 to 4.5	U	labial/buccal	whole skull
AG	1	Macro	Overjet	SMB 4A	4	2 to 6	3.5 to 4.5	U	labial/buccal	whole skull
AG	1	Macro	Caries - present on tooth	SMB 4A	4	2 to 6	3.5 to 4.5	U	All	whole skull	0	0	0	0		0		0			0	0	0	0		0		0			0	0	0	0		0		0	0		0	0	0	0		0		0	0
AG	1	Macro	Caries- location 1	SMB 4A	4	2 to 6	3.5 to 4.5	U	mesial	whole skull	0	0	0	0		0		0			0	0	0	0		0		0			0	0	0	0		0		0	0		0	0	0	0		0		0	0
AG	1	Macro	Caries- location 2	SMB 4A	4	2 to 6	3.5 to 4.5	U	distal	whole skull	0	0	0	0		0		0			0	0	0	0		0		0			0	0	0	0		0		0	0		0	0	0	0		0		0	0
AG	1	Macro	Caries- location 3	SMB 4A	4	2 to 6	3.5 to 4.5	U	occlusal	whole skull	0	0	0	0		0		0			0	0	0	0		0		0			0	0	0	0		0		0	0		0	0	0	0		0		0	0
AG	1	Macro	Caries- location 4	SMB 4A	4	2 to 6	3.5 to 4.5	U	labial/buccal	whole skull	0	0	0	0		0		0			0	0	0	0		0		0			0	0	0	0		0		0	0		0	0	0	0		0		0	0
AG	1	Macro	Caries- location 5	SMB 4A	4	2 to 6	3.5 to 4.5	U	lingual	whole skull	0	0	0	0		0		0			0	0	0	0		0		0			0	0	0	0		0		0	0		0	0	0	0		0		0	0
AG	1	Macro	Caries _ CEJ 1	SMB 4A	4	2 to 6	3.5 to 4.5	U	labial/buccal	whole skull	0	0	0	0		0		0			0	0	0	0		0		0			0	0	0	0		0		0	0		0	0	0	0		0		0	0
AG	1	Macro	Caries _ CEJ 2	SMB 4A	4	2 to 6	3.5 to 4.5	U	labial/buccal	whole skull	0	0	0	0		0		0			0	0	0	0		0		0			0	0	0	0		0		0	0		0	0	0	0		0		0	0
AG	1	Macro	Caries _ CEJ 3	SMB 4A	4	2 to 6	3.5 to 4.5	U	labial/buccal	whole skull	0	0	0	0		0		0			0	0	0	0		0		0			0	0	0	0		0		0	0		0	0	0	0		0		0	0
AG	1	Macro	Caries - Radiolucency	SMB 4A	4	2 to 6	3.5 to 4.5	U	labial/buccal	whole skull
AG	1	Macro	Alveolar status	SMB 4A	4	2 to 6	3.5 to 4.5	U	labial/buccal	whole skull				1		1								1		0								1		1								1		1
AG	1	Macro	Periodontal disease	SMB 4A	4	2 to 6	3.5 to 4.5	U	labial/buccal	whole skull	2	2	2	1		1					2	1.5	1	1		N/A					2	2	1	1		1					3	2	1	0		N/A
AG	1	Macro	Periodontal disease	SMB 4A	4	2 to 6	3.5 to 4.5	U	lingual	whole skull	1	1	1	0		0					1	1	0	0		N/A					1	1	0	0		0					1	1	0	0		N/A
AG	1	Macro	Enamel hypoplastic defect - present	SMB 4A	4	2 to 6	3.5 to 4.5	U	labial/buccal	whole skull	0	0	0	0		0					0	0	0	0		0					0	0	0	0		0					0	0	0	0		0
AG	1	Macro	Enamel hypoplastic defect - present	SMB 4A	4	2 to 6	3.5 to 4.5	U	lingual	whole skull	0	0	0	0		0					0	0	0	0		0					0	0	0	0		0					0	0	0	0		0
AG	1	Macro	Enamel hypoplastic defect - type -linear	SMB 4A	4	2 to 6	3.5 to 4.5	U	labial/buccal	whole skull	0	0	0	0		0					0	0	0	0		0					0	0	0	0		0					0	0	0	0		0
AG	1	Macro	Enamel hypoplastic defect - type -linear	SMB 4A	4	2 to 6	3.5 to 4.5	U	lingual	whole skull	0	0	0	0		0					0	0	0	0		0					0	0	0	0		0					0	0	0	0		0
AG	1	Macro	Enamel hypoplastic defects-number of lines	SMB 4A	4	2 to 6	3.5 to 4.5	U	labial/buccal	whole skull	0	0	0	0		0					0	0	0	0		0					0	0	0	0		0					0	0	0	0		0
AG	1	Macro	Enamel hypoplastic defects-number of lines	SMB 4A	4	2 to 6	3.5 to 4.5	U	lingual	whole skull	0	0	0	0		0					0	0	0	0		0					0	0	0	0		0					0	0	0	0		0
AG	1	Macro	Enamel hypoplastic defect - type - pits	SMB 4A	4	2 to 6	3.5 to 4.5	U	labial/buccal	whole skull	0	0	0	0		0					0	0	0	0		0					0	0	0	0		0					0	0	0	0		0
AG	1	Macro	Enamel hypoplastic defect - type - pits	SMB 4A	4	2 to 6	3.5 to 4.5	U	lingual	whole skull	0	0	0	0		0					0	0	0	0		0					0	0	0	0		0					0	0	0	0		0
AG	1	Macro	Enamel hypoplastic defects-number of pits	SMB 4A	4	2 to 6	3.5 to 4.5	U	labial/buccal	whole skull	0	0	0	0		0					0	0	0	0		0					0	0	0	0		0					0	0	0	0		0
AG	1	Macro	Enamel hypoplastic defects-number of pits	SMB 4A	4	2 to 6	3.5 to 4.5	U	lingual	whole skull	0	0	0	0		0					0	0	0	0		0					0	0	0	0		0					0	0	0	0		0
AG	1	Macro	Enamel hypoplastic defect - measurement 1 (mm)	SMB 4A	4	2 to 6	3.5 to 4.5	U	labial/buccal	whole skull	0	0	0	0		0					0	0	0	0		0					0	0	0	0		0					0	0	0	0		0
AG	1	Macro	Enamel hypoplastic defect - measurement 1 (mm)	SMB 4A	4	2 to 6	3.5 to 4.5	U	lingual	whole skull	0	0	0	0		0					0	0	0	0		0					0	0	0	0		0					0	0	0	0		0
AG	1	Macro	Enamel hypoplastic defect - measurement 2 (mm)	SMB 4A	4	2 to 6	3.5 to 4.5	U	labial/buccal	whole skull	0	0	0	0		0					0	0	0	0		0					0	0	0	0		0					0	0	0	0		0
AG	1	Macro	Enamel hypoplastic defect - measurement 2 (mm)	SMB 4A	4	2 to 6	3.5 to 4.5	U	lingual	whole skull	0	0	0	0		0					0	0	0	0		0					0	0	0	0		0					0	0	0	0		0
AG	1	Macro	Enamel hypoplastic defect - measurement 3 (mm)	SMB 4A	4	2 to 6	3.5 to 4.5	U	labial/buccal	whole skull	0	0	0	0		0					0	0	0	0		0					0	0	0	0		0					0	0	0	0		0
AG	1	Macro	Enamel hypoplastic defect - measurement 3 (mm)	SMB 4A	4	2 to 6	3.5 to 4.5	U	lingual	whole skull	0	0	0	0		0					0	0	0	0		0					0	0	0	0		0					0	0	0	0		0
AG	1	Macro	Enamel hypoplastic defect - measurement 4 (mm)	SMB 4A	4	2 to 6	3.5 to 4.5	U	labial/buccal	whole skull	0	0	0	0		0					0	0	0	0		0					0	0	0	0		0					0	0	0	0		0
AG	1	Macro	Enamel hypoplastic defect - measurement 4 (mm)	SMB 4A	4	2 to 6	3.5 to 4.5	U	lingual	whole skull	0	0	0	0		0					0	0	0	0		0					0	0	0	0		0					0	0	0	0		0
AG	1	Macro	IGD - present	SMB 4A	4	2 to 6	3.5 to 4.5	U	internal	whole skull
AG	1	Radiographic	Inventory	SMB 4A	4	2 to 6	3.5 to 4.5	U	labial/buccal	whole skull	2	2	2	2		2		1			2	2	2	2		4		4			2	2	2	2		2		1			2	2	2	2		2		1
AG	1	Radiographic	Tooth Wear	SMB 4A	4	2 to 6	3.5 to 4.5	U	occlusal	whole skull	2	2	2	2		2					2	2	2	2		N/A					2	2	2	2		2					2	2	2	2		2
AG	1	Radiographic	Dental Trauma	SMB 4A	4	2 to 6	3.5 to 4.5	U	labial/buccal	whole skull	0	0	0	0		0					0	0	0	0		0					0	0	0	0		0					0	0	0	0		0
AG	1	Radiographic	Dental Trauma	SMB 4A	4	2 to 6	3.5 to 4.5	U	lingual	whole skull	0	0	0	0		0					0	0	0	0		0					0	0	0	0		0					0	0	0	0		0
AG	1	Radiographic	Occlusion	SMB 4A	4	2 to 6	3.5 to 4.5	U	Occlusal	whole skull
AG	1	Radiographic	Overbite	SMB 4A	4	2 to 6	3.5 to 4.5	U	occlusal	whole skull
AG	1	Radiographic	Overjet	SMB 4A	4	2 to 6	3.5 to 4.5	U	occlusal	whole skull
AG	1	Radiographic	Caries - present on tooth	SMB 4A	4	2 to 6	3.5 to 4.5	U	All	whole skull	0	0	0	0		0					0	0	0	0		N/A					0	0	0	0		0					0	0	0	0		0
AG	1	Radiographic	Caries- location 1	SMB 4A	4	2 to 6	3.5 to 4.5	U	mesial	whole skull	0	0	0	0		0					0	0	0	0		N/A					0	0	0	0		0					0	0	0	0		0
AG	1	Radiographic	Caries- location 2	SMB 4A	4	2 to 6	3.5 to 4.5	U	distal	whole skull	0	0	0	0		0					0	0	0	0		N/A					0	0	0	0		0					0	0	0	0		0
AG	1	Radiographic	Caries- location 3	SMB 4A	4	2 to 6	3.5 to 4.5	U	occlusal	whole skull	0	0	0	0		0					0	0	0	0		N/A					0	0	0	0		0					0	0	0	0		0
AG	1	Radiographic	Caries- location 4	SMB 4A	4	2 to 6	3.5 to 4.5	U	labial/buccal	whole skull	0	0	0	0		0					0	0	0	0		N/A					0	0	0	0		0					0	0	0	0		0
AG	1	Radiographic	Caries- location 5	SMB 4A	4	2 to 6	3.5 to 4.5	U	lingual	whole skull	0	0	0	0		0					0	0	0	0		N/A					0	0	0	0		0					0	0	0	0		0
AG	1	Radiographic	Caries _ CEJ 1	SMB 4A	4	2 to 6	3.5 to 4.5	U	labial/buccal	whole skull	0	0	0	0		0					0	0	0	0		N/A					0	0	0	0		0					0	0	0	0		0
AG	1	Radiographic	Caries _ CEJ 2	SMB 4A	4	2 to 6	3.5 to 4.5	U	labial/buccal	whole skull	0	0	0	0		0					0	0	0	0		N/A					0	0	0	0		0					0	0	0	0		0
AG	1	Radiographic	Caries _ CEJ 3	SMB 4A	4	2 to 6	3.5 to 4.5	U	labial/buccal	whole skull	0	0	0	0		0					0	0	0	0		N/A					0	0	0	0		0					0	0	0	0		0
AG	1	Radiographic	Caries - Radiolucency	SMB 4A	4	2 to 6	3.5 to 4.5	U	labial/buccal	whole skull	0	0	0	0		0					0	0	0	0		N/A					0	0	0	0		0					0	0	0	0		0
AG	1	Radiographic	Alveolar status	SMB 4A	4	2 to 6	3.5 to 4.5	U	labial/buccal	whole skull
AG	1	Radiographic	Periodontal disease	SMB 4A	4	2 to 6	3.5 to 4.5	U	labial/buccal	whole skull
AG	1	Radiographic	Periodontal disease	SMB 4A	4	2 to 6	3.5 to 4.5	U	lingual	whole skull
AG	1	Radiographic	Enamel hypoplastic defect - present	SMB 4A	4	2 to 6	3.5 to 4.5	U	labial/buccal	whole skull
AG	1	Radiographic	Enamel hypoplastic defect - present	SMB 4A	4	2 to 6	3.5 to 4.5	U	lingual	whole skull
AG	1	Radiographic	Enamel hypoplastic defect - type -linear	SMB 4A	4	2 to 6	3.5 to 4.5	U	labial/buccal	whole skull
AG	1	Radiographic	Enamel hypoplastic defect - type -linear	SMB 4A	4	2 to 6	3.5 to 4.5	U	lingual	whole skull
AG	1	Radiographic	Enamel hypoplastic defects-number of lines	SMB 4A	4	2 to 6	3.5 to 4.5	U	labial/buccal	whole skull
AG	1	Radiographic	Enamel hypoplastic defects-number of lines	SMB 4A	4	2 to 6	3.5 to 4.5	U	lingual	whole skull
AG	1	Radiographic	Enamel hypoplastic defect - type - pits	SMB 4A	4	2 to 6	3.5 to 4.5	U	labial/buccal	whole skull
AG	1	Radiographic	Enamel hypoplastic defect - type - pits	SMB 4A	4	2 to 6	3.5 to 4.5	U	lingual	whole skull
AG	1	Radiographic	Enamel hypoplastic defects-number of pits	SMB 4A	4	2 to 6	3.5 to 4.5	U	labial/buccal	whole skull
AG	1	Radiographic	Enamel hypoplastic defects-number of pits	SMB 4A	4	2 to 6	3.5 to 4.5	U	lingual	whole skull
AG	1	Radiographic	Enamel hypoplastic defect - measurement 1 (mm)	SMB 4A	4	2 to 6	3.5 to 4.5	U	labial/buccal	whole skull
AG	1	Radiographic	Enamel hypoplastic defect - measurement 1 (mm)	SMB 4A	4	2 to 6	3.5 to 4.5	U	lingual	whole skull
AG	1	Radiographic	Enamel hypoplastic defect - measurement 2 (mm)	SMB 4A	4	2 to 6	3.5 to 4.5	U	labial/buccal	whole skull
AG	1	Radiographic	Enamel hypoplastic defect - measurement 2 (mm)	SMB 4A	4	2 to 6	3.5 to 4.5	U	lingual	whole skull
AG	1	Radiographic	Enamel hypoplastic defect - measurement 3 (mm)	SMB 4A	4	2 to 6	3.5 to 4.5	U	labial/buccal	whole skull
AG	1	Radiographic	Enamel hypoplastic defect - measurement 3 (mm)	SMB 4A	4	2 to 6	3.5 to 4.5	U	lingual	whole skull
AG	1	Radiographic	Enamel hypoplastic defect - measurement 4 (mm)	SMB 4A	4	2 to 6	3.5 to 4.5	U	labial/buccal	whole skull
AG	1	Radiographic	Enamel hypoplastic defect - measurement 4 (mm)	SMB 4A	4	2 to 6	3.5 to 4.5	U	lingual	whole skull
AG	1	Radiographic	IGD - present	SMB 4A	4	2 to 6	3.5 to 4.5	U	internal	whole skull
AG	1	L.v micro-CT	Inventory	SMB 4A	4	2 to 6	3.5 to 4.5	U	labial/buccal	whole skull	2	2	2	2		2		1			2	2	2	2		4		1			2	2	2	2		2		1			2	2	2	2		2		1
AG	1	L.v micro-CT	Tooth Wear	SMB 4A	4	2 to 6	3.5 to 4.5	U	occlusal	whole skull	2	2	2	2		2		0			2	2	2	2		0		1			3	2	2	2		2		0			3	2	2	2		2		0
AG	1	L.v micro-CT	Dental Trauma	SMB 4A	4	2 to 6	3.5 to 4.5	U	labial/buccal	whole skull	0	0	0	0		0					0	0	0	0		0					0	0	0	0		0					0	0	0	0		0
AG	1	L.v micro-CT	Dental Trauma	SMB 4A	4	2 to 6	3.5 to 4.5	U	lingual	whole skull	0	0	0	0		0					0	0	0	0		0					0	0	0	0		0					0	0	0	0		0
AG	1	L.v micro-CT	Occlusion	SMB 4A	4	2 to 6	3.5 to 4.5	U	occlusal	whole skull
AG	1	L.v micro-CT	Overbite	SMB 4A	4	2 to 6	3.5 to 4.5	U	occlusal	whole skull
AG	1	L.v micro-CT	Overjet	SMB 4A	4	2 to 6	3.5 to 4.5	U	occlusal	whole skull
AG	1	L.v micro-CT	Caries - present on tooth	SMB 4A	4	2 to 6	3.5 to 4.5	U	All	whole skull	0	0	0	0		0					0	0	0	0		0					0	0	0	0		0					0	0	0	0		0
AG	1	L.v micro-CT	Caries- location 1	SMB 4A	4	2 to 6	3.5 to 4.5	U	mesial	whole skull	0	0	0	0		0					0	0	0	0		0					0	0	0	0		0					0	0	0	0		0
AG	1	L.v micro-CT	Caries- location 2	SMB 4A	4	2 to 6	3.5 to 4.5	U	distal	whole skull	0	0	0	0		0					0	0	0	0		0					0	0	0	0		0					0	0	0	0		0
AG	1	L.v micro-CT	Caries- location 3	SMB 4A	4	2 to 6	3.5 to 4.5	U	occlusal	whole skull	0	0	0	0		0					0	0	0	0		0					0	0	0	0		0					0	0	0	0		0
AG	1	L.v micro-CT	Caries- location 4	SMB 4A	4	2 to 6	3.5 to 4.5	U	labial/buccal	whole skull	0	0	0	0		0					0	0	0	0		0					0	0	0	0		0					0	0	0	0		0
AG	1	L.v micro-CT	Caries- location 5	SMB 4A	4	2 to 6	3.5 to 4.5	U	lingual	whole skull	0	0	0	0		0					0	0	0	0		0					0	0	0	0		0					0	0	0	0		0
AG	1	L.v micro-CT	Caries _ CEJ 1	SMB 4A	4	2 to 6	3.5 to 4.5	U	labial/buccal	whole skull	0	0	0	0		0					0	0	0	0		0					0	0	0	0		0					0	0	0	0		0
AG	1	L.v micro-CT	Caries _ CEJ 2	SMB 4A	4	2 to 6	3.5 to 4.5	U	labial/buccal	whole skull	0	0	0	0		0					0	0	0	0		0					0	0	0	0		0					0	0	0	0		0
AG	1	L.v micro-CT	Caries _ CEJ 3	SMB 4A	4	2 to 6	3.5 to 4.5	U	labial/buccal	whole skull	0	0	0	0		0					0	0	0	0		0					0	0	0	0		0					0	0	0	0		0
AG	1	L.v micro-CT	Caries - Radiolucency	SMB 4A	4	2 to 6	3.5 to 4.5	U	labial/buccal	whole skull	0	0	0	0		0					0	0	0	0		0					0	0	0	0		0					0	0	0	0		0
AG	1	L.v micro-CT	Alveolar status	SMB 4A	4	2 to 6	3.5 to 4.5	U	labial/buccal	whole skull				1		1								1		1								1		1								1		1
AG	1	L.v micro-CT	Periodontal disease	SMB 4A	4	2 to 6	3.5 to 4.5	U	labial/buccal	whole skull	3.5	4.47	3.63	1.36		1.14					3.46	2.9	3.06	1.1		N/A					2.82	4.85	1.91	0.95		0					4.71	2.28	1.4	1.3		0.58
AG	1	L.v micro-CT	Periodontal disease	SMB 4A	4	2 to 6	3.5 to 4.5	U	lingual	whole skull	1.27	1.22	0.76	0.86		0					1.83	1.59	0	1.11		N/A					1.81	1.28	1.18	1.1		0					1.38	1.1	1.2	0.6		0.8
AG	1	L.v micro-CT	Enamel hypoplastic defect - present	SMB 4A	4	2 to 6	3.5 to 4.5	U	labial/buccal	whole skull	0	0	0	0		0					0	0	0	0		N/A					0	0	0	0		0					0	0	0	0		0
AG	1	L.v micro-CT	Enamel hypoplastic defect - present	SMB 4A	4	2 to 6	3.5 to 4.5	U	lingual	whole skull	0	0	0	0		0					0	0	0	0		N/A					1	1	0	0		0					1	1	0	0		0
AG	1	L.v micro-CT	Enamel hypoplastic defect - type -linear	SMB 4A	4	2 to 6	3.5 to 4.5	U	labial/buccal	whole skull	0	0	0	0		0					0	0	0	0		N/A					0	0	0	0		0					0	0	0	0		0
AG	1	L.v micro-CT	Enamel hypoplastic defect - type -linear	SMB 4A	4	2 to 6	3.5 to 4.5	U	lingual	whole skull	0	0	0	0		0					0	0	0	0		N/A					2	2	0	0		0					2	2	0	0		0
AG	1	L.v micro-CT	Enamel hypoplastic defects-number of lines	SMB 4A	4	2 to 6	3.5 to 4.5	U	labial/buccal	whole skull	0	0	0	0		0					0	0	0	0		N/A					0	0	0	0		0					0	0	0	0		0
AG	1	L.v micro-CT	Enamel hypoplastic defects-number of lines	SMB 4A	4	2 to 6	3.5 to 4.5	U	lingual	whole skull	0	0	0	0		0					0	0	0	0		N/A					0	0	0	0		0					0	0	0	0		0
AG	1	L.v micro-CT	Enamel hypoplastic defect - type - pits	SMB 4A	4	2 to 6	3.5 to 4.5	U	labial/buccal	whole skull	0	0	0	0		0					0	0	0	0		N/A					0	0	0	0		0					0	0	0	0		0
AG	1	L.v micro-CT	Enamel hypoplastic defect - type - pits	SMB 4A	4	2 to 6	3.5 to 4.5	U	lingual	whole skull	0	0	0	0		0					0	0	0	0		N/A					1	1	0	0		0					1	1	0	0		0
AG	1	L.v micro-CT	Enamel hypoplastic defects-number of pits	SMB 4A	4	2 to 6	3.5 to 4.5	U	labial/buccal	whole skull	0	0	0	0		0					0	0	0	0		N/A					0	0	0	0		0					0	0	0	0		0
AG	1	L.v micro-CT	Enamel hypoplastic defects-number of pits	SMB 4A	4	2 to 6	3.5 to 4.5	U	lingual	whole skull	0	0	0	0		0					0	0	0	0		N/A					1	1	0	0		0					1	1	0	0		0
AG	1	L.v micro-CT	Enamel hypoplastic defect - measurement 1 (mm)	SMB 4A	4	2 to 6	3.5 to 4.5	U	labial/buccal	whole skull	0	0	0	0		0					0	0	0	0		N/A					0	0	0	0		0					0	0	0	0		0
AG	1	L.v micro-CT	Enamel hypoplastic defect - measurement 1 (mm)	SMB 4A	4	2 to 6	3.5 to 4.5	U	lingual	whole skull	0	0	0	0		0					0	0	0	0		N/A					4.12	5.13	0	0		0					4.88	5.28	0	0		0
AG	1	L.v micro-CT	Enamel hypoplastic defect - measurement 2 (mm)	SMB 4A	4	2 to 6	3.5 to 4.5	U	labial/buccal	whole skull	0	0	0	0		0					0	0	0	0		N/A					0	0	0	0		0					0	0	0	0		0
AG	1	L.v micro-CT	Enamel hypoplastic defect - measurement 2 (mm)	SMB 4A	4	2 to 6	3.5 to 4.5	U	lingual	whole skull	0	0	0	0		0					0	0	0	0		N/A					0	0	0	0		0					0	0	0	0		0
AG	1	L.v micro-CT	Enamel hypoplastic defect - measurement 3 (mm)	SMB 4A	4	2 to 6	3.5 to 4.5	U	labial/buccal	whole skull	0	0	0	0		0					0	0	0	0		N/A					0	0	0	0		0					0	0	0	0		0
AG	1	L.v micro-CT	Enamel hypoplastic defect - measurement 3 (mm)	SMB 4A	4	2 to 6	3.5 to 4.5	U	lingual	whole skull	0	0	0	0		0					0	0	0	0		N/A					0	0	0	0		0					0	0	0	0		0
AG	1	L.v micro-CT	Enamel hypoplastic defect - measurement 4 (mm)	SMB 4A	4	2 to 6	3.5 to 4.5	U	labial/buccal	whole skull	0	0	0	0		0					0	0	0	0		N/A					0	0	0	0		0					0	0	0	0		0
AG	1	L.v micro-CT	Enamel hypoplastic defect - measurement 4 (mm)	SMB 4A	4	2 to 6	3.5 to 4.5	U	lingual	whole skull	0	0	0	0		0					0	0	0	0		N/A					0	0	0	0		0					0	0	0	0		0
AG	1	L.v micro-CT	IGD - present	SMB 4A	4	2 to 6	3.5 to 4.5	U	internal	whole skull	0	0	0	0		0					0	0	0	0		N/A					0	0	0	0		0					0	0	0	0		0
AG	1	S.v micro-CT	Inventory	SMB 4A	4	2 to 6		U	labial/buccal	Individual tooth samples
AG	1	S.v micro-CT	Tooth Wear	SMB 4A	4	2 to 6		U	occlusal	Individual tooth samples		2	2								3							1
AG	1	S.v micro-CT	Dental Trauma	SMB 4A	4	2 to 6		U	labial/buccal	Individual tooth samples		0	3								3							3
AG	1	S.v micro-CT	Dental Trauma	SMB 4A	4	2 to 6		U	lingual	Individual tooth samples		0	3								3							3
AG	1	S.v micro-CT	Occlusion	SMB 4A	4	2 to 6		U	occlusal	Individual tooth samples
AG	1	S.v micro-CT	Overbite	SMB 4A	4	2 to 6		U	occlusal	Individual tooth samples
AG	1	S.v micro-CT	Overjet	SMB 4A	4	2 to 6		U	occlusal	Individual tooth samples
AG	1	S.v micro-CT	Caries - present on tooth	SMB 4A	4	2 to 6		U	All	Individual tooth samples		0	0								0							0
AG	1	S.v micro-CT	Caries- location 1	SMB 4A	4	2 to 6		U	mesial	Individual tooth samples		0	0								0							0
AG	1	S.v micro-CT	Caries- location 2	SMB 4A	4	2 to 6		U	distal	Individual tooth samples		0	0								0							0
AG	1	S.v micro-CT	Caries- location 3	SMB 4A	4	2 to 6		U	occlusal	Individual tooth samples		0	0								0							0
AG	1	S.v micro-CT	Caries- location 4	SMB 4A	4	2 to 6		U	labial/buccal	Individual tooth samples		0	0								0							0
AG	1	S.v micro-CT	Caries- location 5	SMB 4A	4	2 to 6		U	lingual	Individual tooth samples		0	0								0							0
AG	1	S.v micro-CT	Caries _ CEJ 1	SMB 4A	4	2 to 6		U	labial/buccal	Individual tooth samples		0	0								0							0
AG	1	S.v micro-CT	Caries _ CEJ 2	SMB 4A	4	2 to 6		U	labial/buccal	Individual tooth samples		0	0								0							0
AG	1	S.v micro-CT	Caries _ CEJ 3	SMB 4A	4	2 to 6		U	labial/buccal	Individual tooth samples		0	0								0							0
AG	1	S.v micro-CT	Caries - Radiolucency	SMB 4A	4	2 to 6		U	labial/buccal	Individual tooth samples		0	0								0							0
AG	1	S.v micro-CT	Alveolar status	SMB 4A	4	2 to 6		U	labial/buccal	Individual tooth samples
AG	1	S.v micro-CT	Periodontal disease	SMB 4A	4	2 to 6		U	labial/buccal	Individual tooth samples
AG	1	S.v micro-CT	Periodontal disease	SMB 4A	4	2 to 6		U	labial/buccal	Individual tooth samples
AG	1	S.v micro-CT	Enamel hypoplastic defect - present	SMB 4A	4	2 to 6		U	labial/buccal	Individual tooth samples		1	1								1							0
AG	1	S.v micro-CT	Enamel hypoplastic defect - present	SMB 4A	4	2 to 6		U	lingual	Individual tooth samples		0	0								0							0
AG	1	S.v micro-CT	Enamel hypoplastic defect - type -linear	SMB 4A	4	2 to 6		U	labial/buccal	Individual tooth samples		2	2								2							0
AG	1	S.v micro-CT	Enamel hypoplastic defect - type -linear	SMB 4A	4	2 to 6		U	lingual	Individual tooth samples		0	0								0							0
AG	1	S.v micro-CT	Enamel hypoplastic defects-number of lines	SMB 4A	4	2 to 6		U	labial/buccal	Individual tooth samples		0	0								0							0
AG	1	S.v micro-CT	Enamel hypoplastic defects-number of lines	SMB 4A	4	2 to 6		U	lingual	Individual tooth samples		0	0								0							0
AG	1	S.v micro-CT	Enamel hypoplastic defect - type - pits	SMB 4A	4	2 to 6		U	labial/buccal	Individual tooth samples		1	1								1							0
AG	1	S.v micro-CT	Enamel hypoplastic defect - type - pits	SMB 4A	4	2 to 6		U	lingual	Individual tooth samples		0	0								0							0
AG	1	S.v micro-CT	Enamel hypoplastic defects-number of pits	SMB 4A	4	2 to 6		U	labial/buccal	Individual tooth samples		2	2								2							0
AG	1	S.v micro-CT	Enamel hypoplastic defects-number of pits	SMB 4A	4	2 to 6		U	lingual	Individual tooth samples		0	0								0							0
AG	1	S.v micro-CT	Enamel hypoplastic defect - measurement 1 (mm)	SMB 4A	4	2 to 6		U	labial/buccal	Individual tooth samples		1.66	5.82								5.39							0
AG	1	S.v micro-CT	Enamel hypoplastic defect - measurement 1 (mm)	SMB 4A	4	2 to 6		U	lingual	Individual tooth samples		0	0								0							0
AG	1	S.v micro-CT	Enamel hypoplastic defect - measurement 2 (mm)	SMB 4A	4	2 to 6		U	labial/buccal	Individual tooth samples		2.28	0								0							0
AG	1	S.v micro-CT	Enamel hypoplastic defect - measurement 2 (mm)	SMB 4A	4	2 to 6		U	lingual	Individual tooth samples		0	0								0							0
AG	1	S.v micro-CT	Enamel hypoplastic defect - measurement 3 (mm)	SMB 4A	4	2 to 6		U	labial/buccal	Individual tooth samples		4.77	0								0							0
AG	1	S.v micro-CT	Enamel hypoplastic defect - measurement 3 (mm)	SMB 4A	4	2 to 6		U	lingual	Individual tooth samples		0	0								0							0
AG	1	S.v micro-CT	Enamel hypoplastic defect - measurement 4 (mm)	SMB 4A	4	2 to 6		U	labial/buccal	Individual tooth samples		0	0								0							0
AG	1	S.v micro-CT	Enamel hypoplastic defect - measurement 4 (mm)	SMB 4A	4	2 to 6		U	lingual	Individual tooth samples		0	0								0							0
AG	1	S.v micro-CT	IGD - present	SMB 4A	4	2 to 6		U	internal	Individual tooth samples		0	0								0							0
AG	2	Macro	Inventory	SMB 4A	4	2 to 6	3.5 to 4.5	U	labial/buccal	whole skull	2	2	2	2		2		1			2	2	2	2		4		1			2	2	2	2		2		1	1		2	2	2	2		2		1	1
AG	2	Macro	Tooth Wear	SMB 4A	4	2 to 6	3.5 to 4.5	U	occlusal	whole skull	2	2	1	1		1		0			3	3	3	2		2		0			3	3	3	2		2		0	0		3	3	2	2		2		0	0
AG	2	Macro	Dental Trauma	SMB 4A	4	2 to 6	3.5 to 4.5	U	labial/buccal	whole skull	0	0	0	0		0		0			0	0	0	0		0		0			0	0	0	0		0		0	0		0	0	0	0		0		0	0
AG	2	Macro	Dental Trauma	SMB 4A	4	2 to 6	3.5 to 4.5	U	lingual	whole skull	0	0	0	0		0		0			0	0	0	0		0		0			0	0	0	0		0		0	0		0	0	0	0		0		0	0
AG	2	Macro	Occlusion	SMB 4A	4	2 to 6	3.5 to 4.5	U	occlusal	whole skull
AG	2	Macro	Overbite	SMB 4A	4	2 to 6	3.5 to 4.5	U	labial/buccal	whole skull
AG	2	Macro	Overjet	SMB 4A	4	2 to 6	3.5 to 4.5	U	labial/buccal	whole skull
AG	2	Macro	Caries - present on tooth	SMB 4A	4	2 to 6	3.5 to 4.5	U	All	whole skull	0	0	0	0		0		0			0	0	0	0		0		0			0	0	0	0		0		0	0		0	0	0	0		0		0	0
AG	2	Macro	Caries- location 1	SMB 4A	4	2 to 6	3.5 to 4.5	U	mesial	whole skull	0	0	0	0		0		0			0	0	0	0		0		0			0	0	0	0		0		0	0		0	0	0	0		0		0	0
AG	2	Macro	Caries- location 2	SMB 4A	4	2 to 6	3.5 to 4.5	U	distal	whole skull	0	0	0	0		0		0			0	0	0	0		0		0			0	0	0	0		0		0	0		0	0	0	0		0		0	0
AG	2	Macro	Caries- location 3	SMB 4A	4	2 to 6	3.5 to 4.5	U	occlusal	whole skull	0	0	0	0		0		0			0	0	0	0		0		0			0	0	0	0		0		0	0		0	0	0	0		0		0	0
AG	2	Macro	Caries- location 4	SMB 4A	4	2 to 6	3.5 to 4.5	U	labial/buccal	whole skull	0	0	0	0		0		0			0	0	0	0		0		0			0	0	0	0		0		0	0		0	0	0	0		0		0	0
AG	2	Macro	Caries- location 5	SMB 4A	4	2 to 6	3.5 to 4.5	U	lingual	whole skull	0	0	0	0		0		0			0	0	0	0		0		0			0	0	0	0		0		0	0		0	0	0	0		0		0	0
AG	2	Macro	Caries _ CEJ 1	SMB 4A	4	2 to 6	3.5 to 4.5	U	labial/buccal	whole skull	0	0	0	0		0		0			0	0	0	0		0		0			0	0	0	0		0		0	0		0	0	0	0		0		0	0
AG	2	Macro	Caries _ CEJ 2	SMB 4A	4	2 to 6	3.5 to 4.5	U	labial/buccal	whole skull	0	0	0	0		0		0			0	0	0	0		0		0			0	0	0	0		0		0	0		0	0	0	0		0		0	0
AG	2	Macro	Caries _ CEJ 3	SMB 4A	4	2 to 6	3.5 to 4.5	U	labial/buccal	whole skull	0	0	0	0		0		0			0	0	0	0		0		0			0	0	0	0		0		0	0		0	0	0	0		0		0	0
AG	2	Macro	Caries - Radiolucency	SMB 4A	4	2 to 6	3.5 to 4.5	U	labial/buccal	whole skull
AG	2	Macro	Alveolar status	SMB 4A	4	2 to 6	3.5 to 4.5	U	labial/buccal	whole skull				1		1								1		0								1		1								1		1
AG	2	Macro	Periodontal disease	SMB 4A	4	2 to 6	3.5 to 4.5	U	labial/buccal	whole skull	2	2	2	1		1					2	1.5	1	1		N/A					2	2	1	1		1					3	2	1	0		N/A
AG	2	Macro	Periodontal disease	SMB 4A	4	2 to 6	3.5 to 4.5	U	lingual	whole skull	1	1	1	0		0					1	1	0	0		N/A					1	1	0	0		0					1	1	0	0		N/A
AG	2	Macro	Enamel hypoplastic defect - present	SMB 4A	4	2 to 6	3.5 to 4.5	U	labial/buccal	whole skull	0	0	0	0		0					0	0	0	0		0					0	0	0	0		0					0	0	0	0		0
AG	2	Macro	Enamel hypoplastic defect - present	SMB 4A	4	2 to 6	3.5 to 4.5	U	lingual	whole skull	0	0	0	0		0					0	0	0	0		0					0	0	0	0		0					0	0	0	0		0
AG	2	Macro	Enamel hypoplastic defect - type -linear	SMB 4A	4	2 to 6	3.5 to 4.5	U	labial/buccal	whole skull	0	0	0	0		0					0	0	0	0		0					0	0	0	0		0					0	0	0	0		0
AG	2	Macro	Enamel hypoplastic defect - type -linear	SMB 4A	4	2 to 6	3.5 to 4.5	U	lingual	whole skull	0	0	0	0		0					0	0	0	0		0					0	0	0	0		0					0	0	0	0		0
AG	2	Macro	Enamel hypoplastic defects-number of lines	SMB 4A	4	2 to 6	3.5 to 4.5	U	labial/buccal	whole skull	0	0	0	0		0					0	0	0	0		0					0	0	0	0		0					0	0	0	0		0
AG	2	Macro	Enamel hypoplastic defects-number of lines	SMB 4A	4	2 to 6	3.5 to 4.5	U	lingual	whole skull	0	0	0	0		0					0	0	0	0		0					0	0	0	0		0					0	0	0	0		0
AG	2	Macro	Enamel hypoplastic defect - type - pits	SMB 4A	4	2 to 6	3.5 to 4.5	U	labial/buccal	whole skull	0	0	0	0		0					0	0	0	0		0					0	0	0	0		0					0	0	0	0		0
AG	2	Macro	Enamel hypoplastic defect - type - pits	SMB 4A	4	2 to 6	3.5 to 4.5	U	lingual	whole skull	0	0	0	0		0					0	0	0	0		0					0	0	0	0		0					0	0	0	0		0
AG	2	Macro	Enamel hypoplastic defects-number of pits	SMB 4A	4	2 to 6	3.5 to 4.5	U	labial/buccal	whole skull	0	0	0	0		0					0	0	0	0		0					0	0	0	0		0					0	0	0	0		0
AG	2	Macro	Enamel hypoplastic defects-number of pits	SMB 4A	4	2 to 6	3.5 to 4.5	U	lingual	whole skull	0	0	0	0		0					0	0	0	0		0					0	0	0	0		0					0	0	0	0		0
AG	2	Macro	Enamel hypoplastic defect - measurement 1 (mm)	SMB 4A	4	2 to 6	3.5 to 4.5	U	labial/buccal	whole skull	0	0	0	0		0					0	0	0	0		0					0	0	0	0		0					0	0	0	0		0
AG	2	Macro	Enamel hypoplastic defect - measurement 1 (mm)	SMB 4A	4	2 to 6	3.5 to 4.5	U	lingual	whole skull	0	0	0	0		0					0	0	0	0		0					0	0	0	0		0					0	0	0	0		0
AG	2	Macro	Enamel hypoplastic defect - measurement 2 (mm)	SMB 4A	4	2 to 6	3.5 to 4.5	U	labial/buccal	whole skull	0	0	0	0		0					0	0	0	0		0					0	0	0	0		0					0	0	0	0		0
AG	2	Macro	Enamel hypoplastic defect - measurement 2 (mm)	SMB 4A	4	2 to 6	3.5 to 4.5	U	lingual	whole skull	0	0	0	0		0					0	0	0	0		0					0	0	0	0		0					0	0	0	0		0
AG	2	Macro	Enamel hypoplastic defect - measurement 3 (mm)	SMB 4A	4	2 to 6	3.5 to 4.5	U	labial/buccal	whole skull	0	0	0	0		0					0	0	0	0		0					0	0	0	0		0					0	0	0	0		0
AG	2	Macro	Enamel hypoplastic defect - measurement 3 (mm)	SMB 4A	4	2 to 6	3.5 to 4.5	U	lingual	whole skull	0	0	0	0		0					0	0	0	0		0					0	0	0	0		0					0	0	0	0		0
AG	2	Macro	Enamel hypoplastic defect - measurement 4 (mm)	SMB 4A	4	2 to 6	3.5 to 4.5	U	labial/buccal	whole skull	0	0	0	0		0					0	0	0	0		0					0	0	0	0		0					0	0	0	0		0
AG	2	Macro	Enamel hypoplastic defect - measurement 4 (mm)	SMB 4A	4	2 to 6	3.5 to 4.5	U	lingual	whole skull	0	0	0	0		0					0	0	0	0		0					0	0	0	0		0					0	0	0	0		0
AG	2	Macro	IGD - present	SMB 4A	4	2 to 6	3.5 to 4.5	U	internal	whole skull
AG	2	Radiographic	Inventory	SMB 4A	4	2 to 6	3.5 to 4.5	U	labial/buccal	whole skull	2	2	2	2		2		1			2	2	2	2		4		4			2	2	2	2		2		1			2	2	2	2		2		1
AG	2	Radiographic	Tooth Wear	SMB 4A	4	2 to 6	3.5 to 4.5	U	occlusal	whole skull	2	2	2	2		2					2	2	2	2		N/A					2	2	2	2		2					2	2	2	2		2
AG	2	Radiographic	Dental Trauma	SMB 4A	4	2 to 6	3.5 to 4.5	U	labial/buccal	whole skull	0	0	0	0		0					0	0	0	0		0					0	0	0	0		0					0	0	0	0		0
AG	2	Radiographic	Dental Trauma	SMB 4A	4	2 to 6	3.5 to 4.5	U	lingual	whole skull	0	0	0	0		0					0	0	0	0		0					0	0	0	0		0					0	0	0	0		0
AG	2	Radiographic	Occlusion	SMB 4A	4	2 to 6	3.5 to 4.5	U	Occlusal	whole skull
AG	2	Radiographic	Overbite	SMB 4A	4	2 to 6	3.5 to 4.5	U	occlusal	whole skull
AG	2	Radiographic	Overjet	SMB 4A	4	2 to 6	3.5 to 4.5	U	occlusal	whole skull
AG	2	Radiographic	Caries - present on tooth	SMB 4A	4	2 to 6	3.5 to 4.5	U	All	whole skull	0	0	0	0		0					0	0	0	0		N/A					0	0	0	0		0					0	0	0	0		0
AG	2	Radiographic	Caries- location 1	SMB 4A	4	2 to 6	3.5 to 4.5	U	mesial	whole skull	0	0	0	0		0					0	0	0	0		N/A					0	0	0	0		0					0	0	0	0		0
AG	2	Radiographic	Caries- location 2	SMB 4A	4	2 to 6	3.5 to 4.5	U	distal	whole skull	0	0	0	0		0					0	0	0	0		N/A					0	0	0	0		0					0	0	0	0		0
AG	2	Radiographic	Caries- location 3	SMB 4A	4	2 to 6	3.5 to 4.5	U	occlusal	whole skull	0	0	0	0		0					0	0	0	0		N/A					0	0	0	0		0					0	0	0	0		0
AG	2	Radiographic	Caries- location 4	SMB 4A	4	2 to 6	3.5 to 4.5	U	labial/buccal	whole skull	0	0	0	0		0					0	0	0	0		N/A					0	0	0	0		0					0	0	0	0		0
AG	2	Radiographic	Caries- location 5	SMB 4A	4	2 to 6	3.5 to 4.5	U	lingual	whole skull	0	0	0	0		0					0	0	0	0		N/A					0	0	0	0		0					0	0	0	0		0
AG	2	Radiographic	Caries _ CEJ 1	SMB 4A	4	2 to 6	3.5 to 4.5	U	labial/buccal	whole skull	0	0	0	0		0					0	0	0	0		N/A					0	0	0	0		0					0	0	0	0		0
AG	2	Radiographic	Caries _ CEJ 2	SMB 4A	4	2 to 6	3.5 to 4.5	U	labial/buccal	whole skull	0	0	0	0		0					0	0	0	0		N/A					0	0	0	0		0					0	0	0	0		0
AG	2	Radiographic	Caries _ CEJ 3	SMB 4A	4	2 to 6	3.5 to 4.5	U	labial/buccal	whole skull	0	0	0	0		0					0	0	0	0		N/A					0	0	0	0		0					0	0	0	0		0
AG	2	Radiographic	Caries - Radiolucency	SMB 4A	4	2 to 6	3.5 to 4.5	U	labial/buccal	whole skull	0	0	0	0		0					0	0	0	0		N/A					0	0	0	0		0					0	0	0	0		0
AG	2	Radiographic	Alveolar status	SMB 4A	4	2 to 6	3.5 to 4.5	U	labial/buccal	whole skull
AG	2	Radiographic	Periodontal disease	SMB 4A	4	2 to 6	3.5 to 4.5	U	labial/buccal	whole skull
AG	2	Radiographic	Periodontal disease	SMB 4A	4	2 to 6	3.5 to 4.5	U	lingual	whole skull
AG	2	Radiographic	Enamel hypoplastic defect - present	SMB 4A	4	2 to 6	3.5 to 4.5	U	labial/buccal	whole skull
AG	2	Radiographic	Enamel hypoplastic defect - present	SMB 4A	4	2 to 6	3.5 to 4.5	U	lingual	whole skull
AG	2	Radiographic	Enamel hypoplastic defect - type -linear	SMB 4A	4	2 to 6	3.5 to 4.5	U	labial/buccal	whole skull
AG	2	Radiographic	Enamel hypoplastic defect - type -linear	SMB 4A	4	2 to 6	3.5 to 4.5	U	lingual	whole skull
AG	2	Radiographic	Enamel hypoplastic defects-number of lines	SMB 4A	4	2 to 6	3.5 to 4.5	U	labial/buccal	whole skull
AG	2	Radiographic	Enamel hypoplastic defects-number of lines	SMB 4A	4	2 to 6	3.5 to 4.5	U	lingual	whole skull
AG	2	Radiographic	Enamel hypoplastic defect - type - pits	SMB 4A	4	2 to 6	3.5 to 4.5	U	labial/buccal	whole skull
AG	2	Radiographic	Enamel hypoplastic defect - type - pits	SMB 4A	4	2 to 6	3.5 to 4.5	U	lingual	whole skull
AG	2	Radiographic	Enamel hypoplastic defects-number of pits	SMB 4A	4	2 to 6	3.5 to 4.5	U	labial/buccal	whole skull
AG	2	Radiographic	Enamel hypoplastic defects-number of pits	SMB 4A	4	2 to 6	3.5 to 4.5	U	lingual	whole skull
AG	2	Radiographic	Enamel hypoplastic defect - measurement 1 (mm)	SMB 4A	4	2 to 6	3.5 to 4.5	U	labial/buccal	whole skull
AG	2	Radiographic	Enamel hypoplastic defect - measurement 1 (mm)	SMB 4A	4	2 to 6	3.5 to 4.5	U	lingual	whole skull
AG	2	Radiographic	Enamel hypoplastic defect - measurement 2 (mm)	SMB 4A	4	2 to 6	3.5 to 4.5	U	labial/buccal	whole skull
AG	2	Radiographic	Enamel hypoplastic defect - measurement 2 (mm)	SMB 4A	4	2 to 6	3.5 to 4.5	U	lingual	whole skull
AG	2	Radiographic	Enamel hypoplastic defect - measurement 3 (mm)	SMB 4A	4	2 to 6	3.5 to 4.5	U	labial/buccal	whole skull
AG	2	Radiographic	Enamel hypoplastic defect - measurement 3 (mm)	SMB 4A	4	2 to 6	3.5 to 4.5	U	lingual	whole skull
AG	2	Radiographic	Enamel hypoplastic defect - measurement 4 (mm)	SMB 4A	4	2 to 6	3.5 to 4.5	U	labial/buccal	whole skull
AG	2	Radiographic	Enamel hypoplastic defect - measurement 4 (mm)	SMB 4A	4	2 to 6	3.5 to 4.5	U	lingual	whole skull
AG	2	Radiographic	IGD - present	SMB 4A	4	2 to 6	3.5 to 4.5	U	internal	whole skull
AG	2	L.v micro-CT	Inventory	SMB 4A	4	2 to 6	3.5 to 4.5	U	labial/buccal	whole skull	2	2	2	2		2		1			2	2	2	2		4		1			2	2	2	2		2		1			2	2	2	2		2		1
AG	2	L.v micro-CT	Tooth Wear	SMB 4A	4	2 to 6	3.5 to 4.5	U	occlusal	whole skull	2	2	2	2		2		0			2	2	2	2		0		1			3	2	2	2		2		0			3	2	2	2		2		0
AG	2	L.v micro-CT	Dental Trauma	SMB 4A	4	2 to 6	3.5 to 4.5	U	labial/buccal	whole skull	0	0	0	0		0					0	0	0	0		0					0	0	0	0		0					0	0	0	0		0
AG	2	L.v micro-CT	Dental Trauma	SMB 4A	4	2 to 6	3.5 to 4.5	U	lingual	whole skull	0	0	0	0		0					0	0	0	0		0					0	0	0	0		0					0	0	0	0		0
AG	2	L.v micro-CT	Occlusion	SMB 4A	4	2 to 6	3.5 to 4.5	U	occlusal	whole skull
AG	2	L.v micro-CT	Overbite	SMB 4A	4	2 to 6	3.5 to 4.5	U	occlusal	whole skull
AG	2	L.v micro-CT	Overjet	SMB 4A	4	2 to 6	3.5 to 4.5	U	occlusal	whole skull
AG	2	L.v micro-CT	Caries - present on tooth	SMB 4A	4	2 to 6	3.5 to 4.5	U	All	whole skull	0	0	0	0		0					0	0	0	0		0					0	0	0	0		0					0	0	0	0		0
AG	2	L.v micro-CT	Caries- location 1	SMB 4A	4	2 to 6	3.5 to 4.5	U	mesial	whole skull	0	0	0	0		0					0	0	0	0		0					0	0	0	0		0					0	0	0	0		0
AG	2	L.v micro-CT	Caries- location 2	SMB 4A	4	2 to 6	3.5 to 4.5	U	distal	whole skull	0	0	0	0		0					0	0	0	0		0					0	0	0	0		0					0	0	0	0		0
AG	2	L.v micro-CT	Caries- location 3	SMB 4A	4	2 to 6	3.5 to 4.5	U	occlusal	whole skull	0	0	0	0		0					0	0	0	0		0					0	0	0	0		0					0	0	0	0		0
AG	2	L.v micro-CT	Caries- location 4	SMB 4A	4	2 to 6	3.5 to 4.5	U	labial/buccal	whole skull	0	0	0	0		0					0	0	0	0		0					0	0	0	0		0					0	0	0	0		0
AG	2	L.v micro-CT	Caries- location 5	SMB 4A	4	2 to 6	3.5 to 4.5	U	lingual	whole skull	0	0	0	0		0					0	0	0	0		0					0	0	0	0		0					0	0	0	0		0
AG	2	L.v micro-CT	Caries _ CEJ 1	SMB 4A	4	2 to 6	3.5 to 4.5	U	labial/buccal	whole skull	0	0	0	0		0					0	0	0	0		0					0	0	0	0		0					0	0	0	0		0
AG	2	L.v micro-CT	Caries _ CEJ 2	SMB 4A	4	2 to 6	3.5 to 4.5	U	labial/buccal	whole skull	0	0	0	0		0					0	0	0	0		0					0	0	0	0		0					0	0	0	0		0
AG	2	L.v micro-CT	Caries _ CEJ 3	SMB 4A	4	2 to 6	3.5 to 4.5	U	labial/buccal	whole skull	0	0	0	0		0					0	0	0	0		0					0	0	0	0		0					0	0	0	0		0
AG	2	L.v micro-CT	Caries - Radiolucency	SMB 4A	4	2 to 6	3.5 to 4.5	U	labial/buccal	whole skull	0	0	0	0		0					0	0	0	0		0					0	0	0	0		0					0	0	0	0		0
AG	2	L.v micro-CT	Alveolar status	SMB 4A	4	2 to 6	3.5 to 4.5	U	labial/buccal	whole skull				1		1								1		1								1		1								1		1
AG	2	L.v micro-CT	Periodontal disease	SMB 4A	4	2 to 6	3.5 to 4.5	U	labial/buccal	whole skull	3.5	4.5	3.7	1.4		1					1.5	3	3	1		N/A					2.8	4.8	2	1		0					4.66	2.1	1.5	1		0.5
AG	2	L.v micro-CT	Periodontal disease	SMB 4A	4	2 to 6	3.5 to 4.5	U	lingual	whole skull	1.5	1.2	0.84	1		0					1.8	1.6	0	1		N/A					2	1.3	1	1		0					1.5	1	1	0.8		1
AG	2	L.v micro-CT	Enamel hypoplastic defect - present	SMB 4A	4	2 to 6	3.5 to 4.5	U	labial/buccal	whole skull	0	0	0	0		0					0	0	0	0		N/A					0	0	0	0		0					0	0	0	0		0
AG	2	L.v micro-CT	Enamel hypoplastic defect - present	SMB 4A	4	2 to 6	3.5 to 4.5	U	lingual	whole skull	0	0	0	0		0					0	0	0	0		N/A					1	1	0	0		0					1	1	0	0		0
AG	2	L.v micro-CT	Enamel hypoplastic defect - type -linear	SMB 4A	4	2 to 6	3.5 to 4.5	U	labial/buccal	whole skull	0	0	0	0		0					0	0	0	0		N/A					0	0	0	0		0					0	0	0	0		0
AG	2	L.v micro-CT	Enamel hypoplastic defect - type -linear	SMB 4A	4	2 to 6	3.5 to 4.5	U	lingual	whole skull	0	0	0	0		0					0	0	0	0		N/A					2	2	0	0		0					2	2	0	0		0
AG	2	L.v micro-CT	Enamel hypoplastic defects-number of lines	SMB 4A	4	2 to 6	3.5 to 4.5	U	labial/buccal	whole skull	0	0	0	0		0					0	0	0	0		N/A					0	0	0	0		0					0	0	0	0		0
AG	2	L.v micro-CT	Enamel hypoplastic defects-number of lines	SMB 4A	4	2 to 6	3.5 to 4.5	U	lingual	whole skull	0	0	0	0		0					0	0	0	0		N/A					0	0	0	0		0					0	0	0	0		0
AG	2	L.v micro-CT	Enamel hypoplastic defect - type - pits	SMB 4A	4	2 to 6	3.5 to 4.5	U	labial/buccal	whole skull	0	0	0	0		0					0	0	0	0		N/A					0	0	0	0		0					0	0	0	0		0
AG	2	L.v micro-CT	Enamel hypoplastic defect - type - pits	SMB 4A	4	2 to 6	3.5 to 4.5	U	lingual	whole skull	0	0	0	0		0					0	0	0	0		N/A					1	1	0	0		0					1	1	0	0		0
AG	2	L.v micro-CT	Enamel hypoplastic defects-number of pits	SMB 4A	4	2 to 6	3.5 to 4.5	U	labial/buccal	whole skull	0	0	0	0		0					0	0	0	0		N/A					0	0	0	0		0					0	0	0	0		0
AG	2	L.v micro-CT	Enamel hypoplastic defects-number of pits	SMB 4A	4	2 to 6	3.5 to 4.5	U	lingual	whole skull	0	0	0	0		0					0	0	0	0		N/A					1	1	0	0		0					1	1	0	0		0
AG	2	L.v micro-CT	Enamel hypoplastic defect - measurement 1 (mm)	SMB 4A	4	2 to 6	3.5 to 4.5	U	labial/buccal	whole skull	0	0	0	0		0					0	0	0	0		N/A					0	0	0	0		0					0	0	0	0		0
AG	2	L.v micro-CT	Enamel hypoplastic defect - measurement 1 (mm)	SMB 4A	4	2 to 6	3.5 to 4.5	U	lingual	whole skull	0	0	0	0		0					0	0	0	0		N/A					4	5	0	0		0					5	5.45	0	0		0
AG	2	L.v micro-CT	Enamel hypoplastic defect - measurement 2 (mm)	SMB 4A	4	2 to 6	3.5 to 4.5	U	labial/buccal	whole skull	0	0	0	0		0					0	0	0	0		N/A					0	0	0	0		0					0	0	0	0		0
AG	2	L.v micro-CT	Enamel hypoplastic defect - measurement 2 (mm)	SMB 4A	4	2 to 6	3.5 to 4.5	U	lingual	whole skull	0	0	0	0		0					0	0	0	0		N/A					0	0	0	0		0					0	0	0	0		0
AG	2	L.v micro-CT	Enamel hypoplastic defect - measurement 3 (mm)	SMB 4A	4	2 to 6	3.5 to 4.5	U	labial/buccal	whole skull	0	0	0	0		0					0	0	0	0		N/A					0	0	0	0		0					0	0	0	0		0
AG	2	L.v micro-CT	Enamel hypoplastic defect - measurement 3 (mm)	SMB 4A	4	2 to 6	3.5 to 4.5	U	lingual	whole skull	0	0	0	0		0					0	0	0	0		N/A					0	0	0	0		0					0	0	0	0		0
AG	2	L.v micro-CT	Enamel hypoplastic defect - measurement 4 (mm)	SMB 4A	4	2 to 6	3.5 to 4.5	U	labial/buccal	whole skull	0	0	0	0		0					0	0	0	0		N/A					0	0	0	0		0					0	0	0	0		0
AG	2	L.v micro-CT	Enamel hypoplastic defect - measurement 4 (mm)	SMB 4A	4	2 to 6	3.5 to 4.5	U	lingual	whole skull	0	0	0	0		0					0	0	0	0		N/A					0	0	0	0		0					0	0	0	0		0
AG	2	L.v micro-CT	IGD - present	SMB 4A	4	2 to 6	3.5 to 4.5	U	internal	whole skull	0	0	0	0		0					0	0	0	0		N/A					0	0	0	0		0					0	0	0	0		0
AG	2	S.v micro-CT	Inventory	SMB 4A	4	2 to 6		U	labial/buccal	Individual tooth samples
AG	2	S.v micro-CT	Tooth Wear	SMB 4A	4	2 to 6		U	occlusal	Individual tooth samples		2	3								3							1
AG	2	S.v micro-CT	Dental Trauma	SMB 4A	4	2 to 6		U	labial/buccal	Individual tooth samples		0	3								3							3
AG	2	S.v micro-CT	Dental Trauma	SMB 4A	4	2 to 6		U	lingual	Individual tooth samples		0	3								3							3
AG	2	S.v micro-CT	Occlusion	SMB 4A	4	2 to 6		U	occlusal	Individual tooth samples
AG	2	S.v micro-CT	Overbite	SMB 4A	4	2 to 6		U	occlusal	Individual tooth samples
AG	2	S.v micro-CT	Overjet	SMB 4A	4	2 to 6		U	occlusal	Individual tooth samples
AG	2	S.v micro-CT	Caries - present on tooth	SMB 4A	4	2 to 6		U	All	Individual tooth samples		0	0								0							0
AG	2	S.v micro-CT	Caries- location 1	SMB 4A	4	2 to 6		U	mesial	Individual tooth samples		0	0								0							0
AG	2	S.v micro-CT	Caries- location 2	SMB 4A	4	2 to 6		U	distal	Individual tooth samples		0	0								0							0
AG	2	S.v micro-CT	Caries- location 3	SMB 4A	4	2 to 6		U	occlusal	Individual tooth samples		0	0								0							0
AG	2	S.v micro-CT	Caries- location 4	SMB 4A	4	2 to 6		U	labial/buccal	Individual tooth samples		0	0								0							0
AG	2	S.v micro-CT	Caries- location 5	SMB 4A	4	2 to 6		U	lingual	Individual tooth samples		0	0								0							0
AG	2	S.v micro-CT	Caries _ CEJ 1	SMB 4A	4	2 to 6		U	labial/buccal	Individual tooth samples		0	0								0							0
AG	2	S.v micro-CT	Caries _ CEJ 2	SMB 4A	4	2 to 6		U	labial/buccal	Individual tooth samples		0	0								0							0
AG	2	S.v micro-CT	Caries _ CEJ 3	SMB 4A	4	2 to 6		U	labial/buccal	Individual tooth samples		0	0								0							0
AG	2	S.v micro-CT	Caries - Radiolucency	SMB 4A	4	2 to 6		U	labial/buccal	Individual tooth samples		0	0								0							0
AG	2	S.v micro-CT	Alveolar status	SMB 4A	4	2 to 6		U	labial/buccal	Individual tooth samples
AG	2	S.v micro-CT	Periodontal disease	SMB 4A	4	2 to 6		U	labial/buccal	Individual tooth samples
AG	2	S.v micro-CT	Periodontal disease	SMB 4A	4	2 to 6		U	labial/buccal	Individual tooth samples
AG	2	S.v micro-CT	Enamel hypoplastic defect - present	SMB 4A	4	2 to 6		U	labial/buccal	Individual tooth samples		1	1								1							0
AG	2	S.v micro-CT	Enamel hypoplastic defect - present	SMB 4A	4	2 to 6		U	lingual	Individual tooth samples		0	0								0							0
AG	2	S.v micro-CT	Enamel hypoplastic defect - type -linear	SMB 4A	4	2 to 6		U	labial/buccal	Individual tooth samples		2	2								2							0
AG	2	S.v micro-CT	Enamel hypoplastic defect - type -linear	SMB 4A	4	2 to 6		U	lingual	Individual tooth samples		0	0								0							0
AG	2	S.v micro-CT	Enamel hypoplastic defects-number of lines	SMB 4A	4	2 to 6		U	labial/buccal	Individual tooth samples		0	0								0							0
AG	2	S.v micro-CT	Enamel hypoplastic defects-number of lines	SMB 4A	4	2 to 6		U	lingual	Individual tooth samples		0	0								0							0
AG	2	S.v micro-CT	Enamel hypoplastic defect - type - pits	SMB 4A	4	2 to 6		U	labial/buccal	Individual tooth samples		1	1								1							0
AG	2	S.v micro-CT	Enamel hypoplastic defect - type - pits	SMB 4A	4	2 to 6		U	lingual	Individual tooth samples		0	0								0							0
AG	2	S.v micro-CT	Enamel hypoplastic defects-number of pits	SMB 4A	4	2 to 6		U	labial/buccal	Individual tooth samples		2	1								1							0
AG	2	S.v micro-CT	Enamel hypoplastic defects-number of pits	SMB 4A	4	2 to 6		U	lingual	Individual tooth samples		0	0								0							0
AG	2	S.v micro-CT	Enamel hypoplastic defect - measurement 1 (mm)	SMB 4A	4	2 to 6		U	labial/buccal	Individual tooth samples		1.75	5.8								5.5							0
AG	2	S.v micro-CT	Enamel hypoplastic defect - measurement 1 (mm)	SMB 4A	4	2 to 6		U	lingual	Individual tooth samples		0	0								0							0
AG	2	S.v micro-CT	Enamel hypoplastic defect - measurement 2 (mm)	SMB 4A	4	2 to 6		U	labial/buccal	Individual tooth samples		2.4	0								0							0
AG	2	S.v micro-CT	Enamel hypoplastic defect - measurement 2 (mm)	SMB 4A	4	2 to 6		U	lingual	Individual tooth samples		0	0								0							0
AG	2	S.v micro-CT	Enamel hypoplastic defect - measurement 3 (mm)	SMB 4A	4	2 to 6		U	labial/buccal	Individual tooth samples		5	0								0							0
AG	2	S.v micro-CT	Enamel hypoplastic defect - measurement 3 (mm)	SMB 4A	4	2 to 6		U	lingual	Individual tooth samples		0	0								0							0
AG	2	S.v micro-CT	Enamel hypoplastic defect - measurement 4 (mm)	SMB 4A	4	2 to 6		U	labial/buccal	Individual tooth samples		0	0								0							0
AG	2	S.v micro-CT	Enamel hypoplastic defect - measurement 4 (mm)	SMB 4A	4	2 to 6		U	lingual	Individual tooth samples		0	0								0							0
AG	2	S.v micro-CT	IGD - present	SMB 4A	4	2 to 6		U	internal	Individual tooth samples		0	0								0							0
MM	1	Macro	Inventory	SMB 4A	4	2 to 6	2.5 to 3.5	U	labial/buccal	whole skull	2	2	2	2		2					2	2	2	4		4					2	2	2	2		1					2	2	2	2		1
MM	1	Macro	Tooth Wear	SMB 4A	4	2 to 6	2.5 to 3.6	U	occlusal	whole skull	3	2	1	0		0					3	2	1	0		1					3	2	1	1		0					3	2	1	1		0
MM	1	Macro	Dental Trauma	SMB 4A	4	2 to 6	2.5 to 3.7	U	labial/buccal	whole skull	0	0	0	0		0					0	0	0	0		0					0	0	0	0		0					0	0	0	0		0
MM	1	Macro	Dental Trauma	SMB 4A	4	2 to 6	2.5 to 3.8	U	lingual	whole skull	0	0	0	0		0					0	0	0	0		0					0	0	0	0		0					0	0	0	0		0
MM	1	Macro	Occlusion	SMB 4A	4	2 to 6	2.5 to 3.9	U	occlusal	whole skull
MM	1	Macro	Overbite	SMB 4A	4	2 to 6	2.5 to 3.10	U	labial/buccal	whole skull
MM	1	Macro	Overjet	SMB 4A	4	2 to 6	2.5 to 3.11	U	labial/buccal	whole skull
MM	1	Macro	Caries - present on tooth	SMB 4A	4	2 to 6	2.5 to 3.12	U	All	whole skull	0	0	0	0		0					0	0	0	0		0					0	0	0	0		0					0	0	0	0		0
MM	1	Macro	Caries- location 1	SMB 4A	4	2 to 6	2.5 to 3.13	U	mesial	whole skull	0	0	0	0		0					0	0	0	0		0					0	0	0	0		0					0	0	0	0		0
MM	1	Macro	Caries- location 2	SMB 4A	4	2 to 6	2.5 to 3.14	U	distal	whole skull	0	0	0	0		0					0	0	0	0		0					0	0	0	0		0					0	0	0	0		0
MM	1	Macro	Caries- location 3	SMB 4A	4	2 to 6	2.5 to 3.15	U	occlusal	whole skull	0	0	0	0		0					0	0	0	0		0					0	0	0	0		0					0	0	0	0		0
MM	1	Macro	Caries- location 4	SMB 4A	4	2 to 6	2.5 to 3.16	U	labial/buccal	whole skull	0	0	0	0		0					0	0	0	0		0					0	0	0	0		0					0	0	0	0		0
MM	1	Macro	Caries- location 5	SMB 4A	4	2 to 6	2.5 to 3.17	U	lingual	whole skull	0	0	0	0		0					0	0	0	0		0					0	0	0	0		0					0	0	0	0		0
MM	1	Macro	Caries _ CEJ 1	SMB 4A	4	2 to 6	2.5 to 3.18	U	labial/buccal	whole skull	0	0	0	0		0					0	0	0	0		0					0	0	0	0		0					0	0	0	0		0
MM	1	Macro	Caries _ CEJ 2	SMB 4A	4	2 to 6	2.5 to 3.19	U	labial/buccal	whole skull	0	0	0	0		0					0	0	0	0		0					0	0	0	0		0					0	0	0	0		0
MM	1	Macro	Caries _ CEJ 3	SMB 4A	4	2 to 6	2.5 to 3.20	U	labial/buccal	whole skull	0	0	0	0		0					0	0	0	0		0					0	0	0	0		0					0	0	0	0		0
MM	1	Macro	Caries - Radiolucency	SMB 4A	4	2 to 6	2.5 to 3.21	U	labial/buccal	whole skull
MM	1	Macro	Alveolar status	SMB 4A	4	2 to 6	2.5 to 3.22	U	labial/buccal	whole skull				1		1								1		1								1		1								1		1
MM	1	Macro	Periodontal disease	SMB 4A	4	2 to 6	2.5 to 3.23	U	labial/buccal	whole skull	2	3	3	1		1					4	2	1	N/A		N/A					2	2	2	0		N/A					3	2	1	0		N/A
MM	1	Macro	Periodontal disease	SMB 4A	4	2 to 6	2.5 to 3.24	U	lingual	whole skull	1	1	1	0		0					2	1	0	N/A		N/A					1	1	0	0		N/A					1	1	0	0		N/A
MM	1	Macro	Enamel hypoplastic defect - present	SMB 4A	4	2 to 6	2.5 to 3.25	U	labial/buccal	whole skull	0	0	0	0		0					0	0	0	0		0					0	0	0	0		0					0	0	0	0		0
MM	1	Macro	Enamel hypoplastic defect - present	SMB 4A	4	2 to 6	2.5 to 3.26	U	lingual	whole skull	0	0	0	0		0					0	0	0	0		0					0	0	0	0		0					0	0	0	0		0
MM	1	Macro	Enamel hypoplastic defect - type -linear	SMB 4A	4	2 to 6	2.5 to 3.27	U	labial/buccal	whole skull	0	0	0	0		0					0	0	0	0		0					0	0	0	0		0					0	0	0	0		0
MM	1	Macro	Enamel hypoplastic defect - type -linear	SMB 4A	4	2 to 6	2.5 to 3.28	U	lingual	whole skull	0	0	0	0		0					0	0	0	0		0					0	0	0	0		0					0	0	0	0		0
MM	1	Macro	Enamel hypoplastic defects-number of lines	SMB 4A	4	2 to 6	2.5 to 3.29	U	labial/buccal	whole skull	0	0	0	0		0					0	0	0	0		0					0	0	0	0		0					0	0	0	0		0
MM	1	Macro	Enamel hypoplastic defects-number of lines	SMB 4A	4	2 to 6	2.5 to 3.30	U	lingual	whole skull	0	0	0	0		0					0	0	0	0		0					0	0	0	0		0					0	0	0	0		0
MM	1	Macro	Enamel hypoplastic defect - type - pits	SMB 4A	4	2 to 6	2.5 to 3.31	U	labial/buccal	whole skull	0	0	0	0		0					0	0	0	0		0					0	0	0	0		0					0	0	0	0		0
MM	1	Macro	Enamel hypoplastic defect - type - pits	SMB 4A	4	2 to 6	2.5 to 3.32	U	lingual	whole skull	0	0	0	0		0					0	0	0	0		0					0	0	0	0		0					0	0	0	0		0
MM	1	Macro	Enamel hypoplastic defects-number of pits	SMB 4A	4	2 to 6	2.5 to 3.33	U	labial/buccal	whole skull	0	0	0	0		0					0	0	0	0		0					0	0	0	0		0					0	0	0	0		0
MM	1	Macro	Enamel hypoplastic defects-number of pits	SMB 4A	4	2 to 6	2.5 to 3.34	U	lingual	whole skull	0	0	0	0		0					0	0	0	0		0					0	0	0	0		0					0	0	0	0		0
MM	1	Macro	Enamel hypoplastic defect - measurement 1 (mm)	SMB 4A	4	2 to 6	2.5 to 3.35	U	labial/buccal	whole skull	0	0	0	0		0					0	0	0	0		0					0	0	0	0		0					0	0	0	0		0
MM	1	Macro	Enamel hypoplastic defect - measurement 1 (mm)	SMB 4A	4	2 to 6	2.5 to 3.36	U	lingual	whole skull	0	0	0	0		0					0	0	0	0		0					0	0	0	0		0					0	0	0	0		0
MM	1	Macro	Enamel hypoplastic defect - measurement 2 (mm)	SMB 4A	4	2 to 6	2.5 to 3.37	U	labial/buccal	whole skull	0	0	0	0		0					0	0	0	0		0					0	0	0	0		0					0	0	0	0		0
MM	1	Macro	Enamel hypoplastic defect - measurement 2 (mm)	SMB 4A	4	2 to 6	2.5 to 3.38	U	lingual	whole skull	0	0	0	0		0					0	0	0	0		0					0	0	0	0		0					0	0	0	0		0
MM	1	Macro	Enamel hypoplastic defect - measurement 3 (mm)	SMB 4A	4	2 to 6	2.5 to 3.39	U	labial/buccal	whole skull	0	0	0	0		0					0	0	0	0		0					0	0	0	0		0					0	0	0	0		0
MM	1	Macro	Enamel hypoplastic defect - measurement 3 (mm)	SMB 4A	4	2 to 6	2.5 to 3.40	U	lingual	whole skull	0	0	0	0		0					0	0	0	0		0					0	0	0	0		0					0	0	0	0		0
MM	1	Macro	Enamel hypoplastic defect - measurement 4 (mm)	SMB 4A	4	2 to 6	2.5 to 3.41	U	labial/buccal	whole skull	0	0	0	0		0					0	0	0	0		0					0	0	0	0		0					0	0	0	0		0
MM	1	Macro	Enamel hypoplastic defect - measurement 4 (mm)	SMB 4A	4	2 to 6	2.5 to 3.42	U	lingual	whole skull	0	0	0	0		0					0	0	0	0		0					0	0	0	0		0					0	0	0	0		0
MM	1	Macro	IGD - present	SMB 4A	4	2 to 6	2.5 to 3.43	U	internal	whole skull
JW	1	Radiographic	Inventory	SMB 4A	4	2 to 6	2.5 to 3.44	U	labial/buccal	whole skull	2	2	2	2		2		1			2	2	2	2		4		4			2	2	2	2		2		1			2	2	2	2		2		1
JW	1	Radiographic	Tooth Wear	SMB 4A	4	2 to 6	4 to 5	U	occlusal	whole skull	3	3	3	2		2					3	3	3	2		N/A					3	3	3	2		2					3	3	3	2		2
JW	1	Radiographic	Dental Trauma	SMB 4A	4	2 to 6	4 to 5	U	labial/buccal	whole skull	0	0	0	0		0					0	0	0	0		0					0	0	0	0		0					0	0	0	0		0
JW	1	Radiographic	Dental Trauma	SMB 4A	4	2 to 6	4 to 5	U	lingual	whole skull	0	0	0	0		0					0	0	0	0		0					0	0	0	0		0					0	0	0	0		0
JW	1	Radiographic	Occlusion	SMB 4A	4	2 to 6	4 to 5	U	Occlusal	whole skull
JW	1	Radiographic	Overbite	SMB 4A	4	2 to 6	4 to 5	U	occlusal	whole skull
JW	1	Radiographic	Overjet	SMB 4A	4	2 to 6	4 to 5	U	occlusal	whole skull
DH	1	Radiographic	Caries - present on tooth	SMB 4A	4	2 to 6	4 to 5	U	All	whole skull	0	0	0	0		0					0	0	0	0		N/A					0	0	0	0		0					0	0	0	0		0
DH	1	Radiographic	Caries- location 1	SMB 4A	4	2 to 6	4 to 5	U	mesial	whole skull	0	0	0	0		0					0	0	0	0		N/A					0	0	0	0		0					0	0	0	0		0
DH	1	Radiographic	Caries- location 2	SMB 4A	4	2 to 6	4 to 5	U	distal	whole skull	0	0	0	0		0					0	0	0	0		N/A					0	0	0	0		0					0	0	0	0		0
DH	1	Radiographic	Caries- location 3	SMB 4A	4	2 to 6	4 to 5	U	occlusal	whole skull	0	0	0	0		0					0	0	0	0		N/A					0	0	0	0		0					0	0	0	0		0
DH	1	Radiographic	Caries- location 4	SMB 4A	4	2 to 6	4 to 5	U	labial/buccal	whole skull	0	0	0	0		0					0	0	0	0		N/A					0	0	0	0		0					0	0	0	0		0
DH	1	Radiographic	Caries- location 5	SMB 4A	4	2 to 6	4 to 5	U	lingual	whole skull	0	0	0	0		0					0	0	0	0		N/A					0	0	0	0		0					0	0	0	0		0
DH	1	Radiographic	Caries _ CEJ 1	SMB 4A	4	2 to 6	4 to 5	U	labial/buccal	whole skull	0	0	0	0		0					0	0	0	0		N/A					0	0	0	0		0					0	0	0	0		0
DH	1	Radiographic	Caries _ CEJ 2	SMB 4A	4	2 to 6	4 to 5	U	labial/buccal	whole skull	0	0	0	0		0					0	0	0	0		N/A					0	0	0	0		0					0	0	0	0		0
DH	1	Radiographic	Caries _ CEJ 3	SMB 4A	4	2 to 6	4 to 5	U	labial/buccal	whole skull	0	0	0	0		0					0	0	0	0		N/A					0	0	0	0		0					0	0	0	0		0
DH	1	Radiographic	Caries - Radiolucency	SMB 4A	4	2 to 6	4 to 5	U	labial/buccal	whole skull	0	0	0	0		0					0	0	0	0		N/A					0	0	0	0		0					0	0	0	0		0
JW	1	Radiographic	Alveolar status	SMB 4A	4	2 to 6	4 to 5	U	labial/buccal	whole skull
JW	1	Radiographic	Periodontal disease	SMB 4A	4	2 to 6	4 to 5	U	labial/buccal	whole skull
JW	1	Radiographic	Periodontal disease	SMB 4A	4	2 to 6	4 to 5	U	lingual	whole skull
JW	1	Radiographic	Enamel hypoplastic defect - present	SMB 4A	4	2 to 6	4 to 5	U	labial/buccal	whole skull
JW	1	Radiographic	Enamel hypoplastic defect - present	SMB 4A	4	2 to 6	4 to 5	U	lingual	whole skull
JW	1	Radiographic	Enamel hypoplastic defect - type -linear	SMB 4A	4	2 to 6	4 to 5	U	labial/buccal	whole skull
JW	1	Radiographic	Enamel hypoplastic defect - type -linear	SMB 4A	4	2 to 6	4 to 5	U	lingual	whole skull
JW	1	Radiographic	Enamel hypoplastic defects-number of lines	SMB 4A	4	2 to 6	4 to 5	U	labial/buccal	whole skull
JW	1	Radiographic	Enamel hypoplastic defects-number of lines	SMB 4A	4	2 to 6	4 to 5	U	lingual	whole skull
JW	1	Radiographic	Enamel hypoplastic defect - type - pits	SMB 4A	4	2 to 6	4 to 5	U	labial/buccal	whole skull
JW	1	Radiographic	Enamel hypoplastic defect - type - pits	SMB 4A	4	2 to 6	4 to 5	U	lingual	whole skull
JW	1	Radiographic	Enamel hypoplastic defects-number of pits	SMB 4A	4	2 to 6	4 to 5	U	labial/buccal	whole skull
JW	1	Radiographic	Enamel hypoplastic defects-number of pits	SMB 4A	4	2 to 6	4 to 5	U	lingual	whole skull
JW	1	Radiographic	Enamel hypoplastic defect - measurement 1 (mm)	SMB 4A	4	2 to 6	4 to 5	U	labial/buccal	whole skull
JW	1	Radiographic	Enamel hypoplastic defect - measurement 1 (mm)	SMB 4A	4	2 to 6	4 to 5	U	lingual	whole skull
JW	1	Radiographic	Enamel hypoplastic defect - measurement 2 (mm)	SMB 4A	4	2 to 6	4 to 5	U	labial/buccal	whole skull
JW	1	Radiographic	Enamel hypoplastic defect - measurement 2 (mm)	SMB 4A	4	2 to 6	4 to 5	U	lingual	whole skull
JW	1	Radiographic	Enamel hypoplastic defect - measurement 3 (mm)	SMB 4A	4	2 to 6	4 to 5	U	labial/buccal	whole skull
JW	1	Radiographic	Enamel hypoplastic defect - measurement 3 (mm)	SMB 4A	4	2 to 6	4 to 5	U	lingual	whole skull
JW	1	Radiographic	Enamel hypoplastic defect - measurement 4 (mm)	SMB 4A	4	2 to 6	4 to 5	U	labial/buccal	whole skull
JW	1	Radiographic	Enamel hypoplastic defect - measurement 4 (mm)	SMB 4A	4	2 to 6	4 to 5	U	lingual	whole skull
JW	1	Radiographic	IGD - present	SMB 4A	4	2 to 6	4 to 5	U	internal	whole skull
MM	1	L.v micro-CT	Inventory	SMB 4A	4	2 to 6	4.5	U	labial/buccal	whole skull	2	2	2	3		1					2	2	2	2		2					2	2	2	2		2					2	2	2	2		2
MM	1	L.v micro-CT	Tooth Wear	SMB 4A	4	2 to 6	4.5	U	occlusal	whole skull	1	1	1	1		1					1	1	1	1		0					2	1	1	1		1					3	2	2	2		2
MM	1	L.v micro-CT	Dental Trauma	SMB 4A	4	2 to 6	4.5	U	labial/buccal	whole skull	0	0	0	0		0					0	0	0	0		0					0	0	0	0		0					0	0	0	0		0
MM	1	L.v micro-CT	Dental Trauma	SMB 4A	4	2 to 6	4.5	U	lingual	whole skull	0	0	0	0		0					0	0	0	0		0					0	0	0	0		0					0	0	0	0		0
MM	1	L.v micro-CT	Occlusion	SMB 4A	4	2 to 6	4.5	U	occlusal	whole skull
MM	1	L.v micro-CT	Overbite	SMB 4A	4	2 to 6	4.5	U	occlusal	whole skull
MM	1	L.v micro-CT	Overjet	SMB 4A	4	2 to 6	4.5	U	occlusal	whole skull
MM	1	L.v micro-CT	Caries - present on tooth	SMB 4A	4	2 to 6	4.5	U	All	whole skull	0	0	0	0		0					0	0	0	0		0					0	0	0	0		0					0	0	0	0		0
MM	1	L.v micro-CT	Caries- location 1	SMB 4A	4	2 to 6	4.5	U	mesial	whole skull	0	0	0	0		0					0	0	0	0		0					0	0	0	0		0					0	0	0	0		0
MM	1	L.v micro-CT	Caries- location 2	SMB 4A	4	2 to 6	4.5	U	distal	whole skull	0	0	0	0		0					0	0	0	0		0					0	0	0	0		0					0	0	0	0		0
MM	1	L.v micro-CT	Caries- location 3	SMB 4A	4	2 to 6	4.5	U	occlusal	whole skull	0	0	0	0		0					0	0	0	0		0					0	0	0	0		0					0	0	0	0		0
MM	1	L.v micro-CT	Caries- location 4	SMB 4A	4	2 to 6	4.5	U	labial/buccal	whole skull	0	0	0	0		0					0	0	0	0		0					0	0	0	0		0					0	0	0	0		0
MM	1	L.v micro-CT	Caries- location 5	SMB 4A	4	2 to 6	4.5	U	lingual	whole skull	0	0	0	0		0					0	0	0	0		0					0	0	0	0		0					0	0	0	0		0
MM	1	L.v micro-CT	Caries _ CEJ 1	SMB 4A	4	2 to 6	4.5	U	labial/buccal	whole skull	0	0	0	0		0					0	0	0	0		0					0	0	0	0		0					0	0	0	0		0
MM	1	L.v micro-CT	Caries _ CEJ 2	SMB 4A	4	2 to 6	4.5	U	labial/buccal	whole skull	0	0	0	0		0					0	0	0	0		0					0	0	0	0		0					0	0	0	0		0
MM	1	L.v micro-CT	Caries _ CEJ 3	SMB 4A	4	2 to 6	4.5	U	labial/buccal	whole skull	0	0	0	0		0					0	0	0	0		0					0	0	0	0		0					0	0	0	0		0
MM	1	L.v micro-CT	Caries - Radiolucency	SMB 4A	4	2 to 6	4.5	U	labial/buccal	whole skull	0	0	0	0		0					0	0	0	0		0					0	0	0	0		0					0	0	0	0		0
MM	1	L.v micro-CT	Alveolar status	SMB 4A	4	2 to 6	4.5	U	labial/buccal	whole skull				1		1								1		1								1		1								1		1
MM	1	L.v micro-CT	Periodontal disease	SMB 4A	4	2 to 6	4.5	U	labial/buccal	whole skull	3.11	4.18	3.25	1.77		0					4.62	3.4	1.88	0.97		N/A					1.16	4.6	2.17	O.79		0.52					4.66	2.1	1.5	1		0.5
MM	1	L.v micro-CT	Periodontal disease	SMB 4A	4	2 to 6	4.5	U	lingual	whole skull	1.3	1.12	0	0		0					1.4	0	0	0		N/A					2.7	1.43	1.57	0.83		0.73					1.5	1	1	0.8		1
MM	1	L.v micro-CT	Enamel hypoplastic defect - present	SMB 4A	4	2 to 6	4.5	U	labial/buccal	whole skull	0	0	0	0		0					0	0	0	0		N/A					0	0	0	0		0					0	0	0	0		0
MM	1	L.v micro-CT	Enamel hypoplastic defect - present	SMB 4A	4	2 to 6	4.5	U	lingual	whole skull	0	0	0	0		0					0	0	0	0		N/A					0	0	0	0		0					0	0	0	0		0
MM	1	L.v micro-CT	Enamel hypoplastic defect - type -linear	SMB 4A	4	2 to 6	4.5	U	labial/buccal	whole skull	0	0	0	0		0					0	0	0	0		N/A					0	0	0	0		0					0	0	0	0		0
MM	1	L.v micro-CT	Enamel hypoplastic defect - type -linear	SMB 4A	4	2 to 6	4.5	U	lingual	whole skull	0	0	0	0		0					0	0	0	0		N/A					0	0	0	0		0					0	0	0	0		0
MM	1	L.v micro-CT	Enamel hypoplastic defects-number of lines	SMB 4A	4	2 to 6	4.5	U	labial/buccal	whole skull	0	0	0	0		0					0	0	0	0		N/A					0	0	0	0		0					0	0	0	0		0
MM	1	L.v micro-CT	Enamel hypoplastic defects-number of lines	SMB 4A	4	2 to 6	4.5	U	lingual	whole skull	0	0	0	0		0					0	0	0	0		N/A					0	0	0	0		0					0	0	0	0		0
MM	1	L.v micro-CT	Enamel hypoplastic defect - type - pits	SMB 4A	4	2 to 6	4.5	U	labial/buccal	whole skull	0	0	0	0		0					0	0	0	0		N/A					0	0	0	0		0					0	0	0	0		0
MM	1	L.v micro-CT	Enamel hypoplastic defect - type - pits	SMB 4A	4	2 to 6	4.5	U	lingual	whole skull	0	0	0	0		0					0	0	0	0		N/A					0	0	0	0		0					0	0	0	0		0
MM	1	L.v micro-CT	Enamel hypoplastic defects-number of pits	SMB 4A	4	2 to 6	4.5	U	labial/buccal	whole skull	0	0	0	0		0					0	0	0	0		N/A					0	0	0	0		0					0	0	0	0		0
MM	1	L.v micro-CT	Enamel hypoplastic defects-number of pits	SMB 4A	4	2 to 6	4.5	U	lingual	whole skull	0	0	0	0		0					0	0	0	0		N/A					0	0	0	0		0					0	0	0	0		0
MM	1	L.v micro-CT	Enamel hypoplastic defect - measurement 1 (mm)	SMB 4A	4	2 to 6	4.5	U	labial/buccal	whole skull	0	0	0	0		0					0	0	0	0		N/A					0	0	0	0		0					0	0	0	0		0
MM	1	L.v micro-CT	Enamel hypoplastic defect - measurement 1 (mm)	SMB 4A	4	2 to 6	4.5	U	lingual	whole skull	0	0	0	0		0					0	0	0	0		N/A					0	0	0	0		0					0	0	0	0		0
MM	1	L.v micro-CT	Enamel hypoplastic defect - measurement 2 (mm)	SMB 4A	4	2 to 6	4.5	U	labial/buccal	whole skull	0	0	0	0		0					0	0	0	0		N/A					0	0	0	0		0					0	0	0	0		0
MM	1	L.v micro-CT	Enamel hypoplastic defect - measurement 2 (mm)	SMB 4A	4	2 to 6	4.5	U	lingual	whole skull	0	0	0	0		0					0	0	0	0		N/A					0	0	0	0		0					0	0	0	0		0
MM	1	L.v micro-CT	Enamel hypoplastic defect - measurement 3 (mm)	SMB 4A	4	2 to 6	4.5	U	labial/buccal	whole skull	0	0	0	0		0					0	0	0	0		N/A					0	0	0	0		0					0	0	0	0		0
MM	1	L.v micro-CT	Enamel hypoplastic defect - measurement 3 (mm)	SMB 4A	4	2 to 6	4.5	U	lingual	whole skull	0	0	0	0		0					0	0	0	0		N/A					0	0	0	0		0					0	0	0	0		0
MM	1	L.v micro-CT	Enamel hypoplastic defect - measurement 4 (mm)	SMB 4A	4	2 to 6	4.5	U	labial/buccal	whole skull	0	0	0	0		0					0	0	0	0		N/A					0	0	0	0		0					0	0	0	0		0
MM	1	L.v micro-CT	Enamel hypoplastic defect - measurement 4 (mm)	SMB 4A	4	2 to 6	4.5	U	lingual	whole skull	0	0	0	0		0					0	0	0	0		N/A					0	0	0	0		0					0	0	0	0		0
MM	1	L.v micro-CT	IGD - present	SMB 4A	4	2 to 6	4.5	U	internal	whole skull	0	0	0	0		0					0	0	0	0		N/A					0	0	0	0		0					0	0	0	0		0
MM	1	S.v micro-CT	Inventory	SMB 4A	4	2 to 6		U	labial/buccal	Individual tooth samples
MM	1	S.v micro-CT	Tooth Wear	SMB 4A	4	2 to 6		U	occlusal	Individual tooth samples		2	2								2							1
MM	1	S.v micro-CT	Dental Trauma	SMB 4A	4	2 to 6		U	labial/buccal	Individual tooth samples		0	3								3							3
MM	1	S.v micro-CT	Dental Trauma	SMB 4A	4	2 to 6		U	lingual	Individual tooth samples		0	3								3							3
MM	1	S.v micro-CT	Occlusion	SMB 4A	4	2 to 6		U	occlusal	Individual tooth samples
MM	1	S.v micro-CT	Overbite	SMB 4A	4	2 to 6		U	occlusal	Individual tooth samples
MM	1	S.v micro-CT	Overjet	SMB 4A	4	2 to 6		U	occlusal	Individual tooth samples
MM	1	S.v micro-CT	Caries - present on tooth	SMB 4A	4	2 to 6		U	All	Individual tooth samples		0	0								0							0
MM	1	S.v micro-CT	Caries- location 1	SMB 4A	4	2 to 6		U	mesial	Individual tooth samples		0	0								0							0
MM	1	S.v micro-CT	Caries- location 2	SMB 4A	4	2 to 6		U	distal	Individual tooth samples		0	0								0							0
MM	1	S.v micro-CT	Caries- location 3	SMB 4A	4	2 to 6		U	occlusal	Individual tooth samples		0	0								0							0
MM	1	S.v micro-CT	Caries- location 4	SMB 4A	4	2 to 6		U	labial/buccal	Individual tooth samples		0	0								0							0
MM	1	S.v micro-CT	Caries- location 5	SMB 4A	4	2 to 6		U	lingual	Individual tooth samples		0	0								0							0
MM	1	S.v micro-CT	Caries _ CEJ 1	SMB 4A	4	2 to 6		U	labial/buccal	Individual tooth samples		0	0								0							0
MM	1	S.v micro-CT	Caries _ CEJ 2	SMB 4A	4	2 to 6		U	labial/buccal	Individual tooth samples		0	0								0							0
MM	1	S.v micro-CT	Caries _ CEJ 3	SMB 4A	4	2 to 6		U	labial/buccal	Individual tooth samples		0	0								0							0
MM	1	S.v micro-CT	Caries - Radiolucency	SMB 4A	4	2 to 6		U	labial/buccal	Individual tooth samples		0	0								0							0
MM	1	S.v micro-CT	Alveolar status	SMB 4A	4	2 to 6		U	labial/buccal	Individual tooth samples
MM	1	S.v micro-CT	Periodontal disease	SMB 4A	4	2 to 6		U	labial/buccal	Individual tooth samples
MM	1	S.v micro-CT	Periodontal disease	SMB 4A	4	2 to 6		U	labial/buccal	Individual tooth samples
MM	1	S.v micro-CT	Enamel hypoplastic defect - present	SMB 4A	4	2 to 6		U	labial/buccal	Individual tooth samples		1	0								0							0
MM	1	S.v micro-CT	Enamel hypoplastic defect - present	SMB 4A	4	2 to 6		U	lingual	Individual tooth samples		0	0								0							0
MM	1	S.v micro-CT	Enamel hypoplastic defect - type -linear	SMB 4A	4	2 to 6		U	labial/buccal	Individual tooth samples		2	0								0							0
MM	1	S.v micro-CT	Enamel hypoplastic defect - type -linear	SMB 4A	4	2 to 6		U	lingual	Individual tooth samples		0	0								0							0
MM	1	S.v micro-CT	Enamel hypoplastic defects-number of lines	SMB 4A	4	2 to 6		U	labial/buccal	Individual tooth samples		0	0								0							0
MM	1	S.v micro-CT	Enamel hypoplastic defects-number of lines	SMB 4A	4	2 to 6		U	lingual	Individual tooth samples		0	0								0							0
MM	1	S.v micro-CT	Enamel hypoplastic defect - type - pits	SMB 4A	4	2 to 6		U	labial/buccal	Individual tooth samples		1	0								0							0
MM	1	S.v micro-CT	Enamel hypoplastic defect - type - pits	SMB 4A	4	2 to 6		U	lingual	Individual tooth samples		0	0								0							0
MM	1	S.v micro-CT	Enamel hypoplastic defects-number of pits	SMB 4A	4	2 to 6		U	labial/buccal	Individual tooth samples		3	0								0							0
MM	1	S.v micro-CT	Enamel hypoplastic defects-number of pits	SMB 4A	4	2 to 6		U	lingual	Individual tooth samples		0	0								0							0
MM	1	S.v micro-CT	Enamel hypoplastic defect - measurement 1 (mm)	SMB 4A	4	2 to 6		U	labial/buccal	Individual tooth samples		1.5	0								0							0
MM	1	S.v micro-CT	Enamel hypoplastic defect - measurement 1 (mm)	SMB 4A	4	2 to 6		U	lingual	Individual tooth samples		0	0								0							0
MM	1	S.v micro-CT	Enamel hypoplastic defect - measurement 2 (mm)	SMB 4A	4	2 to 6		U	labial/buccal	Individual tooth samples		2.2	0								0							0
MM	1	S.v micro-CT	Enamel hypoplastic defect - measurement 2 (mm)	SMB 4A	4	2 to 6		U	lingual	Individual tooth samples		0	0								0							0
MM	1	S.v micro-CT	Enamel hypoplastic defect - measurement 3 (mm)	SMB 4A	4	2 to 6		U	labial/buccal	Individual tooth samples		4.6	0								0							0
MM	1	S.v micro-CT	Enamel hypoplastic defect - measurement 3 (mm)	SMB 4A	4	2 to 6		U	lingual	Individual tooth samples		0	0								0							0
MM	1	S.v micro-CT	Enamel hypoplastic defect - measurement 4 (mm)	SMB 4A	4	2 to 6		U	labial/buccal	Individual tooth samples		0	0								0							0
MM	1	S.v micro-CT	Enamel hypoplastic defect - measurement 4 (mm)	SMB 4A	4	2 to 6		U	lingual	Individual tooth samples		0	0								0							0
MM	1	S.v micro-CT	IGD - present	SMB 4A	4	2 to 6		U	internal	Individual tooth samples		0	0								0							0
AG	1	Macro	Inventory	SMB 82	1.5	0 to 4	1 to 1.5	U	labial/buccal	whole skull	2	2	4	4		1					2	2	4	4		1					2	4	4	2		1		1			2	4	1	2		1		1
AG	1	Macro	Tooth Wear	SMB 82	1.5	0 to 4	1 to 1.5	U	occlusal	whole skull	1	1	0	1		1					1	1	0	0		0					1	0	N/A	1		1					1	0	0	1		1
AG	1	Macro	Dental Trauma	SMB 82	1.5	0 to 4	1 to 1.5	U	labial/buccal	whole skull	0	0	0	0		N/A					1	0	N/A	0		0					3	N/A	N/A	0		0								3
AG	1	Macro	Dental Trauma	SMB 82	1.5	0 to 4	1 to 1.5	U	lingual	whole skull	0	0	0	0		N/A					0	0	N/A	0		0					3	N/A	N/A	0		0								3
AG	1	Macro	Occlusion	SMB 82	1.5	0 to 4	1 to 1.5	U	occlusal	whole skull
AG	1	Macro	Overbite	SMB 82	1.5	0 to 4	1 to 1.5	U	labial/buccal	whole skull
AG	1	Macro	Overjet	SMB 82	1.5	0 to 4	1 to 1.5	U	labial/buccal	whole skull
AG	1	Macro	Caries - present on tooth	SMB 82	1.5	0 to 4	1 to 1.5	U	All	whole skull	0	0	N/A	0		0					0	0	N/A	N/A		0					0	N/A	N/A	0		0					0	N/A	N/A	0		0
AG	1	Macro	Caries- location 1	SMB 82	1.5	0 to 4	1 to 1.5	U	mesial	whole skull	0	0	N/A	0		0					0	0	N/A	N/A		0					0	N/A	N/A	0		0					0	N/A	N/A	0		0
AG	1	Macro	Caries- location 2	SMB 82	1.5	0 to 4	1 to 1.5	U	distal	whole skull	0	0	N/A	0		0					0	0	N/A	N/A		0					0	N/A	N/A	0		0					0	N/A	N/A	0		0
AG	1	Macro	Caries- location 3	SMB 82	1.5	0 to 4	1 to 1.5	U	occlusal	whole skull	0	0	N/A	0		0					0	0	N/A	N/A		0					0	N/A	N/A	0		0					0	N/A	N/A	0		0
AG	1	Macro	Caries- location 4	SMB 82	1.5	0 to 4	1 to 1.5	U	labial/buccal	whole skull	0	0	N/A	0		0					0	0	N/A	N/A		0					0	N/A	N/A	0		0					0	N/A	N/A	0		0
AG	1	Macro	Caries- location 5	SMB 82	1.5	0 to 4	1 to 1.5	U	lingual	whole skull	0	0	N/A	0		0					0	0	N/A	N/A		0					0	N/A	N/A	0		0					0	N/A	N/A	0		0
AG	1	Macro	Caries _ CEJ 1	SMB 82	1.5	0 to 4	1 to 1.5	U	labial/buccal	whole skull	0	0	N/A	0		0					0	0	N/A	N/A		0					0	N/A	N/A	0		0					0	N/A	N/A	0		0
AG	1	Macro	Caries _ CEJ 2	SMB 82	1.5	0 to 4	1 to 1.5	U	labial/buccal	whole skull	0	0	N/A	0		0					0	0	N/A	N/A		0					0	N/A	N/A	0		0					0	N/A	N/A	0		0
AG	1	Macro	Caries _ CEJ 3	SMB 82	1.5	0 to 4	1 to 1.5	U	labial/buccal	whole skull	0	0	N/A	0		0					0	0	N/A	N/A		0					0	N/A	N/A	0		0					0	N/A	N/A	0		0
AG	1	Macro	Caries - Radiolucency	SMB 82	1.5	0 to 4	1 to 1.5	U	labial/buccal	whole skull
AG	1	Macro	Alveolar status	SMB 82	1.5	0 to 4	1 to 1.5	U	labial/buccal	whole skull				0		0								1		0								1		1								1		1
AG	1	Macro	Periodontal disease	SMB 82	1.5	0 to 4	1 to 1.5	U	labial/buccal	whole skull	1	1	N/A	2		0					1	1	N/A	N/A		N/A					1.5	N/A	0	0		N/A					1	N/A	N/A	0		N/A
AG	1	Macro	Periodontal disease	SMB 82	1.5	0 to 4	1 to 1.5	U	lingual	whole skull	0	0	N/A	1		0					0	0	N/A	N/A		N/A					0	N/A	0	0		N/A					0	N/A	N/A	0		N/A
AG	1	Macro	Enamel hypoplastic defect - present	SMB 82	1.5	0 to 4	1 to 1.5	U	labial/buccal	whole skull	0	0	N/A	N/A		0					0	0	N/A	N/A		N/A					0	N/A	N/A	0		N/A					0	N/A	N/A	0		N/A
AG	1	Macro	Enamel hypoplastic defect - present	SMB 82	1.5	0 to 4	1 to 1.5	U	lingual	whole skull	0	0	N/A	N/A		0					0	0	N/A	N/A		N/A					0	N/A	N/A	0		N/A					0	N/A	N/A	0		N/A
AG	1	Macro	Enamel hypoplastic defect - type -linear	SMB 82	1.5	0 to 4	1 to 1.5	U	labial/buccal	whole skull	0	0	N/A	N/A		0					0	0	N/A	N/A		N/A					0	N/A	N/A	0		N/A					0	N/A	N/A	0		N/A
AG	1	Macro	Enamel hypoplastic defect - type -linear	SMB 82	1.5	0 to 4	1 to 1.5	U	lingual	whole skull	0	0	N/A	N/A		0					0	0	N/A	N/A		N/A					0	N/A	N/A	0		N/A					0	N/A	N/A	0		N/A
AG	1	Macro	Enamel hypoplastic defects-number of lines	SMB 82	1.5	0 to 4	1 to 1.5	U	labial/buccal	whole skull	0	0	N/A	N/A		0					0	0	N/A	N/A		N/A					0	N/A	N/A	0		N/A					0	N/A	N/A	0		N/A
AG	1	Macro	Enamel hypoplastic defects-number of lines	SMB 82	1.5	0 to 4	1 to 1.5	U	lingual	whole skull	0	0	N/A	N/A		0					0	0	N/A	N/A		N/A					0	N/A	N/A	0		N/A					0	N/A	N/A	0		N/A
AG	1	Macro	Enamel hypoplastic defect - type - pits	SMB 82	1.5	0 to 4	1 to 1.5	U	labial/buccal	whole skull	0	0	N/A	N/A		0					0	0	N/A	N/A		N/A					0	N/A	N/A	0		N/A					0	N/A	N/A	0		N/A
AG	1	Macro	Enamel hypoplastic defect - type - pits	SMB 82	1.5	0 to 4	1 to 1.5	U	lingual	whole skull	0	0	N/A	N/A		0					0	0	N/A	N/A		N/A					0	N/A	N/A	0		N/A					0	N/A	N/A	0		N/A
AG	1	Macro	Enamel hypoplastic defects-number of pits	SMB 82	1.5	0 to 4	1 to 1.5	U	labial/buccal	whole skull	0	0	N/A	N/A		0					0	0	N/A	N/A		N/A					0	N/A	N/A	0		N/A					0	N/A	N/A	0		N/A
AG	1	Macro	Enamel hypoplastic defects-number of pits	SMB 82	1.5	0 to 4	1 to 1.5	U	lingual	whole skull	0	0	N/A	N/A		0					0	0	N/A	N/A		N/A					0	N/A	N/A	0		N/A					0	N/A	N/A	0		N/A
AG	1	Macro	Enamel hypoplastic defect - measurement 1 (mm)	SMB 82	1.5	0 to 4	1 to 1.5	U	labial/buccal	whole skull	0	0	N/A	N/A		0					0	0	N/A	N/A		N/A					0	N/A	N/A	0		N/A					0	N/A	N/A	0		N/A
AG	1	Macro	Enamel hypoplastic defect - measurement 1 (mm)	SMB 82	1.5	0 to 4	1 to 1.5	U	lingual	whole skull	0	0	N/A	N/A		0					0	0	N/A	N/A		N/A					0	N/A	N/A	0		N/A					0	N/A	N/A	0		N/A
AG	1	Macro	Enamel hypoplastic defect - measurement 2 (mm)	SMB 82	1.5	0 to 4	1 to 1.5	U	labial/buccal	whole skull	0	0	N/A	N/A		0					0	0	N/A	N/A		N/A					0	N/A	N/A	0		N/A					0	N/A	N/A	0		N/A
AG	1	Macro	Enamel hypoplastic defect - measurement 2 (mm)	SMB 82	1.5	0 to 4	1 to 1.5	U	lingual	whole skull	0	0	N/A	N/A		0					0	0	N/A	N/A		N/A					0	N/A	N/A	0		N/A					0	N/A	N/A	0		N/A
AG	1	Macro	Enamel hypoplastic defect - measurement 3 (mm)	SMB 82	1.5	0 to 4	1 to 1.5	U	labial/buccal	whole skull	0	0	N/A	N/A		0					0	0	N/A	N/A		N/A					0	N/A	N/A	0		N/A					0	N/A	N/A	0		N/A
AG	1	Macro	Enamel hypoplastic defect - measurement 3 (mm)	SMB 82	1.5	0 to 4	1 to 1.5	U	lingual	whole skull	0	0	N/A	N/A		0					0	0	N/A	N/A		N/A					0	N/A	N/A	0		N/A					0	N/A	N/A	0		N/A
AG	1	Macro	Enamel hypoplastic defect - measurement 4 (mm)	SMB 82	1.5	0 to 4	1 to 1.5	U	labial/buccal	whole skull	0	0	N/A	N/A		0					0	0	N/A	N/A		N/A					0	N/A	N/A	0		N/A					0	N/A	N/A	0		N/A
AG	1	Macro	Enamel hypoplastic defect - measurement 4 (mm)	SMB 82	1.5	0 to 4	1 to 1.5	U	lingual	whole skull	0	0	N/A	N/A		0					0	0	N/A	N/A		N/A					0	N/A	N/A	0		N/A					0	N/A	N/A	0		N/A
AG	1	Macro	IGD - present	SMB 82	1.5	0 to 4	1 to 1.5	U	internal	whole skull
AG	1	Radiographic	Inventory	SMB 82	1.5	0 to 4	0.11 to 2	U	labial/buccal	whole skull	2	2	4	4		1					2	2	4	4		1					2	4	4	2		1		1			2	4	1	2		1		1
AG	1	Radiographic	Tooth Wear	SMB 82	1.5	0 to 4	0.11 to 2	U	occlusal	whole skull	2	2	N/A	N/A		N/A					2	2	N/A	N/A		N/A					2	N/A	N/A	2		N/A					2	N/A	N/A	2		N/A
AG	1	Radiographic	Dental Trauma	SMB 82	1.5	0 to 4	0.11 to 2	U	labial/buccal	whole skull	0	0	N/A	N/A		N/A					0	0	N/A	N/A		N/A					0	N/A	N/A	0		N/A					0	N/A	N/A	0		N/A
AG	1	Radiographic	Dental Trauma	SMB 82	1.5	0 to 4	0.11 to 2	U	lingual	whole skull	0	0	N/A	N/A		N/A					0	0	N/A	N/A		N/A					0	N/A	N/A	0		N/A					0	N/A	N/A	0		N/A
AG	1	Radiographic	Occlusion	SMB 82	1.5	0 to 4	0.11 to 2	U	Occlusal	whole skull
AG	1	Radiographic	Overbite	SMB 82	1.5	0 to 4	0.11 to 2	U	occlusal	whole skull
AG	1	Radiographic	Overjet	SMB 82	1.5	0 to 4	0.11 to 2	U	occlusal	whole skull
AG	1	Radiographic	Caries - present on tooth	SMB 82	1.5	0 to 4	0.11 to 2	U	All	whole skull	0	0	N/A	N/A		N/A					0	0	N/A	N/A		N/A					0	N/A	N/A	0		N/A					0	N/A	N/A	0		N/A
AG	1	Radiographic	Caries- location 1	SMB 82	1.5	0 to 4	0.11 to 2	U	mesial	whole skull	0	0	N/A	N/A		N/A					0	0	N/A	N/A		N/A					0	N/A	N/A	0		N/A					0	N/A	N/A	0		N/A
AG	1	Radiographic	Caries- location 2	SMB 82	1.5	0 to 4	0.11 to 2	U	distal	whole skull	0	0	N/A	N/A		N/A					0	0	N/A	N/A		N/A					0	N/A	N/A	0		N/A					0	N/A	N/A	0		N/A
AG	1	Radiographic	Caries- location 3	SMB 82	1.5	0 to 4	0.11 to 2	U	occlusal	whole skull	0	0	N/A	N/A		N/A					0	0	N/A	N/A		N/A					0	N/A	N/A	0		N/A					0	N/A	N/A	0		N/A
AG	1	Radiographic	Caries- location 4	SMB 82	1.5	0 to 4	0.11 to 2	U	labial/buccal	whole skull	0	0	N/A	N/A		N/A					0	0	N/A	N/A		N/A					0	N/A	N/A	0		N/A					0	N/A	N/A	0		N/A
AG	1	Radiographic	Caries- location 5	SMB 82	1.5	0 to 4	0.11 to 2	U	lingual	whole skull	0	0	N/A	N/A		N/A					0	0	N/A	N/A		N/A					0	N/A	N/A	0		N/A					0	N/A	N/A	0		N/A
AG	1	Radiographic	Caries _ CEJ 1	SMB 82	1.5	0 to 4	0.11 to 2	U	labial/buccal	whole skull	0	0	N/A	N/A		N/A					0	0	N/A	N/A		N/A					0	N/A	N/A	0		N/A					0	N/A	N/A	0		N/A
AG	1	Radiographic	Caries _ CEJ 2	SMB 82	1.5	0 to 4	0.11 to 2	U	labial/buccal	whole skull	0	0	N/A	N/A		N/A					0	0	N/A	N/A		N/A					0	N/A	N/A	0		N/A					0	N/A	N/A	0		N/A
AG	1	Radiographic	Caries _ CEJ 3	SMB 82	1.5	0 to 4	0.11 to 2	U	labial/buccal	whole skull	0	0	N/A	N/A		N/A					0	0	N/A	N/A		N/A					0	N/A	N/A	0		N/A					0	N/A	N/A	0		N/A
AG	1	Radiographic	Caries - Radiolucency	SMB 82	1.5	0 to 4	0.11 to 2	U	labial/buccal	whole skull	0	0	N/A	N/A		N/A					0	0	N/A	N/A		N/A					0	N/A	N/A	0		N/A					0	N/A	N/A	0		N/A
AG	1	Radiographic	Alveolar status	SMB 82	1.5	0 to 4	0.11 to 2	U	labial/buccal	whole skull
AG	1	Radiographic	Periodontal disease	SMB 82	1.5	0 to 4	0.11 to 2	U	labial/buccal	whole skull
AG	1	Radiographic	Periodontal disease	SMB 82	1.5	0 to 4	0.11 to 2	U	lingual	whole skull
AG	1	Radiographic	Enamel hypoplastic defect - present	SMB 82	1.5	0 to 4	0.11 to 2	U	labial/buccal	whole skull
AG	1	Radiographic	Enamel hypoplastic defect - present	SMB 82	1.5	0 to 4	0.11 to 2	U	lingual	whole skull
AG	1	Radiographic	Enamel hypoplastic defect - type -linear	SMB 82	1.5	0 to 4	0.11 to 2	U	labial/buccal	whole skull
AG	1	Radiographic	Enamel hypoplastic defect - type -linear	SMB 82	1.5	0 to 4	0.11 to 2	U	lingual	whole skull
AG	1	Radiographic	Enamel hypoplastic defects-number of lines	SMB 82	1.5	0 to 4	0.11 to 2	U	labial/buccal	whole skull
AG	1	Radiographic	Enamel hypoplastic defects-number of lines	SMB 82	1.5	0 to 4	0.11 to 2	U	lingual	whole skull
AG	1	Radiographic	Enamel hypoplastic defect - type - pits	SMB 82	1.5	0 to 4	0.11 to 2	U	labial/buccal	whole skull
AG	1	Radiographic	Enamel hypoplastic defect - type - pits	SMB 82	1.5	0 to 4	0.11 to 2	U	lingual	whole skull
AG	1	Radiographic	Enamel hypoplastic defects-number of pits	SMB 82	1.5	0 to 4	0.11 to 2	U	labial/buccal	whole skull
AG	1	Radiographic	Enamel hypoplastic defects-number of pits	SMB 82	1.5	0 to 4	0.11 to 2	U	lingual	whole skull
AG	1	Radiographic	Enamel hypoplastic defect - measurement 1 (mm)	SMB 82	1.5	0 to 4	0.11 to 2	U	labial/buccal	whole skull
AG	1	Radiographic	Enamel hypoplastic defect - measurement 1 (mm)	SMB 82	1.5	0 to 4	0.11 to 2	U	lingual	whole skull
AG	1	Radiographic	Enamel hypoplastic defect - measurement 2 (mm)	SMB 82	1.5	0 to 4	0.11 to 2	U	labial/buccal	whole skull
AG	1	Radiographic	Enamel hypoplastic defect - measurement 2 (mm)	SMB 82	1.5	0 to 4	0.11 to 2	U	lingual	whole skull
AG	1	Radiographic	Enamel hypoplastic defect - measurement 3 (mm)	SMB 82	1.5	0 to 4	0.11 to 2	U	labial/buccal	whole skull
AG	1	Radiographic	Enamel hypoplastic defect - measurement 3 (mm)	SMB 82	1.5	0 to 4	0.11 to 2	U	lingual	whole skull
AG	1	Radiographic	Enamel hypoplastic defect - measurement 4 (mm)	SMB 82	1.5	0 to 4	0.11 to 2	U	labial/buccal	whole skull
AG	1	Radiographic	Enamel hypoplastic defect - measurement 4 (mm)	SMB 82	1.5	0 to 4	0.11 to 2	U	lingual	whole skull
AG	1	Radiographic	IGD - present	SMB 82	1.5	0 to 4	0.11 to 2	U	internal	whole skull
AG	1	L.v micro-CT	Inventory	SMB 82	1.5	0 to 4	0.11 to 2	U	labial/buccal	whole skull	2	2	4	4		1					2	2	4	4		1					2	4	4	2		1					2	4	1	2		1
AG	1	L.v micro-CT	Tooth Wear	SMB 82	1.5	0 to 4	0.11 to 1.5	U	occlusal	whole skull	1	1	0	0		1					1	1	0	0		1					2	2	N/A	2		0					2	2	0	2		2
AG	1	L.v micro-CT	Dental Trauma	SMB 82	1.5	0 to 4	0.11 to 1.5	U	labial/buccal	whole skull	0	0	N/A	N/A		N/A					0	0	N/A	N/A		N/A					0	N/A	N/A	0		N/A					0	N/A	N/A	0		N/A
AG	1	L.v micro-CT	Dental Trauma	SMB 82	1.5	0 to 4	0.11 to 1.5	U	lingual	whole skull	0	0	N/A	N/A		N/A					0	0	N/A	N/A		N/A					0	N/A	N/A	0		N/A					0	N/A	N/A	0		N/A
AG	1	L.v micro-CT	Occlusion	SMB 82	1.5	0 to 4	0.11 to 1.5	U	occlusal	whole skull
AG	1	L.v micro-CT	Overbite	SMB 82	1.5	0 to 4	0.11 to 1.5	U	occlusal	whole skull
AG	1	L.v micro-CT	Overjet	SMB 82	1.5	0 to 4	0.11 to 1.5	U	occlusal	whole skull
AG	1	L.v micro-CT	Caries - present on tooth	SMB 82	1.5	0 to 4	0.11 to 1.5	U	All	whole skull	0	0	N/A	N/A		N/A					0	0	N/A	N/A		N/A					0	0	N/A	N/A		N/A					0	N/A	N/A	0		N/A
AG	1	L.v micro-CT	Caries- location 1	SMB 82	1.5	0 to 4	0.11 to 1.5	U	mesial	whole skull	0	0	N/A	N/A		N/A					0	0	N/A	N/A		N/A					0	0	N/A	N/A		N/A					0	N/A	N/A	0		N/A
AG	1	L.v micro-CT	Caries- location 2	SMB 82	1.5	0 to 4	0.11 to 1.5	U	distal	whole skull	0	0	N/A	N/A		N/A					0	0	N/A	N/A		N/A					0	0	N/A	N/A		N/A					0	N/A	N/A	0		N/A
AG	1	L.v micro-CT	Caries- location 3	SMB 82	1.5	0 to 4	0.11 to 1.5	U	occlusal	whole skull	0	0	N/A	N/A		N/A					0	0	N/A	N/A		N/A					0	0	N/A	N/A		N/A					0	N/A	N/A	0		N/A
AG	1	L.v micro-CT	Caries- location 4	SMB 82	1.5	0 to 4	0.11 to 1.5	U	labial/buccal	whole skull	0	0	N/A	N/A		N/A					0	0	N/A	N/A		N/A					0	0	N/A	N/A		N/A					0	N/A	N/A	0		N/A
AG	1	L.v micro-CT	Caries- location 5	SMB 82	1.5	0 to 4	0.11 to 1.5	U	lingual	whole skull	0	0	N/A	N/A		N/A					0	0	N/A	N/A		N/A					0	0	N/A	N/A		N/A					0	N/A	N/A	0		N/A
AG	1	L.v micro-CT	Caries _ CEJ 1	SMB 82	1.5	0 to 4	0.11 to 1.5	U	labial/buccal	whole skull	0	0	N/A	N/A		N/A					0	0	N/A	N/A		N/A					0	0	N/A	N/A		N/A					0	N/A	N/A	0		N/A
AG	1	L.v micro-CT	Caries _ CEJ 2	SMB 82	1.5	0 to 4	0.11 to 1.5	U	labial/buccal	whole skull	0	0	N/A	N/A		N/A					0	0	N/A	N/A		N/A					0	0	N/A	N/A		N/A					0	N/A	N/A	0		N/A
AG	1	L.v micro-CT	Caries _ CEJ 3	SMB 82	1.5	0 to 4	0.11 to 1.5	U	labial/buccal	whole skull	0	0	N/A	N/A		N/A					0	0	N/A	N/A		N/A					0	0	N/A	N/A		N/A					0	N/A	N/A	0		N/A
AG	1	L.v micro-CT	Caries - Radiolucency	SMB 82	1.5	0 to 4	0.11 to 1.5	U	labial/buccal	whole skull	0	0	N/A	N/A		N/A					0	0	N/A	N/A		N/A					0	0	N/A	N/A		N/A					0	N/A	N/A	0		N/A
AG	1	L.v micro-CT	Alveolar status	SMB 82	1.5	0 to 4	0.11 to 1.5	U	labial/buccal	whole skull				0		0								0		0								0		0								0		0
AG	1	L.v micro-CT	Periodontal disease	SMB 82	1.5	0 to 4	0.11 to 1.5	U	labial/buccal	whole skull	2.23	1.6	N/A	N/A		N/A					1.8	2.3	N/A	N/A		N/A					2.66	N/A	N/A	0		N/A					1.48	N/A	N/A	0		N/A
AG	1	L.v micro-CT	Periodontal disease	SMB 82	1.5	0 to 4	0.11 to 1.5	U	lingual	whole skull	0	0	N/A	N/A		N/A					0	0	N/A	N/A		N/A					0	N/A	N/A	0		N/A					0.53	N/A	N/A	0		N/A
AG	1	L.v micro-CT	Enamel hypoplastic defect - present	SMB 82	1.5	0 to 4	0.11 to 1.5	U	labial/buccal	whole skull	0	0	N/A	N/A		N/A					0	0	N/A	N/A		N/A					0	N/A	N/A	0		N/A					0	N/A	N/A	0		N/A
AG	1	L.v micro-CT	Enamel hypoplastic defect - present	SMB 82	1.5	0 to 4	0.11 to 1.5	U	lingual	whole skull	0	0	N/A	N/A		N/A					0	0	N/A	N/A		N/A					0	N/A	N/A	0		N/A					0	N/A	N/A	0		N/A
AG	1	L.v micro-CT	Enamel hypoplastic defect - type -linear	SMB 82	1.5	0 to 4	0.11 to 1.5	U	labial/buccal	whole skull	0	0	N/A	N/A		N/A					0	0	N/A	N/A		N/A					0	N/A	N/A	0		N/A					0	N/A	N/A	0		N/A
AG	1	L.v micro-CT	Enamel hypoplastic defect - type -linear	SMB 82	1.5	0 to 4	0.11 to 1.5	U	lingual	whole skull	0	0	N/A	N/A		N/A					0	0	N/A	N/A		N/A					0	N/A	N/A	0		N/A					0	N/A	N/A	0		N/A
AG	1	L.v micro-CT	Enamel hypoplastic defects-number of lines	SMB 82	1.5	0 to 4	0.11 to 1.5	U	labial/buccal	whole skull	0	0	N/A	N/A		N/A					0	0	N/A	N/A		N/A					0	N/A	N/A	0		N/A					0	N/A	N/A	0		N/A
AG	1	L.v micro-CT	Enamel hypoplastic defects-number of lines	SMB 82	1.5	0 to 4	0.11 to 1.5	U	lingual	whole skull	0	0	N/A	N/A		N/A					0	0	N/A	N/A		N/A					0	N/A	N/A	0		N/A					0	N/A	N/A	0		N/A
AG	1	L.v micro-CT	Enamel hypoplastic defect - type - pits	SMB 82	1.5	0 to 4	0.11 to 1.5	U	labial/buccal	whole skull	0	0	N/A	N/A		N/A					0	0	N/A	N/A		N/A					0	N/A	N/A	0		N/A					0	N/A	N/A	0		N/A
AG	1	L.v micro-CT	Enamel hypoplastic defect - type - pits	SMB 82	1.5	0 to 4	0.11 to 1.5	U	lingual	whole skull	0	0	N/A	N/A		N/A					0	0	N/A	N/A		N/A					0	N/A	N/A	0		N/A					0	N/A	N/A	0		N/A
AG	1	L.v micro-CT	Enamel hypoplastic defects-number of pits	SMB 82	1.5	0 to 4	0.11 to 1.5	U	labial/buccal	whole skull	0	0	N/A	N/A		N/A					0	0	N/A	N/A		N/A					0	N/A	N/A	0		N/A					0	N/A	N/A	0		N/A
AG	1	L.v micro-CT	Enamel hypoplastic defects-number of pits	SMB 82	1.5	0 to 4	0.11 to 1.5	U	lingual	whole skull	0	0	N/A	N/A		N/A					0	0	N/A	N/A		N/A					0	N/A	N/A	0		N/A					0	N/A	N/A	0		N/A
AG	1	L.v micro-CT	Enamel hypoplastic defect - measurement 1 (mm)	SMB 82	1.5	0 to 4	0.11 to 1.5	U	labial/buccal	whole skull	0	0	N/A	N/A		N/A					0	0	N/A	N/A		N/A					0	N/A	N/A	0		N/A					0	N/A	N/A	0		N/A
AG	1	L.v micro-CT	Enamel hypoplastic defect - measurement 1 (mm)	SMB 82	1.5	0 to 4	0.11 to 1.5	U	lingual	whole skull	0	0	N/A	N/A		N/A					0	0	N/A	N/A		N/A					0	N/A	N/A	0		N/A					0	N/A	N/A	0		N/A
AG	1	L.v micro-CT	Enamel hypoplastic defect - measurement 2 (mm)	SMB 82	1.5	0 to 4	0.11 to 1.5	U	labial/buccal	whole skull	0	0	N/A	N/A		N/A					0	0	N/A	N/A		N/A					0	N/A	N/A	0		N/A					0	N/A	N/A	0		N/A
AG	1	L.v micro-CT	Enamel hypoplastic defect - measurement 2 (mm)	SMB 82	1.5	0 to 4	0.11 to 1.5	U	lingual	whole skull	0	0	N/A	N/A		N/A					0	0	N/A	N/A		N/A					0	N/A	N/A	0		N/A					0	N/A	N/A	0		N/A
AG	1	L.v micro-CT	Enamel hypoplastic defect - measurement 3 (mm)	SMB 82	1.5	0 to 4	0.11 to 1.5	U	labial/buccal	whole skull	0	0	N/A	N/A		N/A					0	0	N/A	N/A		N/A					0	N/A	N/A	0		N/A					0	N/A	N/A	0		N/A
AG	1	L.v micro-CT	Enamel hypoplastic defect - measurement 3 (mm)	SMB 82	1.5	0 to 4	0.11 to 1.5	U	lingual	whole skull	0	0	N/A	N/A		N/A					0	0	N/A	N/A		N/A					0	N/A	N/A	0		N/A					0	N/A	N/A	0		N/A
AG	1	L.v micro-CT	Enamel hypoplastic defect - measurement 4 (mm)	SMB 82	1.5	0 to 4	0.11 to 1.5	U	labial/buccal	whole skull	0	0	N/A	N/A		N/A					0	0	N/A	N/A		N/A					0	N/A	N/A	0		N/A					0	N/A	N/A	0		N/A
AG	1	L.v micro-CT	Enamel hypoplastic defect - measurement 4 (mm)	SMB 82	1.5	0 to 4	0.11 to 1.5	U	lingual	whole skull	0	0	N/A	N/A		N/A					0	0	N/A	N/A		N/A					0	N/A	N/A	0		N/A					0	N/A	N/A	0		N/A
AG	1	L.v micro-CT	IGD - present	SMB 82	1.5	0 to 4	0.11 to 1.5	U	internal	whole skull	0	0	N/A	N/A		N/A					0	0	N/A	N/A		N/A					0	N/A	N/A	0		N/A					0	N/A	N/A	0		N/A
AG	1	S.v micro-CT	Inventory	SMB 82	1.5	0 to 4		U	labial/buccal	Individual tooth samples
AG	1	S.v micro-CT	Tooth Wear	SMB 82	1.5	0 to 4		U	occlusal	Individual tooth samples	2	2									1	1									2													1
AG	1	S.v micro-CT	Dental Trauma	SMB 82	1.5	0 to 4		U	labial/buccal	Individual tooth samples	0	0									0	0									3													3
AG	1	S.v micro-CT	Dental Trauma	SMB 82	1.5	0 to 4		U	lingual	Individual tooth samples	0	0									0	0									3													3
AG	1	S.v micro-CT	Occlusion	SMB 82	1.5	0 to 4		U	occlusal	Individual tooth samples
AG	1	S.v micro-CT	Overbite	SMB 82	1.5	0 to 4		U	occlusal	Individual tooth samples
AG	1	S.v micro-CT	Overjet	SMB 82	1.5	0 to 4		U	occlusal	Individual tooth samples
AG	1	S.v micro-CT	Caries - present on tooth	SMB 82	1.5	0 to 4		U	All	Individual tooth samples	0	0									0	0									0													0
AG	1	S.v micro-CT	Caries- location 1	SMB 82	1.5	0 to 4		U	mesial	Individual tooth samples	0	0									0	0									0													0
AG	1	S.v micro-CT	Caries- location 2	SMB 82	1.5	0 to 4		U	distal	Individual tooth samples	0	0									0	0									0													0
[truncated: 341 more rows]
[truncated: 2 more columns]

## Sheet: DATA DICTIONARY
Variable label	Variable name	Description	Notes
* Info only not on chart* N/A = or 'BLANK' cell		N/A = the tooth is not observable or was not present due to antemortem/postmortem tooth loss a 'blank' cell = this method was not applicable or able to be used
Surface of the tooth	side of tooth examined	Occlusal / incisal surface: the biting surface Mesial surface: the surface of the tooth closer towards the midline of the mouth Distal surface: the surface of the tooth further away from the midline of the mouth Labial / buccal surface: tooth surface facing the outside of the mouth - i.e., opposite the lip or cheek Lingual / palatial surface: tooth surface facing the inside of themouth - i.e., op…	The surface/s of the tooth that were examined or that a pathology or defect was found.
* Info only not on chart* Anatomical areas of the tooth	Tooth structure examined	Crown region: the area of the tooth covered in enamel CEJ: cementoenamel junction - were the enamel and cementum (root) meet Root: the are of the tooth that is covered in cementum and is situated in the alveloar bone of the jaw.
Sample type		Whole skull: the full dentition in situ in the maxillary and mandibular bones of the skull. Individual tooth sample: a tooth sample that had fallen out postmortem or naturally exfoilated.
Skeletal age given (Anson, 2004)	Skeletal age given (Anson, 2004)	The age assigned to each individual after a visual examanintion of the skeletal remains using various anthropological age estimation methods that assess the morphological changes that occur during sexual maturity.	Tin Anson originally excavated the individuals from St Mary's Church Cemetery in 2000. After a visual (macroscopic) examination immediately post excavation he assessed the age and sex.
Skeletal age range	Age range	An age range of 10 years for adults and 5 years for subadults is given to individuals as it is almost impossible to be 100% certain that the skeletal age is accurate due to human variation in growth and maturation timiming.
Dental Age range	Dental age	Age or age range estimation is given i.e., 10 years or 10 to 11 years for a child. Dental development stops (on average) at around 23.5 years of age when the third molars (wisdom teeth) erupt. Age estimation for adults has to be given as <23.5 years as this is the last age on the London Atlas Tooth chart. The condition of the teeth through wear and tear etc. were noted during the examinations/met…	Dental age is estimated using the London Atlas of dental development and eruption rate chart. This system has been shown to be the most accurtate to date (2021) compared to traditional anthropological and forensic dental age estimation methods.
Inventory	Tooth inventory	Tooth Present/ below alveolar crest (unerupted)= 1 Tooth Present/ above alveolar crest (erupting/erupted)= 2 Tooth Absent/ signs of healing of the alveloar bone = 3 (antemortem tooth loss) Tooth Absent/ No signs of healing of the alveloar bone = 4	A category assigned to each tooth or the area of bone in the jaw that the tooth would have occupied
Occlusion	Angle's Category of malocclusion	Class 1: most common (maxillary mesiofacial cusp located in the mesofacial developmental grove of the mandibular first molar. Class 2: posterior positioning of the mandible to the maxilla. Class 3: anterior positioning of the mandible to the maxilla. N/A = tooth not observable or not present due to antemortem/postmortem tooth loss	A class assigned to an individual to identify the misalignment or incorrect position (or not) between the upper and lower dental arches in relation to one another.
Overbite		Overbite measurement in mm - anterior - maxillary teeth only -	A measurement of the vertical overlap (superior - inferior) of the maxillary (upper) central incisors, relative to the position of the mandibular (lower) central incisors.
Overjet		Overjet measurement in mm - anterior - maxillary teeth only -	A measurement of the horizontal overlap of the maxillary (upper) central incisors, relative to the position of the mandibular (lower) central incisors.
Tooth wear	Category of occlusal tooth wear	Tooth absent = 0 Category 1 =1 Category 2 =2 Category 3 =3 Category 4 =4 Category 5 =5 Category 6 =6 Category 7 = 7 Category 8 = 8	Category assigned to each tooth. Higher category implies more tooth wear
Trauma	Evidence of dental trauma	Tooth not present/observable = N/A No visible trauma = 0 Trauma involving the enamel = 1 Trauma involving the enamel and dentine = 2 Trauma involving the enamel, dentine and pulp = 3	Category assigned to each tooth and any trauma sustained either involving the enamel only or the enamel and dentine or all three structures i.e., enamel, dentine and pulp. The labial and buccal surfaces of each tooth were examined and scored. The trauma could have been sustained antemortem or postmortem.
Occlusion -	Angle's Category of malocclusion	Class 1: most common (maxillary mesiofacial cusp located in the mesofacial developmental grove of the mandibular first molar = 1 Class 2: posterior positioning of the mandible to the maxilla =2 Class 3: anterior positioning of the mandible to the maxilla =3 Tooth absent or not observable (i.e., antemortem or postmortem tooth loss) = N/A	A category assigned to the position of the permanent maxillary (upper) first molar (16 & 26) in relation to the permanet mandibular (lower) first molar. Class 2 and 3 either maxilla or mandible are malaligned with the opposing jaw.
Caries_ present		Tooth absent or not observable = N/A Caries absent: 0 Caries present: 1	Category assigned to each tooth for the presnces or absence or carious lesions on the tooth (crown, CEJ and/or root).
Caries_location 1		Tooth absent or unobservable = N/A Caries absent = 0 Caries on mesial surface =1 Caries on other surface of crown = 2	Category assigned to each tooth to identify and specify the surface location of the carious lesion/s on the tooth
Caries_location 2		Tooth absent or unobservable = N/A Caries absent = 0 Caries on distal surface =1 Caries on other surface of crown = 2	see above
Caries_location 3		Tooth absent or unobservable = N/A Caries absent = 0 Caries on occlusal surface =1 Caries on other surface of crown = 2	see above
Caries_location 4		Tooth absent or unobservable = N/A Caries absent = 0 Caries on labial / buccal surface =1 Caries on other surface of crown = 2	see above
Caries_location 5		Tooth absent or unobservable = N/A Caries absent = 0 Caries on lingual surface =1 Caries on other surface of crown = 2	see above
Caries _ CEJ 1		Tooth absent or unobservable = N/A Caries absent = 0 Caries above CEJ = 1 (crown surface) Caries on another location of the tooth = 2	Category assigned to each tooth to identify and specify the surface location of the carious lesion/s on the tooth in relation to the CEJ (cementoenamel jumction). This shows if the caries is/are on the crown surface above the CEJ, on the CEJ itself, or belwo the CEJ on the surface of the root.
Caries _ CEJ 2		Tooth absent or unobservable = N/A Caries absent = 0 Caries on CEJ = 1 Caries on another location of the tooth = 2	see above
Caries _ CEJ 3		Tooth absent or unobservable = N/A Caries absent = 0 Caries below CEJ = 1 (root surface) Caries on another location of the tooth = 2	see above
ICCMS Score _ Radiolucency (RA)	Caries - RA	Tooth absent or unobservable = N/A No RA = 0 RA in outer 1/2 of enamel =1 RA in inner 1/2 of enamel = 2 RA limited to outer 1/3 of dentine = 3 RA reaching the middle 1/3 of dentine = 4 RA reaching the inner 1/3 of dentine = 5 RA into the pulp = 6	Category assigned to each tooth that specifies the location and the extent of a carious lesion. Caries reduce the density of the tooth structure and therefore, cause the area of the tooth with the lesion to be more radiolucent compared to the rest of the tooth. Higher category implies the carious lesion has involved the pulp at the centre of the internal tooth structure.
Alveolar status		Tooth absent or unobservable = N/A Unable to score (alveolar bone damaged or missing) = 0 Grade 1 - alveolar margin meets tooth at a knife-edge acute angle - (no disease) =1 Grade 2 - alveolar margin is blunt and flat-topped with a slight rim (slight periodonditis) =2 Grade 3 - alveolar margin is rounded and porous, with a trough of 2- 4 mm depth between tooth & alveolus (moderate periodontitis) …	Ogden's (2008) Screening System that assigns a grade to the condition of the BUCCAL contours of the alveolar margins of the posterior teeth only. A higher grade implies a more severe grade of periodontal disease.
Periodontol disease		Tooth absent/not observable = N/A Tooth Present but CEJ NOT visible = 0 (semi or newly erupted crown) Measurement (mm) from CEJ to bony crest midpoint (midline) of tooth crown surface =	The average measurement from the CEJ on a tooth to the crest of the alveolar bone that has not been affected by periodontal disease is ~ 2 mm. The higher the measurement over this point suggests that there has been horizontal alveolar bone loss due to periodontal disease. The measurement is taken along the midline of the tooth on the labial/buccal and the lingual surfaces.
Enamel hypoplastic defect/s - present		Tooth absent or not observable (i.e., antemortem or postmortem tooth loss): N/A Enamel hypoplastic defect absent = 0 Enamel hypoplastic defect present =1	Category assigned to each tooth for the presences or absence of enamel hypoplastic defects on the tooth enamel (crown).
Enamel hypoplastic defect/s - type		Tooth absent /not observable = N/A No defect = 0 Linear enamel hypoplasia= 1 Other enamel hypoplastic defect = 2 or Enamel hypoplastic pit/s = 1 Other enamel hypoplastic defect = 2	Category assigned to each tooth for the presences or absence of a linear enamel hypoplastic defects or a enamel hypoplastic pit or group of pits on the tooth enamel (crown).
Enamel hypoplastic defect/s - Number of lines OR pit/s		Tooth absent /not observable = N/A No defect = 0 State number of lines = or Singular pit = 1 Multiple pits (group) = 2	Category assigned to each tooth for the presences or absence of a linear enamel hypoplastic defect/s or or a enamel hypoplastic pit or group of pits on the tooth enamel (crown). PLUS the number of lines or pits observed.
Enamal hypoplastic defect measurement 1, 2 3 or 4 (EH 1, 2 or 3)		Tooth absent /not observable = N/A No defect = 0 Give measurement in mm	The first measurement from the CEJ to the enamel hypoplastic defect (EH 1) is the closest defect to the CEJ, and EH 4 is the furthest from the CEJ and closest to the biting/ occlusal surface of the tooth.
IGD	Interglobular dentine (IGD)	Tooth absent /not observable = N/A IGD absent = 0 IGD present = 1	IGD is a mineralisation defect in the dentine of the tooth. Category assigned to each tooth for the presences or absence of this dentine defect.
