# Supplementary material for: The Oral Health of a Group of 19th Century South Australian Settlers in Relation to Their General Health and Compared With That of Contemporaneous Samples
Source: Preprints.org preprint supplement (doi:10.20944/preprints202302.0167.v1), 2023-02-09
Supplement: Supplementary file 2 [file Supplementary_Table S10. EH_number of defects per tooth.docx]

| **St Mary’s**  **ID** | **Estimation of age**  (skeletal & eruption findings)  (years) | **Sex** | **Total**  **number**  **of teeth present** | **Permanent and/or**  **primary dentition** | **Tooth type/s**  **affected by**  **EH defects**  (anatomical tooth classification) | **Tooth type/s**  **affected by EH defects**  (*FDI notation numbers) | **Total**  **number**  **of teeth with EH**  **defects** | **Percentage**  **of teeth affected by EH defects** | **Type**  **of EH defect/s**  **present** | **Number of EH defects**  **per tooth** | **Antemortem tooth loss**  **(***FDI notation numbers) *(evidence of healing or healed alveolar bone in the original position of the tooth)* |
| --- | --- | --- | --- | --- | --- | --- | --- | --- | --- | --- | --- |
|  |  |  |  |  |  |  |  |  |  |  |  |
| **SMB 58** | 0-2 | U | 11 | *All primary* teeth | Upp R & L Cent I  Upp R & L Lat I,  Low L Lat I, Upp R m1, Low L & R m1 | 51, 52, 54, 61, 62, 72, 74, 84 | 8 | 72% | Linear & pits | 51, 61 = 1 line, 52, 62 = 1 line & 1 pit, 54, 72, 84 = group of multiple pits, | None |
| **SMB 11** | 0-2 | U | 19 | primary | Upp R & L Canines  Low R & L Canines | 53, 63, 73, 83 | 4 | 21% | Pits | 53, 63, 73 & 83 = group of multiple pits | None |
| **SMB 04A** | 3-5 | U | 19 | primary | Low R & L Cent I  Low R & L Lat I | 71, 72, 81, 82 | 4 | 21% | Pits | 71, 72, 81 & 82 = small pits in a line | None |
| **SMB 35** | 6-9 | U | 11 | primary | Upp L Canine | 63 | 1 | 9% | Pits | 63= 1 pit | None |
| **SMB 19** | 6-9 | U | 22 | *Mixed dentition:*  7 primary  15 Permanent | *Primary teeth*:  Low R canine  *Permanent teeth*:  Upp R & L Cent I, Canine, P1, P2, Upp L Lat I. Low R Lat I. | 12, 13, 14, 15,  21, 22, 42, 83 | 8 | 36% | Linear & pit | 12= 1 pit, 13 = 1 pit, 14 = 1 pit, 15 = group of multiple pits,  21 = 1 line, 22 = 1 pit,  42 =1 pit, 83= 1 pit | None |
| **SMB 51** | 10-15 | U | 16 | 1 primary  15 Permanent | *Permanent teeth*:  Upp R Cent I, Canine, P1, M1, Upp L Lat I, Canine, P1, P2, M1,  Low L P1, M1 | 12, 13, 14,16, 22, 23,24, 25, 26, 34, 36 | 11 | 69% | Linear & pit | 12, 13 = 2 lines, 14, 24, 36 = 1 line & 1 pit, 16 = 1 line & a group of multiple pits,  22, 23, 26 = 2 lines, 25 = 2 lines & a group of multiple pits, 34 = 3 lines | None |
| **SMB 52B** | 10-15 | U | 17 | 2 primary  15 permanent | *Permanent teeth*:  Upp R Cent I, Lat I, Canine, M1,  Upp L Cent I, Canine, M1, Low L Cent I, Lat I, Canine, M1, Low R Cent I, Lat I, Canine | 11, 12, 13, 16, 21, 23, 26, 31, 32, 33, 36, 14, 42, 43 | 14 | 82% | Linear & pit | 11, 12, 23, 26, 31, 32, 43 = 1 line, 13, 33, 42 = 2 lines,  16, 21, 36 = 1 pit,  41 = 1 line & 1 pit | None |
| **SMB 70** | 10-15 | U | 8 | 2 primary  6 Permanent | *Primary teeth:*  Upp R & L Canines  *Permanent teeth*:  Upp L Cent I, M1. | 53, 21, 63, 26 | 4 | 50% | Linear & Pits | 53, 63, 26 = a group of multiple pits,  21 = 3 lines & a group of multiple pits | None |
| **SMB 28** | 10-15 | U | 26 | *All Permanent* | Upp R Cent I, Lat I, P2, M1,Upp L Lat I, Canine, P2, M1, M2, Low L Cent I, Lat I, Canine, P1, P2, Low R Cent I, Lat I, Canine, P1, P2, M2 | 11, 12, 15, 16,  22, 23, 25, 26,  27, 31, 32, 33,  34, 35, 41, 42,  43, 44, 45, 47 | 20 | 77% | Linear & pit | 11, 16, 27, 47 = a group of multiple pits (in 2 lines), 12, 22 = 2 lines, 15, 25, 41 = 1 pit  23, 43 = 3 lines, 26 = 1 line & a group of multiple pits, 31, 32, 33, 34, 35, 42, 44, 45 = 1 line, | None |
| **SMB 79** | 16-19 | U | 25 | Permanent | Upp R Canine,  Upp L Canine, M2,  Low R & L Canines | 13, 23, 27, 33,  43 | 5 | 20% | Linear & pit | 13 = 1 pit, 23, 27 = a group of multiple pits,  33 = 2 lines, 43 = 1 line & a group of multiple pits | 36 |
| **SMB 05** | 20-29 | F | 6 | Permanent | Low R Cent I, Lat I | 41, 42 | 2 | 33% | Linear | 41, 42 = 1 line | 11, 12, 13, 14, 15, 16, 18, 21, 22, 23, 24, 25, 26, 27,28, 36, 37, 38, 45, 46, 47, 48 |
| **SMB 53C** | 30-39 | F | 9 | Permanent | Upp R Cent I, Canine, P1, Upp L Cent I, Canine | 11, 13, 14, 21,  23 | 5 | 56% | Linear & pit | 11 = 2 lines & a group of pits, 13, 14 = 2 lines, 21 = 1 line, 23 = a groupof multiple pits | 15, 16, 17, 18, 24, 25, 27, 28, 31, 35, 36, 37, 38, 41, 44, 47, 48 |
| **SMB 66B** | 30-39 | F | 17 | permanent | Upp R P1, M2, Upp L Cent I, Canine, M2, Low L P1, Low R P1, P2 | 14, 17, 21, 23,  27, 34, 44, 45 | 8 | 47% | Pits | 14, 17, 21, 23, 27, 44 & 45 = a group of multiple pits, 34 = 1 pit | 11 (root only), 13, 16, 18, 26, 28, 36, 37, 38, 46, 47, 48 |
| **SMB 73** | 30-39 | M | 19 | Permanent | Upp R Cent I, Lat I, Canine, M1, UppL Cent I, Canine, P2, Low L Cent I, Lat I, Canine, P1, Low R Cent I, Lat I, Canine, P1 | 11, 12, 13, 16,  21, 23, 25, 31,  32, 33, 34, 41,  42, 43, 44 | 15 | 79% | Linear & pits | 11, 21, 31, 32, 41 & 42= 2 lines & a group of multiple pits, 12 = 1 line,  13, 23 33 & 43 = 1 line & a group of multiple pits, 16, 44 = 1 pit & a group of multiple pits, 25 = 1 pit | 15, 17, 18, 24, 26, 27, 36, 37, 38, 46, 47, 48 |
| **SMB 06** | 40-49 | M | 24 | Permanent | Upp R Cent I,  Low L Cent I, Lat I,  Low R Cent I, Lat I | 12, 31, 32,41,  42 | 5 | 21% | Linear | 12 = 3 lines, 31, 32, 41,42 = 1 line, | 28, 34, 35, 36, 38, 48 |
| **SMB 09** | 40-49 | M | 22 | Permanent | Upp R Cent I, Canine,  Upp L Cent I, Lat I, Canine, Low L Lat I, Canine, Low R Canine | 12, 13, 21, 22,  23, 32, 33, 43 | 8 | 36% | Linear & pit | 12, 13, 21, 22, 23, 32, 33, 43 = 1 line | 11, 27, 38 |
| **SMB 57** | 40-49 | M | 25 | Permanent | Upp R Cent I, Lat I, Canine, P1, Upp L, M2, Low L Lat I, Canine, P2, Low R Lat I, Canine | 11, 12, 13, 14, 27, 32, 33, 35, 42, 43 | 10 | 40% | Linear & pit | 11, 12, 32, 33 & 42 = 2 lines, 13 = 1 line & a group of multiple pits, 14, 27 & 35= a group of multiple pits, 43 = 3 lines | 25, 28 |
| **SMB 72** | 40-49 | M | 29 | Permanent | Upp R Lat I, Canine,  Upp L Canine, P1,  Low L M3, Low R Canine, M3 | 12, 13, 23, 24,  38, 43, 48 | 7 | 24% | Pits | 12, 38, 48= 1 pit, 13, 23, 24, 43 = a group of multiple pits (in a line) |  |
| **SMB 83** | 40-49 | M | 16 | Permanent | Upp R Canine,  Upp L Cent I, Canine, M2, M3, Low L Canine, P1, Low R Lat I, Canine | 13, 21, 23, 27,  28, 33, 34, 42,  43 | 9 | 56% | Linear & pit | 13, 23 = 2 lines, 21, 33, 34, 42 = 1 line, 27, 28 = a group of multiple pits,  43 = 2 lines & a group of multiple pits | 16, 18, 26, 36, 45, 46 |
| **SMB 85** | 40-49 | M | 2 | Permanent | Low L Canine | 33 | 1 | 50% | Linear & pit2 | 33 = 1 line & a group of multiple pits | 11, 12, 13, 14, 15, 16, 17, 18, 23, 24, 25, 26, 27, 28, 31, 35, 36, 37, 38, 41, 43, 44, 45, 46, 47, 48 |
| **SMB 23** | 50-59 | M | 21 | Permanent | Upp R M2, M3, Upp L Cent I, Low L Cent I,  Low R Cent I, Lat I, Canine | 17, 18, 21, 31,  32, 33, 41,42,  43 | 9 | 43% | Linear & pit | 17, 18, 21, 33, 43 = a group of multiple pits, 31, 32, 41, 42 = 1 line | 48 |
| **SMB 59** | 50-59 | M | 15 | Permanent | Upp R Cent I, Lat I, Canine, Upp L Lat I, Canine, Low L P2, M3, Low R Cent I, Lat I, P1, M1 | 11, 12, 13, 21,  22, 23, 35, 38,  41, 42, 44, 46 | 12 | 80% | Linear & pit | 11, 42 = 2 lines, 12, 13, 22, 23, 35, 38, 44, 46 = a group of multiple pits, 21 & 41 = 3 lines | 14, 15, 24, 25, 47 |
| **SMB 63** | 50-59 | M | 3 | Permanent | Low L Lat I, Canine | 32, 43 | 2 | 67% | Pits | 32 = a group of multiple pits, 43 = 1 pit | 11, 12, 14, 15, 16, 17, 21, 22, 24, 25, 26, 27, 28, 35, 36, 37, 38, 41, 42, 44, 46, 47, 48 |
| **SMB 68** | 50-59 | M | 19 | Permanent | Upp R P1, Upp L, Canine, Low L P2,  Low R Canine, P1, P2 | 14, 23, 35, 43, 44, 45 | 6 | 42% | Pits | 14, 23, 35, 43, 44, & 45 = a group of multiple pits | 15, 16, 36, 41, 46 |
| **Total number of primary teeth affected** | | | | | | | 20 |  | | | |
| **Total number of Permanent teeth affected** | | | | | | | 158 |  | | | |
| **Grand Total of teeth affected** | | | | | | | 178 |  | | | |

**Notes**: **M** = male, **F** = female, **U** = undetermined sex. **EH** = Enamel hypoplastic defects. **Upp** = upper jaw (maxilla), **Low** = lower jaw (Mandible), **Cent.** = central, **Lat.** = lateral, **I** = incisor, **P1** = first premolar, **P2** = second premolar, **m1** = first *primary* molar, **M1**= first *permanent* molar, **m2** = second *primary* molar, **M2** = second *permanent* molar, **M3** = third permanent molar.

*A tooth may have more than one EH defect. **AMTL**= antemortem tooth loss = evidence of healing or the alveolar bone has healed in the original position of the tooth. **FDI** = Fédération Dentaire Internationale tooth identification notation system
