# Supplementary material for: The Oral Health of a Group of 19th Century South Australian Settlers in Relation to Their General Health and Compared With That of Contemporaneous Samples
Source: Preprints.org preprint supplement (doi:10.20944/preprints202302.0167.v1), 2023-02-09
Supplement: Supplementary file 3 [file Supplementary_Table S1_Dental Inventory_Dental & Skeletal Age Ranges_Sex_1.docx]

**Supplementary Material- Table S1.** St Mary’s Cemetery - Dental inventory.

| **St Mary’s Burial**  **I/D** | **Sex** | **†Dental age range**  (months/years)  London Atlas of human tooth development and eruption  (AlQahtanti et al., 2010) | **Skeletal age range**  (years)  (Anson, 2004) | Number of  primary and/ or permanent teeth present | **Dental Inventory**  Tooth type present.  ***FDI** notation number/s |
| --- | --- | --- | --- | --- | --- |
| **SMB 66 A** | U | 7 mths-1  (+/- 3 mths) | 0-2 | 6 *primary* | 51, 52, 61, 62, 71, 81 |
| **SMB 40** | U | 10 mths-1  (+/- 3 mths) | 0-2 | 6 *primary* | 51, 61, 62, 71, 81, 82 |
| **SMB 32** | U | 10.5 mths-1  (+/- 3 months) | 0-2 | 8 *primary* | 51, 52, 61, 62, 71, 72, 81,82 |
| **SMB 41** | U | 1-1.5  (+/- 3 mths) | 0-2 | 5 *primary* | 54, 62, 64, 71, 81 |
| **SMB 08** | U | 1-1.5  (+/- 3 mths) | 0-2 | 8 *primary* | 51, 54, 61, 64, 71, 81, 82, 84 |
| **SMB 62** | U | 1-1.5  (+/- 3 mths) | 0-2 | 10 *primary* | 51, 52, 61, 64, 71, 72, 74, 81, 82, 84 |
| **SMB 82** | U | 1-1.5  (+/- 3 mths) | 0-2 | 9 *primary* | 51, 52, 54, 61, 62, 71, 74, 81, 84 |
| **SMB 24** | U | 1-1.5  (+/- 3 mths) | 0-2 | 9 *primary* | 51, 52, 54, 61, 62, 64, 74, 82, 84 |
| **SMB 27 B** | U | 1-1.5  (+/- 3 mths) | 0-2 | 10 *primary* | 51, 52, 54, 61, 71, 72, 74, 81, 82, 84 |
| **SMB 58** | U | 1-1.5  (+/- 3 mths) | 0-2 | 11 *primary* | 51, 52, 61, 62, 64, 71, 72, 74, 81, 82, 84 |
| **SMB 18** | U | 1-1.5  (+/- 3 mths) | 0-2 | 1 *primary* | 74 |
| **SMB 11** | U | 2-2.5  (+/- 3 mths) | 0-2 | 19 *primary* | 51, 52, 53, 54, 55, 61, 62, 63, 64, 71, 72, 73, 74, 75, 81, 82, 83, 84, 85 |
| **SMB 31** | U | 3-3.5  (+/- 6 mths) | 3-5 | 17 *primar*y | 51, 53, 54, 55, 63, 64, 65, 71, 72, 73, 74, 75, 81, 82, 83, 84, 85 |
| **SMB 04A** | U | 3.5-4.5  (+/- 6 mths) | 3-5 | 19 *primary* | 51, 52, 53, 54, 55, 61, 62, 63, 64, 71, 72, 73, 74, 75, 81, 82, 83, 84, 85 |
| **SMB 75** | U | 5-6  (+/-1 yr) | 6-9 | 14 *primary* | 54, 55, 62, 63, 64, 65, 72, 73, 74, 75, 81, 83, 84, 85 |
| **SMB 35** | U | 6-7 (+/-1 yr) | 6-9 | 11 *primary* | 51, 52, 54, 63, 64, 65, 73, 74, 75, 84, 85 |
| **SMB 19** | U | 7.5-8.5  (+/-1 yr) | 6-9 | 7 *primary*  15 permanent | 11, 12, 13, 14, 15, 16, 21, 22, 24, 65, 26, 32, 73, 74, 75, 36,41, 42, 83, 84, 85, 46, |
| **SMB 70** | U | 11.5-12.5  (+/-1 yr) | 6-9 | 2 *primary*  6 permanent | 53, 14, 15, 21, 63, 24, 25, 26 |
| **SMB 52 B** | U | 10.5-11.5  (+/-1 yr) | 10-15 | 2 *primary*  16 permanent | 11, 12, 13, 16, 21, 22, 23, 26, 31, 32, 33, 75, 36, 41, 42, 43, 85, 46 |
| **SMB 51** | U | 10-11  (+/-1 yr) | 10-15 | 1 primary  15 permanent | 12, 13, 14, 15, 16, 22, 23, 24, 25, 26, 31, 34, 36, 41, 42, 84, |
| **SMB 28** | F | 15.5-16.5  (+/-1 yr) | 10-15 | 26 permanent | 11, 12, 14, 15, 16, 17, 22, 23, 24, 25, 26, 27, 31, 32, 33, 34, 35, 36, 37, 41, 42, 43, 44, 45, 46, 47 |
| **SMB 79** | U | 15.5-16.5  (+/-1 yr) | 16-19 | 25 permanent | 11, 13, 14, 15, 17, 21, 22, 23, 24, 25, 26, 27, 31, 32, 33, 34, 35, 37, 41, 42, 43, 44, 45, 46, 47 |
| **SMB 05** | F | Over 23.5 | 20-29 | 6 permanent | 32, 35, 41, 42,43, 44, |
| **SMB 53 C** | F | Over 23.5 | 30-39 | 9 permanent | 11, 13, 14, 21, 23, 26, 34, 42, 46 |
| **SMB 66 B** | F | Over 23.5 | 30-39 | 17 permanent | 12, 14, 15, 17, 21, 22, 23, 27, 31, 32, 33, 34, 41, 42, 43, 44, 45 |
| **SMB 73** | M | Over 23.5 | 30-39 | 19 permanent | 11, 12, 13, 16, 21, 22, 23, 25, 28, 31, 32, 33, 34, 35, 41, 42, 43, 44, 45 |
| **SMB 06** | M | Over 23.5 | 40-49 | 24 permanent | 11, 12, 13, 14, 15, 16, 17, 22, 23, 24, 25, 26, 27, 31, 32, 33, 37, 41, 42, 43, 44, 45, 46, 47 |
| **SMB 09** | M | Over 23.5 | 40-49 | 22 permanent | 12, 13, 16, 21, 22, 23, 24, 25, 26, 31, 32, 33, 34, 35, 36, 37, 43, 44, 45, 46, 47, 48 |
| **SMB 57** | M | Over 23.5 | 40-49 | 25 permanent | 11, 12, 13, 14, 15, 16, 17, 18, 22, 26, 27, 32, 33, 34, 35, 36, 37, 41, 42, 43, 44, 45, 46, 47, 48, |
| **SMB 61** | F | Over 23.5 | 40-49 | 7 permanent | 25, 32, 33, 35, 41, 42, 44 |
| **SMB 72** | M | Over 23.5 | 40-49 | 29 permanent | 11, 12, 13, 14, 15, 16, 17, 18, 21, 22, 23, 24, 25, 26, 27, 32, 33, 34, 35, 36, 37, 38, 42, 43, 44, 45, 46, 47, 48 |
| **SMB 78** | M | Over 23.5 | 40-49 | 4 permanent | 13, 14, 34, 35 |
| **SMB 83** | M | Over 23.5 | 40-49 | 16 permanent | 13, 14, 17, 21, 23, 24, 27, 28, 33, 34, 37, 38, 42, 43, 47, 48 |
| **SMB 85** | M | Over 23.5 | 40-49 | 2 permanent | 33, 34 |
| **SMB 14** | M | Over 23.5 | 50-59 | 2 permanent | 23, 35 |
| **SMB 23** | M | Over 23.5 | 50-59 | 21 permanent | 13, 14, 15, 17, 18, 21, 22, 23, 27, 28, 31, 32, 33, 34, 35, 37, 41, 42, 43, 44, 47 |
| **SMB 59** | M | Over 23.5 | 50-59 | 15 permanent | 11, 12, 13, 21, 22, 23, 34, 35, 37, 38, 41, 42, 44, 46, 48 |
| **SMB 63** | M | Over 23.5 | 50-59 | 3 permanent | 33, 34, 43 |
| **SMB 68** | M | Over 23.5 | 50-59 | 19 permanent | 13, 14, 17, 18, 23, 24, 25, 31, 32, 34, 35, 37, 38, 42, 43, 44, 45, 47, 48 |
| **SMB 84** | F | Over 23.5 | 50-59 | 0 | N/A |
|  |  |  |  |  |  |
| **Total number of primary teeth present:** | | | | **175** |  |
| **Total number of Permanent teeth present:** | | | | **343** |  |
| **Grand Total of all tooth types present:** | | | | **518** |  |

**Notes**: **†** Dental age range – “Over 23.5 years”= Estimation of dental age range is based on development and when this is complete. ***** FDI = Fédération Dentaire Internationale tooth identification notation system

**References:**

**Anson,** T.J., 2004. The bioarchaeology of the St. Mary's free ground burials: reconstruction of colonial South Australian lifeways, Thesis (Ph.D.)-University of Adelaide, Dept. of Anatomical Sciences, 2004.

**AlQahtani,** S.J., Hector, M.P., Liversidge, H.M., 2010. Brief communication: The London atlas of human tooth development and eruption, American Journal of Physical Anthropology 142, 481-490.

**FDI World dental Federation**, 2022. FDI Two-Digit Notation, FDI World Dental Federation, France.
