# Supplementary material for: The Oral Health of a Group of 19th Century South Australian Settlers in Relation to Their General Health and Compared With That of Contemporaneous Samples
Source: Preprints.org preprint supplement (doi:10.20944/preprints202302.0167.v1), 2023-02-09
Supplement: Supplementary file 5 [file Supplementary_Table S3_SV Micro-CT list_individuals, tooth type & number.docx]

| **St Mary’s**  **ID** | **Dental**  **age range**  (years & months) | **Chronological Age range**  (years) | **Sex** | **Permanent or *primary***  **Tooth Type**  *with the FDI notation number* | **Total number**  **of teeth**  **SV Micro-CT scanned** |
| --- | --- | --- | --- | --- | --- |
| **SMB 27B** | 1-1.5  (+/- 3 mths) | 0-2 | U | *primary* Low L M1 (74) | **1** |
| **SMB 58** | 1-1.5  (+/- 3 mths) | 0-2 | U | *primary* Low L m1 (74) | **1** |
| **SMB 82** | 1-1.5  (+/- 3 mths) | 0-2 | U | *primary* Upp R *cent incisor (51)  *primary* Upp R lat incisor (52)  *primary* Upp L cent incisor (61)  *primar*y Upp L lat incisor (62)  *primary* Low R cent incisor (71)  *primary* Low L cent incisor (81) | **6** |
| **SMB 4A** | 3.5-4.5  (+/- 3 mths) | 2-5 | U | *primary* Upp R Lat Incisor (52)  *primary* Upp R Canine (53)  *primary* Upp L Cent Incisor (61)  *primary* Upp L Canine (63) | **4** |
| **SMB 19** | 7.5- 8.5  (+/- 6 mths) | 6-10 | U | Permanent Low L M1 (36) | **1** |
| **SMB 70** | 11.5-12.5 (+/- 6 mths) | 8-9 | U | *primary* Low R m1 (74)  Permanent Upp R M1 (16) | **2** |
| **SMB 52B** | 10.5-11.5 (+/- 6 mths) | 10-14 | U | *primary* Low L m2 (75)  Permanent Upp R Cent Incisor (11)  Permanent Upp R lat Incisor (12) | **3** |
| **SMB 51** | 10-11  (+/- 6 mths) | 10-14 | U | Permanent Low R M1 (46) | **1** |
| **SMB 28** | 12-15  (+/- 6 mths) | 12-16 | U | Permanent Low L M1 (36) | **1** |
| **SMB 79** | 15.5-16.5 (+/- 6 mths) | 16-18 | U (F?) | Permanent Upp L M1 (26) | **1** |
| **SMB 05** | Over 23.5 | 20-29 | F | Permanent Low R Canine (43) | **1** |
| **SMB 53C** | Over 23.5 | 30-39 | F | Permanent Upp R M1 (16) | **1** |
| **SMB 66B** | Over 23.5 | 30-39 | F | Permanent Upp R lat incisor (12)  Permanent Upp R P1 (14)  Permanent Upp R P2 (15)  Permanent Upp R M2 (17)  Permanent Upp L canine (23) | **5** |
| **SMB 73** | Over 23.5 | 30-39 | M | Permanent Upp R P1 (14)  Permanent Upp R Cent Incisor (11)  Permanent Upp R M1 (16)  Permanent Upp L Canine (23)  Permanent Upp L P2 (25)  Permanent Upp L M3 (28) | **6** |
| **SMB 6** | Over 23.5 | 40-49 | M | Permanent Upp L Canine (23) | **1** |
| **SMB 72** | Over 23.5 | 40-49 | M | Permanent Low R M2 (47) | **1** |
| **SMB 85** | Over 23.5 | 40-49 | M | Permanent Low L canine (33) | **1** |
| **SMB 23** | Over 23.5 | 50-59 | M | Permanent Low R M2 (47) | **1** |
| **SMB 63** | Over 23.5 | 50-59 | M | Permanent Low R Lat Incisor (42) | **1** |
| **SMB 68** | Over 23.5 | 50-59 | M | Permanent Low R M3 (48) | **1** |
| **SMB 83** | Over 23.5 | 50- 59 | M | Permanent Upp R M3 (18) | **1** |
|  |  |  |  |  |  |
|  |  |  |  | Total number of teeth SV Micro-CT scanned: | **41** |

**Table S3.** Small Volume Micro-CT scanning of individual teeth associated with skulls from individuals of the St Mary’s Cemetery sample. Additional SV Micro-CT scan settings information on page 2.

**Table S3 Notes:** M= male, F= female, U= undetermined sex, Low = lower/ mandibular tooth type, Upp = upper/ maxillary tooth type, L=left, R=right, Cent. /*cent. = central, (***** lower case text denotes primary dentition, capitalised text denotes permanent teeth), Lat = lateral, P1 or P2 = first or second premolar, M1, M2 or M3 = first, second or third molar.

**SV Micro-CT scan settings information:**

Equipment: Bruker SkyScan 1276 (Bruker, 2022)

The desktop SV Micro-CT scanner was set at source voltage of 100 kV, source current of 200 µA, and camera binning of 4032 x 2688, with an aluminium and copper filter. The Nrecon software (Bruker, 2022), was used for the reconstruction of the scan data sets.

**Reference:**

**Bruker**, 2022. Position, Scan, Reconstruct and Analyze, Bruker. Micro Photonics Inc, 2020. Micro-CT Software: NRecon Reconstruction Software: Fast micro-CT reconstruction software., Micro Photonics Inc.
