# Supplementary material for: The Oral Health of a Group of 19th Century South Australian Settlers in Relation to Their General Health and Compared With That of Contemporaneous Samples
Source: Preprints.org preprint supplement (doi:10.20944/preprints202302.0167.v1), 2023-02-09
Supplement: Supplementary file 6 [file Supplementary_Table S4_Intra & Inter-Op Results_Statiscal Analysis Summary_.docx]

| **Test** | **Comparison** | **Summary Results** | | |
| --- | --- | --- | --- | --- |
| **Agreement** | **AC2** | **Percentage agreement** |
| *Inventory* | | | | |
| Inter-operator | LV | Fair – Perfect | 0.31 - 1.00 | 67 - 100 |
|  | Macro | Poor - Perfect | -0.01 - 1.00 | 56 - 100 |
|  | Radio | Substantial - Perfect | 0.79 - 1.00 | 89 - 100 |
| Intra-operator | LV | Perfect | All 1.00 | All 100% |
|  | Macro | Moderate - Perfect | 0.53 - 1.00 | 67 – 100 |
|  | Radio | Substantial - Perfect | 0.79 – 1.00 | 89 – 100 |
| *Tooth wear* | | | | |
| Inter-operator | LV | Fair - Perfect | 0.20 – 1.00 | 63 – 100 |
|  | Macro | Moderate - Perfect | 0.53 – 1.00 | 75 – 100 |
|  | Radio | Moderate - Perfect | 0.47 – 1.00 | 75 – 100 |
| Intra-operator | LV | Perfect | All 1.00 | All 100% |
|  | Macro | Almost perfect | 0.81 – 100 | 88 – 100 |
|  | Radio | Substantial - Perfect | 0.78 – 1.00 | 88 – 100 |
| *Alveolar status* | | | | |
| Inter-operator | LV | Poor – Perfect | -0.18 – 1.00 | 38 – 100 |
|  | Macro | Poor – Perfect | -0.43 – 1.00 | 38 – 100 |
| Intra-operator | LV | Perfect | All 1.00 | All 100% |
|  | Macro | Fair – Perfect | 0.20 – 1.00 | 50 – 100 |
| *Caries* | | | | |
| Inter-operator | LV | Poor – Perfect | -1.00 – 1.00 | 0 – 100 |
|  | Macro | Poor – Perfect | -0.45 – 1.00 | 0 – 100 |
|  | Radio | Poor – Perfect | -0.45 – 1.00 | 0 – 100 |
| Intra-operator | LV | Fair – Perfect | 0.20 – 1.00 | 50 – 100 |
|  | Macro | Fair – Perfect | 0.27 – 1.00 | 50 – 100 |
|  | Radio | Fair – Perfect | 0.20 – 1.00 | 50 – 100 |
| *Enamel hypoplastic defects* | | | | |
| Inter-operator | LV | Poor – Perfect | -0.57 – 1.00 | 0 – 100 |
|  | Macro | Fair – Perfect | 0.20 – 1.00 | 50 – 100 |
| Intra-operator | LV | Fair – Perfect | 0.20 – 1.00 | 50 – 100 |
|  | Macro | Fair – Perfect | 0.27 – 1.00 | 50 – 100 |
| *Periodontal disease* | | | | |
|  |  |  | **ICC** |  |
| Inter-operator | LV | Poor – Excellent | 0.23 – 1.00 |  |
|  | Macro | Poor – Excellent | 0.21 – 1.00 |  |
| Intra-operator | LV | Poor – Excellent | 0.46 – 1.00 |  |
|  | Macro | Poor – Excellent | 0.00 – 1.00 |  |

**Supplementary Material Table S4.** Statistical Analysis Summary- Results from tests of intra- and inter-operator reliability for each of the methods assessed

Results are presented as AC1/AC2 with 95% confidence interval (CI) and percentage agreement for non-continuous data; ICC with 95% CI for continuous data. Interpretation of AC1 and AC2 was <0 poor agreement; 0 – 0.2 slight agreement; 0.21 – 0.4 fair agreement; 0.41 – 0.6 moderate agreement; 0.61 – 0.8 substantial agreement; >0.8 almost perfect agreement(Landis and Koch, 1977). Interpretation of ICC values was <0.50 poor agreement; 0.50-0.75 moderate agreement; 0.75-0.90 good agreement; >0.90 excellent agreement(Koo and Li, 2016). All analyses were performed using Stata v17 (StataCorp, 2022).

**Supplementary Material: Results - Reproducibility**

Table S4. (above), presents a summary of the results from tests of intra- and inter-operator reliability for each of the methods assessed. Additional information from the statistical analysis can be found in the supplementary material as Table S5 and the raw data as Data_S1_Gurr et al. 2022_RAW DATA_S1_EXCEL_.

Due to the small sample size, many tests achieved perfect agreement resulting in all summary ranges including perfect or excellent agreement. The LV Micro-CT method achieved better agreement than the Macroscopic and Radiographic techniques when assessing intra-operator agreement for inventory measures, tooth wear, and alveolar status (perfect agreement for all, compared with moderate to perfect (Macroscopic) or substantial to perfect (Radiographic); almost perfect (Macroscopic) or substantial to perfect (Radiographic); and fair to perfect (Macroscopic); for inventory, tooth wear and alveolar status, respectively). However, for the inventory and tooth wear measures the inter-operator agreement was better when using the Macroscopic or Radiographic techniques (poor to perfect (Macroscopic) and substantial to perfect (Radiographic) compared with fair to perfect (LV Micro-CT); and moderate to perfect (both Macroscopic and Radiographic) compared fair to perfect (LV Micro-CT); for inventory and tooth wear, respectively). For alveolar status the inter-operator agreement was the same for both LV Micro-CT and Macroscopic.

The LV Micro-CT method achieved the same level of agreement for all other measures when assessing both inter- and intra-operator as the other techniques. It should be noted though that the percentage agreement was very similar, between 81 and 100% agreement for LV Micro-CT and 88 to 100% agreement for Macroscopic.

**References:**

Koo, TK, & Li, MY 2016. A Guideline of Selecting and Reporting Intraclass Correlation Coefficients for Reliability Research. *Journal of chiropractic medicine, 15*(2), 155-163. DOI: 10.1016/j.jcm.2016.02.012

Landis, JR, & Koch, GG 1977. The Measurement of Observer Agreement for Categorical Data. *Biometrics, 33*(1), 159-174. DOI:10.2307/2529310

StataCorp LLC. (2022). Stata, Home: Products: New in Stata. Retrieved from <https://www.stata.com/new-in-stata/>
