# Supplementary material for: The Oral Health of a Group of 19th Century South Australian Settlers in Relation to Their General Health and Compared With That of Contemporaneous Samples
Source: Preprints.org preprint supplement (doi:10.20944/preprints202302.0167.v1), 2023-02-09
Supplement: Supplementary file 7 [file Supplementary_Table S5_Additional Info_Intra & Inter-Op Results_Statiscal Analysis_.docx]

**Supplementary Material Table S5.** Additional Information from the Statistical Analysis of intra- and inter-operator reliability for each of the methods assessed

| **Test** | **Comparison** | **Surface/Method** | **Summary Results** | | |
| --- | --- | --- | --- | --- | --- |
| **Agreement** | **AC2** | **Percentage agreement** |
| *Caries* | | | | | |
| Inter-operator | LV | Radiolucency | Substantial – Perfect | 0.71 – 1.00 | 79 – 100 |
|  |  | Caries - Present | Poor – Perfect | -1.00 – 1.00 | 0 – 100 |
|  |  | Caries on CEJ | Poor – Perfect | -0.33 – 1.00 | 0 – 100 |
|  |  | Caries above CEJ | Poor – Perfect | -0.45 – 1.00 | 0 – 100 |
|  |  | Caries below CEJ | Poor – Perfect | -0.33 – 1.00 | 0 – 100 |
|  |  | Caries on distal | Poor – Perfect | -0.33 – 1.00 | 0 – 100 |
|  |  | Caries on labial/buccal | Perfect | All 1.00 | All 100% |
|  |  | Caries on lingual | Perfect | All 1.00 | All 100% |
|  |  | Caries on mesial | Poor – Perfect | -0.45 – 1.00 | 0 – 100 |
|  |  | Caries on occlusal | Perfect | All 1.00 | All 100% |
|  | Macro | Caries - Present | Fair – Perfect | 0.20 – 1.00 | 50 – 100 |
|  |  | Caries on CEJ | Poor – Perfect | -0.45 – 1.00 | 0 – 100 |
|  |  | Caries above CEJ | Poor – Perfect | -0.45 – 1.00 | 0 – 100 |
|  |  | Caries below CEJ | Fair – Perfect | 0.27 – 1.00 | 50 – 100 |
|  |  | Caries on distal | Fair – Perfect | 0.27 – 1.00 | 50 – 100 |
|  |  | Caries on labial/buccal | Poor – Perfect | -0.33 – 1.00 | 0 – 100 |
|  |  | Caries on lingual | Fair – Perfect | 0.33 – 1.00 | 50 – 100 |
|  |  | Caries on mesial | Poor – Perfect | -0.45 – 1.00 | 0 – 100 |
|  |  | Caries on occlusal | Fair – Perfect | 0.27 – 1.00 | 50 – 100 |
|  | Radio | Radiolucency | Substantial – Perfect | 0.73 – 1.00 | 83 – 100 |
|  |  | Caries - Present | Poor – Perfect | -0.60 – 1.00 | 0 – 100 |
|  |  | Caries on distal | Poor – Perfect | -0.23 – 1.00 | 0 – 100 |
|  |  | Caries on mesial | Fair – Perfect | 0.27 – 1.00 | 50 – 100 |
| Intra-operator | LV | Radiolucency | Substantial – Perfect | 0.77 – 1.00 | 83 – 100 |
|  |  | Caries - Present | Fair – Perfect | 0.20 – 1.00 | 50 – 100 |
|  |  | Caries on CEJ | Fair – Perfect | 0.38 – 1.00 | 50 – 100 |
|  |  | Caries above CEJ | Fair – Perfect | 0.38 – 1.00 | 50 – 100 |
|  |  | Caries below CEJ | Fair – Perfect | 0.27 – 1.00 | 50 – 100 |
|  |  | Caries on distal | Fair – Perfect | 0.27 – 1.00 | 50 – 100 |
|  |  | Caries on labial/buccal | Perfect | All 1.00 | All 100% |
|  |  | Caries on lingual | Fair – Perfect | 0.38 – 1.00 | 50 – 100 |
|  |  | Caries on mesial | Fair – Perfect | 0.38 – 1.00 | 50 – 100 |
|  |  | Caries on occlusal | Fair – Perfect | 0.38 – 1.00 | 50 – 100 |
|  | Macro | Radiolucency | Moderate – Perfect | 0.53 – 1.00 | 67 – 100 |
|  |  | Caries - Present | Fair – Perfect | 0.27 – 1.00 | 50 – 100 |
|  |  | Caries on CEJ | Fair – Perfect | 0.27 – 1.00 | 50 – 100 |
|  |  | Caries above CEJ | Fair – Perfect | 0.27 – 1.00 | 50 – 100 |
|  |  | Caries below CEJ | Fair – Perfect | 0.27 – 1.00 | 50 – 100 |
|  |  | Caries on distal | Fair – Perfect | 0.27 – 1.00 | 50 – 100 |
|  |  | Caries on labial/buccal | Fair – Perfect | 0.27 – 1.00 | 50 – 100 |
|  |  | Caries on lingual | Fair – Perfect | 0.38 – 1.00 | 50 – 100 |
|  |  | Caries on mesial | Fair – Perfect | 0.27 – 1.00 | 50 – 100 |
|  |  | Caries on occlusal | Fair – Perfect | 0.27 – 1.00 | 50 – 100 |
|  | Radio | Radiolucency | Substantial - Perfect | 0.66 – 1.00 | 75 – 100 |
|  |  | Caries - Present | Fair – Perfect | 0.20 – 1.00 | 50 – 100 |
|  |  | Caries on distal | Fair – Perfect | 0.27 – 1.00 | 50 – 100 |
|  |  | Caries on mesial | Fair – Perfect | 0.27 – 1.00 | 50 – 100 |
