# Supplementary material for: The Oral Health of a Group of 19th Century South Australian Settlers in Relation to Their General Health and Compared With That of Contemporaneous Samples
Source: Preprints.org preprint supplement (doi:10.20944/preprints202302.0167.v1), 2023-02-09
Supplement: Supplementary file 8 [file Supplementary_Table S6_Miles (1962) Tooth wear_functional age of tooth & Predicted age range of subject.docx]

**Table S6.** Adults of St Mary’s Cemetery sample. Assessment of the functional age of each molar and the predicted age of the subject based on tooth wear scores set out by **Miles (1962). ***Notes for abbreviations follow this table

| **St Mary’s ID** | Age range  (skeletal /eruption findings)  (years) | Miles (1962) tooth wear (years) | **Jaw and tooth identification, including FDI notation numbers:** | | | | | | | | | | | |
| --- | --- | --- | --- | --- | --- | --- | --- | --- | --- | --- | --- | --- | --- | --- |
| **MAXILLA** | | | | | | **MANDIBLE** | | | | | |
| Upp R  **M1**  **16** | Upp R **M2**  **17** | Upp R **M3**  **18** | Upp L **M1**  **26** | Upp L **M2**  **27** | Upp L **M3**  **28** | Low L **M1**  **36** | Low L **M2**  **37** | Low L **M3**  **38** | Low R **M1**  **46** | Low R  **M2**  **47** | Low R  **M3**  **48** |
|  |  |  |  |  |  |  |  |  |  |  |  |
| **SMB 53C** | 30-39 | Functional age of teeth | **30** | AMTL | AMTL | AMTL | AMTL | AMTL | AMTL | AMTL | AMTL | **24** | AMTL | AMTL |
| Predicted age of subject | **36** | n/a | n/a | n/a | n/a | n/a | n/a | n/a | n/a | **30** | n/a | n/a |
| **SMB 66B** | 30-39 | Functional age | AMTL | **7** | AMTL | AMTL | 12 | AMTL | AMTL | AMTL | AMTL | AMTL | AMTL | AMTL |
| Predicted age | n/a | **18** | n/a | n/a | 26 | n/a | n/a | n/a | n/a | n/a | n/a | n/a |
| **SMB 73** | 30-39 | Functional age | **12** | AMTL | AMTL | AMTL | AMTL | **7** | AMTL | AMTL | AMTL | AMTL | AMTL | AMTL |
| Predicted age | **18** | n/a | n/a | n/a | n/a | **24** | n/a | n/a | n/a | n/a | n/a | n/a |
| **SMB 06** | 40-49 | Functional age | **30** | **13** | AMTL | **36** | **32** | PMTL | AMTL | **28** | Not erupted | **36** | **20** | Not erupted |
| Predicted age | **36** | **27** | n/a | **42** | **45** | n/a | n/a | **40** | n/a | **42** | **31** | n/a |
| **SMB 09** | 40-49 | Functional age | **18** | PMTL | PMTL | **12** | PMTL | PMTL | **15** | **7** | AMTL | **12** | **6.5** | **7** |
| Predicted age | **24** | n/a | n/a | **18** | n/a | n/a | **21** | **19** | n/a | **18** | **18** | **25** |
| **SMB 57** | 40-49 | Functional age | **27** | **25** | PMTL | **24** | **25** | AMTL | **16** | **16** | PMTL | **23** | **20** | **7** |
| Predicted age | **35** | **35** | n/a | **30** | **35** | n/a | **22** | **28** | n/a | **30** | **32** | **25** |
| **SMB 72** | 40-49 | Functional age | **12** | **5** | **14** | **12** | **5** | AMTL | **12** | **16** | **10** | **12** | **7** | **7** |
| Predicted age | **18** | **17** | **26** | **18** | **17** | n/a | **18** | **27** | **25** | **18** | **18** | **24** |
| **SMB 83** | 40-49 | Functional age | AMTL | AMTL | **32** | AMTL | **26** | **24** | AMTL | **26** | **42** | AMTL | **26** | **35** |
| Predicted age | n/a | n/a | **50** | n/a | **38** | **42** | n/a | **38** | **60** | n/a | **38** | **53** |
| **SMB 23** | 50-59 | Functional age | PMTL | PMTL | **28** | PMTL | PMTL | **7** | AMTL | **10** | AMTL | AMTL | **7** | AMTL |
| Predicted age | n/a | n/a | **46** | n/a | n/a | **25** | n/a | **22** | n/a | n/a | **19** | n/a |
| **SMB 59** | 50-59 | Functional age | AMTL | PMTL | PMTL | AMTL | PMTL | PMTL | PMTL | **7** | **7** | **30** | **13** | AMTL |
| Predicted age | n/a | n/a | n/a | n/a | n/a | n/a | n/a | **19** | **25** | **36** | **25** | n/a |
| **SMB 68** | 50-59 | Functional age | AMTL | **46** | **49** | PMTL | PMTL | PMTL | AMTL | **13** | **7** | AMTL | **20** | **24** |
| Predicted age | n/a | **58** | **67** | n/a | n/a | n/a | n/a | **25** | **24** | n/a | **32** | **42** |

***Notes:** **Upp** = Upper jaw (maxilla), **Low** = Lower jaw (mandible), **R** = Right side of the jaw, **L** = left side of the jaw. **FDI** = Fédération Dentaire Internationale tooth identification notation system. **AMTL** = Antemortem tooth loss. **PMTL**= Post-mortem tooth loss. **N/A** = not applicable. Not erupted = the tooth had not erupted through the alveolar bone. The alveolar bone did not show signs of healing and dental radiographs confirmed that the tooth was *or* was not within the bone. ‘*Functional age of tooth’* was scored by the wear on the occlusal surface of the permanent **M1** (first molar), **M2** (second molar), and **M3** (third molar) following Miles’s (1962) system. ‘*Predicted age of subject’* (individual person) following Miles’s (1962) scoring system.
