# Supplementary material for: The Oral Health of a Group of 19th Century South Australian Settlers in Relation to Their General Health and Compared With That of Contemporaneous Samples
Source: Preprints.org preprint supplement (doi:10.20944/preprints202302.0167.v1), 2023-02-09
Supplement: Supplementary file 9 [file Supplementary_Table S7a_S7b_ & S7c_MOLNAR ( 1971) St Mary's Adults_.docx]

**Table S7a.** Summary of findings for St Mary’s Cemetery adults using Molnar’s (1971) categories of tooth wear

| St Mary's  Burial ID | Age  range (years | Sex | Total number of permanent teeth present | Number of maxillary teeth | Number  of mandibular teeth | Number of teeth with Cat 1-3 | Number of teeth with  Cat. 4 | Number of teeth with Cat.5 | Number of teeth with  Cat. 6 | Number of teeth with  Cat. 7 | Number of teeth with  Cat. 8 |
| --- | --- | --- | --- | --- | --- | --- | --- | --- | --- | --- | --- |
|  |  |  |  |  |  |  |  |  |  |  |  |
| **SMB 05** | 20-29 | F | 6 | 0 | 6 | 4 | 2 | 0 | 0 | 0 | 0 |
| **SMB 53C** | 30-39 | F | 9 | 6 | 3 | 4 | 2 | 3 | 0 | 0 | 0 |
| **SMB 66B** | 30-39 | F | 17 | 8 | 9 | 9 | 7 | 1 | 0 | 0 | 0 |
| **SMB 73** | 30-39 | M | 19 | 9 | 10 | 6 | 12 | 1 | 0 | 0 | 0 |
| **SMB 06** | 40-49 | M | 25 | 13 | 12 | 1 | 10 | 8 | 5 | 1 | 0 |
| **SMB 09** | 40-49 | M | 22 | 9 | 13 | 14 | 4 | 4 | 0 | 0 | 0 |
| **SMB 57** | 40-49 | M | 25 | 11 | 14 | 3 | 10 | 12 | 0 | 0 | 0 |
| **SMB 61** | 40-49 | F | 6 | 2 | 4 | 4 | 1 | 0 | 0 | 1 | 0 |
| **SMB 72** | 40-49 | M | 30 | 15 | 15 | 16 | 11 | 3 | 0 | 0 | 0 |
| **SMB 78** | 40-49 | F | 4 | 2 | 2 | 1 | 0 | 2 | 1 | 0 | 0 |
| **SMB 83** | 40-49 | M | 15 | 7 | 8 | 2 | 7 | 4 | 2 | 0 | 0 |
| **SMB 85** | 40-49 | M | 2 | 0 | 2 | 0 | 0 | 2 | 0 | 0 | 0 |
| **SMB 14** | 50-59 | M | 2 | 1 | 1 | 0 | 1 | 0 | 1 | 0 | 0 |
| **SMB 23** | 50-59 | M | 21 | 10 | 11 | 8 | 6 | 6 | 0 | 0 | 1 |
| **SMB 59** | 50-59 | M | 16 | 6 | 10 | 5 | 5 | 1 | 4 | 1 | 0 |
| **SMB 63** | 50-59 | M | 3 | 0 | 3 | 0 | 1 | 2 | 0 | 0 | 0 |
| **SMB 68** | 50-59 | M | 19 | 7 | 12 | 5 | 4 | 8 | 2 | 0 | 0 |
|  | | |  |  |  |  |  |  |  |  |  |
| **TOTAL** | | | **241** | **106** | **135** | **82** | **83** | **57** | **15** | **3** | **1** |

**Table S7b.** Molnar’s (1971) Category of tooth wear assigned to the *maxillary* dentition of the adults from the St Mary’s sample

| **St Mary's  Burial ID** | Age  range (years | Sex | Jaw and permanent tooth identification, including FDI numbers  **Maxilla** | | | | | | | | | | | | | | | |
| --- | --- | --- | --- | --- | --- | --- | --- | --- | --- | --- | --- | --- | --- | --- | --- | --- | --- | --- |
| Upp  R Cent. Incisor   **11** | Upp  R  Lat Incisor   **12** | Upp  R  Canine    **13** | Upp  R P1  **14** | Upp  R  P2  **15** | Upp  R  M1  **16** | Upp  R  M2  **17** | Upp  R M3  **18** | Upp  L  Cent Incisor  **21** | Upp  L  Lat Incisor  **22** | Upp  L  Canine    **23** | Upp  L P1  **24** | Upp  L_  P2  **25** | Upp  L  M1  **26** | Upp  L  M2  **27** | Upp  L  M3  **28** |
|  |  |  |  |  |  |  |  |  |  |  |  |  |  |  |  |  |  |  |
| **SMB 05** | 20-29 | F | N/A | N/A | N/A | N/A | N/A | N/A | N/A | N/A | N/A | N/A | N/A | N/A | N/A | N/A | N/A | N/A |
| **SMB 53C** | 30-39 | F | 5 | N/A | 4 | N/A | N/A | 5 | N/A | N/A | 5 | N/A | 2 | 2 | N/A | N/A | N/A | N/A |
| **SMB 66B** | 30-39 | F | N/A | 3 | N/A | 3 | 2 | N/A | 2 | N/A | 5 | 3 | 3 | N/A | N/A | N/A | 4 | N/A |
| **SMB 73** | 30-39 | M | 4 | 4 | 3 | N/A | N/A | 2 | N/A | N/A | 4 | 4 | 4 | N/A | 4 | N/A | N/A | 2 |
| **SMB 06** | 40-49 | M | 5 | 4 | 3 | 5 | 5 | 6 | 6 | N/A | N/A | 4 | 5 | 4 | 4 | 6 | 6 | N/A |
| **SMB 09** | 40-49 | M | N/A | 5 | 4 | N/A | N/A | 2 | N/A | N/A | 5 | 4 | 3 | 3 | 3 | 3 | N/A | N/A |
| **SMB 57** | 40-49 | M | 5 | 5 | 5 | 4 | 4 | 4 | 5 | N/A | N/A | 5 | N/A | 3 | N/A | 4 | 5 | N/A |
| **SMB 61** | 40-49 | F | N/A | N/A | N/A | 7 | N/A | N/A | N/A | N/A | N/A | N/A | N/A | N/A | 1 | N/A | N/A | N/A |
| **SMB 72** | 40-49 | M | 5 | 3 | 4 | 2 | 2 | 3 | 4 | 4 | 5 | 4 | 4 | 3 | 3 | 4 | 3 | N/A |
| **SMB 78** | 40-49 | F | N/A | N/A | 5 | 2 | N/A | N/A | N/A | N/A | N/A | N/A | N/A | N/A | N/A | N/A | N/A | N/A |
| **SMB 83** | 40-49 | M | N/A | N/A | 5 | 4 | N/A | N/A | N/A | 5 | 4 | N/A | 4 | 3 | N/A | N/A | 4 | 3 |
| **SMB 85** | 40-49 | M | N/A | N/A | N/A | N/A | N/A | N/A | N/A | N/A | N/A | N/A | N/A | N/A | N/A | N/A | N/A | N/A |
| **SMB 14** | 50-59 | M | N/A | N/A | N/A | N/A | N/A | N/A | N/A | N/A | N/A | N/A | 6 | N/A | N/A | N/A | N/A | N/A |
| **SMB 23** | 50-59 | M | N/A | N/A | 5 | 4 | 2 | N/A | 2 | 2 | 5 | 5 | 5 | N/A | N/A | N/A | 2 | 8 |
| **SMB 59** | 50-59 | M | 4 | 4 | 5 | N/A | N/A | N/A | N/A | N/A | 4 | 4 | 6 | N/A | N/A | N/A | N/A | N/A |
| **SMB 63** | 50-59 | M | N/A | N/A | N/A | N/A | N/A | N/A | N/A | N/A | N/A | N/A | N/A | N/A | N/A | N/A | N/A | N/A |
| **SMB 68** | 50-59 | M | N/A | N/A | 5 | 5 | N/A | N/A | 6 | 6 | N/A | N/A | 5 | 4 | 4 | N/A | N/A | N/A |

**Table S7c.** Molnar’s (1971) Category of tooth wear assigned to the *mandibular* dentition of the adults from the St Mary’s sample

| **St Mary's  Burial ID** | Age  range (years) | Sex | Jaw and permanent tooth identification, including FDI numbers  **Mandible** | | | | | | | | | | | | | | | |
| --- | --- | --- | --- | --- | --- | --- | --- | --- | --- | --- | --- | --- | --- | --- | --- | --- | --- | --- |
| Low  L  Cent Incisor  **31** | Low  L  Lat Incisor  **32** | Low  L  Canine    **33** | Low  L P1  **34** | Low  L_  P2  **35** | Low  L  M1  **36** | Low  L  M2  **37** | Low  L  M3  **38** | Low  R Cent. Incisor   **41** | Low  R  Lat Incisor   **42** | Low  R  Canine    **43** | Low  R P1  **44** | Low  R  P2  **45** | Low  R  M1  **46** | Low  R  M2  **47** | Low  R M3  **48** |
|  |  |  |  |  |  |  |  |  |  |  |  |  |  |  |  |  |  |  |
| **SMB 05** | 20-29 | F | 4 | N/A | 1 | 2 | N/A | N/A | N/A | N/A | 3 | 4 | N/A | 2 | N/A | N/A | N/A | N/A |
| **SMB 53C** | 30-39 | F | N/A | N/A | N/A | 3 | N/A | N/A | N/A | N/A | N/A | 4 | N/A | N/A | N/A | 2 | N/A | N/A |
| **SMB 66B** | 30-39 | F | 4 | 4 | 4 | 3 | N/A | N/A | N/A | N/A | 4 | 4 | 4 | 3 | 3 | N/A | N/A | N/A |
| **SMB 73** | 30-39 | M | 4 | 4 | 5 | 2 | 4 | N/A | N/A | N/A | 4 | 4 | 3 | 3 | 4 | N/A | N/A | N/A |
| **SMB 06** | 40-49 | M | 5 | 4 | 4 | 5 | N/A | N/A | 7 | N/A | 4 | 4 | 5 | 4 | 4 | 6 | 5 | N/A |
| **SMB 09** | 40-49 | M | 5 | 5 | 3 | 3 | 3 | 4 | 4 | N/A | N/A | N/A | 3 | 2 | 2 | 3 | 3 | 3 |
| **SMB 57** | 40-49 | M | N/A | 5 | 5 | 5 | 4 | 4 | 4 | N/A | 5 | 5 | 5 | 4 | 3 | 4 | 4 | 3 |
| **SMB 61** | 40-49 | F | N/A | 3 | 4 | N/A | 2 | N/A | N/A | N/A | N/A | 2 | N/A | N/A | N/A | N/A | N/A | N/A |
| **SMB 72** | 50-59 | M | 4 | 4 | 5 | 2 | 2 | 3 | 3 | 2 | N/A | 4 | 4 | 2 | 2 | 4 | 3 | 2 |
| **SMB 78** | 40-49 | F | N/A | 5 | 6 | N/A | N/A | N/A | N/A | N/A | N/A | N/A | N/A | N/A | N/A | N/A | N/A | N/A |
| **SMB 83** | 40-49 | M | N/A | N/A | 5 | 5 | N/A | N/A | 5 | 6 | N/A | 4 | 4 | N/A | N/A | N/A | 4 | 6 |
| **SMB 85** | 40-49 | M | N/A | N/A | 5 | 5 | N/A | N/A | N/A | N/A | N/A | N/A | N/A | N/A | N/A | N/A | N/A | N/A |
| **SMB 14** | 50-59 | M | N/A | N/A | N/A | N/A | 4 | N/A | N/A | N/A | N/A | N/A | N/A | N/A | N/A | N/A | N/A | N/A |
| **SMB 23** | 50-59 | M | 5 | 5 | 4 | 4 | 2 | N/A | 2 | N/A | 4 | 4 | 4 | 3 | N/A | N/A | 2 | N/A |
| **SMB 59** | 50-59 | M | N/A | N/A | N/A | 6 | 7 | 6 | N/A | 2 | 3 | 3 | N/A | 6 | 4 | 2 | N/A | 2 |
| **SMB 63** | 50-59 | M | N/A | N/A | 5 | 5 | N/A | N/A | N/A | N/A | N/A | N/A | 4 | N/A | N/A | N/A | N/A | N/A |
| **SMB 68** | 50-59 | M | 5 | 4 | N/A | 3 | 3 | N/A | 3 | 3 | N/A | 5 | 4 | 5 | 2 | N/A | 5 | 5 |

**Notes:** **M** = male, **F** = female. A category was assigned to each tooth following **Molnar’s (1971) categories of occlusal tooth wear**. A higher category implies more tooth wear.Category 1 =1, Category 2 =2, Category 3 =3, Category 4 =4, Category 5 =5, Category 6 =6, Category 7 = 7, Category 8 = 8. **Upp** = upper, **Low** = lower, **Cent.** = central, **Lat**. = lateral, **P1** = first premolar, **P2** = second premolar, **M1** = first permanent molar, **M2** = second permanent molar, **M3** = third permanent molar. **N/A** = not applicable – tooth either lost antemortem or post-mortem and could not be observed.
