# Supplementary material for: The Oral Health of a Group of 19th Century South Australian Settlers in Relation to Their General Health and Compared With That of Contemporaneous Samples
Source: Preprints.org preprint supplement (doi:10.20944/preprints202302.0167.v1), 2023-02-09
Supplement: Supplementary file 10 [file Supplementary_Table S8a & S8b. Carious Lesions_locations_ (AutoRecovered).docx]

**Table S8a.** St Mary’s Cemetery Sample. Location of carious lesions on the surface/s of the teeth

| **St Mary’s**  **ID** | Estimation of age range  skeletal & eruption findings  (years) | Sex | *Total number  of teeth present |  | **Caries *above*  the CEJ | **Caries *on*  the CEJ | **Caries *below*  the CEJ |  | Location of caries:  Mesial | Location of caries:  Distal | Location of caries:  Occlusal | Location  of caries:  Labial/  Buccal | Location of caries:  Lingual/  Palatal | Total number of  Carious lesions |
| --- | --- | --- | --- | --- | --- | --- | --- | --- | --- | --- | --- | --- | --- | --- |
| **SMB 19** | 6-10 | U | 22 |  | 2 | 1 | 0 |  | 2 | 0 | 0 | 1 | 0 | 3 |
| **SMB 70** | 8-12 | U | 8 |  | 2 | 1 | 0 |  | 1 | 1 | 1 | 0 | 0 | 3 |
| **SMB 28** | 10-14 | U | 26 |  | 2 | 0 | 0 |  | 0 | 0 | 1 | 1 | 0 | 2 |
| **SMB 79** | 15-18 | U | 25 |  | 11 | 1 | 0 |  | 8 | 4 | 0 | 1 | 0 | 13 |
| **SMB 05** | 20-29 | F | 6 |  | 5 | 1 | 3 |  | 2 | 3 | 0 | 1 | 2 | 8 |
| **SMB 53C** | 30-39 | F | 9 |  | 12 | 0 | 0 |  | 8 | 3 | 1 | 0 | 0 | 12 |
| **SMB 66B** | 30-39 | F | 17 |  | 7 | 7 | 2 |  | 6 | 4 | 2 | 3 | 1 | 16 |
| **SMB 73** | 30-39 | M | 19 |  | 5 | 31 | 3 |  | 12 | 14 | 5 | 4 | 4 | 39 |
| **SMB 06** | 40-49 | M | 24 |  | 9 | 1 | 9 |  | 3 | 1 | 5 | 4 | 6 | 19 |
| **SMB 09** | 40-49 | M | 22 |  | 11 | 0 | 0 |  | 5 | 6 | 0 | 0 | 0 | 11 |
| **SMB 57** | 40-49 | M | 25 |  | 4 | 5 | 3 |  | 2 | 1 | 3 | 6 | 0 | 12 |
| **SMB 61** | 40-49 | F | 7 |  | 5 | 0 | 0 |  | 0 | 3 | 1 | 1 | 0 | 5 |
| **SMB 72** | 40-49 | M | 29 |  | 5 | 8 | 2 |  | 2 | 0 | 5 | 5 | 3 | 15 |
| **SMB 78** | 40-49 | M | 4 |  | 0 | 3 | 0 |  | 2 | 1 | 0 | 0 | 0 | 3 |
| **SMB 83** | 40-49 | M | 16 |  | 7 | 0 | 0 |  | 1 | 2 | 4 | 0 | 0 | 7 |
| **SMB 85** | 40-49 | M | 2 |  | 1 | 0 | 0 |  | 1 | 0 | 0 | 0 | 0 | 1 |
| **SMB 14** | 50-59 | M | 2 |  | 1 | 0 | 0 |  | 0 | 0 | 0 | 0 | 1 | 1 |
| **SMB 23** | 50-59 | M | 21 |  | 15 | 34 | 5 |  | 16 | 16 | 4 | 10 | 8 | 54 |
| **SMB 59** | 50-59 | M | 15 |  | 2 | 6 | 2 |  | 2 | 2 | 0 | 6 | 0 | 10 |
| **SMB 63** | 50-59 | M | 3 |  | 2 | 1 | 0 |  | 2 | 0 | 0 | 1 | 0 | 3 |
| **SMB 68** | 50-59 | M | 19 |  | 6 | 8 | 0 |  | 2 | 4 | 2 | 6 | 0 | 14 |
|  |  |  |  |  |  |  |  |  |  |  |  |  |  |  |
| **TOTAL** | | | **321** |  | **114** | **108** | **29** |  | **77** | **65** | **34** | **50** | **25** | **251** |

Note: *A tooth may have more than one carious lesion present. † CEJ= Cementoenamel Junction. **More than one carious lesion may be present *above* and/ or *on* and /or *below* the CEJ.

| **St Mary’s**  **ID** | Estimation of age range  skeletal & eruption findings  (years) | Sex | *Total number  of teeth present |  | Total number of  Carious lesions present |  | Carious lesions involving the enamel | Carious lesions involving the enamel & dentine | Carious lesions involving the enamel, dentine & pulp |
| --- | --- | --- | --- | --- | --- | --- | --- | --- | --- |
| **SMB 19** | 6-10 | U | 22 |  | 3 |  | 3 | 0 | 0 |
| **SMB 70** | 8-12 | U | 8 |  | 3 |  | 3 | 0 | 0 |
| **SMB 28** | 10-14 | U | 26 |  | 2 |  | 2 | 0 | 0 |
| **SMB 79** | 15-18 | U | 25 |  | 12 |  | 11 | 1 | 0 |
| **SMB 05** | 20-29 | F | 6 |  | 9 |  | 7 | 2 | 0 |
| **SMB 53C** | 30-39 | F | 9 |  | 12 |  | 11 | 1 | 0 |
| **SMB 66B** | 30-39 | F | 17 |  | 16 |  | 14 | 2 | 0 |
| **SMB 73** | 30-39 | M | 19 |  | 39 |  | 39 | 0 | 0 |
| **SMB 06** | 40-49 | M | 24 |  | 19 |  | 19 | 0 | 0 |
| **SMB 09** | 40-49 | M | 22 |  | 11 |  | 11 | 0 | 0 |
| **SMB 57** | 40-49 | M | 25 |  | 12 |  | 9 | 3 | 0 |
| **SMB 61** | 40-49 | F | 7 |  | 5 |  | 1 | 2 | 2 |
| **SMB 72** | 40-49 | M | 29 |  | 15 |  | 15 | 0 | 0 |
| **SMB 78** | 40-49 | M | 4 |  | 3 |  | 3 | 0 | 0 |
| **SMB 83** | 40-49 | M | 16 |  | 7 |  | 7 | 0 | 0 |
| **SMB 85** | 40-49 | M | 2 |  | 1 |  | 1 | 0 | 0 |
| **SMB 14** | 50-59 | M | 2 |  | 1 |  | 1 | 0 | 0 |
| **SMB 23** | 50-59 | M | 21 |  | 54 |  | 50 | 2 | 2 |
| **SMB 59** | 50-59 | M | 15 |  | 10 |  | 9 | 1 | 0 |
| **SMB 63** | 50-59 | M | 3 |  | 3 |  | 2 | 0 | 1 |
| **SMB 68** | 50-59 | M | 19 |  | 14 |  | 14 | 0 | 0 |
|  |  |  |  |  |  |  |  |  |  |
| **TOTAL** | | | **321** |  | **251** |  | **232** | **14** | **5** |

**Table S8b.** St Mary’s Cemetery Sample. Number of carious lesions involving either the enamel only, the enamel and dentine, or the enamel, dentine and pulp.

Note: *A tooth may have more than one carious lesion present.
