# Supplementary material for: The Oral Health of a Group of 19th Century South Australian Settlers in Relation to Their General Health and Compared With That of Contemporaneous Samples
Source: Preprints.org preprint supplement (doi:10.20944/preprints202302.0167.v1), 2023-02-09
Supplement: Supplementary file 11 [file Supplementary_Table S9_Calculus_Adults_St Mary's.docx]

**Table S9.** Dental calculus – an indication of the number, and percentage of teeth affected by calculus with the location and severity of the deposit for the adults of the St Mary’s Cemetery sample

| **St Mary’s Burial**  **I/D** | **Sex** | Estimation of age range  skeletal & eruption findings  (years) | Total number of  permanent teeth present | **Number of**  **Teeth with calculus** | **Percentage of teeth with calculus** | **Calculus****Present**  Tooth-type with  calculus present  FDI notation number/s | **Calculus Location**  1 = enamel surface only  2 = Root*  (Brothwell, 1963; Connell and Rauxloh, 2003; Powers, 2012) | **Calculus Severity**  1 = small (slight)  2 = medium  3 = large (heavy/ considerable)  (Brothwell, 1963; Connell and Rauxloh, 2003; Powers, 2012) |
| --- | --- | --- | --- | --- | --- | --- | --- | --- |
| **SMB 05** | F | 20-29 | 6 | 6 | 100% | 32, 35 41, 42, 43, 44 | All teeth = enamel | 35, 44 = small (slight),  32, 41, 42, & 43 = medium |
| **SMB 53 C** | F | 30-39 | 9 | 1 | 11% | 42 | 42 = root | 42 = small |
| **SMB 66 B** | F | 30-39 | 17 | 6 | 35% | 31, 32, 41, 42, 43, 44 | All teeth = root | All teeth = small |
| **SMB 73** | M | 30-39 | 19 | 0 | 0 | N/A | N/A | N/A |
| **SMB 06** | M | 40-49 | 24 | 14 | 58% | 12, 16, 17, 23, 25, 26, 27, 32, 33, 37, 41, 44, 45, 47 | 12, 17, 23, 26, 32, 33, 37, 45 = enamel,  16, 25, 27, 47 = root | 12, 17, 23, 25, 26, 27, 32, 33, 37, 44, 45, 47 = small,  16 = medium |
| **SMB 09** | M | 40-49 | 22 | 15 | 68% | 12, 13, 16, 26, 27, 31, 32, 36, 37, 43, 44, 45, 46, 47, 48 | 12, 13, 16, 22, 23, 24, 26, 31, 32, 36, 43, 44, 45, 46, 47, 48 = enamel,  26, 37 = root | All teeth = small |
| **SMB 57** | M | 40-49 | 25 | 14 | 56% | 15, 16, 17, 18, 22, 26, 27, 32, 33, 34, 35, 36, 44, 45 | All teeth = enamel | All teeth = small |
| **SMB 61** | F | 40-49 | 7 | 3 | 43% | 32, 42, 44 | 32 & 42 = enamel,  44 = root | All teeth = small |
| **SMB 72** | M | 40-49 | 29 | 2 | 7% | 42, 43 | 42 & 43 = enamel | All teeth = small |
| **SMB 78** | M | 40-49 | 4 | 4 | 100% | 13, 14, 34, 35 | All teeth = enamel | All teeth = small |
| **SMB 83** | M | 40-49 | 16 | 14 | 88% | 13, 14, 17, 23, 24, 27, 28, 33, 34, 37, 42, 43, 47, 48 | 14, 17, 23, 24, 27, 28, 42, 43, 47,48 = enamel,  13, 33, 34, 37, 42 = root | 13, 14, 17, 28, 33, 34, 37 = small,  23, 24, 27, 42, 43, 47, 48 = medium |
| **SMB 85** | M | 40-49 | 2 | 0 | 0 | N/A | N/A | N/A |
| **SMB 14** | M | 50-59 | 2 | 0 | 0 | N/A | N/A | N/A |
| **SMB 23** | M | 50-59 | 21 | 0 | 0 | N/A | N/A | N/A |
| **SMB 59** | M | 50-59 | 15 | 1 | 7% | 46 | 46 = enamel | 46 = small |
| **SMB 63** | M | 50-59 | 3 | 0 | 0 | N/A | N/A | N/A |
| **SMB 68** | M | 50-59 | 19 | 0 | 0 | N/A | N/A | N/A |

**Notes**: F = female, M = male. **†** Dental eruption age range – “Over 23.5 years”= Estimation of dental age range is based on development and when this is complete. FDI = Fédération Dentaire Internationale tooth identification notation system. *****Guidelines, system, and criteria followed as set out by Brothwell, 1963; Connell and Rauxloh, 2003; Powers, 2012, of the Museum of London.

**References:**

**Anson,** T.J., 2004. The bioarchaeology of the St. Mary's free ground burials: reconstruction of colonial South Australian lifeways, Thesis (Ph.D.)-University of Adelaide, Dept. of Anatomical Sciences, 2004.

**AlQahtani,** S.J., Hector, M.P., Liversidge, H.M., 2010. Brief communication: The London atlas of human tooth development and eruption, American Journal of Physical Anthropology 142, 481-490.

**Brothwell,** D.R. 1963. *Digging up Bones: the excavation, treatment and study of the human skeletal remains*. British Museum Natural History: London.

**Connell**, B, and Rauxloh, P. 2003. *A Rapid Method for Recording Human Skeletal Data*. Museum of London: London.

**FDI World Dental Federation**, 2022. FDI Two-Digit Notation, FDI World Dental Federation, France.

**Powers,** N. 2012. *Human Osteology Method Statement*. Museum of London: London.
